# Supplementary material for: Transcriptomic profiling of purple broccoli reveals light-induced anthocyanin biosynthetic signaling and structural genes
Source: PeerJ. 2020 May 5;8:e8870. doi: 10.7717/peerj.8870 (PMC7207213; doi:10.7717/peerj.8870)
Supplement: Table S1 [file peerj-08-8870-s006.xlsx]

## Sheet: sheet1
Total anthocyanin amounts (mg g−1 FW)
treatments	days	1st test	2st test	3st test	Average contents of anthocyanin
CK	0	0.124	0.104	0.117	0.115
	3	0.241	0.301	0.259	0.267
	5	0.775	0.848	1.26	0.961114
	7	2.949	2.418	3.012	2.79289
	9	5.37	5.614	5.285	5.42296
	11	5.392	5.872	5.908	5.72354
	14	5.663	5.664	5.833	5.72
Head shading	0	0.124	0.104	0.117	0.115
	3	0.168	0.119	0.121	0.136
	5	0.409	0.359	0.3	0.356
	7	0.973	0.912	0.743	0.876
	9	1.355	1.3	0.984	1.213
	11	1.907	2.155	1.566	1.876
	14	2.061	1.902	2.37	2.111
Leaf shading	0	0.124	0.104	0.117	0.115
	3	0.112	0.208	0.136	0.152
	5	0.605	0.686	0.332	0.541
	7	2.199	1.853	2.185	2.079
	9	2.366	2.408	2.339	2.371
	11	2.79	2.45	2.464	2.568
	14	2.959	2.662	3.016	2.879
