# Supplementary material for: Transcriptomic profiling of purple broccoli reveals light-induced anthocyanin biosynthetic signaling and structural genes
Source: PeerJ. 2020 May 5;8:e8870. doi: 10.7717/peerj.8870 (PMC7207213; doi:10.7717/peerj.8870)
Supplement: Table S4 [file peerj-08-8870-s009.xlsx]

## Sheet: Sheet1
Table S2 GO enrichment analysis for down-regulated DEGs in B53WJ-vs-B53CK
id	term	category	pval	Enrichment_score	Number of Go annotated DEGs
GO:0015979	photosynthesis	biological_process	2.93339e-15	8.50402	22
GO:0009416	response to light stimulus	biological_process	3.37802e-11	5.42638	22
GO:0018298	protein-chromophore linkage	biological_process	1.89956e-07	7.14445	10
GO:0009768	photosynthesis, light harvesting in photosystem I	biological_process	3.35475e-07	13.2248	6
GO:0009773	photosynthetic electron transport in photosystem I	biological_process	6.94273e-07	15.6961	5
GO:0010025	wax biosynthetic process	biological_process	1.53975e-06	6.47465	9
GO:0009704	de-etiolation	biological_process	3.05561e-06	12.3327	5
GO:0010206	photosystem II repair	biological_process	3.7111e-06	16.5751	4
GO:0080167	response to karrikin	biological_process	4.74567e-06	4.37723	12
GO:0044375	regulation of peroxisome size	biological_process	1.07445e-05	20.7189	3
GO:0009535	chloroplast thylakoid membrane	cellular_component	3.27944e-27	6.12046	54
GO:0009579	thylakoid	cellular_component	4.88507e-26	9.21918	38
GO:0009534	chloroplast thylakoid	cellular_component	3.02539e-22	9.2084	32
GO:0009507	chloroplast	cellular_component	4.41615e-20	2.40051	116
GO:0009570	chloroplast stroma	cellular_component	4.82596e-14	3.21223	52
GO:0010287	plastoglobule	cellular_component	8.28038e-13	9.07787	17
GO:0009543	chloroplast thylakoid lumen	cellular_component	7.27271e-12	11.7107	13
GO:0031977	thylakoid lumen	cellular_component	9.00717e-12	13.0856	12
GO:0009523	photosystem II	cellular_component	1.37574e-11	14.6095	11
GO:0009522	photosystem I	cellular_component	1.51844e-10	16.6491	9
GO:0016168	chlorophyll binding	molecular_function	1.44798e-10	13.9993	10
GO:0046863	ribulose-1,5-bisphosphate carboxylase/oxygenase activator activity	molecular_function	4.87591e-10	69.063	4
GO:0045430	chalcone isomerase activity	molecular_function	4.24938e-08	62.1567	3
GO:0102336	3-oxo-arachidoyl-CoA synthase activity	molecular_function	2.87892e-07	13.5123	6
GO:0102337	3-oxo-cerotoyl-CoA synthase activity	molecular_function	2.87892e-07	13.5123	6
GO:0102338	3-oxo-lignoceronyl-CoA synthase activity	molecular_function	2.87892e-07	13.5123	6
GO:0102756	very-long-chain 3-ketoacyl-CoA synthase activity	molecular_function	2.87892e-07	13.5123	6
GO:0009922	fatty acid elongase activity	molecular_function	1.84493e-05	18.2814	3
GO:0042802	identical protein binding	molecular_function	3.00331e-05	3.15196	15
GO:0019904	protein domain specific binding	molecular_function	3.04112e-05	4.6156	9
