# Supplementary material for: Transcriptomic profiling of purple broccoli reveals light-induced anthocyanin biosynthetic signaling and structural genes
Source: PeerJ. 2020 May 5;8:e8870. doi: 10.7717/peerj.8870 (PMC7207213; doi:10.7717/peerj.8870)
Supplement: Table S6 [file peerj-08-8870-s011.xlsx]

## Sheet: Trinity_assembly300bp_vs_Ath_an
Table S4 de novo assembly and annotation
Query	Subject	Annotation	E_Value
assembly1_558bp	NoHits
assembly2_455bp	AT4G21192.1	Symbols: | Cytochrome c oxidase biogenesis protein Cmc1-like | chr4:11294563-11295192 FORWARD LENGTH=80	1e-07
assembly3_346bp	AT3G10050.1	Symbols: OMR1 | L-O-methylthreonine resistant 1 | chr3:3099164-3101741 REVERSE LENGTH=592	4e-39
assembly4_774bp	AT2G16060.1	Symbols: GLB1, AHB1, ARATH GLB1, NSHB1, ATGLB1, HB1 | hemoglobin 1 | chr2:6982782-6983522 REVERSE LENGTH=160	1e-73
assembly5_357bp	NoHits
assembly6_425bp	AT2G31900.1	Symbols: XIF, ATXIF, ATMYO5 | myosin-like protein XIF | chr2:13560760-13569623 REVERSE LENGTH=1556	7e-70
assembly7_504bp	NoHits
assembly8_664bp	AT1G15440.1	Symbols: PWP2, ATPWP2 | periodic tryptophan protein 2 | chr1:5306159-5309460 REVERSE LENGTH=900	e-133
assembly9_495bp	NoHits
assembly10_522bp	NoHits
assembly11_331bp	AT4G29350.1	Symbols: PFN2, PRO2, PRF2 | profilin 2 | chr4:14450135-14451119 FORWARD LENGTH=131	2e-14
assembly12_342bp	AT3G27310.1	Symbols: PUX1 | plant UBX domain-containing protein 1 | chr3:10087360-10089077 REVERSE LENGTH=251	6e-11
assembly13_1476bp	AT2G33255.1	Symbols: | Haloacid dehalogenase-like hydrolase (HAD) superfamily protein | chr2:14098795-14100358 FORWARD LENGTH=245	9e-74
assembly14_301bp	NoHits
assembly15_1065bp	AT1G80470.1	Symbols: | F-box/RNI-like/FBD-like domains-containing protein | chr1:30256185-30257916 FORWARD LENGTH=481	9e-12
assembly16_647bp	NoHits
assembly17_374bp	NoHits
assembly18_1373bp	AT5G46050.1	Symbols: ATPTR3, PTR3 | peptide transporter 3 | chr5:18675062-18679071 REVERSE LENGTH=582	0
assembly19_3099bp	AT2G17550.1	Symbols: | unknown protein; Has 264 Blast hits to 258 proteins in 65 species: Archae - 5; Bacteria - 5; Metazoa - 66; Fungi - 16; Plants - 107; Viruses - 0; Other Eukaryotes - 65 (source: NCBI BLink). | chr2:7634495-7637212 REVERSE LENGTH=779	0
assembly20_727bp	AT5G59160.1	Symbols: TOPP2, PPO | type one serine/threonine protein phosphatase 2 | chr5:23879567-23881102 FORWARD LENGTH=312	8e-10
assembly21_699bp	AT1G76360.1	Symbols: | Protein kinase superfamily protein | chr1:28643242-28646483 REVERSE LENGTH=484	8e-23
assembly22_330bp	NoHits
assembly23_770bp	NoHits
assembly24_768bp	AT1G21960.1	Symbols: | RING/U-box superfamily protein | chr1:7725972-7726586 FORWARD LENGTH=204	1e-36
assembly25_336bp	NoHits
assembly26_381bp	AT1G61870.1	Symbols: PPR336 | pentatricopeptide repeat 336 | chr1:22865326-22866552 REVERSE LENGTH=408	1e-07
assembly27_1022bp	AT3G18010.1	Symbols: WOX1 | WUSCHEL related homeobox 1 | chr3:6161155-6163183 REVERSE LENGTH=350	3e-08
assembly28_537bp	AT3G19210.1	Symbols: ATRAD54, CHR25, RAD54 | homolog of RAD54 | chr3:6652799-6658876 REVERSE LENGTH=910	1e-07
assembly29_461bp	AT3G53990.1	Symbols: | Adenine nucleotide alpha hydrolases-like superfamily protein | chr3:19989658-19991019 REVERSE LENGTH=160	9e-70
assembly30_561bp	AT2G40970.1	Symbols: MYBC1 | Homeodomain-like superfamily protein | chr2:17097772-17098518 REVERSE LENGTH=248	6e-28
assembly31_403bp	AT4G14420.1	Symbols: | HR-like lesion-inducing protein-related | chr4:8302171-8303738 REVERSE LENGTH=158	6e-09
assembly32_512bp	NoHits
assembly33_516bp	AT1G69960.1	Symbols: PP2A | serine/threonine protein phosphatase 2A | chr1:26348892-26350511 REVERSE LENGTH=307	1e-06
assembly34_345bp	NoHits
assembly35_506bp	AT3G22170.1	Symbols: FHY3 | far-red elongated hypocotyls 3 | chr3:7822359-7825414 REVERSE LENGTH=839	4e-20
assembly36_462bp	AT3G52880.2	Symbols: ATMDAR1, MDAR1 | monodehydroascorbate reductase 1 | chr3:19601477-19604366 REVERSE LENGTH=466	2e-07
assembly37_325bp	NoHits
assembly38_358bp	AT1G32700.1	Symbols: | PLATZ transcription factor family protein | chr1:11827588-11829444 FORWARD LENGTH=213	2e-11
assembly39_339bp	AT5G42900.1	Symbols: COR27 | cold regulated gene 27 | chr5:17198366-17199712 REVERSE LENGTH=246	1e-24
assembly40_413bp	AT2G38740.1	Symbols: | Haloacid dehalogenase-like hydrolase (HAD) superfamily protein | chr2:16194639-16195995 REVERSE LENGTH=244	9e-89
assembly41_380bp	AT3G55270.1	Symbols: MKP1, ATMKP1 | mitogen-activated protein kinase phosphatase 1 | chr3:20496775-20499408 FORWARD LENGTH=784	5e-07
assembly42_361bp	NoHits
assembly43_436bp	AT5G15080.1	Symbols: | Protein kinase superfamily protein | chr5:4886414-4888555 FORWARD LENGTH=493	1e-17
assembly44_346bp	AT5G65683.1	Symbols: | Zinc finger (C3HC4-type RING finger) family protein | chr5:26261472-26263704 FORWARD LENGTH=717	7e-10
assembly45_490bp	AT5G45170.1	Symbols: | Haloacid dehalogenase-like hydrolase (HAD) superfamily protein | chr5:18270555-18273129 REVERSE LENGTH=372	2e-11
assembly46_1337bp	AT5G15720.1	Symbols: GLIP7 | GDSL-motif lipase 7 | chr5:5124684-5126155 REVERSE LENGTH=364	0
assembly47_317bp	NoHits
assembly48_741bp	NoHits
assembly49_300bp	NoHits
assembly50_514bp	AT2G39660.1	Symbols: BIK1 | botrytis-induced kinase1 | chr2:16531943-16533601 FORWARD LENGTH=395	3e-28
assembly51_313bp	AT3G50980.1	Symbols: XERO1 | dehydrin xero 1 | chr3:18942034-18942721 FORWARD LENGTH=128	8e-10
assembly52_429bp	NoHits
assembly53_512bp	NoHits
assembly54_327bp	AT5G19650.1	Symbols: ATOFP8, OFP8 | ovate family protein 8 | chr5:6639632-6640297 REVERSE LENGTH=221	1e-20
assembly55_319bp	NoHits
assembly56_1031bp	NoHits
assembly57_485bp	AT5G41970.1	Symbols: | Metal-dependent protein hydrolase | chr5:16791198-16792961 FORWARD LENGTH=373	e-107
assembly58_332bp	NoHits
assembly59_314bp	NoHits
assembly60_771bp	AT1G74510.2	Symbols: | Galactose oxidase/kelch repeat superfamily protein | chr1:28006065-28007420 FORWARD LENGTH=451	e-111
assembly61_363bp	AT3G11030.1	Symbols: TBL32 | TRICHOME BIREFRINGENCE-LIKE 32 | chr3:3457300-3459300 REVERSE LENGTH=451	1e-11
assembly62_408bp	AT5G49760.1	Symbols: | Leucine-rich repeat protein kinase family protein | chr5:20216679-20221052 FORWARD LENGTH=953	8e-22
assembly63_497bp	AT1G63610.2	Symbols: | unknown protein; FUNCTIONS IN: molecular_function unknown; INVOLVED IN: biological_process unknown; LOCATED IN: chloroplast; EXPRESSED IN: 22 plant structures; EXPRESSED DURING: 13 growth stages; BEST Arabidopsis thaliana protein match is: unknown protein (TAIR:AT2G14910.1); Has 35333 Blast hits to 34131 proteins in 2444 species: Archae - 798; Bacteria - 22429; Metazoa - 974; Fungi - 9…	4e-10
assembly64_389bp	AT1G56110.1	Symbols: NOP56 | homolog of nucleolar protein NOP56 | chr1:20984544-20986893 REVERSE LENGTH=522	6e-61
assembly65_516bp	NoHits
assembly66_354bp	NoHits
assembly67_361bp	AT2G33340.1	Symbols: MAC3B | MOS4-associated complex 3B | chr2:14126584-14131000 REVERSE LENGTH=525	2e-27
assembly68_338bp	NoHits
assembly69_388bp	AT2G01600.1	Symbols: | ENTH/ANTH/VHS superfamily protein | chr2:268975-272356 FORWARD LENGTH=571	1e-50
assembly70_1415bp	AT4G22900.1	Symbols: | Protein of unknown function (DUF1191) | chr4:12010221-12011252 FORWARD LENGTH=343	e-157
assembly71_489bp	AT1G51940.1	Symbols: | protein kinase family protein / peptidoglycan-binding LysM domain-containing protein | chr1:19296092-19298941 REVERSE LENGTH=651	1e-11
assembly72_965bp	NoHits
assembly73_360bp	AT4G10540.1	Symbols: | Subtilase family protein | chr4:6512515-6515743 REVERSE LENGTH=775	3e-35
assembly74_468bp	AT3G20020.1	Symbols: ATPRMT6, PRMT6 | protein arginine methyltransferase 6 | chr3:6984055-6987945 REVERSE LENGTH=435	9e-20
assembly75_563bp	AT2G44640.1	Symbols: | FUNCTIONS IN: molecular_function unknown; INVOLVED IN: biological_process unknown; LOCATED IN: mitochondrion, chloroplast, plasma membrane, plastid, chloroplast envelope; EXPRESSED IN: 23 plant structures; EXPRESSED DURING: 13 growth stages; CONTAINS InterPro DOMAIN/s: Protein of unknown function DUF3769 (InterPro:IPR022244); BEST Arabidopsis thaliana protein match is: pigment defectiv…	8e-95
assembly76_370bp	NoHits
assembly77_381bp	NoHits
assembly78_1114bp	AT2G37050.3	Symbols: | Leucine-rich repeat protein kinase family protein | chr2:15569290-15573477 FORWARD LENGTH=934	0
assembly79_363bp	NoHits
assembly80_317bp	AT3G15140.1	Symbols: | Polynucleotidyl transferase, ribonuclease H-like superfamily protein | chr3:5099712-5101717 REVERSE LENGTH=337	3e-09
assembly81_695bp	NoHits
assembly82_635bp	AT3G15020.1	Symbols: mMDH2 | Lactate/malate dehydrogenase family protein | chr3:5056139-5057941 FORWARD LENGTH=341	1e-95
assembly83_348bp	AT1G66430.1	Symbols: | pfkB-like carbohydrate kinase family protein | chr1:24778400-24780393 FORWARD LENGTH=384	1e-11
assembly84_545bp	NoHits
assembly85_411bp	NoHits
assembly86_438bp	AT3G08730.1	Symbols: ATPK1, ATPK6, ATS6K1, PK6, PK1, S6K1 | protein-serine kinase 1 | chr3:2651581-2653363 REVERSE LENGTH=465	1e-33
assembly87_921bp	NoHits
assembly88_435bp	NoHits
assembly89_328bp	NoHits
assembly90_630bp	NoHits
assembly91_407bp	AT5G14880.1	Symbols: | Potassium transporter family protein | chr5:4814244-4817667 FORWARD LENGTH=781	2e-31
assembly92_427bp	AT3G19390.1	Symbols: | Granulin repeat cysteine protease family protein | chr3:6723024-6724768 FORWARD LENGTH=452	1e-38
assembly93_547bp	AT1G75510.1	Symbols: | Transcription initiation factor IIF, beta subunit | chr1:28347254-28348629 REVERSE LENGTH=261	5e-09
assembly94_784bp	NoHits
assembly95_360bp	AT4G15130.1	Symbols: ATCCT2, CCT2 | phosphorylcholine cytidylyltransferase2 | chr4:8637793-8639388 FORWARD LENGTH=304	2e-08
assembly96_722bp	NoHits
assembly97_416bp	NoHits
assembly98_838bp	AT4G39920.1	Symbols: POR, TFC C | C-CAP/cofactor C-like domain-containing protein | chr4:18515882-18516919 FORWARD LENGTH=345	2e-43
assembly99_378bp	AT2G37600.1	Symbols: | Ribosomal protein L36e family protein | chr2:15774410-15775203 REVERSE LENGTH=113	9e-12
assembly100_326bp	AT3G53800.1	Symbols: Fes1B | Fes1B | chr3:19930942-19932719 FORWARD LENGTH=363	8e-11
assembly101_699bp	NoHits
assembly102_598bp	AT2G12190.1	Symbols: | Cytochrome P450 superfamily protein | chr2:4891807-4893345 REVERSE LENGTH=512	2e-91
assembly103_317bp	AT1G12780.1	Symbols: UGE1, ATUGE1 | UDP-D-glucose/UDP-D-galactose 4-epimerase 1 | chr1:4356124-4358120 REVERSE LENGTH=351	4e-07
assembly104_425bp	AT1G29720.1	Symbols: | Leucine-rich repeat transmembrane protein kinase | chr1:10393894-10399771 REVERSE LENGTH=1019	9e-52
assembly105_439bp	NoHits
assembly106_697bp	AT5G55350.1	Symbols: | MBOAT (membrane bound O-acyl transferase) family protein | chr5:22442356-22443393 REVERSE LENGTH=345	1e-62
assembly107_380bp	AT1G53080.1	Symbols: | Legume lectin family protein | chr1:19781368-19782219 FORWARD LENGTH=283	2e-64
assembly108_368bp	AT1G01940.1	Symbols: | Cyclophilin-like peptidyl-prolyl cis-trans isomerase family protein | chr1:323082-324719 FORWARD LENGTH=160	4e-11
assembly109_417bp	AT3G62560.1	Symbols: | Ras-related small GTP-binding family protein | chr3:23137539-23138880 FORWARD LENGTH=193	1e-11
assembly110_324bp	NoHits
assembly111_471bp	AT3G52990.1	Symbols: | Pyruvate kinase family protein | chr3:19649046-19652237 FORWARD LENGTH=527	2e-11
assembly112_410bp	NoHits
assembly113_318bp	NoHits
assembly114_584bp	AT3G06330.1	Symbols: | RING/U-box superfamily protein | chr3:1917334-1919709 FORWARD LENGTH=426	6e-68
assembly115_374bp	NoHits
assembly116_454bp	AT3G51610.1	Symbols: | unknown protein; FUNCTIONS IN: molecular_function unknown; INVOLVED IN: response to oxidative stress; LOCATED IN: endomembrane system; EXPRESSED IN: 25 plant structures; EXPRESSED DURING: 15 growth stages; Has 53 Blast hits to 53 proteins in 21 species: Archae - 0; Bacteria - 0; Metazoa - 0; Fungi - 0; Plants - 48; Viruses - 0; Other Eukaryotes - 5 (source: NCBI BLink). | chr3:19139715…	9e-12
assembly117_773bp	AT2G40460.1	Symbols: | Major facilitator superfamily protein | chr2:16897123-16901171 FORWARD LENGTH=583	9e-07
assembly118_483bp	AT4G32800.1	Symbols: | Integrase-type DNA-binding superfamily protein | chr4:15819812-15820477 FORWARD LENGTH=221	1e-32
assembly119_344bp	AT4G38430.1	Symbols: ATROPGEF1, ROPGEF1 | rho guanyl-nucleotide exchange factor 1 | chr4:17986643-17988659 FORWARD LENGTH=548	8e-09
assembly120_418bp	NoHits
assembly121_530bp	NoHits
assembly122_556bp	AT5G36290.1	Symbols: | Uncharacterized protein family (UPF0016) | chr5:14302977-14304972 FORWARD LENGTH=293	7e-08
assembly123_436bp	AT1G10270.1	Symbols: GRP23 | glutamine-rich protein 23 | chr1:3363535-3366276 FORWARD LENGTH=913	3e-25
assembly124_365bp	AT2G32720.1	Symbols: B5 #4, ATCB5-B, CB5-B | cytochrome B5 isoform B | chr2:13877013-13878447 REVERSE LENGTH=134	1e-68
assembly125_600bp	AT4G38900.1	Symbols: | Basic-leucine zipper (bZIP) transcription factor family protein | chr4:18139564-18141520 REVERSE LENGTH=553	1e-16
assembly126_408bp	AT1G34300.1	Symbols: | lectin protein kinase family protein | chr1:12503450-12505939 FORWARD LENGTH=829	6e-22
assembly127_394bp	NoHits
assembly128_925bp	NoHits
assembly129_410bp	AT3G63520.1	Symbols: CCD1, ATCCD1, ATNCED1, NCED1 | carotenoid cleavage dioxygenase 1 | chr3:23452940-23455896 FORWARD LENGTH=538	2e-41
assembly130_540bp	AT5G58940.1	Symbols: CRCK1 | calmodulin-binding receptor-like cytoplasmic kinase 1 | chr5:23798659-23800716 FORWARD LENGTH=470	7e-61
assembly131_484bp	AT5G05880.1	Symbols: | UDP-Glycosyltransferase superfamily protein | chr5:1769648-1771515 FORWARD LENGTH=451	3e-68
assembly132_493bp	NoHits
assembly133_516bp	AT1G70700.1	Symbols: JAZ9, TIFY7 | TIFY domain/Divergent CCT motif family protein | chr1:26654951-26656804 FORWARD LENGTH=267	6e-29
assembly134_1005bp	NoHits
assembly135_373bp	AT3G03950.3	Symbols: ECT1 | evolutionarily conserved C-terminal region 1 | chr3:1021502-1023767 FORWARD LENGTH=428	9e-13
assembly136_458bp	AT2G01520.1	Symbols: MLP328 | MLP-like protein 328 | chr2:235992-236881 FORWARD LENGTH=151	4e-15
assembly137_558bp	AT1G19210.1	Symbols: | Integrase-type DNA-binding superfamily protein | chr1:6626973-6627530 REVERSE LENGTH=185	7e-64
assembly138_326bp	AT1G68850.1	Symbols: | Peroxidase superfamily protein | chr1:25883806-25885177 REVERSE LENGTH=336	7e-36
assembly139_411bp	NoHits
assembly140_460bp	NoHits
assembly141_525bp	AT1G01440.1	Symbols: | Protein of unknown function (DUF3133) | chr1:159935-162219 REVERSE LENGTH=664	1e-49
assembly142_454bp	AT2G25210.1	Symbols: | Ribosomal protein L39 family protein | chr2:10740157-10740379 FORWARD LENGTH=44	1e-14
assembly143_445bp	AT1G05690.1	Symbols: BT3 | BTB and TAZ domain protein 3 | chr1:1707809-1709132 FORWARD LENGTH=364	3e-57
assembly144_762bp	AT3G62820.1	Symbols: | Plant invertase/pectin methylesterase inhibitor superfamily protein | chr3:23229782-23230366 FORWARD LENGTH=194	4e-90
assembly145_716bp	AT5G52930.1	Symbols: | Protein of unknown function (DUF295) | chr5:21470370-21471449 FORWARD LENGTH=359	3e-66
assembly146_460bp	AT4G27880.1	Symbols: | Protein with RING/U-box and TRAF-like domains | chr4:13883623-13884927 FORWARD LENGTH=327	e-113
assembly147_551bp	NoHits
assembly148_470bp	AT4G36740.1	Symbols: HB-5, ATHB40, HB40 | homeobox protein 40 | chr4:17314649-17316314 REVERSE LENGTH=216	1e-31
assembly149_362bp	AT1G21070.1	Symbols: | Nucleotide-sugar transporter family protein | chr1:7376148-7377810 REVERSE LENGTH=348	2e-11
assembly150_516bp	AT3G61510.1	Symbols: ACS1, AT-ACS1 | ACC synthase 1 | chr3:22763495-22765730 REVERSE LENGTH=488	2e-96
assembly151_359bp	NoHits
assembly152_447bp	NoHits
assembly153_623bp	AT1G10470.1	Symbols: ARR4, MEE7, ATRR1, IBC7 | response regulator 4 | chr1:3442624-3443759 REVERSE LENGTH=259	4e-31
assembly154_584bp	AT1G10470.1	Symbols: ARR4, MEE7, ATRR1, IBC7 | response regulator 4 | chr1:3442624-3443759 REVERSE LENGTH=259	5e-32
assembly155_928bp	AT5G25390.2	Symbols: SHN2 | Integrase-type DNA-binding superfamily protein | chr5:8820637-8821741 FORWARD LENGTH=189	6e-95
assembly156_312bp	NoHits
assembly157_371bp	NoHits
assembly158_483bp	AT5G18260.1	Symbols: | RING/U-box superfamily protein | chr5:6036226-6037295 REVERSE LENGTH=320	2e-26
assembly159_363bp	AT4G02850.1	Symbols: | phenazine biosynthesis PhzC/PhzF family protein | chr4:1266535-1268569 REVERSE LENGTH=306	1e-46
assembly160_393bp	AT4G10320.1	Symbols: | tRNA synthetase class I (I, L, M and V) family protein | chr4:6397526-6404509 REVERSE LENGTH=1190	1e-55
assembly161_470bp	AT5G23910.1	Symbols: | ATP binding microtubule motor family protein | chr5:8068452-8072723 FORWARD LENGTH=701	8e-70
assembly162_317bp	NoHits
assembly163_680bp	AT5G54760.1	Symbols: | Translation initiation factor SUI1 family protein | chr5:22244732-22245517 FORWARD LENGTH=113	6e-22
assembly164_1374bp	AT3G21790.1	Symbols: | UDP-Glycosyltransferase superfamily protein | chr3:7676927-7678414 REVERSE LENGTH=495	0
assembly165_316bp	NoHits
assembly166_321bp	AT3G11730.1	Symbols: ATFP8, ATRABD1, RABD1 | Ras-related small GTP-binding family protein | chr3:3709490-3711397 REVERSE LENGTH=205	4e-17
assembly167_327bp	AT2G22125.1	Symbols: CSI1 | binding | chr2:9406793-9414223 FORWARD LENGTH=2150	9e-06
assembly168_466bp	AT2G03020.1	Symbols: | Heat shock protein HSP20/alpha crystallin family | chr2:882927-884081 REVERSE LENGTH=255	9e-25
assembly169_534bp	AT2G44160.1	Symbols: MTHFR2 | methylenetetrahydrofolate reductase 2 | chr2:18262301-18265185 FORWARD LENGTH=594	e-119
assembly170_508bp	AT2G23950.1	Symbols: | Leucine-rich repeat protein kinase family protein | chr2:10187204-10189969 REVERSE LENGTH=634	6e-38
assembly171_676bp	AT3G12060.1	Symbols: TBL1 | Plant protein of unknown function (DUF828) | chr3:3843142-3845150 FORWARD LENGTH=556	5e-54
assembly172_559bp	AT5G27540.1	Symbols: MIRO1, emb2473 | MIRO-related GTP-ase 1 | chr5:9722816-9727112 FORWARD LENGTH=648	2e-58
assembly173_338bp	AT3G28940.1	Symbols: | AIG2-like (avirulence induced gene) family protein | chr3:10968324-10969311 REVERSE LENGTH=169	2e-12
assembly174_304bp	NoHits
assembly175_368bp	AT5G55630.1	Symbols: KCO1, TPK1, ATKCO1, ATTPK1 | Outward rectifying potassium channel protein | chr5:22531718-22532893 FORWARD LENGTH=363	9e-17
assembly176_329bp	NoHits
assembly177_412bp	NoHits
assembly178_369bp	NoHits
assembly179_339bp	NoHits
assembly180_360bp	AT5G46370.1	Symbols: KCO2, ATTPK2, ATKCO2 | Ca2+ activated outward rectifying K+ channel 2 | chr5:18809623-18811720 REVERSE LENGTH=443	6e-63
assembly181_363bp	NoHits
assembly182_300bp	NoHits
assembly183_356bp	AT5G67470.1	Symbols: ATFH6, FH6 | formin homolog 6 | chr5:26926835-26930212 FORWARD LENGTH=899	4e-27
assembly184_1815bp	AT5G44410.1	Symbols: | FAD-binding Berberine family protein | chr5:17891246-17892853 REVERSE LENGTH=535	0
assembly185_324bp	AT1G74410.1	Symbols: | RING/U-box superfamily protein | chr1:27965723-27967681 FORWARD LENGTH=223	9e-19
assembly186_396bp	AT1G68560.1	Symbols: ATXYL1, XYL1, TRG1 | alpha-xylosidase 1 | chr1:25734435-25737897 REVERSE LENGTH=915	3e-86
assembly187_707bp	AT1G28480.1	Symbols: GRX480, roxy19 | Thioredoxin superfamily protein | chr1:10013634-10014047 REVERSE LENGTH=137	1e-70
assembly188_325bp	NoHits
assembly189_301bp	NoHits
assembly190_915bp	AT5G05960.1	Symbols: | Bifunctional inhibitor/lipid-transfer protein/seed storage 2S albumin superfamily protein | chr5:1790256-1790694 FORWARD LENGTH=116	2e-70
assembly191_469bp	AT3G54400.1	Symbols: | Eukaryotic aspartyl protease family protein | chr3:20140291-20142599 REVERSE LENGTH=425	1e-29
assembly192_790bp	AT5G38310.1	Symbols: | unknown protein; Has 1807 Blast hits to 1807 proteins in 277 species: Archae - 0; Bacteria - 0; Metazoa - 736; Fungi - 347; Plants - 385; Viruses - 0; Other Eukaryotes - 339 (source: NCBI BLink). | chr5:15310681-15311247 REVERSE LENGTH=188	3e-92
assembly193_513bp	AT4G38940.1	Symbols: | Galactose oxidase/kelch repeat superfamily protein | chr4:18152848-18153960 FORWARD LENGTH=370	3e-14
assembly194_762bp	NoHits
assembly195_302bp	AT3G08760.1	Symbols: ATSIK | Protein kinase superfamily protein | chr3:2658129-2659984 REVERSE LENGTH=557	3e-08
assembly196_661bp	AT5G23610.2	Symbols: | INVOLVED IN: biological_process unknown; EXPRESSED IN: 24 plant structures; EXPRESSED DURING: 15 growth stages; BEST Arabidopsis thaliana protein match is: SWITCH1 (TAIR:AT5G51330.1); Has 173 Blast hits to 168 proteins in 34 species: Archae - 3; Bacteria - 10; Metazoa - 6; Fungi - 2; Plants - 115; Viruses - 0; Other Eukaryotes - 37 (source: NCBI BLink). | chr5:7957641-7959968 REVERSE L…	9e-24
assembly197_315bp	AT5G27700.1	Symbols: | Ribosomal protein S21e | chr5:9807541-9808048 REVERSE LENGTH=82	1e-22
assembly198_450bp	AT4G25260.1	Symbols: | Plant invertase/pectin methylesterase inhibitor superfamily protein | chr4:12936005-12936610 REVERSE LENGTH=201	4e-90
assembly199_492bp	AT3G62140.1	Symbols: | CONTAINS InterPro DOMAIN/s: NEFA-interacting nuclear protein NIP30, N-terminal (InterPro:IPR019331); Has 398 Blast hits to 395 proteins in 139 species: Archae - 0; Bacteria - 6; Metazoa - 193; Fungi - 83; Plants - 36; Viruses - 0; Other Eukaryotes - 80 (source: NCBI BLink). | chr3:23007277-23008626 FORWARD LENGTH=214	1e-40
assembly200_463bp	NoHits
assembly201_425bp	NoHits
assembly202_431bp	AT2G03340.1	Symbols: WRKY3 | WRKY DNA-binding protein 3 | chr2:1014724-1016936 REVERSE LENGTH=513	2e-62
assembly203_846bp	NoHits
assembly204_696bp	AT4G32750.1	Symbols: | unknown protein; Has 30201 Blast hits to 17322 proteins in 780 species: Archae - 12; Bacteria - 1396; Metazoa - 17338; Fungi - 3422; Plants - 5037; Viruses - 0; Other Eukaryotes - 2996 (source: NCBI BLink). | chr4:15796415-15798091 REVERSE LENGTH=293	2e-08
assembly205_510bp	NoHits
assembly206_518bp	AT2G36970.1	Symbols: | UDP-Glycosyltransferase superfamily protein | chr2:15529050-15530712 FORWARD LENGTH=490	2e-49
assembly207_572bp	AT4G23160.1	Symbols: CRK8 | cysteine-rich RLK (RECEPTOR-like protein kinase) 8 | chr4:12129485-12134086 FORWARD LENGTH=1262	2e-24
assembly208_522bp	AT3G16500.1	Symbols: PAP1, IAA26 | phytochrome-associated protein 1 | chr3:5612801-5614208 REVERSE LENGTH=269	7e-06
assembly209_1507bp	NoHits
assembly210_306bp	NoHits
assembly211_338bp	AT3G17820.1	Symbols: ATGSKB6, GLN1.3, GLN1;3 | glutamine synthetase 1.3 | chr3:6097503-6099408 FORWARD LENGTH=354	3e-12
assembly212_361bp	NoHits
assembly213_419bp	NoHits
assembly214_544bp	AT3G17970.1	Symbols: atToc64-III, TOC64-III | translocon at the outer membrane of chloroplasts 64-III | chr3:6148030-6151794 FORWARD LENGTH=589	1e-97
assembly215_435bp	AT5G61780.1	Symbols: Tudor2, AtTudor2, TSN2 | TUDOR-SN protein 2 | chr5:24822012-24826641 FORWARD LENGTH=985	8e-27
assembly216_416bp	AT1G55330.1	Symbols: AGP21, ATAGP21 | arabinogalactan protein 21 | chr1:20648634-20648810 REVERSE LENGTH=58	2e-16
assembly217_408bp	AT1G21010.1	Symbols: | unknown protein; FUNCTIONS IN: molecular_function unknown; INVOLVED IN: N-terminal protein myristoylation; LOCATED IN: cellular_component unknown; EXPRESSED IN: 24 plant structures; EXPRESSED DURING: 14 growth stages; BEST Arabidopsis thaliana protein match is: unknown protein (TAIR:AT1G76600.1); Has 206 Blast hits to 206 proteins in 13 species: Archae - 0; Bacteria - 0; Metazoa - 0; F…	4e-34
assembly218_658bp	AT1G78150.3	Symbols: | unknown protein; FUNCTIONS IN: molecular_function unknown; INVOLVED IN: biological_process unknown; EXPRESSED IN: 23 plant structures; EXPRESSED DURING: 13 growth stages; BEST Arabidopsis thaliana protein match is: unknown protein (TAIR:AT1G35780.1). | chr1:29404996-29406341 FORWARD LENGTH=303	4e-10
assembly219_435bp	AT4G29840.1	Symbols: MTO2, TS | Pyridoxal-5'-phosphate-dependent enzyme family protein | chr4:14599434-14601014 REVERSE LENGTH=526	6e-91
assembly220_417bp	NoHits
assembly221_612bp	AT4G22010.1	Symbols: sks4 | SKU5 similar 4 | chr4:11663429-11666463 FORWARD LENGTH=541	1e-12
assembly222_397bp	NoHits
assembly223_390bp	NoHits
assembly224_498bp	NoHits
assembly225_307bp	NoHits
assembly226_608bp	AT1G72340.1	Symbols: | NagB/RpiA/CoA transferase-like superfamily protein | chr1:27236898-27238482 FORWARD LENGTH=382	9e-21
assembly227_392bp	AT3G03050.1	Symbols: CSLD3, KJK, ATCSLD3 | cellulose synthase-like D3 | chr3:687873-691629 FORWARD LENGTH=1145	5e-42
assembly228_395bp	AT1G50080.1	Symbols: | BEST Arabidopsis thaliana protein match is: RNA-directed DNA polymerase (reverse transcriptase)-related family protein (TAIR:AT1G60720.1); Has 42 Blast hits to 42 proteins in 4 species: Archae - 0; Bacteria - 0; Metazoa - 0; Fungi - 0; Plants - 42; Viruses - 0; Other Eukaryotes - 0 (source: NCBI BLink). | chr1:18554001-18554276 REVERSE LENGTH=91	2e-08
assembly229_468bp	AT1G67830.1	Symbols: ATFXG1, FXG1 | alpha-fucosidase 1 | chr1:25431705-25432972 REVERSE LENGTH=372	5e-09
assembly230_325bp	AT2G27120.1	Symbols: POL2B, TIL2 | DNA polymerase epsilon catalytic subunit | chr2:11581223-11594346 FORWARD LENGTH=2138	7e-09
assembly231_485bp	AT4G33200.1	Symbols: XI-I, ATXI-I, XI-15 | myosin, putative | chr4:16002768-16014792 REVERSE LENGTH=1522	8e-10
assembly232_518bp	AT2G24810.1	Symbols: | Pathogenesis-related thaumatin superfamily protein | chr2:10573862-10574699 FORWARD LENGTH=193	5e-13
assembly233_381bp	AT5G07010.1	Symbols: ATST2A, ST2A | sulfotransferase 2A | chr5:2174960-2176039 REVERSE LENGTH=359	7e-32
assembly234_462bp	AT2G15180.1	Symbols: | Zinc knuckle (CCHC-type) family protein | chr2:6588743-6590167 REVERSE LENGTH=474	9e-09
assembly235_343bp	AT2G36590.1	Symbols: ProT3, ATPROT3 | proline transporter 3 | chr2:15343122-15345167 REVERSE LENGTH=436	5e-06
assembly236_328bp	AT1G51710.1	Symbols: UBP6, ATUBP6 | ubiquitin-specific protease 6 | chr1:19175805-19179894 REVERSE LENGTH=482	5e-11
assembly237_364bp	AT5G47550.1	Symbols: | Cystatin/monellin superfamily protein | chr5:19286596-19286964 REVERSE LENGTH=122	6e-35
assembly238_343bp	AT1G01310.1	Symbols: | CAP (Cysteine-rich secretory proteins, Antigen 5, and Pathogenesis-related 1 protein) superfamily protein | chr1:120221-120946 FORWARD LENGTH=241	2e-41
assembly239_370bp	NoHits
assembly240_453bp	NoHits
assembly241_383bp	AT5G61530.1	Symbols: | small G protein family protein / RhoGAP family protein | chr5:24742630-24744586 FORWARD LENGTH=376	2e-14
assembly242_337bp	AT5G16690.1	Symbols: ORC3, ATORC3 | origin recognition complex subunit 3 | chr5:5474410-5479878 FORWARD LENGTH=734	8e-12
assembly243_688bp	NoHits
assembly244_375bp	AT5G18350.1	Symbols: | Disease resistance protein (TIR-NBS-LRR class) family | chr5:6074069-6078569 REVERSE LENGTH=1245	3e-28
assembly245_404bp	AT1G21750.1	Symbols: ATPDIL1-1, ATPDI5, PDI5, PDIL1-1 | PDI-like 1-1 | chr1:7645767-7648514 FORWARD LENGTH=501	5e-10
assembly246_559bp	AT4G25660.1	Symbols: | PPPDE putative thiol peptidase family protein | chr4:13083677-13084989 FORWARD LENGTH=255	3e-09
assembly247_416bp	AT4G23310.1	Symbols: CRK23 | cysteine-rich RLK (RECEPTOR-like protein kinase) 23 | chr4:12185737-12188763 FORWARD LENGTH=830	1e-28
assembly248_412bp	NoHits
assembly249_734bp	AT3G02645.1	Symbols: | Plant protein of unknown function (DUF247) | chr3:566271-567860 FORWARD LENGTH=529	e-129
assembly250_499bp	AT1G22990.1	Symbols: HIPP22 | Heavy metal transport/detoxification superfamily protein | chr1:8139221-8140045 FORWARD LENGTH=152	e-105
assembly251_329bp	NoHits
assembly252_423bp	AT5G23450.3	Symbols: ATLCBK1, LCBK1 | long-chain base (LCB) kinase 1 | chr5:7905041-7908960 REVERSE LENGTH=778	2e-22
assembly253_355bp	ATMG00310.1	Symbols: ORF154 | RNA-directed DNA polymerase (reverse transcriptase)-related family protein | chrM:90883-91347 REVERSE LENGTH=154	1e-08
assembly254_308bp	AT3G18630.1	Symbols: ATUNG, UNG | uracil dna glycosylase | chr3:6411325-6413002 REVERSE LENGTH=330	8e-08
assembly255_498bp	NoHits
assembly256_446bp	NoHits
assembly257_351bp	AT5G11490.2	Symbols: | adaptin family protein | chr5:3671964-3676263 FORWARD LENGTH=850	8e-09
assembly258_509bp	AT5G11490.2	Symbols: | adaptin family protein | chr5:3671964-3676263 FORWARD LENGTH=850	2e-08
assembly259_494bp	AT1G33140.1	Symbols: PGY2 | Ribosomal protein L6 family | chr1:12023360-12024502 FORWARD LENGTH=194	1e-46
assembly260_445bp	AT5G16680.1	Symbols: | RING/FYVE/PHD zinc finger superfamily protein | chr5:5467534-5472956 REVERSE LENGTH=1311	4e-64
assembly261_353bp	AT3G02200.2	Symbols: | Proteasome component (PCI) domain protein | chr3:406692-408919 FORWARD LENGTH=417	2e-24
assembly262_304bp	NoHits
assembly263_443bp	AT1G10000.1	Symbols: | Ribonuclease H-like superfamily protein | chr1:3263877-3264788 REVERSE LENGTH=303	3e-17
assembly264_464bp	AT1G20480.1	Symbols: | AMP-dependent synthetase and ligase family protein | chr1:7094978-7097073 REVERSE LENGTH=565	6e-49
assembly265_381bp	AT3G13300.1	Symbols: VCS | Transducin/WD40 repeat-like superfamily protein | chr3:4304085-4309949 FORWARD LENGTH=1344	4e-09
assembly266_569bp	NoHits
assembly267_440bp	AT1G47570.1	Symbols: | RING/U-box superfamily protein | chr1:17478919-17483229 FORWARD LENGTH=466	6e-07
assembly268_315bp	NoHits
assembly269_430bp	AT5G61660.1	Symbols: | glycine-rich protein | chr5:24779458-24779862 REVERSE LENGTH=134	5e-26
assembly270_443bp	NoHits
assembly271_448bp	NoHits
assembly272_453bp	AT5G16390.1	Symbols: CAC1, CAC1A, BCCP, BCCP1 | chloroplastic acetylcoenzyme A carboxylase 1 | chr5:5361098-5363020 REVERSE LENGTH=280	2e-09
assembly273_411bp	AT2G26680.1	Symbols: | CONTAINS InterPro DOMAIN/s: Methyltransferase FkbM (InterPro:IPR006342); Has 1073 Blast hits to 1073 proteins in 243 species: Archae - 45; Bacteria - 509; Metazoa - 0; Fungi - 4; Plants - 60; Viruses - 4; Other Eukaryotes - 451 (source: NCBI BLink). | chr2:11344003-11345288 REVERSE LENGTH=319	4e-07
assembly274_356bp	NoHits
assembly275_372bp	AT4G12410.1	Symbols: | SAUR-like auxin-responsive protein family | chr4:7342956-7343429 REVERSE LENGTH=157	3e-22
assembly276_398bp	AT3G50130.1	Symbols: | Plant protein of unknown function (DUF247) | chr3:18589111-18591222 REVERSE LENGTH=564	3e-73
assembly277_471bp	AT4G21450.3	Symbols: | PapD-like superfamily protein | chr4:11426136-11428125 FORWARD LENGTH=314	4e-74
assembly278_333bp	AT5G25270.1	Symbols: | Ubiquitin-like superfamily protein | chr5:8757577-8762002 REVERSE LENGTH=658	3e-08
assembly279_426bp	AT1G26330.2	Symbols: | DNA binding | chr1:9107625-9113520 FORWARD LENGTH=1194	2e-06
assembly280_583bp	NoHits
assembly281_385bp	AT1G66980.1	Symbols: SNC4 | suppressor of npr1-1 constitutive 4 | chr1:24997491-25001961 REVERSE LENGTH=1118	1e-13
assembly282_962bp	AT1G04210.1	Symbols: | Leucine-rich repeat protein kinase family protein | chr1:1114696-1119383 FORWARD LENGTH=1112	4e-80
assembly283_406bp	NoHits
assembly284_368bp	AT1G72730.1	Symbols: | DEA(D/H)-box RNA helicase family protein | chr1:27378040-27379593 REVERSE LENGTH=414	4e-07
assembly285_339bp	NoHits
assembly286_512bp	AT2G45910.1	Symbols: | U-box domain-containing protein kinase family protein | chr2:18894520-18898212 FORWARD LENGTH=834	e-108
assembly287_331bp	AT1G27330.1	Symbols: | Ribosome associated membrane protein RAMP4 | chr1:9493064-9493898 FORWARD LENGTH=68	2e-20
assembly288_487bp	AT2G28660.1	Symbols: | Chloroplast-targeted copper chaperone protein | chr2:12295419-12296944 FORWARD LENGTH=265	5e-07
assembly289_519bp	AT3G30300.1	Symbols: | O-fucosyltransferase family protein | chr3:11921390-11924254 REVERSE LENGTH=677	1e-08
assembly290_328bp	AT4G01230.1	Symbols: | Reticulon family protein | chr4:516264-517408 REVERSE LENGTH=242	6e-29
assembly291_335bp	AT2G44120.2	Symbols: | Ribosomal protein L30/L7 family protein | chr2:18249227-18250417 REVERSE LENGTH=247	2e-24
assembly292_447bp	AT1G67330.1	Symbols: | Protein of unknown function (DUF579) | chr1:25214118-25214993 FORWARD LENGTH=291	1e-46
assembly293_344bp	NoHits
assembly294_411bp	AT5G14680.1	Symbols: | Adenine nucleotide alpha hydrolases-like superfamily protein | chr5:4731620-4733025 REVERSE LENGTH=175	1e-10
assembly295_525bp	NoHits
assembly296_334bp	NoHits
assembly297_451bp	AT3G13320.1	Symbols: CAX2, atcax2 | cation exchanger 2 | chr3:4315418-4317997 FORWARD LENGTH=441	2e-15
assembly298_401bp	AT2G40920.1	Symbols: | F-box and associated interaction domains-containing protein | chr2:17072586-17074012 REVERSE LENGTH=436	7e-13
assembly299_323bp	AT4G29905.1	Symbols: | unknown protein; BEST Arabidopsis thaliana protein match is: unknown protein (TAIR:AT5G57123.1); Has 73 Blast hits to 73 proteins in 13 species: Archae - 0; Bacteria - 0; Metazoa - 0; Fungi - 0; Plants - 73; Viruses - 0; Other Eukaryotes - 0 (source: NCBI BLink). | chr4:14627227-14627430 REVERSE LENGTH=67	8e-24
assembly300_384bp	AT3G18524.1	Symbols: MSH2, ATMSH2 | MUTS homolog 2 | chr3:6368151-6372409 REVERSE LENGTH=937	3e-15
assembly301_470bp	AT4G34640.1	Symbols: SQS1, ERG9 | squalene synthase 1 | chr4:16538489-16541655 FORWARD LENGTH=410	2e-09
assembly302_327bp	NoHits
assembly303_340bp	AT1G61580.1	Symbols: RPL3B, ARP2 | R-protein L3 B | chr1:22720833-22722402 REVERSE LENGTH=390	5e-32
assembly304_485bp	AT3G15640.1	Symbols: | Rubredoxin-like superfamily protein | chr3:5299273-5301371 FORWARD LENGTH=176	8e-37
assembly305_564bp	AT2G38120.1	Symbols: AUX1, WAV5, PIR1, MAP1 | Transmembrane amino acid transporter family protein | chr2:15973493-15976792 FORWARD LENGTH=485	3e-06
assembly306_558bp	NoHits
assembly307_575bp	AT5G01750.2	Symbols: | Protein of unknown function (DUF567) | chr5:290034-291109 FORWARD LENGTH=217	5e-11
assembly308_513bp	NoHits
assembly309_377bp	NoHits
assembly310_305bp	NoHits
assembly311_342bp	NoHits
assembly312_335bp	NoHits
assembly313_524bp	AT4G23160.1	Symbols: CRK8 | cysteine-rich RLK (RECEPTOR-like protein kinase) 8 | chr4:12129485-12134086 FORWARD LENGTH=1262	2e-38
assembly314_341bp	NoHits
assembly315_854bp	AT3G55470.1	Symbols: | Calcium-dependent lipid-binding (CaLB domain) family protein | chr3:20564356-20566092 FORWARD LENGTH=156	4e-12
assembly316_341bp	AT3G04500.1	Symbols: | RNA-binding (RRM/RBD/RNP motifs) family protein | chr3:1212065-1213795 REVERSE LENGTH=245	5e-12
assembly317_335bp	NoHits
assembly318_325bp	AT5G37370.1	Symbols: ATSRL1 | PRP38 family protein | chr5:14812845-14815988 REVERSE LENGTH=393	8e-09
assembly319_486bp	NoHits
assembly320_355bp	AT5G16070.1	Symbols: | TCP-1/cpn60 chaperonin family protein | chr5:5247549-5251050 REVERSE LENGTH=535	1e-09
assembly321_387bp	NoHits
assembly322_356bp	AT5G14620.1	Symbols: DRM2, DMT7 | domains rearranged methyltransferase 2 | chr5:4715429-4718578 REVERSE LENGTH=626	5e-58
assembly323_359bp	NoHits
assembly324_413bp	AT5G55190.1	Symbols: RAN3, ATRAN3 | RAN GTPase 3 | chr5:22392285-22393957 FORWARD LENGTH=221	4e-15
assembly325_370bp	AT3G06720.1	Symbols: AT-IMP, ATKAP ALPHA, AIMP ALPHA, IMPA-1, IMPA1 | importin alpha isoform 1 | chr3:2120559-2123555 FORWARD LENGTH=532	6e-29
assembly326_930bp	AT3G53190.1	Symbols: | Pectin lyase-like superfamily protein | chr3:19714171-19717537 FORWARD LENGTH=483	2e-06
assembly327_522bp	AT1G65340.1	Symbols: CYP96A3 | cytochrome P450, family 96, subfamily A, polypeptide 3 | chr1:24268135-24269646 REVERSE LENGTH=503	2e-83
assembly328_697bp	AT3G15890.1	Symbols: | Protein kinase superfamily protein | chr3:5374389-5376114 FORWARD LENGTH=361	3e-80
assembly329_393bp	NoHits
assembly330_576bp	NoHits
assembly331_771bp	AT2G21520.2	Symbols: | Sec14p-like phosphatidylinositol transfer family protein | chr2:9215956-9218953 FORWARD LENGTH=637	5e-23
assembly332_406bp	NoHits
assembly333_336bp	AT5G55700.1	Symbols: BMY6, BAM4 | beta-amylase 4 | chr5:22551873-22554702 FORWARD LENGTH=531	1e-48
assembly334_701bp	AT5G66900.1	Symbols: | Disease resistance protein (CC-NBS-LRR class) family | chr5:26714931-26717757 REVERSE LENGTH=809	3e-80
assembly335_357bp	NoHits
assembly336_581bp	AT5G54730.1	Symbols: ATATG18F, ATG18F, G18F | homolog of yeast autophagy 18 (ATG18) F | chr5:22233977-22236804 REVERSE LENGTH=763	3e-20
assembly337_546bp	AT2G24630.1	Symbols: ATCSLC08, CSLC08, ATCSLC8 | Glycosyl transferase family 2 protein | chr2:10471558-10473984 REVERSE LENGTH=690	5e-38
assembly338_351bp	NoHits
assembly339_315bp	NoHits
assembly340_374bp	AT5G45430.1	Symbols: | Protein kinase superfamily protein | chr5:18409200-18411711 FORWARD LENGTH=499	3e-11
assembly341_715bp	AT2G25565.1	Symbols: | BEST Arabidopsis thaliana protein match is: Zinc finger, C3HC4 type (RING finger) family protein (TAIR:AT2G24480.1); Has 27 Blast hits to 27 proteins in 3 species: Archae - 0; Bacteria - 0; Metazoa - 0; Fungi - 0; Plants - 27; Viruses - 0; Other Eukaryotes - 0 (source: NCBI BLink). | chr2:10884062-10885295 REVERSE LENGTH=206	7e-29
assembly342_328bp	NoHits
assembly343_694bp	AT4G34390.1	Symbols: XLG2 | extra-large GTP-binding protein 2 | chr4:16441579-16444840 FORWARD LENGTH=861	e-100
assembly344_332bp	NoHits
assembly345_478bp	NoHits
assembly346_404bp	NoHits
assembly347_348bp	AT1G63105.1	Symbols: | unknown protein; Has 54 Blast hits to 54 proteins in 32 species: Archae - 0; Bacteria - 30; Metazoa - 2; Fungi - 2; Plants - 3; Viruses - 0; Other Eukaryotes - 17 (source: NCBI BLink). | chr1:23404141-23404509 FORWARD LENGTH=122	5e-10
assembly348_553bp	AT1G16710.1	Symbols: HAC12 | histone acetyltransferase of the CBP family 12 | chr1:5714692-5721782 FORWARD LENGTH=1706	3e-11
assembly349_471bp	NoHits
assembly350_338bp	AT2G45190.1	Symbols: AFO, FIL, YAB1 | Plant-specific transcription factor YABBY family protein | chr2:18628450-18630552 REVERSE LENGTH=229	2e-09
assembly351_587bp	NoHits
assembly352_380bp	NoHits
assembly353_574bp	ATMG00310.1	Symbols: ORF154 | RNA-directed DNA polymerase (reverse transcriptase)-related family protein | chrM:90883-91347 REVERSE LENGTH=154	2e-40
assembly354_611bp	NoHits
assembly355_377bp	NoHits
assembly356_778bp	NoHits
assembly357_584bp	NoHits
assembly358_361bp	AT2G17890.1	Symbols: CPK16 | calcium-dependent protein kinase 16 | chr2:7769885-7772627 REVERSE LENGTH=571	1e-13
assembly359_760bp	AT3G44610.1	Symbols: | Protein kinase superfamily protein | chr3:16188266-16192107 REVERSE LENGTH=451	3e-06
assembly360_306bp	AT4G27900.1	Symbols: | CCT motif family protein | chr4:13890858-13892777 FORWARD LENGTH=261	8e-09
assembly361_397bp	AT3G14940.1	Symbols: ATPPC3, PPC3 | phosphoenolpyruvate carboxylase 3 | chr3:5025584-5029476 FORWARD LENGTH=968	1e-77
assembly362_325bp	NoHits
assembly363_313bp	NoHits
assembly364_340bp	AT4G32480.1	Symbols: | Protein of unknown function (DUF506) | chr4:15676488-15677776 FORWARD LENGTH=287	5e-34
assembly365_644bp	NoHits
assembly366_458bp	AT2G32880.1	Symbols: | TRAF-like family protein | chr2:13948953-13950505 REVERSE LENGTH=318	3e-32
assembly367_565bp	NoHits
assembly368_350bp	AT1G34130.1	Symbols: STT3B | staurosporin and temperature sensitive 3-like b | chr1:12430000-12432985 FORWARD LENGTH=735	2e-11
assembly369_550bp	AT3G59530.1	Symbols: LAP3 | Calcium-dependent phosphotriesterase superfamily protein | chr3:21993710-21995164 FORWARD LENGTH=403	e-108
assembly370_502bp	NoHits
assembly371_356bp	AT2G34440.1	Symbols: AGL29 | AGAMOUS-like 29 | chr2:14526950-14527468 FORWARD LENGTH=172	9e-49
assembly372_407bp	AT1G27870.1	Symbols: | Polynucleotidyl transferase, ribonuclease H-like superfamily protein | chr1:9706657-9707298 REVERSE LENGTH=213	2e-44
assembly373_527bp	NoHits
assembly374_377bp	NoHits
assembly375_462bp	NoHits
assembly376_313bp	NoHits
assembly377_340bp	AT4G19490.1	Symbols: ATVPS54, VPS54 | VPS54 | chr4:10616017-10622934 FORWARD LENGTH=1034	5e-10
assembly378_465bp	AT2G24680.2	Symbols: | transcriptional factor B3 family protein | chr2:10493467-10496733 REVERSE LENGTH=471	2e-13
assembly379_453bp	NoHits
assembly380_637bp	AT1G44835.2	Symbols: | YbaK/aminoacyl-tRNA synthetase-associated domain | chr1:16939909-16942337 FORWARD LENGTH=308	1e-27
assembly381_415bp	AT1G13180.1	Symbols: DIS1, ARP3, ATARP3 | Actin-like ATPase superfamily protein | chr1:4495394-4498204 FORWARD LENGTH=427	3e-19
assembly382_569bp	NoHits
assembly383_370bp	NoHits
assembly384_450bp	AT5G19520.1	Symbols: MSL9, ATMSL9 | mechanosensitive channel of small conductance-like 9 | chr5:6586079-6588771 FORWARD LENGTH=742	6e-41
assembly385_322bp	AT1G07985.1	Symbols: | Expressed protein | chr1:2475508-2475942 FORWARD LENGTH=144	2e-23
assembly386_430bp	AT5G39740.1	Symbols: OLI7, RPL5B | ribosomal protein L5 B | chr5:15903365-15905185 FORWARD LENGTH=301	2e-06
assembly387_347bp	AT4G25550.1	Symbols: | Cleavage/polyadenylation specificity factor, 25kDa subunit | chr4:13048519-13050873 FORWARD LENGTH=200	1e-32
assembly388_453bp	AT5G51860.1	Symbols: | K-box region and MADS-box transcription factor family protein | chr5:21081844-21084126 REVERSE LENGTH=211	7e-48
assembly389_331bp	AT3G12020.2	Symbols: | P-loop containing nucleoside triphosphate hydrolases superfamily protein | chr3:3827016-3834146 FORWARD LENGTH=1044	9e-26
assembly390_327bp	AT2G28620.1	Symbols: | P-loop containing nucleoside triphosphate hydrolases superfamily protein | chr2:12265167-12270020 REVERSE LENGTH=1042	3e-07
assembly391_410bp	AT3G12950.1	Symbols: | Trypsin family protein | chr3:4132798-4134818 REVERSE LENGTH=558	6e-09
assembly392_535bp	AT5G16400.1	Symbols: TRXF2, ATF2 | thioredoxin F2 | chr5:5363905-5365249 REVERSE LENGTH=185	9e-11
assembly393_308bp	AT1G35510.1	Symbols: | O-fucosyltransferase family protein | chr1:13071486-13074675 FORWARD LENGTH=568	2e-09
assembly394_389bp	NoHits
assembly395_312bp	NoHits
assembly396_331bp	AT5G11810.1	Symbols: | unknown protein; Has 1807 Blast hits to 1807 proteins in 277 species: Archae - 0; Bacteria - 0; Metazoa - 736; Fungi - 347; Plants - 385; Viruses - 0; Other Eukaryotes - 339 (source: NCBI BLink). | chr5:3808739-3810440 FORWARD LENGTH=306	6e-46
assembly397_312bp	NoHits
assembly398_414bp	NoHits
assembly399_315bp	NoHits
assembly400_343bp	NoHits
assembly401_341bp	AT1G10000.1	Symbols: | Ribonuclease H-like superfamily protein | chr1:3263877-3264788 REVERSE LENGTH=303	1e-13
assembly402_389bp	AT2G27600.1	Symbols: SKD1, VPS4, ATSKD1 | AAA-type ATPase family protein | chr2:11781226-11783730 FORWARD LENGTH=435	5e-24
assembly403_388bp	AT5G19530.1	Symbols: ACL5 | S-adenosyl-L-methionine-dependent methyltransferases superfamily protein | chr5:6589176-6591091 REVERSE LENGTH=339	2e-23
assembly404_340bp	NoHits
assembly405_495bp	AT5G02380.1	Symbols: MT2B | metallothionein 2B | chr5:506755-507164 REVERSE LENGTH=77	2e-10
assembly406_416bp	AT5G25910.1	Symbols: AtRLP52, RLP52 | receptor like protein 52 | chr5:9038860-9041377 FORWARD LENGTH=811	1e-29
assembly407_335bp	NoHits
assembly408_393bp	AT3G58820.1	Symbols: | F-box/RNI-like superfamily protein | chr3:21752960-21754615 FORWARD LENGTH=413	4e-64
assembly409_454bp	NoHits
assembly410_411bp	AT1G05170.2	Symbols: | Galactosyltransferase family protein | chr1:1491460-1493931 REVERSE LENGTH=407	2e-06
assembly411_419bp	AT4G00480.2	Symbols: ATMYC1, myc1 | basic helix-loop-helix (bHLH) DNA-binding superfamily protein | chr4:216866-219684 REVERSE LENGTH=580	2e-08
assembly412_506bp	AT1G18460.1	Symbols: | alpha/beta-Hydrolases superfamily protein | chr1:6352682-6355971 FORWARD LENGTH=701	3e-84
assembly413_311bp	NoHits
assembly414_469bp	AT1G17380.1	Symbols: JAZ5, TIFY11A | jasmonate-zim-domain protein 5 | chr1:5955654-5957070 REVERSE LENGTH=274	3e-07
assembly415_360bp	AT1G13980.1	Symbols: GN, VAN7, EMB30 | sec7 domain-containing protein | chr1:4789587-4794397 FORWARD LENGTH=1451	6e-17
assembly416_498bp	AT2G33120.2	Symbols: SAR1, VAMP722, ATVAMP722 | synaptobrevin-related protein 1 | chr2:14043785-14045337 REVERSE LENGTH=229	5e-06
assembly417_337bp	NoHits
assembly418_737bp	AT3G22690.1	Symbols: | CONTAINS InterPro DOMAIN/s: Protein of unknown function DUF1685 (InterPro:IPR012881), Pentatricopeptide repeat (InterPro:IPR002885); BEST Arabidopsis thaliana protein match is: Tetratricopeptide repeat (TPR)-like superfamily protein (TAIR:AT2G29760.1); Has 49784 Blast hits to 14716 proteins in 280 species: Archae - 2; Bacteria - 10; Metazoa - 107; Fungi - 167; Plants - 48594; Viruses -…	e-105
assembly419_416bp	AT3G05100.1	Symbols: | S-adenosyl-L-methionine-dependent methyltransferases superfamily protein | chr3:1424155-1425667 FORWARD LENGTH=336	2e-95
assembly420_565bp	AT3G52300.1	Symbols: ATPQ | ATP synthase D chain, mitochondrial | chr3:19396689-19398119 FORWARD LENGTH=168	4e-11
assembly421_328bp	NoHits
assembly422_385bp	NoHits
assembly423_493bp	AT1G14455.1	Symbols: | unknown protein; FUNCTIONS IN: molecular_function unknown; INVOLVED IN: biological_process unknown; LOCATED IN: endomembrane system; Has 30201 Blast hits to 17322 proteins in 780 species: Archae - 12; Bacteria - 1396; Metazoa - 17338; Fungi - 3422; Plants - 5037; Viruses - 0; Other Eukaryotes - 2996 (source: NCBI BLink). | chr1:4947985-4948278 REVERSE LENGTH=97	8e-08
assembly424_462bp	AT2G17250.1	Symbols: EMB2762 | CCAAT-binding factor | chr2:7499573-7502957 FORWARD LENGTH=577	9e-29
assembly425_339bp	AT4G14716.1	Symbols: ATARD1, ARD1 | acireductone dioxygenase 1 | chr4:8430484-8431867 REVERSE LENGTH=192	9e-12
assembly426_344bp	AT3G19820.1	Symbols: DWF1, DIM, EVE1, DIM1, CBB1 | cell elongation protein / DWARF1 / DIMINUTO (DIM) | chr3:6879835-6881616 REVERSE LENGTH=561	9e-08
assembly427_553bp	NoHits
assembly428_377bp	NoHits
assembly429_506bp	AT2G42960.1	Symbols: | Protein kinase superfamily protein | chr2:17868597-17870630 REVERSE LENGTH=494	9e-10
assembly430_593bp	AT2G42960.1	Symbols: | Protein kinase superfamily protein | chr2:17868597-17870630 REVERSE LENGTH=494	2e-09
assembly431_526bp	AT3G21865.1	Symbols: PEX22 | peroxin 22 | chr3:7701308-7703218 REVERSE LENGTH=283	2e-08
assembly432_1042bp	AT5G56940.1	Symbols: | Ribosomal protein S16 family protein | chr5:23030879-23032200 FORWARD LENGTH=135	4e-07
assembly433_462bp	NoHits
assembly434_412bp	AT1G10350.1	Symbols: | DNAJ heat shock family protein | chr1:3393595-3394860 REVERSE LENGTH=349	9e-10
assembly435_3942bp	AT4G23160.1	Symbols: CRK8 | cysteine-rich RLK (RECEPTOR-like protein kinase) 8 | chr4:12129485-12134086 FORWARD LENGTH=1262	5e-30
assembly436_349bp	AT1G56060.1	Symbols: | unknown protein; BEST Arabidopsis thaliana protein match is: unknown protein (TAIR:AT2G32210.1); Has 180 Blast hits to 180 proteins in 22 species: Archae - 0; Bacteria - 0; Metazoa - 0; Fungi - 10; Plants - 170; Viruses - 0; Other Eukaryotes - 0 (source: NCBI BLink). | chr1:20966737-20967133 REVERSE LENGTH=71	5e-37
assembly437_363bp	AT2G47310.1	Symbols: | flowering time control protein-related / FCA gamma-related | chr2:19423791-19426846 FORWARD LENGTH=512	8e-08
assembly438_419bp	AT1G22620.1	Symbols: ATSAC1 | Phosphoinositide phosphatase family protein | chr1:7997889-8002787 REVERSE LENGTH=912	5e-15
assembly439_704bp	AT1G52760.1	Symbols: LysoPL2 | lysophospholipase 2 | chr1:19651378-19652576 FORWARD LENGTH=332	4e-07
assembly440_424bp	NoHits
assembly441_413bp	NoHits
assembly442_456bp	AT2G26350.1	Symbols: PEX10, ATPEX10 | peroxin 10 | chr2:11217767-11220415 REVERSE LENGTH=381	3e-07
assembly443_351bp	AT3G16630.1	Symbols: ATKINESIN-13A, KINESIN-13A | P-loop containing nucleoside triphosphate hydrolases superfamily protein | chr3:5662660-5667261 REVERSE LENGTH=794	5e-08
assembly444_302bp	AT1G33680.1	Symbols: | KH domain-containing protein | chr1:12204056-12208282 FORWARD LENGTH=763	1e-17
assembly445_339bp	AT2G45670.1	Symbols: | calcineurin B subunit-related | chr2:18815070-18818382 REVERSE LENGTH=539	7e-11
assembly446_400bp	NoHits
assembly447_316bp	NoHits
assembly448_1794bp	AT4G13330.1	Symbols: | S-adenosyl-L-methionine-dependent methyltransferases superfamily protein | chr4:7754248-7755837 REVERSE LENGTH=428	0
assembly449_411bp	AT4G39756.1	Symbols: | Galactose oxidase/kelch repeat superfamily protein | chr4:18441756-18442880 FORWARD LENGTH=374	2e-41
assembly450_566bp	AT3G18990.1	Symbols: VRN1, REM39 | AP2/B3-like transcriptional factor family protein | chr3:6549077-6551568 REVERSE LENGTH=341	2e-16
assembly451_1009bp	NoHits
assembly452_511bp	AT3G01015.1	Symbols: | TPX2 (targeting protein for Xklp2) protein family | chr3:1798-4017 REVERSE LENGTH=488	3e-08
assembly453_372bp	AT1G49970.1	Symbols: CLPR1, NCLPP5, SVR2 | CLP protease proteolytic subunit 1 | chr1:18501936-18504462 REVERSE LENGTH=387	2e-11
assembly454_459bp	NoHits
assembly455_332bp	AT1G03060.1	Symbols: SPI | Beige/BEACH domain ;WD domain, G-beta repeat protein | chr1:712971-726891 REVERSE LENGTH=3601	3e-40
assembly456_412bp	AT3G04290.1	Symbols: ATLTL1, LTL1 | Li-tolerant lipase 1 | chr3:1133620-1136223 REVERSE LENGTH=366	2e-09
assembly457_303bp	AT5G38820.1	Symbols: | Transmembrane amino acid transporter family protein | chr5:15543481-15545182 FORWARD LENGTH=456	3e-26
assembly458_963bp	AT4G24330.1	Symbols: | Protein of unknown function (DUF1682) | chr4:12603848-12606229 REVERSE LENGTH=478	6e-08
assembly459_435bp	AT1G20490.1	Symbols: | AMP-dependent synthetase and ligase family protein | chr1:7097958-7099672 REVERSE LENGTH=447	2e-64
assembly460_637bp	AT5G15120.1	Symbols: | Protein of unknown function (DUF1637) | chr5:4898814-4900351 FORWARD LENGTH=293	8e-08
assembly461_506bp	NoHits
assembly462_441bp	NoHits
assembly463_435bp	NoHits
assembly464_1350bp	AT5G48050.1	Symbols: | CONTAINS InterPro DOMAIN/s: Retrotransposon gag protein (InterPro:IPR005162); BEST Arabidopsis thaliana protein match is: unknown protein (TAIR:AT1G34070.1); Has 1807 Blast hits to 1807 proteins in 277 species: Archae - 0; Bacteria - 0; Metazoa - 736; Fungi - 347; Plants - 385; Viruses - 0; Other Eukaryotes - 339 (source: NCBI BLink). | chr5:19472661-19473770 REVERSE LENGTH=369	6e-20
assembly465_1261bp	AT5G48050.1	Symbols: | CONTAINS InterPro DOMAIN/s: Retrotransposon gag protein (InterPro:IPR005162); BEST Arabidopsis thaliana protein match is: unknown protein (TAIR:AT1G34070.1); Has 1807 Blast hits to 1807 proteins in 277 species: Archae - 0; Bacteria - 0; Metazoa - 736; Fungi - 347; Plants - 385; Viruses - 0; Other Eukaryotes - 339 (source: NCBI BLink). | chr5:19472661-19473770 REVERSE LENGTH=369	9e-08
assembly466_340bp	NoHits
assembly467_1908bp	AT3G19515.2	Symbols: | CONTAINS InterPro DOMAIN/s: Apoptosis inhibitory 5 (InterPro:IPR008383); BEST Arabidopsis thaliana protein match is: unknown protein (TAIR:AT1G23935.1); Has 546 Blast hits to 394 proteins in 84 species: Archae - 0; Bacteria - 3; Metazoa - 210; Fungi - 15; Plants - 143; Viruses - 0; Other Eukaryotes - 175 (source: NCBI BLink). | chr3:6766872-6771078 REVERSE LENGTH=805	9e-22
assembly468_320bp	NoHits
assembly469_449bp	AT3G13580.3	Symbols: | Ribosomal protein L30/L7 family protein | chr3:4433809-4435109 FORWARD LENGTH=244	4e-15
assembly470_1580bp	AT5G03760.1	Symbols: ATCSLA09, CSLA09, ATCSLA9, CSLA9, RAT4 | Nucleotide-diphospho-sugar transferases superfamily protein | chr5:985910-990087 REVERSE LENGTH=533	2e-08
assembly471_669bp	AT1G67740.1	Symbols: PSBY, YCF32 | photosystem II BY | chr1:25394429-25394998 REVERSE LENGTH=189	3e-50
assembly472_516bp	AT5G05930.1	Symbols: ATGC1, GC1 | guanylyl cyclase 1 | chr5:1780270-1782659 REVERSE LENGTH=274	5e-11
assembly473_397bp	NoHits
assembly474_338bp	AT1G49700.1	Symbols: | Plant protein 1589 of unknown function | chr1:18388792-18390496 REVERSE LENGTH=279	3e-06
assembly475_568bp	AT2G39310.1	Symbols: JAL22 | jacalin-related lectin 22 | chr2:16414262-16416323 REVERSE LENGTH=458	4e-09
assembly476_390bp	AT5G03560.2	Symbols: | Tetratricopeptide repeat (TPR)-like superfamily protein | chr5:901452-902719 REVERSE LENGTH=363	2e-08
assembly477_444bp	AT1G01320.1	Symbols: | Tetratricopeptide repeat (TPR)-like superfamily protein | chr1:121582-130099 REVERSE LENGTH=1797	3e-17
assembly478_762bp	AT2G20630.2	Symbols: PIA1 | PP2C induced by AVRRPM1 | chr2:8897335-8899648 REVERSE LENGTH=290	2e-07
assembly479_342bp	AT5G25770.3	Symbols: | alpha/beta-Hydrolases superfamily protein | chr5:8969308-8971806 REVERSE LENGTH=421	5e-65
assembly480_368bp	AT3G55320.1	Symbols: PGP20 | P-glycoprotein 20 | chr3:20507391-20513393 REVERSE LENGTH=1408	3e-13
assembly481_784bp	AT5G47690.3	Symbols: | binding | chr5:19317899-19327014 FORWARD LENGTH=1607	3e-21
assembly482_760bp	AT5G47690.3	Symbols: | binding | chr5:19317899-19327014 FORWARD LENGTH=1607	2e-21
assembly483_730bp	NoHits
assembly484_460bp	AT5G24450.1	Symbols: | Transcription factor IIIC, subunit 5 | chr5:8348780-8353130 FORWARD LENGTH=554	4e-10
assembly485_344bp	AT1G74510.2	Symbols: | Galactose oxidase/kelch repeat superfamily protein | chr1:28006065-28007420 FORWARD LENGTH=451	3e-77
assembly486_326bp	AT1G12930.1	Symbols: | ARM repeat superfamily protein | chr1:4398588-4405495 REVERSE LENGTH=1005	6e-10
assembly487_5710bp	AT1G55540.2	Symbols: emb1011 | Nuclear pore complex protein | chr1:20734759-20743049 REVERSE LENGTH=1819	0
assembly488_2771bp	AT5G25560.2	Symbols: | CHY-type/CTCHY-type/RING-type Zinc finger protein | chr5:8899486-8901453 FORWARD LENGTH=328	e-166
assembly489_511bp	NoHits
assembly490_1525bp	AT3G04960.3	Symbols: | Domain of unknown function (DUF3444) | chr3:1373819-1375769 FORWARD LENGTH=605	3e-82
assembly491_441bp	AT1G24160.1	Symbols: | unknown protein; BEST Arabidopsis thaliana protein match is: unknown protein (TAIR:AT1G70100.3); Has 5230 Blast hits to 4162 proteins in 477 species: Archae - 30; Bacteria - 540; Metazoa - 2022; Fungi - 429; Plants - 280; Viruses - 32; Other Eukaryotes - 1897 (source: NCBI BLink). | chr1:8553669-8555830 REVERSE LENGTH=540	1e-66
assembly492_392bp	AT3G13750.1	Symbols: BGAL1 | beta galactosidase 1 | chr3:4511192-4515756 FORWARD LENGTH=847	6e-12
assembly493_335bp	AT3G58500.1	Symbols: PP2A-4 | protein phosphatase 2A-4 | chr3:21635503-21638911 REVERSE LENGTH=313	3e-07
assembly494_529bp	AT5G59140.1	Symbols: | BTB/POZ domain-containing protein | chr5:23874696-23875631 REVERSE LENGTH=96	1e-08
assembly495_576bp	NoHits
assembly496_326bp	AT4G14710.5	Symbols: ATARD2 | RmlC-like cupins superfamily protein | chr4:8424897-8426174 REVERSE LENGTH=201	3e-59
assembly497_374bp	AT5G04410.1	Symbols: NAC2, anac078 | NAC domain containing protein 2 | chr5:1243980-1246416 FORWARD LENGTH=567	7e-32
assembly498_425bp	AT1G33240.1	Symbols: AT-GTL1, AT-GTL2, GTL1 | GT-2-like 1 | chr1:12051859-12054320 REVERSE LENGTH=669	3e-06
assembly499_397bp	AT5G25510.1	Symbols: | Protein phosphatase 2A regulatory B subunit family protein | chr5:8882728-8884325 REVERSE LENGTH=500	9e-81
assembly500_363bp	NoHits
assembly501_349bp	NoHits
assembly502_495bp	NoHits
assembly503_344bp	NoHits
assembly504_358bp	AT3G11510.1	Symbols: | Ribosomal protein S11 family protein | chr3:3623757-3624866 REVERSE LENGTH=150	8e-12
assembly505_460bp	AT2G45770.2	Symbols: CPFTSY | signal recognition particle receptor protein, chloroplast (FTSY) | chr2:18851248-18853402 FORWARD LENGTH=373	3e-09
assembly506_389bp	NoHits
assembly507_307bp	NoHits
assembly508_385bp	NoHits
assembly509_373bp	AT3G47570.1	Symbols: | Leucine-rich repeat protein kinase family protein | chr3:17527611-17530748 FORWARD LENGTH=1010	3e-41
assembly510_540bp	AT1G22740.1	Symbols: RAB7, ATRABG3B, RAB75, RABG3B | RAB GTPase homolog G3B | chr1:8049247-8050494 FORWARD LENGTH=203	1e-07
assembly511_461bp	AT5G55520.1	Symbols: | CONTAINS InterPro DOMAIN/s: Kinesin-related protein (InterPro:IPR010544); BEST Arabidopsis thaliana protein match is: unknown protein (TAIR:AT4G26660.1); Has 32425 Blast hits to 20462 proteins in 1550 species: Archae - 335; Bacteria - 3392; Metazoa - 16996; Fungi - 2645; Plants - 1561; Viruses - 54; Other Eukaryotes - 7442 (source: NCBI BLink). | chr5:22488205-22491187 REVERSE LENGTH=8…	3e-28
assembly512_394bp	NoHits
assembly513_384bp	NoHits
assembly514_306bp	AT1G43710.1	Symbols: emb1075 | Pyridoxal phosphate (PLP)-dependent transferases superfamily protein | chr1:16486534-16488298 REVERSE LENGTH=482	2e-13
assembly515_734bp	NoHits
assembly516_332bp	NoHits
assembly517_306bp	AT1G24330.1	Symbols: | ARM repeat superfamily protein | chr1:8631779-8634835 FORWARD LENGTH=771	2e-06
assembly518_527bp	AT1G18700.4	Symbols: | DNAJ heat shock N-terminal domain-containing protein | chr1:6437591-6443046 FORWARD LENGTH=715	8e-08
assembly519_317bp	NoHits
assembly520_392bp	NoHits
assembly521_524bp	NoHits
assembly522_363bp	AT1G55810.1	Symbols: UKL3 | uridine kinase-like 3 | chr1:20861273-20864003 FORWARD LENGTH=466	2e-07
assembly523_364bp	AT1G51340.2	Symbols: | MATE efflux family protein | chr1:19032021-19034681 FORWARD LENGTH=515	2e-22
assembly524_527bp	AT4G32330.1	Symbols: | TPX2 (targeting protein for Xklp2) protein family | chr4:15609801-15611867 FORWARD LENGTH=437	6e-85
assembly525_310bp	NoHits
assembly526_341bp	NoHits
assembly527_322bp	NoHits
assembly528_328bp	NoHits
assembly529_456bp	AT1G50500.2	Symbols: HIT1 | Membrane trafficking VPS53 family protein | chr1:18708217-18715597 REVERSE LENGTH=847	4e-07
assembly530_356bp	AT5G30510.1	Symbols: RPS1, ARRPS1 | ribosomal protein S1 | chr5:11619262-11621223 REVERSE LENGTH=416	1e-08
assembly531_343bp	AT1G28440.1	Symbols: HSL1 | HAESA-like 1 | chr1:9996914-10000171 FORWARD LENGTH=996	5e-14
assembly532_425bp	AT1G71940.2	Symbols: | SNARE associated Golgi protein family | chr1:27078781-27080191 FORWARD LENGTH=306	3e-39
assembly533_339bp	AT1G21410.1	Symbols: SKP2A | F-box/RNI-like superfamily protein | chr1:7497479-7499386 FORWARD LENGTH=360	1e-11
assembly534_301bp	NoHits
assembly535_325bp	AT1G47900.1	Symbols: | Plant protein of unknown function (DUF869) | chr1:17647340-17651035 REVERSE LENGTH=1054	1e-09
assembly536_357bp	AT1G05960.2	Symbols: | ARM repeat superfamily protein | chr1:1808478-1815060 REVERSE LENGTH=1003	1e-58
assembly537_345bp	NoHits
assembly538_316bp	AT1G20470.1	Symbols: | SAUR-like auxin-responsive protein family | chr1:7094325-7094765 FORWARD LENGTH=146	3e-16
assembly539_456bp	NoHits
assembly540_394bp	AT1G02090.1	Symbols: FUS5, CSN7, COP15, ATCSN7 | Proteasome component (PCI) domain protein | chr1:387479-389568 REVERSE LENGTH=260	1e-23
assembly541_432bp	NoHits
assembly542_342bp	AT2G44770.1	Symbols: | ELMO/CED-12 family protein | chr2:18457817-18459886 FORWARD LENGTH=266	1e-08
assembly543_323bp	NoHits
assembly544_401bp	NoHits
assembly545_335bp	NoHits
assembly546_315bp	NoHits
assembly547_335bp	NoHits
assembly548_312bp	NoHits
assembly549_356bp	AT2G27310.1	Symbols: | F-box family protein | chr2:11683954-11684967 REVERSE LENGTH=337	6e-43
assembly550_359bp	AT4G09320.1	Symbols: NDPK1 | Nucleoside diphosphate kinase family protein | chr4:5923424-5924366 FORWARD LENGTH=169	5e-52
assembly551_316bp	AT1G76780.1	Symbols: | HSP20-like chaperones superfamily protein | chr1:28816641-28822256 FORWARD LENGTH=1871	7e-12
assembly552_310bp	AT2G37970.1	Symbols: SOUL-1 | SOUL heme-binding family protein | chr2:15891027-15891704 FORWARD LENGTH=225	2e-48
assembly553_310bp	NoHits
assembly554_381bp	NoHits
assembly555_533bp	AT3G01520.1	Symbols: | Adenine nucleotide alpha hydrolases-like superfamily protein | chr3:208506-209921 FORWARD LENGTH=175	1e-11
assembly556_374bp	AT2G21230.3	Symbols: | Basic-leucine zipper (bZIP) transcription factor family protein | chr2:9093920-9096059 REVERSE LENGTH=525	3e-10
assembly557_301bp	AT1G50080.1	Symbols: | BEST Arabidopsis thaliana protein match is: RNA-directed DNA polymerase (reverse transcriptase)-related family protein (TAIR:AT1G60720.1); Has 42 Blast hits to 42 proteins in 4 species: Archae - 0; Bacteria - 0; Metazoa - 0; Fungi - 0; Plants - 42; Viruses - 0; Other Eukaryotes - 0 (source: NCBI BLink). | chr1:18554001-18554276 REVERSE LENGTH=91	8e-08
assembly558_315bp	AT5G30510.1	Symbols: RPS1, ARRPS1 | ribosomal protein S1 | chr5:11619262-11621223 REVERSE LENGTH=416	5e-11
assembly559_343bp	AT1G09300.1	Symbols: | Metallopeptidase M24 family protein | chr1:3003981-3008131 FORWARD LENGTH=493	1e-08
assembly560_312bp	AT3G01500.2	Symbols: CA1 | carbonic anhydrase 1 | chr3:194853-197873 REVERSE LENGTH=347	9e-21
assembly561_540bp	AT1G22410.1	Symbols: | Class-II DAHP synthetase family protein | chr1:7912120-7914742 FORWARD LENGTH=527	e-101
assembly562_391bp	AT3G09090.1	Symbols: DEX1 | defective in exine formation protein (DEX1) | chr3:2782912-2787552 REVERSE LENGTH=896	9e-27
assembly563_414bp	AT4G32800.1	Symbols: | Integrase-type DNA-binding superfamily protein | chr4:15819812-15820477 FORWARD LENGTH=221	5e-22
assembly564_434bp	AT4G13830.2	Symbols: J20 | DNAJ-like 20 | chr4:8011518-8012577 FORWARD LENGTH=197	6e-09
assembly565_364bp	AT1G79650.4	Symbols: RAD23B | Rad23 UV excision repair protein family | chr1:29972406-29975132 REVERSE LENGTH=395	7e-09
assembly566_325bp	NoHits
assembly567_447bp	AT4G31360.1	Symbols: | selenium binding | chr4:15221945-15223310 FORWARD LENGTH=186	2e-08
assembly568_403bp	AT5G25530.1	Symbols: | DNAJ heat shock family protein | chr5:8889665-8890954 REVERSE LENGTH=347	6e-17
assembly569_325bp	AT3G21260.3	Symbols: | Glycolipid transfer protein (GLTP) family protein | chr3:7464132-7465785 REVERSE LENGTH=233	9e-16
assembly570_351bp	AT5G14880.1	Symbols: | Potassium transporter family protein | chr5:4814244-4817667 FORWARD LENGTH=781	1e-63
assembly571_331bp	AT4G25010.1	Symbols: SWEET14, AtSWEET14 | Nodulin MtN3 family protein | chr4:12854630-12856351 REVERSE LENGTH=281	4e-63
assembly572_365bp	NoHits
assembly573_434bp	AT3G61415.1	Symbols: ASK21, SK21 | SKP1-like 21 | chr3:22722962-22725577 REVERSE LENGTH=351	6e-59
assembly574_332bp	NoHits
assembly575_314bp	AT3G25140.1	Symbols: GAUT8, QUA1 | Nucleotide-diphospho-sugar transferases superfamily protein | chr3:9154748-9156642 FORWARD LENGTH=559	4e-61
assembly576_448bp	AT3G30260.1	Symbols: AGL79 | AGAMOUS-like 79 | chr3:11909119-11912880 FORWARD LENGTH=249	2e-24
assembly577_454bp	AT1G61890.1	Symbols: | MATE efflux family protein | chr1:22868103-22871163 REVERSE LENGTH=501	6e-08
assembly578_443bp	ATMG00310.1	Symbols: ORF154 | RNA-directed DNA polymerase (reverse transcriptase)-related family protein | chrM:90883-91347 REVERSE LENGTH=154	7e-29
assembly579_493bp	NoHits
assembly580_426bp	NoHits
assembly581_469bp	AT1G50080.1	Symbols: | BEST Arabidopsis thaliana protein match is: RNA-directed DNA polymerase (reverse transcriptase)-related family protein (TAIR:AT1G60720.1); Has 42 Blast hits to 42 proteins in 4 species: Archae - 0; Bacteria - 0; Metazoa - 0; Fungi - 0; Plants - 42; Viruses - 0; Other Eukaryotes - 0 (source: NCBI BLink). | chr1:18554001-18554276 REVERSE LENGTH=91	8e-12
assembly582_651bp	AT1G30860.1	Symbols: | RING/U-box superfamily protein | chr1:10986696-10989246 REVERSE LENGTH=730	8e-62
assembly583_309bp	NoHits
assembly584_322bp	NoHits
assembly585_387bp	NoHits
assembly586_412bp	AT5G23050.1	Symbols: AAE17 | acyl-activating enzyme 17 | chr5:7731513-7735399 REVERSE LENGTH=721	3e-14
assembly587_351bp	AT1G06950.1	Symbols: ATTIC110, TIC110 | translocon at the inner envelope membrane of chloroplasts 110 | chr1:2130303-2135563 REVERSE LENGTH=1016	1e-06
assembly588_392bp	AT5G25360.1	Symbols: | unknown protein; BEST Arabidopsis thaliana protein match is: unknown protein (TAIR:AT4G32342.1); Has 1807 Blast hits to 1807 proteins in 277 species: Archae - 0; Bacteria - 0; Metazoa - 736; Fungi - 347; Plants - 385; Viruses - 0; Other Eukaryotes - 339 (source: NCBI BLink). | chr5:8799934-8802333 REVERSE LENGTH=169	1e-08
assembly589_394bp	AT1G30360.1	Symbols: ERD4 | Early-responsive to dehydration stress protein (ERD4) | chr1:10715892-10718799 FORWARD LENGTH=724	1e-25
assembly590_314bp	NoHits
assembly591_349bp	AT5G37190.1	Symbols: CIP4 | COP1-interacting protein 4 | chr5:14723362-14726694 REVERSE LENGTH=876	1e-10
assembly592_301bp	AT5G26180.1	Symbols: | S-adenosyl-L-methionine-dependent methyltransferases superfamily protein | chr5:9149253-9152595 FORWARD LENGTH=567	1e-08
assembly593_457bp	AT4G15410.1	Symbols: PUX5 | serine/threonine protein phosphatase 2A 55 kDa regulatory subunit B prime gamma | chr4:8814868-8816596 FORWARD LENGTH=421	4e-08
assembly594_331bp	NoHits
assembly595_767bp	AT2G31830.2	Symbols: | endonuclease/exonuclease/phosphatase family protein | chr2:13532737-13537665 REVERSE LENGTH=1173	e-145
assembly596_308bp	NoHits
assembly597_363bp	NoHits
assembly598_310bp	NoHits
assembly599_440bp	AT5G18880.1	Symbols: | RNA-directed DNA polymerase (reverse transcriptase)-related family protein | chr5:6300535-6301422 REVERSE LENGTH=295	6e-29
assembly600_345bp	AT2G36270.1	Symbols: ABI5, GIA1 | Basic-leucine zipper (bZIP) transcription factor family protein | chr2:15204980-15206571 REVERSE LENGTH=442	3e-49
assembly601_579bp	AT1G30700.1	Symbols: | FAD-binding Berberine family protein | chr1:10892623-10894437 FORWARD LENGTH=527	e-115
assembly602_318bp	AT1G13450.1	Symbols: GT-1 | Homeodomain-like superfamily protein | chr1:4612999-4615115 REVERSE LENGTH=406	5e-08
assembly603_393bp	NoHits
assembly604_600bp	AT5G45775.2	Symbols: | Ribosomal L5P family protein | chr5:18565281-18566496 REVERSE LENGTH=182	5e-12
assembly605_351bp	AT2G26480.1	Symbols: UGT76D1 | UDP-glucosyl transferase 76D1 | chr2:11263963-11265572 FORWARD LENGTH=452	8e-54
assembly606_381bp	AT5G54500.2	Symbols: FQR1 | flavodoxin-like quinone reductase 1 | chr5:22124674-22126435 FORWARD LENGTH=244	5e-06
assembly607_300bp	NoHits
assembly608_357bp	NoHits
assembly609_310bp	NoHits
assembly610_346bp	NoHits
assembly611_374bp	NoHits
assembly612_321bp	AT5G16310.1	Symbols: UCH1 | Peptidase C12, ubiquitin carboxyl-terminal hydrolase 1 | chr5:5342579-5344153 REVERSE LENGTH=334	5e-10
assembly613_334bp	AT5G66920.1	Symbols: sks17 | SKU5 similar 17 | chr5:26722963-26725370 FORWARD LENGTH=546	9e-31
assembly614_561bp	AT1G20840.1	Symbols: TMT1 | tonoplast monosaccharide transporter1 | chr1:7245107-7247674 REVERSE LENGTH=734	7e-57
assembly615_300bp	NoHits
assembly616_315bp	NoHits
assembly617_334bp	AT3G52590.1	Symbols: UBQ1, EMB2167, ERD16, HAP4 | ubiquitin extension protein 1 | chr3:19505668-19506681 FORWARD LENGTH=128	3e-07
assembly618_327bp	NoHits
assembly619_324bp	AT5G64330.1	Symbols: NPH3, RPT3, JK218 | Phototropic-responsive NPH3 family protein | chr5:25727568-25730225 FORWARD LENGTH=746	2e-24
assembly620_487bp	AT5G58610.1	Symbols: | PHD finger transcription factor, putative | chr5:23686771-23691053 REVERSE LENGTH=1065	3e-08
assembly621_401bp	NoHits
assembly622_459bp	AT2G37220.1	Symbols: | RNA-binding (RRM/RBD/RNP motifs) family protein | chr2:15634980-15636331 REVERSE LENGTH=289	7e-06
assembly623_376bp	AT3G03520.1	Symbols: NPC3 | non-specific phospholipase C3 | chr3:837972-840511 REVERSE LENGTH=523	1e-10
assembly624_400bp	AT5G52020.1	Symbols: | Integrase-type DNA-binding superfamily protein | chr5:21124192-21124890 REVERSE LENGTH=232	9e-53
assembly625_326bp	AT4G23160.1	Symbols: CRK8 | cysteine-rich RLK (RECEPTOR-like protein kinase) 8 | chr4:12129485-12134086 FORWARD LENGTH=1262	1e-21
assembly626_305bp	AT1G29180.1	Symbols: | Cysteine/Histidine-rich C1 domain family protein | chr1:10199628-10200962 FORWARD LENGTH=444	5e-11
assembly627_310bp	AT5G61790.1	Symbols: CNX1, ATCNX1 | calnexin 1 | chr5:24827394-24829642 REVERSE LENGTH=530	3e-31
assembly628_306bp	NoHits
assembly629_354bp	AT1G72000.1	Symbols: | Plant neutral invertase family protein | chr1:27103277-27105663 FORWARD LENGTH=499	5e-71
assembly630_359bp	NoHits
assembly631_388bp	AT4G14930.1	Symbols: | Survival protein SurE-like phosphatase/nucleotidase | chr4:8538831-8541205 FORWARD LENGTH=315	6e-46
assembly632_300bp	NoHits
assembly633_356bp	NoHits
assembly634_367bp	AT1G10760.1	Symbols: SEX1, SOP1, SOP, GWD1, GWD | Pyruvate phosphate dikinase, PEP/pyruvate binding domain | chr1:3581210-3590043 REVERSE LENGTH=1399	5e-06
assembly635_320bp	AT3G12040.1	Symbols: | DNA-3-methyladenine glycosylase (MAG) | chr3:3835349-3836781 REVERSE LENGTH=254	4e-06
assembly636_333bp	NoHits
assembly637_484bp	NoHits
assembly638_325bp	AT5G63460.4	Symbols: | SAP domain-containing protein | chr5:25413605-25415399 REVERSE LENGTH=174	7e-14
assembly639_313bp	NoHits
assembly640_469bp	AT3G22510.1	Symbols: | Pre-rRNA-processing protein TSR2, conserved region | chr3:7973544-7974087 FORWARD LENGTH=124	6e-13
assembly641_318bp	NoHits
assembly642_753bp	AT1G16710.1	Symbols: HAC12 | histone acetyltransferase of the CBP family 12 | chr1:5714692-5721782 FORWARD LENGTH=1706	3e-29
assembly643_308bp	AT5G23540.1	Symbols: | Mov34/MPN/PAD-1 family protein | chr5:7937772-7939339 FORWARD LENGTH=308	2e-08
assembly644_398bp	NoHits
assembly645_389bp	NoHits
assembly646_537bp	NoHits
assembly647_319bp	NoHits
assembly648_322bp	AT1G75520.1	Symbols: SRS5 | SHI-related sequence 5 | chr1:28351779-28353179 REVERSE LENGTH=346	3e-06
assembly649_528bp	NoHits
assembly650_358bp	AT5G05170.1	Symbols: CESA3, IXR1, ATCESA3, ATH-B, CEV1 | Cellulose synthase family protein | chr5:1530401-1535090 REVERSE LENGTH=1065	3e-63
assembly651_353bp	AT5G57480.1	Symbols: | P-loop containing nucleoside triphosphate hydrolases superfamily protein | chr5:23279406-23280968 REVERSE LENGTH=520	2e-76
assembly652_357bp	NoHits
assembly653_428bp	AT4G26780.1	Symbols: AR192 | Co-chaperone GrpE family protein | chr4:13485066-13486560 REVERSE LENGTH=327	5e-07
assembly654_1363bp	AT4G17960.1	Symbols: | unknown protein; BEST Arabidopsis thaliana protein match is: unknown protein (TAIR:AT5G46620.1); Has 46 Blast hits to 45 proteins in 13 species: Archae - 0; Bacteria - 0; Metazoa - 0; Fungi - 0; Plants - 46; Viruses - 0; Other Eukaryotes - 0 (source: NCBI BLink). | chr4:9971154-9972227 FORWARD LENGTH=154	2e-40
assembly655_839bp	AT4G17960.1	Symbols: | unknown protein; BEST Arabidopsis thaliana protein match is: unknown protein (TAIR:AT5G46620.1); Has 46 Blast hits to 45 proteins in 13 species: Archae - 0; Bacteria - 0; Metazoa - 0; Fungi - 0; Plants - 46; Viruses - 0; Other Eukaryotes - 0 (source: NCBI BLink). | chr4:9971154-9972227 FORWARD LENGTH=154	1e-86
assembly656_315bp	AT4G21670.1	Symbols: CPL1, FRY2, ATCPL1 | C-terminal domain phosphatase-like 1 | chr4:11511511-11516922 FORWARD LENGTH=967	7e-35
assembly657_1627bp	AT2G24850.1	Symbols: TAT3, TAT | tyrosine aminotransferase 3 | chr2:10583070-10585152 REVERSE LENGTH=445	0
assembly658_831bp	AT4G36540.1	Symbols: BEE2 | BR enhanced expression 2 | chr4:17243699-17244965 FORWARD LENGTH=304	6e-99
assembly659_578bp	NoHits
assembly660_846bp	AT1G65800.1	Symbols: ARK2, RK2 | receptor kinase 2 | chr1:24473166-24476523 FORWARD LENGTH=847	2e-11
assembly661_358bp	AT1G52700.1	Symbols: | alpha/beta-Hydrolases superfamily protein | chr1:19631186-19633366 REVERSE LENGTH=255	1e-14
assembly662_1398bp	AT1G47610.1	Symbols: | Transducin/WD40 repeat-like superfamily protein | chr1:17504836-17505891 FORWARD LENGTH=351	0
assembly663_1493bp	AT2G37380.1	Symbols: | unknown protein; BEST Arabidopsis thaliana protein match is: unknown protein (TAIR:AT2G39370.1); Has 1284 Blast hits to 422 proteins in 114 species: Archae - 0; Bacteria - 90; Metazoa - 125; Fungi - 151; Plants - 136; Viruses - 0; Other Eukaryotes - 782 (source: NCBI BLink). | chr2:15686828-15687793 FORWARD LENGTH=321	4e-75
assembly664_1276bp	AT2G37380.1	Symbols: | unknown protein; BEST Arabidopsis thaliana protein match is: unknown protein (TAIR:AT2G39370.1); Has 1284 Blast hits to 422 proteins in 114 species: Archae - 0; Bacteria - 90; Metazoa - 125; Fungi - 151; Plants - 136; Viruses - 0; Other Eukaryotes - 782 (source: NCBI BLink). | chr2:15686828-15687793 FORWARD LENGTH=321	7e-72
assembly665_972bp	AT4G10810.1	Symbols: | unknown protein; FUNCTIONS IN: molecular_function unknown; INVOLVED IN: biological_process unknown; LOCATED IN: chloroplast; EXPRESSED IN: 23 plant structures; EXPRESSED DURING: 15 growth stages; BEST Arabidopsis thaliana protein match is: unknown protein (TAIR:AT4G24026.1); Has 1807 Blast hits to 1807 proteins in 277 species: Archae - 0; Bacteria - 0; Metazoa - 736; Fungi - 347; Plant…	2e-18
assembly666_304bp	AT5G55520.1	Symbols: | CONTAINS InterPro DOMAIN/s: Kinesin-related protein (InterPro:IPR010544); BEST Arabidopsis thaliana protein match is: unknown protein (TAIR:AT4G26660.1); Has 32425 Blast hits to 20462 proteins in 1550 species: Archae - 335; Bacteria - 3392; Metazoa - 16996; Fungi - 2645; Plants - 1561; Viruses - 54; Other Eukaryotes - 7442 (source: NCBI BLink). | chr5:22488205-22491187 REVERSE LENGTH=8…	2e-43
assembly667_882bp	AT2G44130.1	Symbols: | Galactose oxidase/kelch repeat superfamily protein | chr2:18253731-18254960 FORWARD LENGTH=409	e-127
assembly668_742bp	AT4G34710.1	Symbols: ADC2, SPE2, ATADC2 | arginine decarboxylase 2 | chr4:16560315-16562450 REVERSE LENGTH=711	2e-73
assembly669_2948bp	AT3G46970.1	Symbols: ATPHS2, PHS2 | alpha-glucan phosphorylase 2 | chr3:17301625-17306111 REVERSE LENGTH=841	0
assembly670_1554bp	AT5G64420.1	Symbols: | DNA polymerase V family | chr5:25756416-25761122 FORWARD LENGTH=1306	e-171
assembly671_459bp	AT3G62260.2	Symbols: | Protein phosphatase 2C family protein | chr3:23038516-23040391 REVERSE LENGTH=384	7e-24
assembly672_702bp	AT3G62260.2	Symbols: | Protein phosphatase 2C family protein | chr3:23038516-23040391 REVERSE LENGTH=384	2e-14
assembly673_1090bp	AT1G71691.2	Symbols: | GDSL-like Lipase/Acylhydrolase superfamily protein | chr1:26949395-26951480 REVERSE LENGTH=384	0
assembly674_365bp	AT4G39070.1	Symbols: | B-box zinc finger family protein | chr4:18205061-18206421 REVERSE LENGTH=242	3e-74
assembly675_2008bp	AT1G43760.1	Symbols: | DNAse I-like superfamily protein | chr1:16528880-16531065 REVERSE LENGTH=626	2e-16
assembly676_717bp	AT3G53220.1	Symbols: | Thioredoxin superfamily protein | chr3:19722032-19722615 FORWARD LENGTH=126	1e-63
assembly677_409bp	NoHits
assembly678_318bp	NoHits
assembly679_520bp	AT5G13080.1	Symbols: WRKY75, ATWRKY75 | WRKY DNA-binding protein 75 | chr5:4149928-4151019 REVERSE LENGTH=145	6e-84
assembly680_333bp	AT1G62020.1	Symbols: | Coatomer, alpha subunit | chr1:22919814-22923728 FORWARD LENGTH=1216	7e-13
assembly681_311bp	AT1G62020.1	Symbols: | Coatomer, alpha subunit | chr1:22919814-22923728 FORWARD LENGTH=1216	5e-13
assembly682_744bp	NoHits
assembly683_419bp	AT4G14070.1	Symbols: AAE15 | acyl-activating enzyme 15 | chr4:8112122-8118039 REVERSE LENGTH=727	3e-10
assembly684_651bp	AT1G70300.1	Symbols: KUP6 | K+ uptake permease 6 | chr1:26477993-26481233 REVERSE LENGTH=782	6e-54
assembly685_335bp	AT5G59840.1	Symbols: | Ras-related small GTP-binding family protein | chr5:24107450-24109049 REVERSE LENGTH=216	6e-13
assembly686_516bp	NoHits
assembly687_357bp	AT4G33210.1	Symbols: SLOMO | F-box family protein | chr4:16015971-16020697 REVERSE LENGTH=990	1e-06
assembly688_631bp	AT2G22920.2	Symbols: SCPL12 | serine carboxypeptidase-like 12 | chr2:9753938-9757420 FORWARD LENGTH=435	e-108
assembly689_950bp	AT2G22970.3	Symbols: SCPL11 | serine carboxypeptidase-like 11 | chr2:9774875-9778255 FORWARD LENGTH=443	1e-51
assembly690_1143bp	AT2G33835.1	Symbols: FES1 | Zinc finger C-x8-C-x5-C-x3-H type family protein | chr2:14312145-14314566 REVERSE LENGTH=587	e-126
assembly691_468bp	NoHits
assembly692_856bp	AT3G11540.1	Symbols: SPY | Tetratricopeptide repeat (TPR)-like superfamily protein | chr3:3632842-3637547 FORWARD LENGTH=914	e-120
assembly693_859bp	AT1G03170.1	Symbols: | Protein of unknown function (DUF3049) | chr1:769805-770527 FORWARD LENGTH=240	3e-55
assembly694_428bp	NoHits
assembly695_473bp	NoHits
assembly696_572bp	NoHits
assembly697_408bp	NoHits
assembly698_2027bp	AT2G07240.1	Symbols: | cysteine-type peptidases;cysteine-type peptidases | chr2:3007102-3011701 REVERSE LENGTH=874	4e-32
assembly699_2218bp	AT2G07240.1	Symbols: | cysteine-type peptidases;cysteine-type peptidases | chr2:3007102-3011701 REVERSE LENGTH=874	1e-29
assembly700_727bp	AT2G29390.1	Symbols: SMO2-2, ATSMO2 | sterol 4-alpha-methyl-oxidase 2-2 | chr2:12610758-12612799 REVERSE LENGTH=272	e-110
assembly701_793bp	AT1G75020.1	Symbols: LPAT4 | lysophosphatidyl acyltransferase 4 | chr1:28171779-28173357 FORWARD LENGTH=378	1e-81
assembly702_1365bp	AT1G12220.1	Symbols: RPS5 | Disease resistance protein (CC-NBS-LRR class) family | chr1:4145011-4147680 FORWARD LENGTH=889	4e-47
assembly703_316bp	NoHits
assembly704_342bp	AT3G26700.1	Symbols: | Protein kinase superfamily protein | chr3:9810669-9812356 FORWARD LENGTH=380	8e-12
assembly705_345bp	NoHits
assembly706_608bp	NoHits
assembly707_1057bp	AT4G19180.1	Symbols: | GDA1/CD39 nucleoside phosphatase family protein | chr4:10485518-10487868 REVERSE LENGTH=740	e-156
assembly708_415bp	NoHits
assembly709_466bp	AT1G54610.2	Symbols: | Protein kinase superfamily protein | chr1:20393962-20396902 REVERSE LENGTH=573	3e-10
assembly710_850bp	NoHits
assembly711_871bp	NoHits
assembly712_634bp	AT5G52882.1	Symbols: | P-loop containing nucleoside triphosphate hydrolases superfamily protein | chr5:21434155-21438362 REVERSE LENGTH=829	6e-09
assembly713_469bp	AT3G24010.1	Symbols: ING1, ATING1 | RING/FYVE/PHD zinc finger superfamily protein | chr3:8676120-8678186 REVERSE LENGTH=234	7e-07
assembly714_853bp	NoHits
assembly715_323bp	AT2G40890.1	Symbols: CYP98A3 | cytochrome P450, family 98, subfamily A, polypeptide 3 | chr2:17058291-17060532 REVERSE LENGTH=508	6e-09
assembly716_377bp	AT3G21760.1	Symbols: HYR1 | UDP-Glycosyltransferase superfamily protein | chr3:7667099-7668556 FORWARD LENGTH=485	2e-34
assembly717_559bp	AT1G75780.1	Symbols: TUB1 | tubulin beta-1 chain | chr1:28451378-28453602 REVERSE LENGTH=447	9e-54
assembly718_689bp	AT1G19630.1	Symbols: CYP722A1 | cytochrome P450, family 722, subfamily A, polypeptide 1 | chr1:6785427-6787967 REVERSE LENGTH=476	e-120
assembly719_575bp	NoHits
assembly720_2384bp	AT4G08210.1	Symbols: | Pentatricopeptide repeat (PPR-like) superfamily protein | chr4:5183813-5185873 REVERSE LENGTH=686	0
assembly721_452bp	AT1G18800.1	Symbols: NRP2 | NAP1-related protein 2 | chr1:6481466-6483463 REVERSE LENGTH=256	3e-51
assembly722_1540bp	AT4G01000.1	Symbols: | Ubiquitin-like superfamily protein | chr4:432186-433727 REVERSE LENGTH=415	e-147
assembly723_883bp	NoHits
assembly724_395bp	NoHits
assembly725_708bp	AT5G11430.1	Symbols: | SPOC domain / Transcription elongation factor S-II protein | chr5:3648469-3652256 FORWARD LENGTH=873	3e-28
assembly726_620bp	AT2G25640.1	Symbols: | SPOC domain / Transcription elongation factor S-II protein | chr2:10910836-10913908 FORWARD LENGTH=745	4e-26
assembly727_389bp	AT5G25830.1	Symbols: GATA12 | GATA transcription factor 12 | chr5:9004398-9005502 REVERSE LENGTH=331	3e-12
assembly728_1473bp	AT4G23160.1	Symbols: CRK8 | cysteine-rich RLK (RECEPTOR-like protein kinase) 8 | chr4:12129485-12134086 FORWARD LENGTH=1262	2e-74
assembly729_531bp	AT5G04940.1	Symbols: SUVH1 | SU(VAR)3-9 homolog 1 | chr5:1454616-1456628 REVERSE LENGTH=670	6e-14
assembly730_327bp	AT5G04940.1	Symbols: SUVH1 | SU(VAR)3-9 homolog 1 | chr5:1454616-1456628 REVERSE LENGTH=670	8e-15
assembly731_495bp	NoHits
assembly732_1234bp	AT1G54130.1	Symbols: RSH3, AT-RSH3, ATRSH3 | RELA/SPOT homolog 3 | chr1:20211177-20213761 FORWARD LENGTH=715	0
assembly733_330bp	AT1G26620.1	Symbols: | Plant protein of unknown function (DUF863) | chr1:9195838-9198719 REVERSE LENGTH=867	3e-08
assembly734_331bp	AT1G26620.1	Symbols: | Plant protein of unknown function (DUF863) | chr1:9195838-9198719 REVERSE LENGTH=867	1e-16
assembly735_316bp	NoHits
assembly736_353bp	AT3G09830.1	Symbols: | Protein kinase superfamily protein | chr3:3017199-3018696 FORWARD LENGTH=418	4e-06
assembly737_329bp	NoHits
assembly738_369bp	NoHits
assembly739_348bp	NoHits
assembly740_452bp	AT4G29180.2	Symbols: RHS16 | root hair specific 16 | chr4:14385631-14389524 FORWARD LENGTH=913	2e-83
assembly741_575bp	AT5G49030.1	Symbols: OVA2 | tRNA synthetase class I (I, L, M and V) family protein | chr5:19875091-19882291 REVERSE LENGTH=1093	3e-13
assembly742_369bp	AT3G07750.1	Symbols: | 3'-5'-exoribonuclease family protein | chr3:2473486-2475218 FORWARD LENGTH=286	1e-14
assembly743_341bp	AT1G43760.1	Symbols: | DNAse I-like superfamily protein | chr1:16528880-16531065 REVERSE LENGTH=626	6e-07
assembly744_332bp	NoHits
assembly745_335bp	AT2G01880.1	Symbols: PAP7, ATPAP7 | purple acid phosphatase 7 | chr2:391563-393967 REVERSE LENGTH=328	8e-11
assembly746_352bp	AT3G27570.1	Symbols: | Sucrase/ferredoxin-like family protein | chr3:10214276-10216681 REVERSE LENGTH=379	4e-09
assembly747_330bp	NoHits
assembly748_371bp	AT5G17010.1	Symbols: | Major facilitator superfamily protein | chr5:5587851-5592332 REVERSE LENGTH=503	1e-13
assembly749_305bp	NoHits
assembly750_395bp	NoHits
assembly751_327bp	AT3G62910.1	Symbols: APG3 | Peptide chain release factor 1 | chr3:23257661-23260386 REVERSE LENGTH=422	6e-06
assembly752_328bp	AT4G17640.1	Symbols: CKB2 | casein kinase II beta chain 2 | chr4:9825438-9826988 FORWARD LENGTH=282	4e-12
assembly753_327bp	AT1G29720.1	Symbols: | Leucine-rich repeat transmembrane protein kinase | chr1:10393894-10399771 REVERSE LENGTH=1019	5e-51
assembly754_325bp	AT4G39050.1	Symbols: | Kinesin motor family protein | chr4:18193462-18200148 FORWARD LENGTH=1055	9e-38
assembly755_342bp	NoHits
assembly756_337bp	AT5G67630.1	Symbols: | P-loop containing nucleoside triphosphate hydrolases superfamily protein | chr5:26967535-26969306 REVERSE LENGTH=469	4e-11
assembly757_381bp	AT4G26965.1	Symbols: | NADH:ubiquinone oxidoreductase, 17.2kDa subunit | chr4:13539717-13542041 FORWARD LENGTH=184	4e-16
assembly758_340bp	NoHits
assembly759_403bp	AT3G04730.1	Symbols: IAA16 | indoleacetic acid-induced protein 16 | chr3:1288993-1290415 REVERSE LENGTH=236	2e-29
assembly760_302bp	AT5G20720.1	Symbols: CPN20, CPN10, CHCPN10, ATCPN21, CPN21 | chaperonin 20 | chr5:7015015-7016354 FORWARD LENGTH=253	2e-08
assembly761_307bp	AT5G44005.1	Symbols: | unknown protein; FUNCTIONS IN: molecular_function unknown; INVOLVED IN: biological_process unknown; LOCATED IN: plasma membrane; Has 35333 Blast hits to 34131 proteins in 2444 species: Archae - 798; Bacteria - 22429; Metazoa - 974; Fungi - 991; Plants - 531; Viruses - 0; Other Eukaryotes - 9610 (source: NCBI BLink). | chr5:17705209-17705493 REVERSE LENGTH=94	7e-18
assembly762_310bp	AT3G10430.1	Symbols: | F-box and associated interaction domains-containing protein | chr3:3242750-3243862 REVERSE LENGTH=370	3e-09
assembly763_303bp	AT1G01240.1	Symbols: | unknown protein; INVOLVED IN: N-terminal protein myristoylation; EXPRESSED IN: 17 plant structures; EXPRESSED DURING: 11 growth stages; BEST Arabidopsis thaliana protein match is: unknown protein (TAIR:AT2G46550.1); Has 95 Blast hits to 78 proteins in 16 species: Archae - 0; Bacteria - 2; Metazoa - 11; Fungi - 0; Plants - 80; Viruses - 0; Other Eukaryotes - 2 (source: NCBI BLink). | ch…	1e-23
assembly764_388bp	NoHits
assembly765_346bp	NoHits
assembly766_380bp	AT5G08690.1	Symbols: | ATP synthase alpha/beta family protein | chr5:2825739-2828352 FORWARD LENGTH=556	3e-55
assembly767_315bp	NoHits
assembly768_308bp	NoHits
assembly769_313bp	NoHits
assembly770_360bp	AT4G32720.1	Symbols: AtLa1, La1 | La protein 1 | chr4:15787313-15789683 FORWARD LENGTH=433	8e-08
assembly771_319bp	AT4G09420.1	Symbols: | Disease resistance protein (TIR-NBS class) | chr4:5962319-5963776 REVERSE LENGTH=457	4e-06
assembly772_456bp	AT1G54020.2	Symbols: | GDSL-like Lipase/Acylhydrolase superfamily protein | chr1:20161805-20163706 REVERSE LENGTH=372	3e-64
assembly773_363bp	AT4G17380.1	Symbols: MSH4, ATMSH4 | MUTS-like protein 4 | chr4:9708742-9714068 FORWARD LENGTH=792	6e-10
assembly774_318bp	NoHits
assembly775_377bp	AT5G26751.1	Symbols: ATSK11, SK 11 | shaggy-related kinase 11 | chr5:9399582-9401839 REVERSE LENGTH=405	9e-80
assembly776_325bp	NoHits
assembly777_967bp	AT1G75490.1	Symbols: | Integrase-type DNA-binding superfamily protein | chr1:28336045-28336665 FORWARD LENGTH=206	e-110
assembly778_2046bp	AT5G43560.1	Symbols: | TRAF-like superfamily protein | chr5:17501043-17505526 FORWARD LENGTH=1055	e-154
assembly779_964bp	AT2G02060.1	Symbols: | Homeodomain-like superfamily protein | chr2:495691-497609 FORWARD LENGTH=256	2e-58
assembly780_650bp	AT5G09880.1	Symbols: | Splicing factor, CC1-like | chr5:3081646-3085179 REVERSE LENGTH=527	1e-08
assembly781_383bp	AT5G09880.1	Symbols: | Splicing factor, CC1-like | chr5:3081646-3085179 REVERSE LENGTH=527	3e-12
assembly782_640bp	AT1G69970.1	Symbols: CLE26 | CLAVATA3/ESR-RELATED 26 | chr1:26353900-26354256 REVERSE LENGTH=118	2e-33
assembly783_646bp	AT1G69970.1	Symbols: CLE26 | CLAVATA3/ESR-RELATED 26 | chr1:26353900-26354256 REVERSE LENGTH=118	1e-29
assembly784_629bp	AT4G32600.1	Symbols: | RING/U-box superfamily protein | chr4:15724010-15725737 FORWARD LENGTH=453	4e-06
assembly785_2488bp	AT3G15605.4	Symbols: | nucleic acid binding | chr3:5288291-5290941 FORWARD LENGTH=481	e-134
assembly786_2369bp	AT3G15605.4	Symbols: | nucleic acid binding | chr3:5288291-5290941 FORWARD LENGTH=481	e-143
assembly787_2278bp	AT3G15605.4	Symbols: | nucleic acid binding | chr3:5288291-5290941 FORWARD LENGTH=481	e-156
assembly788_2579bp	AT3G15605.4	Symbols: | nucleic acid binding | chr3:5288291-5290941 FORWARD LENGTH=481	e-121
assembly789_621bp	AT5G51840.1	Symbols: | unknown protein; Has 30201 Blast hits to 17322 proteins in 780 species: Archae - 12; Bacteria - 1396; Metazoa - 17338; Fungi - 3422; Plants - 5037; Viruses - 0; Other Eukaryotes - 2996 (source: NCBI BLink). | chr5:21072143-21074131 FORWARD LENGTH=245	5e-37
assembly790_922bp	AT5G51840.1	Symbols: | unknown protein; Has 30201 Blast hits to 17322 proteins in 780 species: Archae - 12; Bacteria - 1396; Metazoa - 17338; Fungi - 3422; Plants - 5037; Viruses - 0; Other Eukaryotes - 2996 (source: NCBI BLink). | chr5:21072143-21074131 FORWARD LENGTH=245	1e-29
assembly791_805bp	AT5G51840.1	Symbols: | unknown protein; Has 30201 Blast hits to 17322 proteins in 780 species: Archae - 12; Bacteria - 1396; Metazoa - 17338; Fungi - 3422; Plants - 5037; Viruses - 0; Other Eukaryotes - 2996 (source: NCBI BLink). | chr5:21072143-21074131 FORWARD LENGTH=245	5e-30
assembly792_687bp	AT5G51840.1	Symbols: | unknown protein; Has 30201 Blast hits to 17322 proteins in 780 species: Archae - 12; Bacteria - 1396; Metazoa - 17338; Fungi - 3422; Plants - 5037; Viruses - 0; Other Eukaryotes - 2996 (source: NCBI BLink). | chr5:21072143-21074131 FORWARD LENGTH=245	1e-42
assembly793_320bp	AT1G75520.1	Symbols: SRS5 | SHI-related sequence 5 | chr1:28351779-28353179 REVERSE LENGTH=346	6e-12
assembly794_464bp	NoHits
assembly795_414bp	AT4G26900.1	Symbols: AT-HF, HISN4 | HIS HF | chr4:13515514-13519608 FORWARD LENGTH=592	6e-13
assembly796_1734bp	AT2G26870.1	Symbols: NPC2 | non-specific phospholipase C2 | chr2:11457117-11459355 REVERSE LENGTH=514	0
assembly797_1133bp	AT1G29950.1	Symbols: | basic helix-loop-helix (bHLH) DNA-binding superfamily protein | chr1:10493461-10494216 FORWARD LENGTH=251	6e-86
assembly798_315bp	NoHits
assembly799_928bp	NoHits
assembly800_2100bp	NoHits
assembly801_492bp	NoHits
assembly802_627bp	AT5G25752.1	Symbols: ATRBL11, RBL11 | rhomboid-like protein 11 | chr5:8951503-8953323 REVERSE LENGTH=280	3e-08
assembly803_393bp	NoHits
assembly804_331bp	AT4G32070.1	Symbols: Phox4 | Octicosapeptide/Phox/Bem1p (PB1) domain-containing protein / tetratricopeptide repeat (TPR)-containing protein | chr4:15504662-15507097 REVERSE LENGTH=811	1e-06
assembly805_1344bp	AT3G29200.1	Symbols: CM1, ATCM1 | chorismate mutase 1 | chr3:11164582-11166258 REVERSE LENGTH=340	e-172
assembly806_857bp	AT3G29200.1	Symbols: CM1, ATCM1 | chorismate mutase 1 | chr3:11164582-11166258 REVERSE LENGTH=340	8e-58
assembly807_599bp	AT2G37678.1	Symbols: FHY1, PAT3, FRY1 | far-red elongated hypocotyl 1 | chr2:15801689-15802696 REVERSE LENGTH=202	2e-47
assembly808_437bp	NoHits
assembly809_658bp	AT2G37678.1	Symbols: FHY1, PAT3, FRY1 | far-red elongated hypocotyl 1 | chr2:15801689-15802696 REVERSE LENGTH=202	1e-47
assembly810_583bp	AT2G37678.1	Symbols: FHY1, PAT3, FRY1 | far-red elongated hypocotyl 1 | chr2:15801689-15802696 REVERSE LENGTH=202	5e-48
assembly811_695bp	AT1G48630.1	Symbols: RACK1B_AT | receptor for activated C kinase 1B | chr1:17981977-17983268 REVERSE LENGTH=326	e-102
assembly812_765bp	AT2G26060.1	Symbols: emb1345 | Transducin/WD40 repeat-like superfamily protein | chr2:11102400-11105127 FORWARD LENGTH=352	4e-38
assembly813_946bp	AT2G26060.1	Symbols: emb1345 | Transducin/WD40 repeat-like superfamily protein | chr2:11102400-11105127 FORWARD LENGTH=352	8e-24
assembly814_2421bp	AT1G34120.2	Symbols: IP5PI, AT5P1, ATIP5PI | inositol polyphosphate 5-phosphatase I | chr1:12426831-12429526 FORWARD LENGTH=590	0
assembly815_1287bp	AT1G73350.2	Symbols: | unknown protein; FUNCTIONS IN: molecular_function unknown; INVOLVED IN: biological_process unknown; EXPRESSED IN: 25 plant structures; EXPRESSED DURING: 15 growth stages; Has 50 Blast hits to 50 proteins in 20 species: Archae - 0; Bacteria - 0; Metazoa - 7; Fungi - 3; Plants - 36; Viruses - 0; Other Eukaryotes - 4 (source: NCBI BLink). | chr1:27575683-27577126 REVERSE LENGTH=210	2e-64
assembly816_1077bp	AT1G73350.2	Symbols: | unknown protein; FUNCTIONS IN: molecular_function unknown; INVOLVED IN: biological_process unknown; EXPRESSED IN: 25 plant structures; EXPRESSED DURING: 15 growth stages; Has 50 Blast hits to 50 proteins in 20 species: Archae - 0; Bacteria - 0; Metazoa - 7; Fungi - 3; Plants - 36; Viruses - 0; Other Eukaryotes - 4 (source: NCBI BLink). | chr1:27575683-27577126 REVERSE LENGTH=210	1e-52
assembly817_1161bp	AT1G73350.2	Symbols: | unknown protein; FUNCTIONS IN: molecular_function unknown; INVOLVED IN: biological_process unknown; EXPRESSED IN: 25 plant structures; EXPRESSED DURING: 15 growth stages; Has 50 Blast hits to 50 proteins in 20 species: Archae - 0; Bacteria - 0; Metazoa - 7; Fungi - 3; Plants - 36; Viruses - 0; Other Eukaryotes - 4 (source: NCBI BLink). | chr1:27575683-27577126 REVERSE LENGTH=210	4e-54
assembly818_1371bp	AT1G73350.2	Symbols: | unknown protein; FUNCTIONS IN: molecular_function unknown; INVOLVED IN: biological_process unknown; EXPRESSED IN: 25 plant structures; EXPRESSED DURING: 15 growth stages; Has 50 Blast hits to 50 proteins in 20 species: Archae - 0; Bacteria - 0; Metazoa - 7; Fungi - 3; Plants - 36; Viruses - 0; Other Eukaryotes - 4 (source: NCBI BLink). | chr1:27575683-27577126 REVERSE LENGTH=210	8e-66
assembly819_396bp	AT1G69440.1	Symbols: AGO7, ZIP | Argonaute family protein | chr1:26101565-26105016 REVERSE LENGTH=990	6e-59
assembly820_369bp	AT4G04320.1	Symbols: | malonyl-CoA decarboxylase family protein | chr4:2113565-2116525 FORWARD LENGTH=518	6e-14
assembly821_604bp	AT4G04320.1	Symbols: | malonyl-CoA decarboxylase family protein | chr4:2113565-2116525 FORWARD LENGTH=518	4e-12
assembly822_694bp	AT2G27530.1	Symbols: PGY1 | Ribosomal protein L1p/L10e family | chr2:11763443-11764570 REVERSE LENGTH=216	1e-90
assembly823_1331bp	NoHits
assembly824_1634bp	NoHits
assembly825_1292bp	NoHits
assembly826_494bp	AT2G22620.1	Symbols: | Rhamnogalacturonate lyase family protein | chr2:9604902-9610156 REVERSE LENGTH=677	e-105
assembly827_436bp	AT2G22620.1	Symbols: | Rhamnogalacturonate lyase family protein | chr2:9604902-9610156 REVERSE LENGTH=677	1e-70
assembly828_614bp	AT2G22620.1	Symbols: | Rhamnogalacturonate lyase family protein | chr2:9604902-9610156 REVERSE LENGTH=677	3e-97
assembly829_1112bp	AT3G24010.1	Symbols: ING1, ATING1 | RING/FYVE/PHD zinc finger superfamily protein | chr3:8676120-8678186 REVERSE LENGTH=234	e-111
assembly830_919bp	AT1G78310.1	Symbols: | VQ motif-containing protein | chr1:29464003-29464938 REVERSE LENGTH=311	5e-84
assembly831_2468bp	AT1G06820.1	Symbols: CRTISO, CCR2 | carotenoid isomerase | chr1:2093145-2096220 REVERSE LENGTH=595	0
assembly832_916bp	AT1G30020.1	Symbols: | Protein of unknown function, DUF538 | chr1:10515874-10516347 REVERSE LENGTH=157	2e-52
assembly833_3274bp	AT1G30010.1	Symbols: | Intron maturase, type II family protein | chr1:10513194-10515329 FORWARD LENGTH=711	0
assembly834_351bp	AT1G30000.1	Symbols: MNS3 | alpha-mannosidase 3 | chr1:10509532-10512320 REVERSE LENGTH=624	2e-15
assembly835_2771bp	AT5G62230.1	Symbols: ERL1 | ERECTA-like 1 | chr5:24996433-25002130 FORWARD LENGTH=966	0
assembly836_903bp	AT4G08555.1	Symbols: | unknown protein; FUNCTIONS IN: molecular_function unknown; INVOLVED IN: biological_process unknown; LOCATED IN: cellular_component unknown; EXPRESSED IN: cultured cell; Has 4 Blast hits to 4 proteins in 2 species: Archae - 0; Bacteria - 0; Metazoa - 0; Fungi - 0; Plants - 4; Viruses - 0; Other Eukaryotes - 0 (source: NCBI BLink). | chr4:5448191-5448400 FORWARD LENGTH=69	4e-12
assembly837_1228bp	AT2G39310.1	Symbols: JAL22 | jacalin-related lectin 22 | chr2:16414262-16416323 REVERSE LENGTH=458	e-154
assembly838_1056bp	AT1G57620.1	Symbols: | emp24/gp25L/p24 family/GOLD family protein | chr1:21342863-21344581 FORWARD LENGTH=212	4e-09
assembly839_355bp	AT3G15358.1	Symbols: | unknown protein; FUNCTIONS IN: molecular_function unknown; INVOLVED IN: biological_process unknown; LOCATED IN: endomembrane system; BEST Arabidopsis thaliana protein match is: unknown protein (TAIR:AT1G53035.1); Has 35333 Blast hits to 34131 proteins in 2444 species: Archae - 798; Bacteria - 22429; Metazoa - 974; Fungi - 991; Plants - 531; Viruses - 0; Other Eukaryotes - 9610 (source:…	1e-29
assembly840_723bp	AT4G29850.1	Symbols: | Eukaryotic protein of unknown function (DUF872) | chr4:14601818-14602874 REVERSE LENGTH=103	5e-10
assembly841_1342bp	AT4G21380.1	Symbols: ARK3, RK3 | receptor kinase 3 | chr4:11389219-11393090 REVERSE LENGTH=850	2e-90
assembly842_1238bp	AT4G21380.1	Symbols: ARK3, RK3 | receptor kinase 3 | chr4:11389219-11393090 REVERSE LENGTH=850	e-108
assembly843_504bp	NoHits
assembly844_475bp	AT3G26030.1	Symbols: ATB' DELTA | serine/threonine protein phosphatase 2A 55 kDa regulatory subunit B prime delta | chr3:9517741-9519260 FORWARD LENGTH=477	1e-10
assembly845_1066bp	AT5G54840.1	Symbols: ATSGP1, SGP1 | Ras-related small GTP-binding family protein | chr5:22276611-22278328 REVERSE LENGTH=288	0
assembly846_509bp	AT5G54840.1	Symbols: ATSGP1, SGP1 | Ras-related small GTP-binding family protein | chr5:22276611-22278328 REVERSE LENGTH=288	4e-51
assembly847_881bp	NoHits
assembly848_394bp	NoHits
assembly849_328bp	AT1G22620.1	Symbols: ATSAC1 | Phosphoinositide phosphatase family protein | chr1:7997889-8002787 REVERSE LENGTH=912	4e-30
assembly850_352bp	AT1G22620.1	Symbols: ATSAC1 | Phosphoinositide phosphatase family protein | chr1:7997889-8002787 REVERSE LENGTH=912	1e-30
assembly851_338bp	AT1G22620.1	Symbols: ATSAC1 | Phosphoinositide phosphatase family protein | chr1:7997889-8002787 REVERSE LENGTH=912	1e-39
assembly852_385bp	AT3G56120.1	Symbols: | S-adenosyl-L-methionine-dependent methyltransferases superfamily protein | chr3:20823243-20826357 FORWARD LENGTH=468	1e-19
assembly853_463bp	AT3G56120.1	Symbols: | S-adenosyl-L-methionine-dependent methyltransferases superfamily protein | chr3:20823243-20826357 FORWARD LENGTH=468	3e-19
assembly854_692bp	AT3G56120.1	Symbols: | S-adenosyl-L-methionine-dependent methyltransferases superfamily protein | chr3:20823243-20826357 FORWARD LENGTH=468	5e-21
assembly855_482bp	AT3G22290.1	Symbols: | Endoplasmic reticulum vesicle transporter protein | chr3:7882082-7885260 FORWARD LENGTH=354	3e-48
assembly856_1434bp	AT5G14020.1	Symbols: | Endosomal targeting BRO1-like domain-containing protein | chr5:4523730-4525819 REVERSE LENGTH=401	0
assembly857_471bp	NoHits
assembly858_493bp	NoHits
assembly859_401bp	NoHits
assembly860_361bp	NoHits
assembly861_1310bp	AT4G10080.1	Symbols: | unknown protein; BEST Arabidopsis thaliana protein match is: unknown protein (TAIR:AT4G13530.1); Has 120 Blast hits to 114 proteins in 21 species: Archae - 2; Bacteria - 4; Metazoa - 0; Fungi - 12; Plants - 100; Viruses - 0; Other Eukaryotes - 2 (source: NCBI BLink). | chr4:6300454-6302560 REVERSE LENGTH=325	5e-80
assembly862_402bp	NoHits
assembly863_1399bp	AT2G06500.1	Symbols: | hAT family dimerisation domain | chr2:2580718-2583223 REVERSE LENGTH=582	7e-39
assembly864_437bp	AT4G10200.1	Symbols: | TTF-type zinc finger protein with HAT dimerisation domain | chr4:6353172-6355591 FORWARD LENGTH=733	1e-28
assembly865_428bp	AT1G06290.1	Symbols: ACX3, ATACX3 | acyl-CoA oxidase 3 | chr1:1922423-1926002 FORWARD LENGTH=675	1e-15
assembly866_451bp	AT1G06290.1	Symbols: ACX3, ATACX3 | acyl-CoA oxidase 3 | chr1:1922423-1926002 FORWARD LENGTH=675	1e-16
assembly867_623bp	AT1G06290.1	Symbols: ACX3, ATACX3 | acyl-CoA oxidase 3 | chr1:1922423-1926002 FORWARD LENGTH=675	2e-17
assembly868_893bp	AT1G06290.1	Symbols: ACX3, ATACX3 | acyl-CoA oxidase 3 | chr1:1922423-1926002 FORWARD LENGTH=675	3e-16
assembly869_1930bp	AT3G57200.1	Symbols: | unknown protein; BEST Arabidopsis thaliana protein match is: unknown protein (TAIR:AT2G41451.1); Has 94 Blast hits to 94 proteins in 31 species: Archae - 0; Bacteria - 12; Metazoa - 0; Fungi - 0; Plants - 77; Viruses - 0; Other Eukaryotes - 5 (source: NCBI BLink). | chr3:21169413-21172103 FORWARD LENGTH=514	0
assembly870_2006bp	AT3G57200.1	Symbols: | unknown protein; BEST Arabidopsis thaliana protein match is: unknown protein (TAIR:AT2G41451.1); Has 94 Blast hits to 94 proteins in 31 species: Archae - 0; Bacteria - 12; Metazoa - 0; Fungi - 0; Plants - 77; Viruses - 0; Other Eukaryotes - 5 (source: NCBI BLink). | chr3:21169413-21172103 FORWARD LENGTH=514	0
assembly871_1760bp	AT2G04680.1	Symbols: | Cysteine/Histidine-rich C1 domain family protein | chr2:1640188-1642161 FORWARD LENGTH=657	0
assembly872_2929bp	AT2G19640.2	Symbols: ASHR2 | ASH1-related protein 2 | chr2:8491401-8492597 FORWARD LENGTH=398	0
assembly873_780bp	AT2G19660.1	Symbols: | Cysteine/Histidine-rich C1 domain family protein | chr2:8496720-8498708 REVERSE LENGTH=662	3e-84
assembly874_2327bp	AT3G02040.1	Symbols: SRG3 | senescence-related gene 3 | chr3:348505-349909 REVERSE LENGTH=361	0
assembly875_915bp	AT5G63460.4	Symbols: | SAP domain-containing protein | chr5:25413605-25415399 REVERSE LENGTH=174	1e-69
assembly876_1052bp	NoHits
assembly877_450bp	AT2G20930.1	Symbols: | SNARE-like superfamily protein | chr2:9000790-9001656 REVERSE LENGTH=140	9e-15
assembly878_625bp	AT1G12820.1	Symbols: AFB3 | auxin signaling F-box 3 | chr1:4368879-4370780 REVERSE LENGTH=577	1e-10
assembly879_304bp	AT4G30360.1	Symbols: ATCNGC17, CNGC17 | cyclic nucleotide-gated channel 17 | chr4:14855060-14857779 REVERSE LENGTH=720	9e-06
assembly880_331bp	NoHits
assembly881_606bp	AT1G12820.1	Symbols: AFB3 | auxin signaling F-box 3 | chr1:4368879-4370780 REVERSE LENGTH=577	9e-11
assembly882_953bp	AT1G30120.1	Symbols: PDH-E1 BETA | pyruvate dehydrogenase E1 beta | chr1:10584350-10586477 REVERSE LENGTH=406	1e-09
assembly883_2055bp	AT2G39435.1	Symbols: | Phosphatidylinositol N-acetyglucosaminlytransferase subunit P-related | chr2:16464806-16466492 REVERSE LENGTH=464	e-115
assembly884_2056bp	AT2G39435.1	Symbols: | Phosphatidylinositol N-acetyglucosaminlytransferase subunit P-related | chr2:16464806-16466492 REVERSE LENGTH=464	e-145
assembly885_2130bp	AT2G39435.1	Symbols: | Phosphatidylinositol N-acetyglucosaminlytransferase subunit P-related | chr2:16464806-16466492 REVERSE LENGTH=464	e-116
assembly886_459bp	AT1G13560.1	Symbols: AAPT1, ATAAPT1 | aminoalcoholphosphotransferase 1 | chr1:4638834-4641691 REVERSE LENGTH=389	3e-27
assembly887_621bp	NoHits
assembly888_505bp	NoHits
assembly889_1335bp	AT4G13870.2	Symbols: WRNEXO | Werner syndrome-like exonuclease | chr4:8023563-8025542 REVERSE LENGTH=288	e-129
assembly890_483bp	AT3G45140.1	Symbols: LOX2, ATLOX2 | lipoxygenase 2 | chr3:16525437-16529233 FORWARD LENGTH=896	4e-09
assembly891_421bp	AT3G45140.1	Symbols: LOX2, ATLOX2 | lipoxygenase 2 | chr3:16525437-16529233 FORWARD LENGTH=896	2e-09
assembly892_954bp	AT5G21960.1	Symbols: | Integrase-type DNA-binding superfamily protein | chr5:7258560-7259210 REVERSE LENGTH=216	5e-78
assembly893_838bp	AT1G46768.1	Symbols: RAP2.1 | related to AP2 1 | chr1:17266046-17266507 REVERSE LENGTH=153	1e-65
assembly894_598bp	AT5G55125.1	Symbols: | Ribosomal protein L31 | chr5:22372737-22372967 FORWARD LENGTH=76	9e-44
assembly895_2453bp	AT3G15010.1	Symbols: | RNA-binding (RRM/RBD/RNP motifs) family protein | chr3:5052844-5054058 FORWARD LENGTH=404	e-138
assembly896_3001bp	AT3G15010.1	Symbols: | RNA-binding (RRM/RBD/RNP motifs) family protein | chr3:5052844-5054058 FORWARD LENGTH=404	e-136
assembly897_2466bp	AT3G15010.1	Symbols: | RNA-binding (RRM/RBD/RNP motifs) family protein | chr3:5052844-5054058 FORWARD LENGTH=404	e-138
assembly898_1369bp	AT3G19580.1	Symbols: AZF2, ZF2 | zinc-finger protein 2 | chr3:6803293-6804114 REVERSE LENGTH=273	6e-87
assembly899_1309bp	AT3G19580.1	Symbols: AZF2, ZF2 | zinc-finger protein 2 | chr3:6803293-6804114 REVERSE LENGTH=273	2e-67
assembly900_370bp	AT5G46800.1	Symbols: BOU | Mitochondrial substrate carrier family protein | chr5:18988779-18989810 REVERSE LENGTH=300	3e-18
assembly901_546bp	AT5G46800.1	Symbols: BOU | Mitochondrial substrate carrier family protein | chr5:18988779-18989810 REVERSE LENGTH=300	2e-17
assembly902_464bp	AT5G46800.1	Symbols: BOU | Mitochondrial substrate carrier family protein | chr5:18988779-18989810 REVERSE LENGTH=300	8e-18
assembly903_622bp	NoHits
assembly904_337bp	AT1G48175.1	Symbols: emb2191 | Cytidine/deoxycytidylate deaminase family protein | chr1:17790957-17792066 FORWARD LENGTH=182	4e-13
assembly905_805bp	AT1G69420.2	Symbols: | DHHC-type zinc finger family protein | chr1:26093690-26096736 FORWARD LENGTH=596	3e-60
assembly906_347bp	NoHits
assembly907_352bp	NoHits
assembly908_849bp	AT5G40230.1	Symbols: | nodulin MtN21 /EamA-like transporter family protein | chr5:16079814-16081735 REVERSE LENGTH=370	3e-41
assembly909_587bp	NoHits
assembly910_603bp	NoHits
assembly911_515bp	NoHits
assembly912_387bp	NoHits
assembly913_1871bp	AT1G24120.1	Symbols: ARL1 | ARG1-like 1 | chr1:8529283-8531946 REVERSE LENGTH=436	0
assembly914_2499bp	AT4G09360.1	Symbols: | NB-ARC domain-containing disease resistance protein | chr4:5940186-5943280 FORWARD LENGTH=853	2e-07
assembly915_2370bp	AT1G09650.1	Symbols: | F-box and associated interaction domains-containing protein | chr1:3125978-3127126 FORWARD LENGTH=382	1e-05
assembly916_4625bp	AT1G61850.1	Symbols: | phospholipases;galactolipases | chr1:22856317-22862225 FORWARD LENGTH=1311	0
assembly917_337bp	AT3G02230.1	Symbols: RGP1, ATRGP1 | reversibly glycosylated polypeptide 1 | chr3:415463-417304 FORWARD LENGTH=357	8e-49
assembly918_334bp	AT3G02230.1	Symbols: RGP1, ATRGP1 | reversibly glycosylated polypeptide 1 | chr3:415463-417304 FORWARD LENGTH=357	2e-48
assembly919_478bp	AT1G04300.3	Symbols: | TRAF-like superfamily protein | chr1:1148818-1153895 REVERSE LENGTH=1082	3e-23
assembly920_423bp	AT1G04300.3	Symbols: | TRAF-like superfamily protein | chr1:1148818-1153895 REVERSE LENGTH=1082	2e-23
assembly921_610bp	AT1G04300.3	Symbols: | TRAF-like superfamily protein | chr1:1148818-1153895 REVERSE LENGTH=1082	1e-22
assembly922_1477bp	AT1G48160.1	Symbols: | signal recognition particle 19 kDa protein, putative / SRP19, putative | chr1:17786779-17788286 REVERSE LENGTH=145	5e-69
assembly923_1569bp	AT1G48160.1	Symbols: | signal recognition particle 19 kDa protein, putative / SRP19, putative | chr1:17786779-17788286 REVERSE LENGTH=145	4e-65
assembly924_481bp	NoHits
assembly925_488bp	AT4G11560.1	Symbols: | bromo-adjacent homology (BAH) domain-containing protein | chr4:7000095-7003445 REVERSE LENGTH=587	6e-07
assembly926_1763bp	AT5G67540.2	Symbols: | Arabinanase/levansucrase/invertase | chr5:26944253-26945757 REVERSE LENGTH=471	0
assembly927_1825bp	AT5G67540.2	Symbols: | Arabinanase/levansucrase/invertase | chr5:26944253-26945757 REVERSE LENGTH=471	0
assembly928_491bp	NoHits
assembly929_669bp	NoHits
assembly930_547bp	AT1G16470.1	Symbols: PAB1 | proteasome subunit PAB1 | chr1:5623122-5625439 FORWARD LENGTH=235	3e-20
assembly931_449bp	AT1G16470.1	Symbols: PAB1 | proteasome subunit PAB1 | chr1:5623122-5625439 FORWARD LENGTH=235	1e-20
assembly932_337bp	AT1G16470.1	Symbols: PAB1 | proteasome subunit PAB1 | chr1:5623122-5625439 FORWARD LENGTH=235	3e-22
assembly933_432bp	NoHits
assembly934_655bp	NoHits
assembly935_3742bp	AT1G64430.1	Symbols: | Pentatricopeptide repeat (PPR) superfamily protein | chr1:23933541-23936336 FORWARD LENGTH=559	0
assembly936_3990bp	AT1G64430.1	Symbols: | Pentatricopeptide repeat (PPR) superfamily protein | chr1:23933541-23936336 FORWARD LENGTH=559	0
assembly937_305bp	AT5G14260.3	Symbols: | Rubisco methyltransferase family protein | chr5:4601139-4603873 FORWARD LENGTH=514	6e-47
assembly938_386bp	AT5G14260.3	Symbols: | Rubisco methyltransferase family protein | chr5:4601139-4603873 FORWARD LENGTH=514	2e-42
assembly939_484bp	AT5G14260.3	Symbols: | Rubisco methyltransferase family protein | chr5:4601139-4603873 FORWARD LENGTH=514	6e-43
assembly940_444bp	AT1G74270.1	Symbols: | Ribosomal protein L35Ae family protein | chr1:27928415-27929466 REVERSE LENGTH=112	9e-39
assembly941_2254bp	AT1G17930.1	Symbols: | Aminotransferase-like, plant mobile domain family protein | chr1:6166638-6168432 REVERSE LENGTH=478	0
assembly942_1023bp	AT2G04865.1	Symbols: | Aminotransferase-like, plant mobile domain family protein | chr2:1712149-1714599 FORWARD LENGTH=667	e-138
assembly943_1471bp	AT2G04865.1	Symbols: | Aminotransferase-like, plant mobile domain family protein | chr2:1712149-1714599 FORWARD LENGTH=667	0
assembly944_875bp	AT3G23530.1	Symbols: | Cyclopropane-fatty-acyl-phospholipid synthase | chr3:8437472-8442597 FORWARD LENGTH=867	e-147
assembly945_399bp	AT3G23530.1	Symbols: | Cyclopropane-fatty-acyl-phospholipid synthase | chr3:8437472-8442597 FORWARD LENGTH=867	2e-17
assembly946_301bp	AT3G23530.1	Symbols: | Cyclopropane-fatty-acyl-phospholipid synthase | chr3:8437472-8442597 FORWARD LENGTH=867	6e-26
assembly947_1154bp	NoHits
assembly948_1647bp	AT3G20550.1	Symbols: DDL | SMAD/FHA domain-containing protein | chr3:7174695-7177600 REVERSE LENGTH=314	e-103
assembly949_1789bp	AT1G12970.1	Symbols: PIRL3 | plant intracellular ras group-related LRR 3 | chr1:4423727-4425632 FORWARD LENGTH=464	0
assembly950_335bp	AT3G24503.1	Symbols: ALDH2C4, ALDH1A, REF1 | aldehyde dehydrogenase 2C4 | chr3:8919732-8923029 REVERSE LENGTH=501	8e-41
assembly951_1722bp	AT3G12970.1	Symbols: | unknown protein; BEST Arabidopsis thaliana protein match is: unknown protein (TAIR:AT1G56020.1); Has 2408 Blast hits to 418 proteins in 91 species: Archae - 0; Bacteria - 41; Metazoa - 198; Fungi - 63; Plants - 125; Viruses - 13; Other Eukaryotes - 1968 (source: NCBI BLink). | chr3:4141329-4142474 REVERSE LENGTH=381	e-154
assembly952_1178bp	AT1G07370.1	Symbols: PCNA1, ATPCNA1 | proliferating cellular nuclear antigen 1 | chr1:2263204-2264382 FORWARD LENGTH=263	e-177
assembly953_732bp	AT4G17440.1	Symbols: | Protein of unknown function (DUF1639) | chr4:9727848-9728823 FORWARD LENGTH=215	1e-09
assembly954_1293bp	AT5G60610.1	Symbols: | F-box/RNI-like superfamily protein | chr5:24364049-24365386 FORWARD LENGTH=388	3e-64
assembly955_1494bp	AT1G76110.1	Symbols: | HMG (high mobility group) box protein with ARID/BRIGHT DNA-binding domain | chr1:28555287-28557465 REVERSE LENGTH=338	0
assembly956_352bp	NoHits
assembly957_915bp	AT3G63080.1	Symbols: ATGPX5, MEE42, GPX5 | glutathione peroxidase 5 | chr3:23310161-23311200 FORWARD LENGTH=173	e-105
assembly958_6102bp	AT3G48770.1	Symbols: | DNA binding;ATP binding | chr3:18079261-18086817 REVERSE LENGTH=1899	0
assembly959_3788bp	AT2G01980.1	Symbols: SOS1, ATSOS1, ATNHX7 | sodium proton exchanger, putative (NHX7) (SOS1) | chr2:457070-463145 FORWARD LENGTH=1146	0
assembly960_837bp	AT4G27280.1	Symbols: | Calcium-binding EF-hand family protein | chr4:13663770-13664162 REVERSE LENGTH=130	7e-60
assembly961_1296bp	AT2G42990.1	Symbols: | GDSL-like Lipase/Acylhydrolase superfamily protein | chr2:17879056-17880200 FORWARD LENGTH=350	0
assembly962_425bp	NoHits
assembly963_653bp	AT3G49490.1	Symbols: | unknown protein; Has 722 Blast hits to 186 proteins in 64 species: Archae - 0; Bacteria - 30; Metazoa - 72; Fungi - 48; Plants - 38; Viruses - 0; Other Eukaryotes - 534 (source: NCBI BLink). | chr3:18344926-18348648 REVERSE LENGTH=953	5e-70
assembly964_905bp	NoHits
assembly965_4094bp	AT5G12150.1	Symbols: | Rho GTPase activation protein (RhoGAP) with PH domain | chr5:3924393-3930100 REVERSE LENGTH=827	0
assembly966_1883bp	AT1G62180.1	Symbols: APR2, APSR, PRH43, PRH, ATAPR2 | 5'adenylylphosphosulfate reductase 2 | chr1:22975794-22977465 REVERSE LENGTH=454	0
assembly967_401bp	AT1G43760.1	Symbols: | DNAse I-like superfamily protein | chr1:16528880-16531065 REVERSE LENGTH=626	2e-13
assembly968_3597bp	AT4G15810.1	Symbols: | P-loop containing nucleoside triphosphate hydrolases superfamily protein | chr4:8989162-8992591 REVERSE LENGTH=918	0
assembly969_332bp	AT5G55350.1	Symbols: | MBOAT (membrane bound O-acyl transferase) family protein | chr5:22442356-22443393 REVERSE LENGTH=345	7e-46
assembly970_695bp	AT1G10000.1	Symbols: | Ribonuclease H-like superfamily protein | chr1:3263877-3264788 REVERSE LENGTH=303	5e-13
assembly971_1047bp	AT5G02790.1	Symbols: GSTL3 | Glutathione S-transferase family protein | chr5:632877-634858 FORWARD LENGTH=235	e-146
assembly972_8294bp	AT2G26890.1	Symbols: GRV2, KAM2 | DNAJ heat shock N-terminal domain-containing protein | chr2:11462327-11473841 REVERSE LENGTH=2554	0
assembly973_2232bp	AT4G22010.1	Symbols: sks4 | SKU5 similar 4 | chr4:11663429-11666463 FORWARD LENGTH=541	0
assembly974_1758bp	AT4G23600.1	Symbols: CORI3, JR2 | Tyrosine transaminase family protein | chr4:12310657-12312885 FORWARD LENGTH=422	0
assembly975_451bp	NoHits
assembly976_373bp	NoHits
assembly977_301bp	AT5G11150.1	Symbols: ATVAMP713, VAMP713 | vesicle-associated membrane protein 713 | chr5:3546625-3547844 REVERSE LENGTH=221	6e-12
assembly978_950bp	NoHits
assembly979_470bp	AT2G20580.1	Symbols: RPN1A, ATRPN1A | 26S proteasome regulatory subunit S2 1A | chr2:8859211-8864699 FORWARD LENGTH=891	7e-63
assembly980_1416bp	AT3G53410.1	Symbols: | RING/U-box superfamily protein | chr3:19801175-19802274 REVERSE LENGTH=299	e-126
assembly981_901bp	NoHits
assembly982_383bp	NoHits
assembly983_1707bp	AT4G23860.1	Symbols: | PHD finger protein-related | chr4:12409336-12411336 FORWARD LENGTH=452	0
assembly984_1010bp	AT2G14110.1	Symbols: | Haloacid dehalogenase-like hydrolase (HAD) superfamily protein | chr2:5952005-5953002 FORWARD LENGTH=190	e-123
assembly985_658bp	AT2G30410.1	Symbols: KIS, TFCA | tubulin folding cofactor A (KIESEL) | chr2:12959812-12960552 FORWARD LENGTH=113	5e-68
assembly986_1827bp	AT2G46900.1	Symbols: | CONTAINS InterPro DOMAIN/s: Basic helix-loop-helix, Nulp1-type (InterPro:IPR006994); Has 2929 Blast hits to 2464 proteins in 333 species: Archae - 2; Bacteria - 151; Metazoa - 913; Fungi - 372; Plants - 141; Viruses - 47; Other Eukaryotes - 1303 (source: NCBI BLink). | chr2:19269678-19271987 FORWARD LENGTH=627	0
assembly987_524bp	AT2G32560.1	Symbols: | F-box family protein | chr2:13824820-13826761 FORWARD LENGTH=371	3e-77
assembly988_860bp	AT1G30380.1	Symbols: PSAK | photosystem I subunit K | chr1:10722325-10723013 FORWARD LENGTH=130	2e-67
assembly989_4777bp	AT5G51660.1	Symbols: CPSF160, ATCPSF160 | cleavage and polyadenylation specificity factor 160 | chr5:20980250-20989268 FORWARD LENGTH=1442	0
assembly990_4451bp	AT5G20960.1	Symbols: AAO1, AO1, ATAO, AT-AO1, AOalpha, AtAO1 | aldehyde oxidase 1 | chr5:7116783-7122338 FORWARD LENGTH=1368	0
assembly991_1939bp	AT3G02710.1	Symbols: | ARM repeat superfamily protein | chr3:583184-585780 FORWARD LENGTH=529	0
assembly992_1654bp	AT3G12120.1	Symbols: FAD2 | fatty acid desaturase 2 | chr3:3860592-3861743 REVERSE LENGTH=383	0
assembly993_2377bp	AT4G09810.1	Symbols: | Nucleotide-sugar transporter family protein | chr4:6175415-6176892 REVERSE LENGTH=335	0
assembly994_1056bp	AT4G40030.2	Symbols: | Histone superfamily protein | chr4:18555840-18556827 REVERSE LENGTH=164	1e-90
assembly995_344bp	NoHits
assembly996_440bp	NoHits
assembly997_1307bp	AT3G28970.1	Symbols: AAR3 | Domain of unknown function (DUF298) | chr3:10987970-10989782 REVERSE LENGTH=295	e-154
assembly998_903bp	AT5G62440.1	Symbols: | Protein of unknown function (DUF3223) | chr5:25072620-25073917 REVERSE LENGTH=202	9e-73
assembly999_1042bp	AT1G69580.2	Symbols: | Homeodomain-like superfamily protein | chr1:26172127-26173612 FORWARD LENGTH=337	2e-74
assembly1000_831bp	AT3G59600.1	Symbols: NRPB8B, NRPD8B, NRPE8B | RNA polymerase Rpb8 | chr3:22016629-22017923 FORWARD LENGTH=146	1e-98
assembly1001_744bp	AT4G18593.1	Symbols: | dual specificity protein phosphatase-related | chr4:10238154-10238698 FORWARD LENGTH=142	3e-82
assembly1002_1662bp	AT5G57930.2	Symbols: APO2 | Arabidopsis thaliana protein of unknown function (DUF794) | chr5:23454690-23456354 FORWARD LENGTH=443	0
assembly1003_2203bp	AT3G46600.1	Symbols: | GRAS family transcription factor | chr3:17158048-17159799 FORWARD LENGTH=583	0
assembly1004_8482bp	AT1G64790.2	Symbols: ILA | ILITYHIA | chr1:24065232-24083403 REVERSE LENGTH=2696	0
assembly1005_336bp	NoHits
assembly1006_882bp	AT3G28950.1	Symbols: | AIG2-like (avirulence induced gene) family protein | chr3:10976359-10977370 REVERSE LENGTH=165	2e-96
assembly1007_2161bp	AT2G30140.1	Symbols: | UDP-Glycosyltransferase superfamily protein | chr2:12872200-12873691 FORWARD LENGTH=455	0
assembly1008_1008bp	AT4G39240.1	Symbols: | Galactose oxidase/kelch repeat superfamily protein | chr4:18269599-18270726 REVERSE LENGTH=375	e-109
assembly1009_2309bp	AT1G12570.1	Symbols: | Glucose-methanol-choline (GMC) oxidoreductase family protein | chr1:4278192-4280753 REVERSE LENGTH=572	0
assembly1010_352bp	AT3G54500.3	Symbols: | FUNCTIONS IN: molecular_function unknown; INVOLVED IN: biological_process unknown; LOCATED IN: cellular_component unknown; EXPRESSED IN: 22 plant structures; EXPRESSED DURING: 13 growth stages; BEST Arabidopsis thaliana protein match is: dentin sialophosphoprotein-related (TAIR:AT5G64170.1). | chr3:20175792-20178482 REVERSE LENGTH=669	2e-10
assembly1011_482bp	AT4G14780.1	Symbols: | Protein kinase superfamily protein | chr4:8492989-8494480 FORWARD LENGTH=364	3e-92
assembly1012_1376bp	AT3G63410.1	Symbols: APG1, VTE3, IEP37, E37 | S-adenosyl-L-methionine-dependent methyltransferases superfamily protein | chr3:23415816-23417002 REVERSE LENGTH=338	0
assembly1013_2583bp	AT1G61010.1	Symbols: CPSF73-I | cleavage and polyadenylation specificity factor 73-I | chr1:22474954-22477660 REVERSE LENGTH=693	0
assembly1014_638bp	AT3G55515.1	Symbols: DVL8, RTFL7 | ROTUNDIFOLIA like 7 | chr3:20590923-20591162 FORWARD LENGTH=79	8e-24
assembly1015_1936bp	AT5G57010.1	Symbols: | calmodulin-binding family protein | chr5:23068207-23070203 FORWARD LENGTH=495	0
assembly1016_979bp	AT4G05180.1	Symbols: PSBQ, PSBQ-2, PSII-Q | photosystem II subunit Q-2 | chr4:2672093-2673170 REVERSE LENGTH=230	e-107
assembly1017_1447bp	AT3G23710.1	Symbols: | Tic22-like family protein | chr3:8534061-8536148 FORWARD LENGTH=313	e-163
assembly1018_2311bp	AT3G18970.1	Symbols: MEF20 | mitochondrial editing factor 20 | chr3:6543699-6545117 REVERSE LENGTH=472	0
assembly1019_782bp	AT1G02870.1	Symbols: | FUNCTIONS IN: molecular_function unknown; INVOLVED IN: biological_process unknown; EXPRESSED IN: 23 plant structures; EXPRESSED DURING: 13 growth stages; CONTAINS InterPro DOMAIN/s: Ribosome biogenesis protein Nop16 (InterPro:IPR019002); Has 104 Blast hits to 104 proteins in 57 species: Archae - 0; Bacteria - 0; Metazoa - 0; Fungi - 63; Plants - 35; Viruses - 0; Other Eukaryotes - 6 (s…	e-123
assembly1020_346bp	AT3G07890.1	Symbols: | Ypt/Rab-GAP domain of gyp1p superfamily protein | chr3:2516639-2518784 REVERSE LENGTH=400	8e-12
assembly1021_1785bp	AT3G14930.1	Symbols: HEME1 | Uroporphyrinogen decarboxylase | chr3:5020675-5022577 FORWARD LENGTH=418	0
assembly1022_2614bp	AT4G08920.1	Symbols: CRY1, BLU1, HY4, OOP2, ATCRY1 | cryptochrome 1 | chr4:5724260-5726905 FORWARD LENGTH=681	0
assembly1023_488bp	NoHits
assembly1024_1668bp	AT2G13770.1	Symbols: | CONTAINS InterPro DOMAIN/s: Putative harbinger transposase-derived nuclease (InterPro:IPR006912); Has 451 Blast hits to 352 proteins in 33 species: Archae - 0; Bacteria - 0; Metazoa - 28; Fungi - 8; Plants - 388; Viruses - 0; Other Eukaryotes - 27 (source: NCBI BLink). | chr2:5736603-5737847 FORWARD LENGTH=343	2e-14
assembly1025_397bp	NoHits
assembly1026_438bp	NoHits
assembly1027_606bp	AT3G01610.1	Symbols: CDC48C, emb1354 | cell division cycle 48C | chr3:231787-235057 FORWARD LENGTH=820	3e-28
assembly1028_462bp	AT3G01610.1	Symbols: CDC48C, emb1354 | cell division cycle 48C | chr3:231787-235057 FORWARD LENGTH=820	3e-07
assembly1029_1305bp	AT3G26900.1	Symbols: SKL1, ATSKL1 | shikimate kinase like 1 | chr3:9912314-9914424 REVERSE LENGTH=280	3e-89
assembly1030_1461bp	AT3G26900.1	Symbols: SKL1, ATSKL1 | shikimate kinase like 1 | chr3:9912314-9914424 REVERSE LENGTH=280	e-105
assembly1031_1378bp	AT3G26900.1	Symbols: SKL1, ATSKL1 | shikimate kinase like 1 | chr3:9912314-9914424 REVERSE LENGTH=280	e-133
assembly1032_1388bp	AT3G26900.1	Symbols: SKL1, ATSKL1 | shikimate kinase like 1 | chr3:9912314-9914424 REVERSE LENGTH=280	7e-84
assembly1033_745bp	AT1G53860.1	Symbols: | Remorin family protein | chr1:20107165-20109458 REVERSE LENGTH=442	4e-37
assembly1034_1595bp	AT1G53860.1	Symbols: | Remorin family protein | chr1:20107165-20109458 REVERSE LENGTH=442	e-176
assembly1035_1518bp	AT1G53860.1	Symbols: | Remorin family protein | chr1:20107165-20109458 REVERSE LENGTH=442	0
assembly1036_1458bp	AT1G53860.1	Symbols: | Remorin family protein | chr1:20107165-20109458 REVERSE LENGTH=442	0
assembly1037_3574bp	AT5G01930.1	Symbols: MAN6, AtMAN6 | Glycosyl hydrolase superfamily protein | chr5:361189-362867 REVERSE LENGTH=448	0
assembly1038_3568bp	AT5G01930.1	Symbols: MAN6, AtMAN6 | Glycosyl hydrolase superfamily protein | chr5:361189-362867 REVERSE LENGTH=448	0
assembly1039_1789bp	AT1G66760.2	Symbols: | MATE efflux family protein | chr1:24902110-24904213 FORWARD LENGTH=482	0
assembly1040_1936bp	AT1G66760.2	Symbols: | MATE efflux family protein | chr1:24902110-24904213 FORWARD LENGTH=482	0
assembly1041_2014bp	AT1G66760.2	Symbols: | MATE efflux family protein | chr1:24902110-24904213 FORWARD LENGTH=482	0
assembly1042_1789bp	NoHits
assembly1043_1869bp	NoHits
assembly1044_1873bp	AT5G05800.1	Symbols: | unknown protein; BEST Arabidopsis thaliana protein match is: unknown protein (TAIR:AT3G11290.1); Has 1807 Blast hits to 1807 proteins in 277 species: Archae - 0; Bacteria - 0; Metazoa - 736; Fungi - 347; Plants - 385; Viruses - 0; Other Eukaryotes - 339 (source: NCBI BLink). | chr5:1743234-1744751 REVERSE LENGTH=449	0
assembly1045_1343bp	AT2G31710.1	Symbols: | Vacuolar ATPase assembly integral membrane protein VMA21-like domain | chr2:13482057-13482895 REVERSE LENGTH=105	1e-11
assembly1046_1531bp	AT2G15290.1	Symbols: ATTIC21, TIC21, CIA5, PIC1 | translocon at inner membrane of chloroplasts 21 | chr2:6642512-6644011 REVERSE LENGTH=296	e-174
assembly1047_2346bp	AT3G14920.1	Symbols: | Peptide-N4-(N-acetyl-beta-glucosaminyl)asparagine amidase A protein | chr3:5018275-5020104 FORWARD LENGTH=609	0
assembly1048_524bp	AT1G50200.1	Symbols: ALATS, ACD | Alanyl-tRNA synthetase | chr1:18591429-18598311 REVERSE LENGTH=1003	7e-07
assembly1049_453bp	NoHits
assembly1050_1364bp	AT1G76730.1	Symbols: | NagB/RpiA/CoA transferase-like superfamily protein | chr1:28803033-28804703 REVERSE LENGTH=354	e-151
assembly1051_1431bp	AT1G76730.1	Symbols: | NagB/RpiA/CoA transferase-like superfamily protein | chr1:28803033-28804703 REVERSE LENGTH=354	0
assembly1052_1341bp	AT1G76730.1	Symbols: | NagB/RpiA/CoA transferase-like superfamily protein | chr1:28803033-28804703 REVERSE LENGTH=354	0
assembly1053_1810bp	AT1G76730.1	Symbols: | NagB/RpiA/CoA transferase-like superfamily protein | chr1:28803033-28804703 REVERSE LENGTH=354	e-106
assembly1054_1454bp	AT1G76730.1	Symbols: | NagB/RpiA/CoA transferase-like superfamily protein | chr1:28803033-28804703 REVERSE LENGTH=354	e-146
assembly1055_1181bp	AT4G13345.1	Symbols: MEE55 | Serinc-domain containing serine and sphingolipid biosynthesis protein | chr4:7767292-7769426 FORWARD LENGTH=394	e-112
assembly1056_699bp	AT1G68710.1	Symbols: | ATPase E1-E2 type family protein / haloacid dehalogenase-like hydrolase family protein | chr1:25793498-25797975 REVERSE LENGTH=1200	2e-07
assembly1057_3577bp	AT3G51480.1	Symbols: ATGLR3.6, GLR3.6 | glutamate receptor 3.6 | chr3:19101256-19104681 FORWARD LENGTH=903	0
assembly1058_1487bp	AT3G51470.1	Symbols: | Protein phosphatase 2C family protein | chr3:19097924-19099244 REVERSE LENGTH=361	0
assembly1059_1052bp	AT2G34850.1	Symbols: MEE25 | NAD(P)-binding Rossmann-fold superfamily protein | chr2:14704792-14705768 REVERSE LENGTH=236	e-112
assembly1060_971bp	AT2G34850.1	Symbols: MEE25 | NAD(P)-binding Rossmann-fold superfamily protein | chr2:14704792-14705768 REVERSE LENGTH=236	e-118
assembly1061_320bp	NoHits
assembly1062_400bp	AT1G72390.1	Symbols: | CONTAINS InterPro DOMAIN/s: Spt20 family (InterPro:IPR021950); Has 8778 Blast hits to 7244 proteins in 477 species: Archae - 6; Bacteria - 326; Metazoa - 4198; Fungi - 1506; Plants - 923; Viruses - 22; Other Eukaryotes - 1797 (source: NCBI BLink). | chr1:27245455-27251218 FORWARD LENGTH=1325	9e-10
assembly1063_1589bp	AT3G03440.1	Symbols: | ARM repeat superfamily protein | chr3:815709-818568 FORWARD LENGTH=408	e-170
assembly1064_625bp	AT3G03440.1	Symbols: | ARM repeat superfamily protein | chr3:815709-818568 FORWARD LENGTH=408	2e-57
assembly1065_2143bp	AT1G16650.1	Symbols: | S-adenosyl-L-methionine-dependent methyltransferases superfamily protein | chr1:5687994-5691101 FORWARD LENGTH=521	0
assembly1066_308bp	AT3G11980.1	Symbols: MS2, FAR2 | Jojoba acyl CoA reductase-related male sterility protein | chr3:3814484-3816927 FORWARD LENGTH=616	2e-59
assembly1067_1154bp	AT5G53890.1	Symbols: PSKR2, AtPSKR2 | phytosylfokine-alpha receptor 2 | chr5:21877235-21880345 FORWARD LENGTH=1036	9e-13
assembly1068_1025bp	NoHits
assembly1069_1496bp	AT5G06510.1	Symbols: NF-YA10 | nuclear factor Y, subunit A10 | chr5:1985439-1986591 FORWARD LENGTH=269	e-116
assembly1070_1098bp	AT2G40475.1	Symbols: | unknown protein; BEST Arabidopsis thaliana protein match is: unknown protein (TAIR:AT3G56260.2); Has 477 Blast hits to 219 proteins in 41 species: Archae - 0; Bacteria - 4; Metazoa - 91; Fungi - 61; Plants - 144; Viruses - 0; Other Eukaryotes - 177 (source: NCBI BLink). | chr2:16907222-16907803 REVERSE LENGTH=193	2e-46
assembly1071_776bp	AT2G40475.1	Symbols: | unknown protein; BEST Arabidopsis thaliana protein match is: unknown protein (TAIR:AT3G56260.2); Has 477 Blast hits to 219 proteins in 41 species: Archae - 0; Bacteria - 4; Metazoa - 91; Fungi - 61; Plants - 144; Viruses - 0; Other Eukaryotes - 177 (source: NCBI BLink). | chr2:16907222-16907803 REVERSE LENGTH=193	4e-19
assembly1072_322bp	AT3G56160.1	Symbols: | Sodium Bile acid symporter family | chr3:20837733-20841541 REVERSE LENGTH=436	1e-10
assembly1073_1784bp	AT3G15520.1	Symbols: | Cyclophilin-like peptidyl-prolyl cis-trans isomerase family protein | chr3:5249739-5252432 REVERSE LENGTH=466	0
assembly1074_1869bp	AT3G15520.1	Symbols: | Cyclophilin-like peptidyl-prolyl cis-trans isomerase family protein | chr3:5249739-5252432 REVERSE LENGTH=466	0
assembly1075_379bp	AT1G36370.1	Symbols: SHM7 | serine hydroxymethyltransferase 7 | chr1:13696240-13698576 REVERSE LENGTH=598	5e-21
assembly1076_1038bp	AT2G30630.2	Symbols: | P-loop containing nucleoside triphosphate hydrolases superfamily protein | chr2:13046883-13049106 REVERSE LENGTH=552	5e-37
assembly1077_606bp	AT1G06750.2	Symbols: | P-loop containing nucleoside triphosphate hydrolases superfamily protein | chr1:2073882-2076350 FORWARD LENGTH=526	e-135
assembly1078_893bp	AT2G30630.2	Symbols: | P-loop containing nucleoside triphosphate hydrolases superfamily protein | chr2:13046883-13049106 REVERSE LENGTH=552	6e-41
assembly1079_1820bp	AT3G09900.1	Symbols: ATRABE1E, ATRAB8E, RABE1e | RAB GTPase homolog E1E | chr3:3034687-3036379 FORWARD LENGTH=218	e-105
assembly1080_1273bp	AT5G03520.1	Symbols: ATRAB8C, ATRABE1D, ATRAB-E1D, RAB-E1D, RAB8C | RAB GTPase homolog 8C | chr5:883679-885158 FORWARD LENGTH=216	e-120
assembly1081_1093bp	AT5G64140.1	Symbols: RPS28 | ribosomal protein S28 | chr5:25667529-25667723 REVERSE LENGTH=64	9e-27
assembly1082_411bp	AT5G64140.1	Symbols: RPS28 | ribosomal protein S28 | chr5:25667529-25667723 REVERSE LENGTH=64	2e-27
assembly1083_1990bp	AT3G05990.1	Symbols: | Leucine-rich repeat (LRR) family protein | chr3:1797116-1799732 REVERSE LENGTH=517	0
assembly1084_1058bp	NoHits
assembly1085_1136bp	NoHits
assembly1086_1164bp	AT3G16770.1	Symbols: RAP2.3, ATEBP, ERF72, EBP | ethylene-responsive element binding protein | chr3:5705784-5706768 FORWARD LENGTH=248	e-117
assembly1087_818bp	NoHits
assembly1088_588bp	NoHits
assembly1089_1183bp	AT5G18740.1	Symbols: | Domain of unknown function (DUF3444) | chr5:6250060-6251352 FORWARD LENGTH=430	1e-95
assembly1090_997bp	AT5G18740.1	Symbols: | Domain of unknown function (DUF3444) | chr5:6250060-6251352 FORWARD LENGTH=430	1e-74
assembly1091_667bp	AT5G47650.1	Symbols: ATNUDT2, ATNUDX2, NUDT2 | nudix hydrolase homolog 2 | chr5:19310391-19312084 REVERSE LENGTH=278	1e-43
assembly1092_1287bp	AT5G47650.1	Symbols: ATNUDT2, ATNUDX2, NUDT2 | nudix hydrolase homolog 2 | chr5:19310391-19312084 REVERSE LENGTH=278	6e-17
assembly1093_960bp	AT1G16445.1	Symbols: | S-adenosyl-L-methionine-dependent methyltransferases superfamily protein | chr1:5617811-5619303 FORWARD LENGTH=274	8e-93
assembly1094_1047bp	AT1G16445.1	Symbols: | S-adenosyl-L-methionine-dependent methyltransferases superfamily protein | chr1:5617811-5619303 FORWARD LENGTH=274	e-109
assembly1095_325bp	NoHits
assembly1096_412bp	AT5G18580.1	Symbols: FASS, TON2, EMB40, FS1, GDO, FASS 2 | tonneau 2 (TON2) | chr5:6175154-6178214 FORWARD LENGTH=480	3e-11
assembly1097_1892bp	AT5G17240.1	Symbols: SDG40 | SET domain group 40 | chr5:5666854-5668849 FORWARD LENGTH=491	0
assembly1098_1782bp	AT5G17240.1	Symbols: SDG40 | SET domain group 40 | chr5:5666854-5668849 FORWARD LENGTH=491	0
assembly1099_1719bp	AT5G17240.1	Symbols: SDG40 | SET domain group 40 | chr5:5666854-5668849 FORWARD LENGTH=491	0
assembly1100_1955bp	AT5G17240.1	Symbols: SDG40 | SET domain group 40 | chr5:5666854-5668849 FORWARD LENGTH=491	0
assembly1101_846bp	AT1G16440.1	Symbols: RSH3 | root hair specific 3 | chr1:5615841-5617632 FORWARD LENGTH=499	e-114
assembly1102_1142bp	AT4G36840.1	Symbols: | Galactose oxidase/kelch repeat superfamily protein | chr4:17352166-17352882 FORWARD LENGTH=238	2e-06
assembly1103_1301bp	AT4G36840.1	Symbols: | Galactose oxidase/kelch repeat superfamily protein | chr4:17352166-17352882 FORWARD LENGTH=238	3e-06
assembly1104_2877bp	AT5G57020.1	Symbols: NMT1, ATNMT1 | myristoyl-CoA:protein N-myristoyltransferase | chr5:23075451-23076755 FORWARD LENGTH=434	e-125
assembly1105_1154bp	AT2G20142.1	Symbols: | Toll-Interleukin-Resistance (TIR) domain family protein | chr2:8695387-8696566 FORWARD LENGTH=313	0
assembly1106_789bp	AT5G56270.1	Symbols: WRKY2, ATWRKY2 | WRKY DNA-binding protein 2 | chr5:22780816-22783137 FORWARD LENGTH=687	5e-15
assembly1107_853bp	AT5G56270.1	Symbols: WRKY2, ATWRKY2 | WRKY DNA-binding protein 2 | chr5:22780816-22783137 FORWARD LENGTH=687	7e-15
assembly1108_3572bp	AT5G56270.1	Symbols: WRKY2, ATWRKY2 | WRKY DNA-binding protein 2 | chr5:22780816-22783137 FORWARD LENGTH=687	0
assembly1109_979bp	AT1G24450.1	Symbols: NFD2 | Ribonuclease III family protein | chr1:8664201-8665077 FORWARD LENGTH=191	4e-43
assembly1110_1069bp	AT1G24450.1	Symbols: NFD2 | Ribonuclease III family protein | chr1:8664201-8665077 FORWARD LENGTH=191	8e-43
assembly1111_1435bp	AT1G76810.1	Symbols: | eukaryotic translation initiation factor 2 (eIF-2) family protein | chr1:28831366-28836310 REVERSE LENGTH=1294	2e-52
assembly1112_1369bp	AT1G76810.1	Symbols: | eukaryotic translation initiation factor 2 (eIF-2) family protein | chr1:28831366-28836310 REVERSE LENGTH=1294	4e-57
assembly1113_376bp	AT5G03690.1	Symbols: | Aldolase superfamily protein | chr5:963389-964982 REVERSE LENGTH=393	1e-62
assembly1114_1237bp	AT2G22800.1	Symbols: HAT9 | Homeobox-leucine zipper protein family | chr2:9704949-9706048 REVERSE LENGTH=274	e-137
assembly1115_1333bp	AT2G22800.1	Symbols: HAT9 | Homeobox-leucine zipper protein family | chr2:9704949-9706048 REVERSE LENGTH=274	e-130
assembly1116_1418bp	AT2G22800.1	Symbols: HAT9 | Homeobox-leucine zipper protein family | chr2:9704949-9706048 REVERSE LENGTH=274	2e-99
assembly1117_1782bp	NoHits
assembly1118_1015bp	NoHits
assembly1119_998bp	AT4G00220.1	Symbols: LBD30, JLO | Lateral organ boundaries (LOB) domain family protein | chr4:90147-92087 FORWARD LENGTH=228	e-104
assembly1120_728bp	AT1G29850.3	Symbols: | double-stranded DNA-binding family protein | chr1:10447866-10449691 FORWARD LENGTH=151	4e-16
assembly1121_1387bp	NoHits
assembly1122_706bp	NoHits
assembly1123_1980bp	AT3G31430.1	Symbols: | unknown protein; FUNCTIONS IN: molecular_function unknown; INVOLVED IN: biological_process unknown; LOCATED IN: endomembrane system; BEST Arabidopsis thaliana protein match is: unknown protein (TAIR:AT5G18636.1); Has 295 Blast hits to 291 proteins in 12 species: Archae - 0; Bacteria - 0; Metazoa - 0; Fungi - 0; Plants - 295; Viruses - 0; Other Eukaryotes - 0 (source: NCBI BLink). | chr…	6e-25
assembly1124_1140bp	AT3G31430.1	Symbols: | unknown protein; FUNCTIONS IN: molecular_function unknown; INVOLVED IN: biological_process unknown; LOCATED IN: endomembrane system; BEST Arabidopsis thaliana protein match is: unknown protein (TAIR:AT5G18636.1); Has 295 Blast hits to 291 proteins in 12 species: Archae - 0; Bacteria - 0; Metazoa - 0; Fungi - 0; Plants - 295; Viruses - 0; Other Eukaryotes - 0 (source: NCBI BLink). | chr…	2e-19
assembly1125_1742bp	AT2G27760.1	Symbols: ATIPT2, IPPT, IPT2 | tRNAisopentenyltransferase 2 | chr2:11824860-11827432 FORWARD LENGTH=466	0
assembly1126_1029bp	AT2G27760.1	Symbols: ATIPT2, IPPT, IPT2 | tRNAisopentenyltransferase 2 | chr2:11824860-11827432 FORWARD LENGTH=466	e-104
assembly1127_1663bp	AT2G27760.1	Symbols: ATIPT2, IPPT, IPT2 | tRNAisopentenyltransferase 2 | chr2:11824860-11827432 FORWARD LENGTH=466	0
assembly1128_844bp	AT4G29690.1	Symbols: | Alkaline-phosphatase-like family protein | chr4:14541084-14542457 REVERSE LENGTH=457	0
assembly1129_1629bp	AT2G31990.1	Symbols: | Exostosin family protein | chr2:13611500-13613551 REVERSE LENGTH=479	0
assembly1130_557bp	AT4G32272.2	Symbols: | Nucleotide/sugar transporter family protein | chr4:15577195-15579689 REVERSE LENGTH=359	1e-51
assembly1131_563bp	AT4G32272.2	Symbols: | Nucleotide/sugar transporter family protein | chr4:15577195-15579689 REVERSE LENGTH=359	7e-42
assembly1132_4010bp	AT5G37360.1	Symbols: | unknown protein; FUNCTIONS IN: molecular_function unknown; INVOLVED IN: biological_process unknown; LOCATED IN: chloroplast thylakoid membrane, chloroplast; EXPRESSED IN: 23 plant structures; EXPRESSED DURING: 13 growth stages; Has 1807 Blast hits to 1807 proteins in 277 species: Archae - 0; Bacteria - 0; Metazoa - 736; Fungi - 347; Plants - 385; Viruses - 0; Other Eukaryotes - 339 (so…	e-131
assembly1133_482bp	AT5G18580.1	Symbols: FASS, TON2, EMB40, FS1, GDO, FASS 2 | tonneau 2 (TON2) | chr5:6175154-6178214 FORWARD LENGTH=480	8e-57
assembly1134_616bp	AT3G23635.1	Symbols: RTFL13 | ROTUNDIFOLIA like 13 | chr3:8497941-8498072 REVERSE LENGTH=43	8e-17
assembly1135_985bp	AT3G23635.1	Symbols: RTFL13 | ROTUNDIFOLIA like 13 | chr3:8497941-8498072 REVERSE LENGTH=43	1e-15
assembly1136_1282bp	AT4G22753.1	Symbols: SMO1-3, ATSMO1, SMO1, ATSMO1-3 | sterol 4-alpha methyl oxidase 1-3 | chr4:11952019-11953609 REVERSE LENGTH=291	0
assembly1137_1093bp	AT5G05210.1	Symbols: | Surfeit locus protein 6 | chr5:1548198-1549534 FORWARD LENGTH=386	e-101
assembly1138_512bp	AT1G15940.1	Symbols: | Tudor/PWWP/MBT superfamily protein | chr1:5473672-5478050 FORWARD LENGTH=990	2e-19
assembly1139_677bp	AT1G15940.1	Symbols: | Tudor/PWWP/MBT superfamily protein | chr1:5473672-5478050 FORWARD LENGTH=990	5e-27
assembly1140_491bp	AT1G15940.1	Symbols: | Tudor/PWWP/MBT superfamily protein | chr1:5473672-5478050 FORWARD LENGTH=990	2e-18
assembly1141_409bp	AT1G55490.1	Symbols: CPN60B, LEN1 | chaperonin 60 beta | chr1:20715717-20718673 REVERSE LENGTH=600	1e-18
assembly1142_636bp	AT1G55490.1	Symbols: CPN60B, LEN1 | chaperonin 60 beta | chr1:20715717-20718673 REVERSE LENGTH=600	7e-19
assembly1143_1055bp	NoHits
assembly1144_1288bp	AT5G08460.1	Symbols: | GDSL-like Lipase/Acylhydrolase superfamily protein | chr5:2733220-2735351 FORWARD LENGTH=385	0
assembly1145_667bp	AT5G43260.1	Symbols: | chaperone protein dnaJ-related | chr5:17357693-17357986 REVERSE LENGTH=97	1e-61
assembly1146_895bp	AT5G14730.1	Symbols: | unknown protein; CONTAINS InterPro DOMAIN/s: Protein of unknown function DUF1645 (InterPro:IPR012442); BEST Arabidopsis thaliana protein match is: unknown protein (TAIR:AT3G01513.1); Has 85 Blast hits to 83 proteins in 14 species: Archae - 0; Bacteria - 9; Metazoa - 0; Fungi - 0; Plants - 76; Viruses - 0; Other Eukaryotes - 0 (source: NCBI BLink). | chr5:4756282-4757022 FORWARD LENGTH=…	3e-56
assembly1147_747bp	AT5G14730.1	Symbols: | unknown protein; CONTAINS InterPro DOMAIN/s: Protein of unknown function DUF1645 (InterPro:IPR012442); BEST Arabidopsis thaliana protein match is: unknown protein (TAIR:AT3G01513.1); Has 85 Blast hits to 83 proteins in 14 species: Archae - 0; Bacteria - 9; Metazoa - 0; Fungi - 0; Plants - 76; Viruses - 0; Other Eukaryotes - 0 (source: NCBI BLink). | chr5:4756282-4757022 FORWARD LENGTH=…	1e-48
assembly1148_1302bp	AT1G67020.1	Symbols: | unknown protein; FUNCTIONS IN: molecular_function unknown; INVOLVED IN: biological_process unknown; LOCATED IN: cellular_component unknown; EXPRESSED IN: leaf; Has 72 Blast hits to 72 proteins in 9 species: Archae - 0; Bacteria - 0; Metazoa - 0; Fungi - 0; Plants - 72; Viruses - 0; Other Eukaryotes - 0 (source: NCBI BLink). | chr1:25011008-25012987 REVERSE LENGTH=659	9e-15
assembly1149_433bp	AT1G53260.1	Symbols: | LOCATED IN: endomembrane system; BEST Arabidopsis thaliana protein match is: cobalt ion binding (TAIR:AT3G15000.1); Has 32763 Blast hits to 18534 proteins in 929 species: Archae - 22; Bacteria - 2420; Metazoa - 15140; Fungi - 5401; Plants - 5313; Viruses - 485; Other Eukaryotes - 3982 (source: NCBI BLink). | chr1:19859393-19860421 REVERSE LENGTH=271	6e-09
assembly1150_388bp	NoHits
assembly1151_3024bp	AT1G33400.1	Symbols: TPR9 | Tetratricopeptide repeat (TPR)-like superfamily protein | chr1:12104891-12109488 REVERSE LENGTH=798	0
assembly1152_2830bp	AT1G33400.1	Symbols: TPR9 | Tetratricopeptide repeat (TPR)-like superfamily protein | chr1:12104891-12109488 REVERSE LENGTH=798	0
assembly1153_3166bp	AT1G33400.1	Symbols: TPR9 | Tetratricopeptide repeat (TPR)-like superfamily protein | chr1:12104891-12109488 REVERSE LENGTH=798	0
assembly1154_1346bp	AT5G66610.2	Symbols: DAR7 | DA1-related protein 7 | chr5:26585223-26587755 FORWARD LENGTH=587	3e-07
assembly1155_1816bp	AT4G39370.3	Symbols: UBP27 | ubiquitin-specific protease 27 | chr4:18306392-18308625 FORWARD LENGTH=505	0
assembly1156_1882bp	AT4G39370.3	Symbols: UBP27 | ubiquitin-specific protease 27 | chr4:18306392-18308625 FORWARD LENGTH=505	e-180
assembly1157_1358bp	AT3G55960.1	Symbols: | Haloacid dehalogenase-like hydrolase (HAD) superfamily protein | chr3:20760797-20762892 REVERSE LENGTH=305	e-177
assembly1158_1438bp	AT3G55960.1	Symbols: | Haloacid dehalogenase-like hydrolase (HAD) superfamily protein | chr3:20760797-20762892 REVERSE LENGTH=305	e-125
assembly1159_4446bp	AT1G24440.1	Symbols: | RING/U-box superfamily protein | chr1:8662340-8663777 FORWARD LENGTH=251	e-143
assembly1160_1098bp	AT1G14820.3	Symbols: | Sec14p-like phosphatidylinositol transfer family protein | chr1:5105237-5106793 REVERSE LENGTH=252	e-136
assembly1161_356bp	NoHits
assembly1162_2065bp	AT3G18830.1	Symbols: ATPLT5, PMT5, ATPMT5 | polyol/monosaccharide transporter 5 | chr3:6489000-6491209 REVERSE LENGTH=539	0
assembly1163_3503bp	AT3G09410.1	Symbols: | Pectinacetylesterase family protein | chr3:2898243-2900984 REVERSE LENGTH=427	e-142
assembly1164_3367bp	AT3G09410.1	Symbols: | Pectinacetylesterase family protein | chr3:2898243-2900984 REVERSE LENGTH=427	0
assembly1165_3327bp	AT3G09410.1	Symbols: | Pectinacetylesterase family protein | chr3:2898243-2900984 REVERSE LENGTH=427	0
assembly1166_425bp	NoHits
assembly1167_419bp	AT5G41790.1	Symbols: CIP1 | COP1-interactive protein 1 | chr5:16727530-16732391 FORWARD LENGTH=1586	2e-10
assembly1168_437bp	NoHits
assembly1169_807bp	NoHits
assembly1170_1002bp	AT3G57490.1	Symbols: | Ribosomal protein S5 family protein | chr3:21279824-21280887 REVERSE LENGTH=276	2e-08
assembly1171_1504bp	NoHits
assembly1172_705bp	AT1G71400.1	Symbols: AtRLP12, RLP12 | receptor like protein 12 | chr1:26909905-26912448 FORWARD LENGTH=847	e-106
assembly1173_547bp	AT1G71400.1	Symbols: AtRLP12, RLP12 | receptor like protein 12 | chr1:26909905-26912448 FORWARD LENGTH=847	7e-79
assembly1174_356bp	AT4G21192.1	Symbols: | Cytochrome c oxidase biogenesis protein Cmc1-like | chr4:11294563-11295192 FORWARD LENGTH=80	9e-06
assembly1175_658bp	AT4G21192.1	Symbols: | Cytochrome c oxidase biogenesis protein Cmc1-like | chr4:11294563-11295192 FORWARD LENGTH=80	6e-53
assembly1176_735bp	AT4G21192.1	Symbols: | Cytochrome c oxidase biogenesis protein Cmc1-like | chr4:11294563-11295192 FORWARD LENGTH=80	2e-50
assembly1177_335bp	NoHits
assembly1178_1286bp	AT2G27020.1	Symbols: PAG1 | 20S proteasome alpha subunit G1 | chr2:11528515-11530858 REVERSE LENGTH=249	e-154
assembly1179_620bp	AT5G04290.1	Symbols: KTF1, SPT5L | kow domain-containing transcription factor 1 | chr5:1196069-1202653 FORWARD LENGTH=1493	9e-45
assembly1180_1550bp	AT5G04290.1	Symbols: KTF1, SPT5L | kow domain-containing transcription factor 1 | chr5:1196069-1202653 FORWARD LENGTH=1493	3e-41
assembly1181_344bp	NoHits
assembly1182_3187bp	AT4G33520.2	Symbols: PAA1, HMA6 | P-type ATP-ase 1 | chr4:16118993-16125849 FORWARD LENGTH=949	0
assembly1183_425bp	AT3G54470.1	Symbols: | uridine 5'-monophosphate synthase / UMP synthase (PYRE-F) (UMPS) | chr3:20168285-20170245 REVERSE LENGTH=476	3e-31
assembly1184_591bp	AT3G16720.1	Symbols: ATL2, TL2 | TOXICOS EN LEVADURA 2 | chr3:5692880-5693794 FORWARD LENGTH=304	8e-22
assembly1185_328bp	NoHits
assembly1186_2609bp	AT3G13222.1	Symbols: GIP1 | GBF-interacting protein 1 | chr3:4251287-4254206 REVERSE LENGTH=567	e-165
assembly1187_1157bp	AT5G25810.1	Symbols: tny | Integrase-type DNA-binding superfamily protein | chr5:8986976-8987632 REVERSE LENGTH=218	3e-93
assembly1188_1136bp	AT5G25810.1	Symbols: tny | Integrase-type DNA-binding superfamily protein | chr5:8986976-8987632 REVERSE LENGTH=218	6e-94
assembly1189_308bp	NoHits
assembly1190_326bp	ATMG00710.1	Symbols: ORF120 | Polynucleotidyl transferase, ribonuclease H-like superfamily protein | chrM:207553-207915 REVERSE LENGTH=120	6e-15
assembly1191_401bp	AT2G33630.1	Symbols: | NAD(P)-binding Rossmann-fold superfamily protein | chr2:14236951-14238734 REVERSE LENGTH=480	5e-48
assembly1192_304bp	NoHits
assembly1193_421bp	AT2G15430.1	Symbols: RBP36A, RPB35.5A, NRPB3, NRPD3, NRPE3A | DNA-directed RNA polymerase family protein | chr2:6733661-6735482 FORWARD LENGTH=319	1e-25
assembly1194_314bp	AT3G54990.1	Symbols: SMZ | Integrase-type DNA-binding superfamily protein | chr3:20373718-20376522 REVERSE LENGTH=346	2e-06
assembly1195_357bp	AT5G53200.1	Symbols: TRY | Homeodomain-like superfamily protein | chr5:21582913-21583960 FORWARD LENGTH=106	4e-14
assembly1196_488bp	AT2G30470.1	Symbols: HSI2, VAL1 | high-level expression of sugar-inducible gene 2 | chr2:12980904-12984724 REVERSE LENGTH=790	3e-77
assembly1197_306bp	AT2G32530.1	Symbols: ATCSLB03, CSLB03, ATCSLB3 | cellulose synthase-like B3 | chr2:13809283-13813487 FORWARD LENGTH=755	8e-41
assembly1198_306bp	AT3G48170.1	Symbols: ALDH10A9 | aldehyde dehydrogenase 10A9 | chr3:17786290-17789918 REVERSE LENGTH=503	6e-18
assembly1199_432bp	NoHits
assembly1200_329bp	AT3G51860.1	Symbols: CAX3, ATHCX1, CAX1-LIKE, ATCAX3 | cation exchanger 3 | chr3:19239458-19242519 FORWARD LENGTH=459	5e-11
assembly1201_344bp	AT1G68840.1	Symbols: RAV2, RAP2.8, TEM2, EDF2, AtRAV2 | related to ABI3/VP1 2 | chr1:25880442-25881500 FORWARD LENGTH=352	1e-57
assembly1202_301bp	AT3G58500.1	Symbols: PP2A-4 | protein phosphatase 2A-4 | chr3:21635503-21638911 REVERSE LENGTH=313	4e-16
assembly1203_366bp	AT4G17350.1	Symbols: | Plant protein of unknown function (DUF828) with plant pleckstrin homology-like region | chr4:9701582-9703358 FORWARD LENGTH=405	1e-16
assembly1204_403bp	AT3G46660.1	Symbols: UGT76E12 | UDP-glucosyl transferase 76E12 | chr3:17189406-17190862 REVERSE LENGTH=458	3e-83
assembly1205_334bp	AT3G18000.1	Symbols: NMT1, XPL1, PEAMT | S-adenosyl-L-methionine-dependent methyltransferases superfamily protein | chr3:6154578-6157331 FORWARD LENGTH=491	4e-09
assembly1206_354bp	NoHits
assembly1207_385bp	NoHits
assembly1208_322bp	NoHits
assembly1209_319bp	NoHits
assembly1210_415bp	AT2G01480.1	Symbols: | O-fucosyltransferase family protein | chr2:216980-220341 FORWARD LENGTH=567	3e-08
assembly1211_321bp	NoHits
assembly1212_312bp	AT1G77140.1	Symbols: VPS45, ATVPS45 | vacuolar protein sorting 45 | chr1:28984163-28987681 FORWARD LENGTH=569	1e-52
assembly1213_332bp	NoHits
assembly1214_313bp	NoHits
assembly1215_306bp	NoHits
assembly1216_304bp	AT1G16800.1	Symbols: | P-loop containing nucleoside triphosphate hydrolases superfamily protein | chr1:5745523-5755263 REVERSE LENGTH=2127	3e-17
assembly1217_311bp	AT1G01960.1	Symbols: EDA10 | SEC7-like guanine nucleotide exchange family protein | chr1:330830-337582 REVERSE LENGTH=1750	9e-52
assembly1218_368bp	NoHits
assembly1219_347bp	AT5G50700.1	Symbols: HSD1 | hydroxysteroid dehydrogenase 1 | chr5:20623259-20624995 REVERSE LENGTH=349	2e-07
assembly1220_331bp	AT5G52650.1	Symbols: | RNA binding Plectin/S10 domain-containing protein | chr5:21355781-21357003 REVERSE LENGTH=179	6e-58
assembly1221_310bp	AT3G10270.1	Symbols: GYRB1 | DNA GYRASE B1 | chr3:3173805-3179756 REVERSE LENGTH=772	2e-06
assembly1222_310bp	NoHits
assembly1223_326bp	NoHits
assembly1224_384bp	AT2G24940.1	Symbols: AtMAPR2, MAPR2 | membrane-associated progesterone binding protein 2 | chr2:10609447-10609749 FORWARD LENGTH=100	2e-08
assembly1225_303bp	NoHits
assembly1226_383bp	AT2G37380.1	Symbols: | unknown protein; BEST Arabidopsis thaliana protein match is: unknown protein (TAIR:AT2G39370.1); Has 1284 Blast hits to 422 proteins in 114 species: Archae - 0; Bacteria - 90; Metazoa - 125; Fungi - 151; Plants - 136; Viruses - 0; Other Eukaryotes - 782 (source: NCBI BLink). | chr2:15686828-15687793 FORWARD LENGTH=321	2e-22
assembly1227_315bp	AT2G47320.1	Symbols: | Cyclophilin-like peptidyl-prolyl cis-trans isomerase family protein | chr2:19427711-19428839 FORWARD LENGTH=230	2e-08
assembly1228_468bp	AT1G62900.1	Symbols: | S-adenosyl-L-methionine-dependent methyltransferases superfamily protein | chr1:23297792-23298536 FORWARD LENGTH=205	2e-50
assembly1229_430bp	AT5G42770.2	Symbols: | Maf-like protein | chr5:17152147-17154355 FORWARD LENGTH=233	4e-11
assembly1230_418bp	NoHits
assembly1231_1126bp	NoHits
assembly1232_465bp	AT5G51640.1	Symbols: YLS7, TBL17 | Plant protein of unknown function (DUF828) | chr5:20975401-20977378 REVERSE LENGTH=501	6e-39
assembly1233_353bp	NoHits
assembly1234_428bp	AT1G74870.1	Symbols: | RING/U-box superfamily protein | chr1:28127093-28128275 FORWARD LENGTH=289	1e-17
assembly1235_2759bp	AT1G25360.1	Symbols: | Pentatricopeptide repeat (PPR) superfamily protein | chr1:8894428-8896800 FORWARD LENGTH=790	0
assembly1236_1450bp	NoHits
assembly1237_435bp	AT5G47060.1	Symbols: | Protein of unknown function (DUF581) | chr5:19116843-19117639 FORWARD LENGTH=177	2e-40
assembly1238_321bp	NoHits
assembly1239_546bp	AT1G72520.1	Symbols: LOX4 | PLAT/LH2 domain-containing lipoxygenase family protein | chr1:27308611-27312589 FORWARD LENGTH=926	5e-10
assembly1240_728bp	AT1G79770.1	Symbols: | Protein of unknown function (DUF1677) | chr1:30014371-30014874 FORWARD LENGTH=167	9e-80
assembly1241_624bp	AT4G22360.1	Symbols: | SWIB complex BAF60b domain-containing protein | chr4:11807811-11809660 FORWARD LENGTH=385	3e-17
assembly1242_375bp	NoHits
assembly1243_475bp	AT5G65207.1	Symbols: | unknown protein; BEST Arabidopsis thaliana protein match is: unknown protein (TAIR:AT5G10040.1); Has 30201 Blast hits to 17322 proteins in 780 species: Archae - 12; Bacteria - 1396; Metazoa - 17338; Fungi - 3422; Plants - 5037; Viruses - 0; Other Eukaryotes - 2996 (source: NCBI BLink). | chr5:26052364-26052585 REVERSE LENGTH=73	1e-29
assembly1244_955bp	AT2G14100.1	Symbols: CYP705A13 | cytochrome P450, family 705, subfamily A, polypeptide 13 | chr2:5934733-5936371 REVERSE LENGTH=518	3e-85
assembly1245_498bp	AT1G09794.1	Symbols: | Cox19 family protein (CHCH motif) | chr1:3172196-3173321 FORWARD LENGTH=63	6e-37
assembly1246_318bp	AT1G24320.1	Symbols: | Six-hairpin glycosidases superfamily protein | chr1:8626437-8630935 REVERSE LENGTH=789	5e-50
assembly1247_549bp	NoHits
assembly1248_537bp	AT1G04280.1	Symbols: | P-loop containing nucleoside triphosphate hydrolases superfamily protein | chr1:1143643-1146541 REVERSE LENGTH=534	2e-67
assembly1249_335bp	NoHits
assembly1250_385bp	AT5G47930.1	Symbols: | Zinc-binding ribosomal protein family protein | chr5:19406423-19407329 REVERSE LENGTH=84	2e-14
assembly1251_518bp	NoHits
assembly1252_704bp	AT5G62200.1	Symbols: | Embryo-specific protein 3, (ATS3) | chr5:24984463-24985674 REVERSE LENGTH=190	4e-98
assembly1253_514bp	AT1G80530.1	Symbols: | Major facilitator superfamily protein | chr1:30278224-30280247 REVERSE LENGTH=561	8e-84
assembly1254_1137bp	AT5G45800.1	Symbols: MEE62 | Leucine-rich repeat protein kinase family protein | chr5:18575765-18578972 REVERSE LENGTH=666	1e-08
assembly1255_446bp	NoHits
assembly1256_448bp	NoHits
assembly1257_730bp	AT2G44380.1	Symbols: | Cysteine/Histidine-rich C1 domain family protein | chr2:18323590-18324333 REVERSE LENGTH=247	e-118
assembly1258_474bp	AT1G54270.1	Symbols: EIF4A-2 | eif4a-2 | chr1:20260495-20262018 FORWARD LENGTH=412	e-104
assembly1259_811bp	AT1G67000.1	Symbols: | Protein kinase superfamily protein | chr1:25004217-25007604 REVERSE LENGTH=892	2e-62
assembly1260_326bp	NoHits
assembly1261_381bp	AT2G32850.2	Symbols: | Protein kinase superfamily protein | chr2:13935448-13937977 REVERSE LENGTH=670	3e-07
assembly1262_740bp	AT5G22870.1	Symbols: | Late embryogenesis abundant (LEA) hydroxyproline-rich glycoprotein family | chr5:7647056-7647679 REVERSE LENGTH=207	e-104
assembly1263_571bp	AT1G73600.2	Symbols: | S-adenosyl-L-methionine-dependent methyltransferases superfamily protein | chr1:27669224-27673400 FORWARD LENGTH=504	e-101
assembly1264_488bp	AT5G21080.1	Symbols: | Uncharacterized protein | chr5:7158035-7162906 REVERSE LENGTH=1025	2e-92
assembly1265_404bp	AT1G68060.1	Symbols: ATMAP70-1, MAP70-1 | microtubule-associated proteins 70-1 | chr1:25511392-25514226 REVERSE LENGTH=622	2e-09
assembly1266_789bp	AT1G19240.1	Symbols: | unknown protein; Has 24 Blast hits to 24 proteins in 11 species: Archae - 0; Bacteria - 0; Metazoa - 0; Fungi - 0; Plants - 24; Viruses - 0; Other Eukaryotes - 0 (source: NCBI BLink). | chr1:6649562-6650384 REVERSE LENGTH=104	3e-32
assembly1267_396bp	AT3G01015.1	Symbols: | TPX2 (targeting protein for Xklp2) protein family | chr3:1798-4017 REVERSE LENGTH=488	1e-25
assembly1268_839bp	AT5G38510.1	Symbols: | Rhomboid-related intramembrane serine protease family protein | chr5:15417839-15420002 REVERSE LENGTH=434	2e-65
assembly1269_969bp	AT3G11230.2	Symbols: | Yippee family putative zinc-binding protein | chr3:3516683-3518193 FORWARD LENGTH=162	6e-12
assembly1270_763bp	AT3G09085.1	Symbols: | Protein of unknown function (DUF962) | chr3:2782238-2782576 FORWARD LENGTH=112	2e-72
assembly1271_701bp	AT2G44910.1	Symbols: ATHB4, ATHB-4, HB4 | homeobox-leucine zipper protein 4 | chr2:18517887-18519525 REVERSE LENGTH=318	5e-65
assembly1272_813bp	AT5G56670.1	Symbols: | Ribosomal protein S30 family protein | chr5:22935413-22935981 REVERSE LENGTH=62	3e-09
assembly1273_634bp	AT5G03610.1	Symbols: | GDSL-like Lipase/Acylhydrolase superfamily protein | chr5:915650-918326 FORWARD LENGTH=359	e-126
assembly1274_627bp	AT4G16447.1	Symbols: | unknown protein; Has 30201 Blast hits to 17322 proteins in 780 species: Archae - 12; Bacteria - 1396; Metazoa - 17338; Fungi - 3422; Plants - 5037; Viruses - 0; Other Eukaryotes - 2996 (source: NCBI BLink). | chr4:9278829-9279206 FORWARD LENGTH=125	1e-48
assembly1275_995bp	AT5G62930.1	Symbols: | SGNH hydrolase-type esterase superfamily protein | chr5:25254912-25256357 FORWARD LENGTH=242	e-170
assembly1276_369bp	NoHits
assembly1277_404bp	NoHits
assembly1278_416bp	NoHits
assembly1279_444bp	NoHits
assembly1280_605bp	NoHits
assembly1281_345bp	AT4G31670.1	Symbols: UBP18 | ubiquitin-specific protease 18 | chr4:15336007-15339506 REVERSE LENGTH=631	4e-21
assembly1282_376bp	NoHits
assembly1283_1711bp	AT1G77360.1	Symbols: | Tetratricopeptide repeat (TPR)-like superfamily protein | chr1:29071983-29073536 REVERSE LENGTH=517	0
assembly1284_318bp	NoHits
assembly1285_305bp	NoHits
assembly1286_434bp	AT2G40100.1	Symbols: LHCB4.3 | light harvesting complex photosystem II | chr2:16745884-16747190 FORWARD LENGTH=276	6e-07
assembly1287_363bp	NoHits
assembly1288_701bp	AT2G36250.1	Symbols: FTSZ2-1, ATFTSZ2-1 | Tubulin/FtsZ family protein | chr2:15197661-15199932 REVERSE LENGTH=478	4e-11
assembly1289_382bp	AT5G28040.1	Symbols: | DNA-binding storekeeper protein-related transcriptional regulator | chr5:10037654-10038937 REVERSE LENGTH=427	5e-17
assembly1290_340bp	AT2G14835.1	Symbols: | RING/U-box superfamily protein | chr2:6367238-6370610 FORWARD LENGTH=343	1e-15
assembly1291_320bp	AT5G59080.1	Symbols: | unknown protein; FUNCTIONS IN: molecular_function unknown; INVOLVED IN: response to oxidative stress; LOCATED IN: chloroplast; EXPRESSED IN: 18 plant structures; EXPRESSED DURING: 9 growth stages; BEST Arabidopsis thaliana protein match is: unknown protein (TAIR:AT3G46880.1); Has 1807 Blast hits to 1807 proteins in 277 species: Archae - 0; Bacteria - 0; Metazoa - 736; Fungi - 347; Plan…	5e-20
assembly1292_686bp	NoHits
assembly1293_1223bp	NoHits
assembly1294_444bp	AT3G47600.1	Symbols: MYB94, ATMYBCP70, ATMYB94 | myb domain protein 94 | chr3:17539627-17541035 REVERSE LENGTH=333	2e-13
assembly1295_605bp	AT1G57660.1	Symbols: | Translation protein SH3-like family protein | chr1:21355567-21356364 FORWARD LENGTH=164	4e-60
assembly1296_487bp	AT1G44170.1	Symbols: ALDH3H1, ALDH4 | aldehyde dehydrogenase 3H1 | chr1:16796564-16800031 REVERSE LENGTH=484	6e-49
assembly1297_388bp	NoHits
assembly1298_474bp	AT1G74840.1	Symbols: | Homeodomain-like superfamily protein | chr1:28116201-28117317 REVERSE LENGTH=265	3e-57
assembly1299_657bp	ATMG00860.1	Symbols: ORF158 | DNA/RNA polymerases superfamily protein | chrM:235916-236392 FORWARD LENGTH=158	7e-38
assembly1300_503bp	NoHits
assembly1301_372bp	AT3G17820.1	Symbols: ATGSKB6, GLN1.3, GLN1;3 | glutamine synthetase 1.3 | chr3:6097503-6099408 FORWARD LENGTH=354	3e-86
assembly1302_974bp	AT3G12480.1	Symbols: NF-YC11 | nuclear factor Y, subunit C11 | chr3:3958065-3960278 FORWARD LENGTH=293	4e-70
assembly1303_383bp	NoHits
assembly1304_540bp	AT1G50030.1	Symbols: TOR | target of rapamycin | chr1:18522626-18539619 REVERSE LENGTH=2481	1e-06
assembly1305_850bp	AT1G80530.1	Symbols: | Major facilitator superfamily protein | chr1:30278224-30280247 REVERSE LENGTH=561	e-105
assembly1306_314bp	NoHits
assembly1307_374bp	NoHits
assembly1308_573bp	NoHits
assembly1309_347bp	NoHits
assembly1310_422bp	AT5G59140.1	Symbols: | BTB/POZ domain-containing protein | chr5:23874696-23875631 REVERSE LENGTH=96	4e-13
assembly1311_411bp	AT5G58060.2	Symbols: YKT61, ATYKT61, ATGP1 | SNARE-like superfamily protein | chr5:23498277-23500128 FORWARD LENGTH=221	5e-11
assembly1312_1147bp	NoHits
assembly1313_1136bp	AT3G57710.1	Symbols: | Protein kinase superfamily protein | chr3:21386233-21387288 REVERSE LENGTH=351	e-131
assembly1314_486bp	AT4G38920.1	Symbols: AVA-P3, ATVHA-C3, VHA-C3 | vacuolar-type H(+)-ATPase C3 | chr4:18147330-18148853 FORWARD LENGTH=164	2e-10
assembly1315_421bp	AT1G73180.1	Symbols: | Eukaryotic translation initiation factor eIF2A family protein | chr1:27518335-27521432 FORWARD LENGTH=513	4e-09
assembly1316_826bp	AT5G49840.1	Symbols: | ATP-dependent Clp protease | chr5:20255243-20259035 FORWARD LENGTH=608	2e-29
assembly1317_568bp	AT4G09040.1	Symbols: | RNA-binding (RRM/RBD/RNP motifs) family protein | chr4:5795075-5797315 REVERSE LENGTH=304	5e-06
assembly1318_2740bp	AT5G41330.1	Symbols: | BTB/POZ domain with WD40/YVTN repeat-like protein | chr5:16536452-16537828 REVERSE LENGTH=458	0
assembly1319_498bp	NoHits
assembly1320_332bp	AT4G24690.1	Symbols: | ubiquitin-associated (UBA)/TS-N domain-containing protein / octicosapeptide/Phox/Bemp1 (PB1) domain-containing protein | chr4:12741191-12744202 FORWARD LENGTH=704	6e-08
assembly1321_326bp	NoHits
assembly1322_340bp	NoHits
assembly1323_1926bp	AT3G07740.4	Symbols: ADA2A | homolog of yeast ADA2 2A | chr3:2470014-2473062 REVERSE LENGTH=555	0
assembly1324_1849bp	AT3G07740.4	Symbols: ADA2A | homolog of yeast ADA2 2A | chr3:2470014-2473062 REVERSE LENGTH=555	0
assembly1325_560bp	AT5G15870.1	Symbols: | glycosyl hydrolase family 81 protein | chr5:5182641-5184878 REVERSE LENGTH=745	4e-11
assembly1326_856bp	NoHits
assembly1327_784bp	AT4G22490.1	Symbols: | Bifunctional inhibitor/lipid-transfer protein/seed storage 2S albumin superfamily protein | chr4:11849933-11850295 REVERSE LENGTH=120	3e-50
assembly1328_381bp	NoHits
assembly1329_311bp	AT3G55800.1	Symbols: SBPASE | sedoheptulose-bisphosphatase | chr3:20709640-20711421 FORWARD LENGTH=393	7e-06
assembly1330_2042bp	AT1G27920.1	Symbols: MAP65-8 | microtubule-associated protein 65-8 | chr1:9727106-9729848 FORWARD LENGTH=562	0
assembly1331_376bp	NoHits
assembly1332_359bp	AT5G27700.1	Symbols: | Ribosomal protein S21e | chr5:9807541-9808048 REVERSE LENGTH=82	4e-08
assembly1333_312bp	NoHits
assembly1334_1085bp	AT1G74180.1	Symbols: AtRLP14, RLP14 | receptor like protein 14 | chr1:27897197-27900908 REVERSE LENGTH=976	e-101
assembly1335_577bp	AT5G61060.2	Symbols: HDA05 | histone deacetylase 5 | chr5:24567137-24570917 REVERSE LENGTH=664	3e-31
assembly1336_397bp	NoHits
assembly1337_364bp	NoHits
assembly1338_382bp	NoHits
assembly1339_768bp	AT5G57010.1	Symbols: | calmodulin-binding family protein | chr5:23068207-23070203 FORWARD LENGTH=495	7e-94
assembly1340_685bp	AT5G57010.1	Symbols: | calmodulin-binding family protein | chr5:23068207-23070203 FORWARD LENGTH=495	e-122
assembly1341_556bp	AT1G58350.1	Symbols: ZW18 | Putative serine esterase family protein | chr1:21663131-21666827 REVERSE LENGTH=794	1e-07
assembly1342_450bp	AT5G67110.1	Symbols: ALC | basic helix-loop-helix (bHLH) DNA-binding superfamily protein | chr5:26785332-26786338 REVERSE LENGTH=210	6e-21
assembly1343_369bp	AT1G14610.1	Symbols: TWN2, VALRS | valyl-tRNA synthetase / valine--tRNA ligase (VALRS) | chr1:5008502-5014486 REVERSE LENGTH=1108	2e-35
assembly1344_436bp	AT1G14610.1	Symbols: TWN2, VALRS | valyl-tRNA synthetase / valine--tRNA ligase (VALRS) | chr1:5008502-5014486 REVERSE LENGTH=1108	8e-37
assembly1345_1932bp	AT4G37250.1	Symbols: | Leucine-rich repeat protein kinase family protein | chr4:17527789-17530191 REVERSE LENGTH=768	0
assembly1346_448bp	AT4G26940.1	Symbols: | Galactosyltransferase family protein | chr4:13529911-13532387 REVERSE LENGTH=407	4e-09
assembly1347_1199bp	AT5G18290.1	Symbols: SIP1;2, SIP1B | Aquaporin-like superfamily protein | chr5:6055198-6056407 REVERSE LENGTH=243	e-127
assembly1348_1906bp	AT5G18290.1	Symbols: SIP1;2, SIP1B | Aquaporin-like superfamily protein | chr5:6055198-6056407 REVERSE LENGTH=243	2e-72
assembly1349_1113bp	AT1G14530.1	Symbols: THH1 | Protein of unknown function (DUF1084) | chr1:4971420-4973597 REVERSE LENGTH=293	e-132
assembly1350_444bp	AT3G26290.1	Symbols: CYP71B26 | cytochrome P450, family 71, subfamily B, polypeptide 26 | chr3:9632770-9634439 REVERSE LENGTH=500	2e-09
assembly1351_376bp	AT3G14840.2	Symbols: | Leucine-rich repeat transmembrane protein kinase | chr3:4988271-4993891 FORWARD LENGTH=1020	6e-13
assembly1352_306bp	AT1G07180.1	Symbols: ATNDI1, NDA1 | alternative NAD(P)H dehydrogenase 1 | chr1:2204414-2206773 FORWARD LENGTH=510	2e-44
assembly1353_494bp	AT1G17615.1	Symbols: | Disease resistance protein (TIR-NBS class) | chr1:6059441-6060667 FORWARD LENGTH=380	4e-47
assembly1354_692bp	AT3G58410.1	Symbols: | TRAF-like family protein | chr3:21604871-21606229 REVERSE LENGTH=328	1e-40
assembly1355_375bp	AT3G15354.1	Symbols: SPA3 | SPA1-related 3 | chr3:5169327-5172480 REVERSE LENGTH=837	6e-55
assembly1356_672bp	NoHits
assembly1357_400bp	NoHits
assembly1358_331bp	AT4G15780.1	Symbols: ATVAMP724, VAMP724 | vesicle-associated membrane protein 724 | chr4:8980081-8981697 REVERSE LENGTH=222	2e-07
assembly1359_2859bp	AT1G55040.1	Symbols: | zinc finger (Ran-binding) family protein | chr1:20534895-20538901 FORWARD LENGTH=849	0
assembly1360_2984bp	AT1G55040.1	Symbols: | zinc finger (Ran-binding) family protein | chr1:20534895-20538901 FORWARD LENGTH=849	0
assembly1361_899bp	AT1G32740.1	Symbols: | SBP (S-ribonuclease binding protein) family protein | chr1:11844883-11846082 FORWARD LENGTH=312	6e-21
assembly1362_508bp	NoHits
assembly1363_2355bp	AT1G75580.1	Symbols: | SAUR-like auxin-responsive protein family | chr1:28377530-28377856 FORWARD LENGTH=108	1e-37
assembly1364_320bp	NoHits
assembly1365_686bp	AT1G29350.1	Symbols: | Kinase-related protein of unknown function (DUF1296) | chr1:10268761-10273613 REVERSE LENGTH=831	7e-07
assembly1366_373bp	NoHits
assembly1367_338bp	AT1G31300.1	Symbols: | TRAM, LAG1 and CLN8 (TLC) lipid-sensing domain containing protein | chr1:11194308-11195955 FORWARD LENGTH=278	2e-08
assembly1368_381bp	AT3G06290.1	Symbols: | SAC3/GANP/Nin1/mts3/eIF-3 p25 family | chr3:1899123-1907297 REVERSE LENGTH=1697	3e-06
assembly1369_422bp	AT4G20020.1	Symbols: | unknown protein; BEST Arabidopsis thaliana protein match is: unknown protein (TAIR:AT5G44780.1); Has 28928 Blast hits to 16023 proteins in 1033 species: Archae - 4; Bacteria - 4155; Metazoa - 15463; Fungi - 2938; Plants - 3091; Viruses - 205; Other Eukaryotes - 3072 (source: NCBI BLink). | chr4:10844433-10846085 REVERSE LENGTH=419	5e-51
assembly1370_1297bp	AT5G50740.3	Symbols: | Heavy metal transport/detoxification superfamily protein | chr5:20635983-20637970 REVERSE LENGTH=290	2e-81
assembly1371_354bp	NoHits
assembly1372_584bp	AT3G16090.1	Symbols: | RING/U-box superfamily protein | chr3:5456513-5458694 FORWARD LENGTH=492	3e-49
assembly1373_1199bp	AT4G23515.1	Symbols: | Toll-Interleukin-Resistance (TIR) domain family protein | chr4:12271382-12272842 REVERSE LENGTH=331	2e-77
assembly1374_1113bp	AT4G23515.1	Symbols: | Toll-Interleukin-Resistance (TIR) domain family protein | chr4:12271382-12272842 REVERSE LENGTH=331	9e-82
assembly1375_2483bp	AT1G21280.1	Symbols: | CONTAINS InterPro DOMAIN/s: Retrotransposon gag protein (InterPro:IPR005162); Has 707 Blast hits to 705 proteins in 25 species: Archae - 0; Bacteria - 0; Metazoa - 4; Fungi - 0; Plants - 703; Viruses - 0; Other Eukaryotes - 0 (source: NCBI BLink). | chr1:7447690-7448403 REVERSE LENGTH=237	2e-30
assembly1376_544bp	AT1G14820.3	Symbols: | Sec14p-like phosphatidylinositol transfer family protein | chr1:5105237-5106793 REVERSE LENGTH=252	4e-77
assembly1377_472bp	AT1G14820.3	Symbols: | Sec14p-like phosphatidylinositol transfer family protein | chr1:5105237-5106793 REVERSE LENGTH=252	2e-83
assembly1378_370bp	AT5G62000.1	Symbols: ARF2, ARF1-BP, HSS, ORE14 | auxin response factor 2 | chr5:24910859-24914680 FORWARD LENGTH=859	9e-40
assembly1379_1309bp	AT5G57780.1	Symbols: | EXPRESSED IN: 18 plant structures; EXPRESSED DURING: 12 growth stages; BEST Arabidopsis thaliana protein match is: sequence-specific DNA binding transcription factors (TAIR:AT4G30410.1); Has 123 Blast hits to 123 proteins in 11 species: Archae - 0; Bacteria - 0; Metazoa - 0; Fungi - 0; Plants - 123; Viruses - 0; Other Eukaryotes - 0 (source: NCBI BLink). | chr5:23405505-23406008 REVERS…	4e-82
assembly1380_1142bp	AT5G57780.1	Symbols: | EXPRESSED IN: 18 plant structures; EXPRESSED DURING: 12 growth stages; BEST Arabidopsis thaliana protein match is: sequence-specific DNA binding transcription factors (TAIR:AT4G30410.1); Has 123 Blast hits to 123 proteins in 11 species: Archae - 0; Bacteria - 0; Metazoa - 0; Fungi - 0; Plants - 123; Viruses - 0; Other Eukaryotes - 0 (source: NCBI BLink). | chr5:23405505-23406008 REVERS…	7e-83
assembly1381_892bp	AT2G28700.1	Symbols: AGL46 | AGAMOUS-like 46 | chr2:12317384-12318724 REVERSE LENGTH=329	8e-44
assembly1382_967bp	AT2G28700.1	Symbols: AGL46 | AGAMOUS-like 46 | chr2:12317384-12318724 REVERSE LENGTH=329	2e-46
assembly1383_875bp	AT3G29670.1	Symbols: | HXXXD-type acyl-transferase family protein | chr3:11527952-11529307 FORWARD LENGTH=451	2e-77
assembly1384_355bp	AT3G63250.1	Symbols: HMT-2, ATHMT-2, HMT2 | homocysteine methyltransferase 2 | chr3:23370575-23372587 REVERSE LENGTH=333	5e-21
assembly1385_572bp	AT3G06760.2	Symbols: | Drought-responsive family protein | chr3:2132971-2134355 FORWARD LENGTH=234	6e-13
assembly1386_619bp	AT5G06120.1	Symbols: | ARM repeat superfamily protein | chr5:1844797-1852601 FORWARD LENGTH=1066	3e-08
assembly1387_402bp	AT1G77440.1	Symbols: PBC2 | 20S proteasome beta subunit C2 | chr1:29096334-29098105 FORWARD LENGTH=204	3e-11
assembly1388_435bp	AT3G21690.1	Symbols: | MATE efflux family protein | chr3:7638750-7641861 FORWARD LENGTH=506	8e-21
assembly1389_357bp	AT2G37700.1	Symbols: | Fatty acid hydroxylase superfamily | chr2:15810581-15814176 REVERSE LENGTH=613	4e-19
assembly1390_393bp	NoHits
assembly1391_364bp	AT3G18130.1	Symbols: RACK1C_AT | receptor for activated C kinase 1C | chr3:6211109-6212371 REVERSE LENGTH=326	3e-12
assembly1392_1077bp	AT5G61820.1	Symbols: | FUNCTIONS IN: molecular_function unknown; INVOLVED IN: biological_process unknown; LOCATED IN: vacuole; EXPRESSED IN: 24 plant structures; EXPRESSED DURING: 15 growth stages; CONTAINS InterPro DOMAIN/s: Stress up-regulated Nod 19 (InterPro:IPR011692); Has 30201 Blast hits to 17322 proteins in 780 species: Archae - 12; Bacteria - 1396; Metazoa - 17338; Fungi - 3422; Plants - 5037; Virus…	e-141
assembly1393_324bp	AT1G71260.1	Symbols: ATWHY2, WHY2 | WHIRLY 2 | chr1:26861849-26863391 REVERSE LENGTH=238	4e-06
assembly1394_3082bp	AT3G30730.1	Symbols: | unknown protein; Has 59 Blast hits to 59 proteins in 7 species: Archae - 0; Bacteria - 0; Metazoa - 0; Fungi - 0; Plants - 59; Viruses - 0; Other Eukaryotes - 0 (source: NCBI BLink). | chr3:12357396-12357599 REVERSE LENGTH=67	7e-10
assembly1395_934bp	AT1G07630.1	Symbols: PLL5 | pol-like 5 | chr1:2349189-2351437 FORWARD LENGTH=662	0
assembly1396_936bp	AT1G07630.1	Symbols: PLL5 | pol-like 5 | chr1:2349189-2351437 FORWARD LENGTH=662	0
assembly1397_1044bp	AT5G18210.1	Symbols: | NAD(P)-binding Rossmann-fold superfamily protein | chr5:6017865-6018919 FORWARD LENGTH=277	e-126
assembly1398_975bp	AT5G18210.1	Symbols: | NAD(P)-binding Rossmann-fold superfamily protein | chr5:6017865-6018919 FORWARD LENGTH=277	e-132
assembly1399_2342bp	AT5G62630.1	Symbols: HIPL2 | hipl2 protein precursor | chr5:25143719-25146390 REVERSE LENGTH=696	0
assembly1400_2423bp	AT5G62630.1	Symbols: HIPL2 | hipl2 protein precursor | chr5:25143719-25146390 REVERSE LENGTH=696	0
assembly1401_445bp	AT1G06560.1	Symbols: | NOL1/NOP2/sun family protein | chr1:2007660-2011824 FORWARD LENGTH=599	4e-08
assembly1402_602bp	AT1G71710.1	Symbols: | DNAse I-like superfamily protein | chr1:26973796-26976774 REVERSE LENGTH=664	3e-46
assembly1403_453bp	AT1G50500.2	Symbols: HIT1 | Membrane trafficking VPS53 family protein | chr1:18708217-18715597 REVERSE LENGTH=847	3e-09
assembly1404_398bp	AT5G11250.1	Symbols: | Disease resistance protein (TIR-NBS-LRR class) | chr5:3587978-3591960 REVERSE LENGTH=1189	2e-28
assembly1405_460bp	NoHits
assembly1406_402bp	NoHits
assembly1407_357bp	AT3G57870.1	Symbols: AHUS5, EMB1637, SCE1, SCE1A, ATSCE1 | sumo conjugation enzyme 1 | chr3:21428831-21430110 REVERSE LENGTH=160	7e-16
assembly1408_535bp	AT3G57870.1	Symbols: AHUS5, EMB1637, SCE1, SCE1A, ATSCE1 | sumo conjugation enzyme 1 | chr3:21428831-21430110 REVERSE LENGTH=160	2e-12
assembly1409_467bp	AT5G19660.1	Symbols: ATSBT6.1, S1P, ATS1P | SITE-1 protease | chr5:6642118-6646418 REVERSE LENGTH=1038	3e-21
assembly1410_593bp	AT5G19660.1	Symbols: ATSBT6.1, S1P, ATS1P | SITE-1 protease | chr5:6642118-6646418 REVERSE LENGTH=1038	1e-19
assembly1411_1257bp	AT5G37150.1	Symbols: | P-loop containing nucleoside triphosphate hydrolases superfamily protein | chr5:14701330-14704562 FORWARD LENGTH=839	3e-70
assembly1412_627bp	AT3G17860.1	Symbols: JAZ3, JAI3, TIFY6B | jasmonate-zim-domain protein 3 | chr3:6119968-6122691 FORWARD LENGTH=352	1e-20
assembly1413_407bp	AT1G11180.2	Symbols: | Secretory carrier membrane protein (SCAMP) family protein | chr1:3745829-3748307 FORWARD LENGTH=304	1e-13
assembly1414_319bp	AT3G48750.1	Symbols: CDKA;1, CDC2AAT, CDK2, CDC2, CDC2A, CDKA1 | cell division control 2 | chr3:18072238-18074296 FORWARD LENGTH=294	3e-10
assembly1415_385bp	AT2G46620.1	Symbols: | P-loop containing nucleoside triphosphate hydrolases superfamily protein | chr2:19139071-19140546 REVERSE LENGTH=491	1e-69
assembly1416_343bp	AT2G46620.1	Symbols: | P-loop containing nucleoside triphosphate hydrolases superfamily protein | chr2:19139071-19140546 REVERSE LENGTH=491	3e-55
assembly1417_964bp	AT1G54540.1	Symbols: | Late embryogenesis abundant (LEA) hydroxyproline-rich glycoprotein family | chr1:20367702-20368421 REVERSE LENGTH=239	e-104
assembly1418_655bp	AT3G14200.1	Symbols: | Chaperone DnaJ-domain superfamily protein | chr3:4712881-4714361 REVERSE LENGTH=230	1e-12
assembly1419_615bp	NoHits
assembly1420_906bp	AT1G60500.1	Symbols: DRP4C | Dynamin related protein 4C | chr1:22291582-22293822 FORWARD LENGTH=669	e-126
assembly1421_695bp	AT1G76980.1	Symbols: | BEST Arabidopsis thaliana protein match is: embryo defective 2170 (TAIR:AT1G21390.1); Has 65 Blast hits to 65 proteins in 23 species: Archae - 0; Bacteria - 8; Metazoa - 1; Fungi - 8; Plants - 40; Viruses - 3; Other Eukaryotes - 5 (source: NCBI BLink). | chr1:28926466-28927242 REVERSE LENGTH=258	2e-90
assembly1422_866bp	AT3G06530.2	Symbols: | ARM repeat superfamily protein | chr3:2022596-2033637 FORWARD LENGTH=2199	e-106
assembly1423_339bp	NoHits
assembly1424_335bp	NoHits
assembly1425_377bp	AT1G02000.1	Symbols: GAE2 | UDP-D-glucuronate 4-epimerase 2 | chr1:346052-347356 FORWARD LENGTH=434	5e-43
assembly1426_336bp	NoHits
assembly1427_735bp	AT5G44420.1	Symbols: PDF1.2, PDF1.2A, LCR77 | plant defensin 1.2 | chr5:17907216-17907550 REVERSE LENGTH=80	2e-48
assembly1428_508bp	AT3G57030.1	Symbols: | Calcium-dependent phosphotriesterase superfamily protein | chr3:21101653-21103204 REVERSE LENGTH=374	2e-10
assembly1429_311bp	NoHits
assembly1430_429bp	NoHits
assembly1431_445bp	AT1G30360.1	Symbols: ERD4 | Early-responsive to dehydration stress protein (ERD4) | chr1:10715892-10718799 FORWARD LENGTH=724	3e-74
assembly1432_626bp	AT1G18300.1	Symbols: atnudt4, NUDT4 | nudix hydrolase homolog 4 | chr1:6299841-6300799 FORWARD LENGTH=207	4e-77
assembly1433_501bp	AT5G17760.1	Symbols: | P-loop containing nucleoside triphosphate hydrolases superfamily protein | chr5:5860591-5862301 REVERSE LENGTH=505	1e-60
assembly1434_303bp	AT1G52700.1	Symbols: | alpha/beta-Hydrolases superfamily protein | chr1:19631186-19633366 REVERSE LENGTH=255	6e-10
assembly1435_479bp	AT2G46600.1	Symbols: | Calcium-binding EF-hand family protein | chr2:19136070-19136477 FORWARD LENGTH=135	2e-35
assembly1436_597bp	AT5G58950.1	Symbols: | Protein kinase superfamily protein | chr5:23801136-23803025 REVERSE LENGTH=525	6e-11
assembly1437_502bp	AT5G58950.1	Symbols: | Protein kinase superfamily protein | chr5:23801136-23803025 REVERSE LENGTH=525	3e-11
assembly1438_342bp	AT5G48470.1	Symbols: | unknown protein; FUNCTIONS IN: molecular_function unknown; INVOLVED IN: biological_process unknown; LOCATED IN: chloroplast; EXPRESSED IN: 22 plant structures; EXPRESSED DURING: 13 growth stages; Has 30201 Blast hits to 17322 proteins in 780 species: Archae - 12; Bacteria - 1396; Metazoa - 17338; Fungi - 3422; Plants - 5037; Viruses - 0; Other Eukaryotes - 2996 (source: NCBI BLink). | …	6e-20
assembly1439_416bp	AT5G48470.1	Symbols: | unknown protein; FUNCTIONS IN: molecular_function unknown; INVOLVED IN: biological_process unknown; LOCATED IN: chloroplast; EXPRESSED IN: 22 plant structures; EXPRESSED DURING: 13 growth stages; Has 30201 Blast hits to 17322 proteins in 780 species: Archae - 12; Bacteria - 1396; Metazoa - 17338; Fungi - 3422; Plants - 5037; Viruses - 0; Other Eukaryotes - 2996 (source: NCBI BLink). | …	2e-22
assembly1440_337bp	AT5G48470.1	Symbols: | unknown protein; FUNCTIONS IN: molecular_function unknown; INVOLVED IN: biological_process unknown; LOCATED IN: chloroplast; EXPRESSED IN: 22 plant structures; EXPRESSED DURING: 13 growth stages; Has 30201 Blast hits to 17322 proteins in 780 species: Archae - 12; Bacteria - 1396; Metazoa - 17338; Fungi - 3422; Plants - 5037; Viruses - 0; Other Eukaryotes - 2996 (source: NCBI BLink). | …	7e-23
assembly1441_421bp	AT5G48470.1	Symbols: | unknown protein; FUNCTIONS IN: molecular_function unknown; INVOLVED IN: biological_process unknown; LOCATED IN: chloroplast; EXPRESSED IN: 22 plant structures; EXPRESSED DURING: 13 growth stages; Has 30201 Blast hits to 17322 proteins in 780 species: Archae - 12; Bacteria - 1396; Metazoa - 17338; Fungi - 3422; Plants - 5037; Viruses - 0; Other Eukaryotes - 2996 (source: NCBI BLink). | …	1e-21
assembly1442_2702bp	AT1G76320.1	Symbols: FRS4 | FAR1-related sequence 4 | chr1:28631404-28633886 FORWARD LENGTH=732	0
assembly1443_1810bp	AT4G08390.1	Symbols: SAPX | stromal ascorbate peroxidase | chr4:5314999-5317071 FORWARD LENGTH=372	0
assembly1444_2723bp	AT5G19540.1	Symbols: | unknown protein; FUNCTIONS IN: molecular_function unknown; INVOLVED IN: biological_process unknown; LOCATED IN: chloroplast; EXPRESSED IN: 22 plant structures; EXPRESSED DURING: 13 growth stages; Has 1807 Blast hits to 1807 proteins in 277 species: Archae - 0; Bacteria - 0; Metazoa - 736; Fungi - 347; Plants - 385; Viruses - 0; Other Eukaryotes - 339 (source: NCBI BLink). | chr5:659574…	5e-09
assembly1445_306bp	AT1G74190.1	Symbols: AtRLP15, RLP15 | receptor like protein 15 | chr1:27902590-27906158 REVERSE LENGTH=965	6e-21
assembly1446_334bp	NoHits
assembly1447_336bp	NoHits
assembly1448_597bp	AT2G31510.1	Symbols: ARI7, ATARI7 | IBR domain-containing protein | chr2:13416991-13421170 REVERSE LENGTH=562	4e-10
assembly1449_473bp	AT5G18780.1	Symbols: | F-box/RNI-like superfamily protein | chr5:6264610-6266097 FORWARD LENGTH=441	1e-25
assembly1450_581bp	AT5G18780.1	Symbols: | F-box/RNI-like superfamily protein | chr5:6264610-6266097 FORWARD LENGTH=441	5e-25
assembly1451_380bp	AT2G12480.2	Symbols: SCPL43 | serine carboxypeptidase-like 43 | chr2:5069795-5072227 REVERSE LENGTH=443	2e-33
assembly1452_361bp	AT2G40290.1	Symbols: | Eukaryotic translation initiation factor 2 subunit 1 | chr2:16829030-16830889 REVERSE LENGTH=344	7e-07
assembly1453_319bp	NoHits
assembly1454_3655bp	AT1G06710.1	Symbols: | Tetratricopeptide repeat (TPR)-like superfamily protein | chr1:2056999-2060242 REVERSE LENGTH=997	0
assembly1455_816bp	AT5G08560.1	Symbols: | transducin family protein / WD-40 repeat family protein | chr5:2771104-2773827 REVERSE LENGTH=589	3e-07
assembly1456_624bp	AT1G72130.1	Symbols: | Major facilitator superfamily protein | chr1:27137201-27139223 FORWARD LENGTH=538	3e-97
assembly1457_1349bp	AT5G26880.1	Symbols: AGL26 | AGAMOUS-like 26 | chr5:9457301-9459190 REVERSE LENGTH=368	e-118
assembly1458_1499bp	AT5G26880.1	Symbols: AGL26 | AGAMOUS-like 26 | chr5:9457301-9459190 REVERSE LENGTH=368	e-107
assembly1459_348bp	AT5G01450.1	Symbols: | RING/U-box superfamily protein | chr5:183693-186244 REVERSE LENGTH=444	5e-10
assembly1460_343bp	NoHits
assembly1461_313bp	AT5G43680.1	Symbols: | unknown protein; Has 30201 Blast hits to 17322 proteins in 780 species: Archae - 12; Bacteria - 1396; Metazoa - 17338; Fungi - 3422; Plants - 5037; Viruses - 0; Other Eukaryotes - 2996 (source: NCBI BLink). | chr5:17544074-17545354 FORWARD LENGTH=232	2e-06
assembly1462_423bp	AT1G77800.1	Symbols: | PHD finger family protein | chr1:29253800-29260190 FORWARD LENGTH=1375	4e-50
assembly1463_573bp	NoHits
assembly1464_840bp	NoHits
assembly1465_440bp	AT1G69790.1	Symbols: | Protein kinase superfamily protein | chr1:26266838-26268818 FORWARD LENGTH=387	1e-15
assembly1466_1018bp	NoHits
assembly1467_990bp	NoHits
assembly1468_1984bp	AT2G20250.1	Symbols: | unknown protein; Has 10 Blast hits to 10 proteins in 6 species: Archae - 0; Bacteria - 0; Metazoa - 0; Fungi - 2; Plants - 8; Viruses - 0; Other Eukaryotes - 0 (source: NCBI BLink). | chr2:8734049-8736416 REVERSE LENGTH=574	0
assembly1469_2215bp	AT2G20250.1	Symbols: | unknown protein; Has 10 Blast hits to 10 proteins in 6 species: Archae - 0; Bacteria - 0; Metazoa - 0; Fungi - 2; Plants - 8; Viruses - 0; Other Eukaryotes - 0 (source: NCBI BLink). | chr2:8734049-8736416 REVERSE LENGTH=574	e-175
assembly1470_2293bp	AT2G20250.1	Symbols: | unknown protein; Has 10 Blast hits to 10 proteins in 6 species: Archae - 0; Bacteria - 0; Metazoa - 0; Fungi - 2; Plants - 8; Viruses - 0; Other Eukaryotes - 0 (source: NCBI BLink). | chr2:8734049-8736416 REVERSE LENGTH=574	e-170
assembly1471_2062bp	AT2G20250.1	Symbols: | unknown protein; Has 10 Blast hits to 10 proteins in 6 species: Archae - 0; Bacteria - 0; Metazoa - 0; Fungi - 2; Plants - 8; Viruses - 0; Other Eukaryotes - 0 (source: NCBI BLink). | chr2:8734049-8736416 REVERSE LENGTH=574	0
assembly1472_573bp	AT2G42120.1	Symbols: POLD2 | DNA polymerase delta small subunit | chr2:17563282-17565965 REVERSE LENGTH=441	1e-17
assembly1473_664bp	AT2G42120.1	Symbols: POLD2 | DNA polymerase delta small subunit | chr2:17563282-17565965 REVERSE LENGTH=441	1e-08
assembly1474_430bp	AT2G42120.1	Symbols: POLD2 | DNA polymerase delta small subunit | chr2:17563282-17565965 REVERSE LENGTH=441	4e-07
assembly1475_683bp	AT3G11500.1	Symbols: | Small nuclear ribonucleoprotein family protein | chr3:3621626-3622474 REVERSE LENGTH=79	4e-50
assembly1476_445bp	AT1G67370.1	Symbols: ASY1, ATASY1 | DNA-binding HORMA family protein | chr1:25239347-25243713 REVERSE LENGTH=596	9e-78
assembly1477_727bp	AT5G55670.1	Symbols: | RNA-binding (RRM/RBD/RNP motifs) family protein | chr5:22544669-22546801 REVERSE LENGTH=710	5e-62
assembly1478_1116bp	AT5G55670.1	Symbols: | RNA-binding (RRM/RBD/RNP motifs) family protein | chr5:22544669-22546801 REVERSE LENGTH=710	2e-93
assembly1479_1249bp	AT4G20380.8	Symbols: LSD1 | LSD1 zinc finger family protein | chr4:11005027-11006438 FORWARD LENGTH=210	5e-70
assembly1480_817bp	NoHits
assembly1481_658bp	AT5G09810.1	Symbols: ACT7 | actin 7 | chr5:3052809-3054220 FORWARD LENGTH=377	2e-09
assembly1482_1072bp	AT2G25150.1	Symbols: | HXXXD-type acyl-transferase family protein | chr2:10702582-10704266 REVERSE LENGTH=461	0
assembly1483_643bp	AT2G16530.1	Symbols: | 3-oxo-5-alpha-steroid 4-dehydrogenase family protein | chr2:7163276-7165064 REVERSE LENGTH=343	2e-49
assembly1484_669bp	AT2G16530.1	Symbols: | 3-oxo-5-alpha-steroid 4-dehydrogenase family protein | chr2:7163276-7165064 REVERSE LENGTH=343	4e-72
assembly1485_977bp	AT5G57030.1	Symbols: LUT2 | Lycopene beta/epsilon cyclase protein | chr5:23077398-23079818 FORWARD LENGTH=524	6e-17
assembly1486_882bp	AT5G57030.1	Symbols: LUT2 | Lycopene beta/epsilon cyclase protein | chr5:23077398-23079818 FORWARD LENGTH=524	1e-16
assembly1487_844bp	AT5G57030.1	Symbols: LUT2 | Lycopene beta/epsilon cyclase protein | chr5:23077398-23079818 FORWARD LENGTH=524	5e-17
assembly1488_924bp	AT4G04330.1	Symbols: | Chaperonin-like RbcX protein | chr4:2116700-2118563 REVERSE LENGTH=174	5e-79
assembly1489_1164bp	AT4G04330.1	Symbols: | Chaperonin-like RbcX protein | chr4:2116700-2118563 REVERSE LENGTH=174	1e-42
assembly1490_1104bp	AT4G04330.1	Symbols: | Chaperonin-like RbcX protein | chr4:2116700-2118563 REVERSE LENGTH=174	2e-42
assembly1491_984bp	AT4G04330.1	Symbols: | Chaperonin-like RbcX protein | chr4:2116700-2118563 REVERSE LENGTH=174	5e-72
assembly1492_1354bp	AT1G14800.1	Symbols: | Nucleic acid-binding, OB-fold-like protein | chr1:5099572-5102558 FORWARD LENGTH=384	2e-11
assembly1493_908bp	AT1G14800.1	Symbols: | Nucleic acid-binding, OB-fold-like protein | chr1:5099572-5102558 FORWARD LENGTH=384	1e-10
assembly1494_863bp	AT3G58170.1	Symbols: ATBS14A, ATBET11, BET11, BS14A | BET1P/SFT1P-like protein 14A | chr3:21542632-21543775 REVERSE LENGTH=122	2e-58
assembly1495_786bp	AT3G58170.1	Symbols: ATBS14A, ATBET11, BET11, BS14A | BET1P/SFT1P-like protein 14A | chr3:21542632-21543775 REVERSE LENGTH=122	3e-81
assembly1496_895bp	AT3G58170.1	Symbols: ATBS14A, ATBET11, BET11, BS14A | BET1P/SFT1P-like protein 14A | chr3:21542632-21543775 REVERSE LENGTH=122	4e-55
assembly1497_814bp	AT3G58170.1	Symbols: ATBS14A, ATBET11, BET11, BS14A | BET1P/SFT1P-like protein 14A | chr3:21542632-21543775 REVERSE LENGTH=122	3e-55
assembly1498_998bp	AT1G75980.1	Symbols: | Single hybrid motif superfamily protein | chr1:28522936-28524302 REVERSE LENGTH=225	e-112
assembly1499_692bp	AT5G35525.1	Symbols: | PLAC8 family protein | chr5:13707084-13707818 FORWARD LENGTH=152	2e-14
assembly1500_1132bp	AT5G66580.1	Symbols: | unknown protein; FUNCTIONS IN: molecular_function unknown; INVOLVED IN: N-terminal protein myristoylation; LOCATED IN: cellular_component unknown; BEST Arabidopsis thaliana protein match is: unknown protein (TAIR:AT3G50800.1); Has 1807 Blast hits to 1807 proteins in 277 species: Archae - 0; Bacteria - 0; Metazoa - 736; Fungi - 347; Plants - 385; Viruses - 0; Other Eukaryotes - 339 (sou…	1e-59
assembly1501_1219bp	AT5G66580.1	Symbols: | unknown protein; FUNCTIONS IN: molecular_function unknown; INVOLVED IN: N-terminal protein myristoylation; LOCATED IN: cellular_component unknown; BEST Arabidopsis thaliana protein match is: unknown protein (TAIR:AT3G50800.1); Has 1807 Blast hits to 1807 proteins in 277 species: Archae - 0; Bacteria - 0; Metazoa - 736; Fungi - 347; Plants - 385; Viruses - 0; Other Eukaryotes - 339 (sou…	7e-67
assembly1502_1637bp	AT5G52100.1	Symbols: crr1 | Dihydrodipicolinate reductase, bacterial/plant | chr5:21170203-21172107 FORWARD LENGTH=298	e-147
assembly1503_1729bp	AT5G52100.1	Symbols: crr1 | Dihydrodipicolinate reductase, bacterial/plant | chr5:21170203-21172107 FORWARD LENGTH=298	e-142
assembly1504_614bp	NoHits
assembly1505_391bp	AT1G10670.3	Symbols: ACLA-1 | ATP-citrate lyase A-1 | chr1:3535787-3538098 FORWARD LENGTH=443	2e-10
assembly1506_3021bp	AT1G58400.1	Symbols: | Disease resistance protein (CC-NBS-LRR class) family | chr1:21696165-21699118 REVERSE LENGTH=900	0
assembly1507_602bp	NoHits
assembly1508_367bp	AT5G49280.1	Symbols: | hydroxyproline-rich glycoprotein family protein | chr5:19976842-19977330 REVERSE LENGTH=162	1e-12
assembly1509_347bp	NoHits
assembly1510_312bp	NoHits
assembly1511_3156bp	AT1G63350.1	Symbols: | Disease resistance protein (CC-NBS-LRR class) family | chr1:23494935-23497631 REVERSE LENGTH=898	0
assembly1512_3092bp	AT1G71490.1	Symbols: | Tetratricopeptide repeat (TPR)-like superfamily protein | chr1:26933326-26935371 REVERSE LENGTH=681	0
assembly1513_329bp	AT1G65420.1	Symbols: NPQ7 | Protein of unknown function (DUF565) | chr1:24297669-24298374 REVERSE LENGTH=197	3e-13
assembly1514_493bp	AT1G65420.1	Symbols: NPQ7 | Protein of unknown function (DUF565) | chr1:24297669-24298374 REVERSE LENGTH=197	2e-14
assembly1515_448bp	AT2G15430.1	Symbols: RBP36A, RPB35.5A, NRPB3, NRPD3, NRPE3A | DNA-directed RNA polymerase family protein | chr2:6733661-6735482 FORWARD LENGTH=319	7e-07
assembly1516_396bp	AT2G15430.1	Symbols: RBP36A, RPB35.5A, NRPB3, NRPD3, NRPE3A | DNA-directed RNA polymerase family protein | chr2:6733661-6735482 FORWARD LENGTH=319	5e-07
assembly1517_420bp	AT1G56140.1	Symbols: | Leucine-rich repeat transmembrane protein kinase | chr1:21001708-21007725 REVERSE LENGTH=1033	3e-52
assembly1518_476bp	AT1G56140.1	Symbols: | Leucine-rich repeat transmembrane protein kinase | chr1:21001708-21007725 REVERSE LENGTH=1033	1e-76
assembly1519_449bp	AT1G56140.1	Symbols: | Leucine-rich repeat transmembrane protein kinase | chr1:21001708-21007725 REVERSE LENGTH=1033	6e-67
assembly1520_533bp	AT1G56120.1	Symbols: | Leucine-rich repeat transmembrane protein kinase | chr1:20987288-20993072 REVERSE LENGTH=1047	2e-75
assembly1521_376bp	NoHits
assembly1522_760bp	AT2G33120.2	Symbols: SAR1, VAMP722, ATVAMP722 | synaptobrevin-related protein 1 | chr2:14043785-14045337 REVERSE LENGTH=229	2e-47
assembly1523_1671bp	AT1G76130.1	Symbols: ATAMY2, AMY2 | alpha-amylase-like 2 | chr1:28561647-28563914 FORWARD LENGTH=413	0
assembly1524_1590bp	AT1G76130.1	Symbols: ATAMY2, AMY2 | alpha-amylase-like 2 | chr1:28561647-28563914 FORWARD LENGTH=413	0
assembly1525_756bp	AT5G12990.1	Symbols: CLE40 | CLAVATA3/ESR-RELATED 40 | chr5:4109234-4109768 REVERSE LENGTH=80	2e-09
assembly1526_571bp	AT5G12990.1	Symbols: CLE40 | CLAVATA3/ESR-RELATED 40 | chr5:4109234-4109768 REVERSE LENGTH=80	1e-33
assembly1527_547bp	AT5G12990.1	Symbols: CLE40 | CLAVATA3/ESR-RELATED 40 | chr5:4109234-4109768 REVERSE LENGTH=80	3e-33
assembly1528_692bp	AT1G21280.1	Symbols: | CONTAINS InterPro DOMAIN/s: Retrotransposon gag protein (InterPro:IPR005162); Has 707 Blast hits to 705 proteins in 25 species: Archae - 0; Bacteria - 0; Metazoa - 4; Fungi - 0; Plants - 703; Viruses - 0; Other Eukaryotes - 0 (source: NCBI BLink). | chr1:7447690-7448403 REVERSE LENGTH=237	7e-28
assembly1529_1020bp	NoHits
assembly1530_509bp	NoHits
assembly1531_711bp	AT4G31380.1	Symbols: FLP1 | FPF1-like protein 1 | chr4:15229837-15230382 FORWARD LENGTH=181	1e-65
assembly1532_671bp	AT4G31380.1	Symbols: FLP1 | FPF1-like protein 1 | chr4:15229837-15230382 FORWARD LENGTH=181	3e-66
assembly1533_839bp	AT2G01240.1	Symbols: | Reticulon family protein | chr2:128440-129256 REVERSE LENGTH=160	3e-32
assembly1534_765bp	AT2G01240.1	Symbols: | Reticulon family protein | chr2:128440-129256 REVERSE LENGTH=160	1e-09
assembly1535_1051bp	AT2G01240.1	Symbols: | Reticulon family protein | chr2:128440-129256 REVERSE LENGTH=160	2e-13
assembly1536_811bp	AT1G10000.1	Symbols: | Ribonuclease H-like superfamily protein | chr1:3263877-3264788 REVERSE LENGTH=303	2e-33
assembly1537_722bp	AT2G06845.1	Symbols: | Beta-galactosidase related protein | chr2:2754666-2756008 FORWARD LENGTH=315	4e-20
assembly1538_970bp	AT1G08500.1	Symbols: ENODL18, AtENODL18 | early nodulin-like protein 18 | chr1:2689110-2689881 FORWARD LENGTH=228	e-107
assembly1539_3879bp	AT4G38050.1	Symbols: | Xanthine/uracil permease family protein | chr4:17869529-17872461 REVERSE LENGTH=709	0
assembly1540_406bp	AT4G38040.1	Symbols: | Exostosin family protein | chr4:17867501-17869131 FORWARD LENGTH=425	3e-42
assembly1541_465bp	NoHits
assembly1542_853bp	NoHits
assembly1543_567bp	NoHits
assembly1544_709bp	AT3G21690.1	Symbols: | MATE efflux family protein | chr3:7638750-7641861 FORWARD LENGTH=506	6e-10
assembly1545_1186bp	AT1G15420.1	Symbols: | CONTAINS InterPro DOMAIN/s: Small-subunit processome, Utp12 (InterPro:IPR007148); Has 764 Blast hits to 656 proteins in 193 species: Archae - 0; Bacteria - 42; Metazoa - 237; Fungi - 154; Plants - 85; Viruses - 23; Other Eukaryotes - 223 (source: NCBI BLink). | chr1:5301794-5303296 REVERSE LENGTH=278	e-106
assembly1546_323bp	NoHits
assembly1547_1907bp	AT1G11910.1	Symbols: APA1, ATAPA1 | aspartic proteinase A1 | chr1:4017119-4019874 REVERSE LENGTH=506	0
assembly1548_2061bp	AT1G11910.1	Symbols: APA1, ATAPA1 | aspartic proteinase A1 | chr1:4017119-4019874 REVERSE LENGTH=506	e-125
assembly1549_1984bp	AT1G11910.1	Symbols: APA1, ATAPA1 | aspartic proteinase A1 | chr1:4017119-4019874 REVERSE LENGTH=506	e-155
assembly1550_951bp	AT5G46160.1	Symbols: | Ribosomal protein L14p/L23e family protein | chr5:18711456-18712341 REVERSE LENGTH=173	5e-68
assembly1551_1234bp	AT4G29160.1	Symbols: SNF7.1 | SNF7 family protein | chr4:14381019-14382342 FORWARD LENGTH=219	5e-80
assembly1552_399bp	AT2G19830.1	Symbols: SNF7.2, VPS32 | SNF7 family protein | chr2:8558101-8559389 REVERSE LENGTH=213	5e-35
assembly1553_643bp	AT4G29160.1	Symbols: SNF7.1 | SNF7 family protein | chr4:14381019-14382342 FORWARD LENGTH=219	3e-55
assembly1554_3141bp	AT2G41790.1	Symbols: | Insulinase (Peptidase family M16) family protein | chr2:17429453-17436110 REVERSE LENGTH=970	0
assembly1555_1114bp	AT5G53420.1	Symbols: | CCT motif family protein | chr5:21673683-21675469 FORWARD LENGTH=264	2e-11
assembly1556_989bp	AT5G53420.1	Symbols: | CCT motif family protein | chr5:21673683-21675469 FORWARD LENGTH=264	1e-11
assembly1557_1204bp	AT5G53420.1	Symbols: | CCT motif family protein | chr5:21673683-21675469 FORWARD LENGTH=264	2e-11
assembly1558_962bp	NoHits
assembly1559_305bp	AT1G14320.1	Symbols: SAC52, RPL10, RPL10A | Ribosomal protein L16p/L10e family protein | chr1:4888270-4889408 FORWARD LENGTH=220	3e-14
assembly1560_567bp	AT2G41790.1	Symbols: | Insulinase (Peptidase family M16) family protein | chr2:17429453-17436110 REVERSE LENGTH=970	4e-47
assembly1561_410bp	AT2G41790.1	Symbols: | Insulinase (Peptidase family M16) family protein | chr2:17429453-17436110 REVERSE LENGTH=970	4e-52
assembly1562_388bp	NoHits
assembly1563_1729bp	AT3G01550.1	Symbols: ATPPT2, PPT2 | phosphoenolpyruvate (pep)/phosphate translocator 2 | chr3:216947-218856 REVERSE LENGTH=383	e-174
assembly1564_1714bp	AT3G01550.1	Symbols: ATPPT2, PPT2 | phosphoenolpyruvate (pep)/phosphate translocator 2 | chr3:216947-218856 REVERSE LENGTH=383	e-119
assembly1565_1638bp	AT3G01550.1	Symbols: ATPPT2, PPT2 | phosphoenolpyruvate (pep)/phosphate translocator 2 | chr3:216947-218856 REVERSE LENGTH=383	0
assembly1566_1805bp	AT5G33320.1	Symbols: CUE1, PPT, ARAPPT | Glucose-6-phosphate/phosphate translocator-related | chr5:12588950-12591408 FORWARD LENGTH=408	9e-91
assembly1567_435bp	AT3G48420.1	Symbols: | Haloacid dehalogenase-like hydrolase (HAD) superfamily protein | chr3:17929743-17931551 FORWARD LENGTH=319	3e-24
assembly1568_502bp	NoHits
assembly1569_1550bp	AT3G28960.1	Symbols: | Transmembrane amino acid transporter family protein | chr3:10984245-10985767 REVERSE LENGTH=405	0
assembly1570_1078bp	AT4G14455.1	Symbols: ATBET12, BET12, ATBS14B, BS14B | Target SNARE coiled-coil domain protein | chr4:8310482-8311938 FORWARD LENGTH=130	4e-15
assembly1571_975bp	AT4G14455.1	Symbols: ATBET12, BET12, ATBS14B, BS14B | Target SNARE coiled-coil domain protein | chr4:8310482-8311938 FORWARD LENGTH=130	3e-15
assembly1572_943bp	AT4G14455.1	Symbols: ATBET12, BET12, ATBS14B, BS14B | Target SNARE coiled-coil domain protein | chr4:8310482-8311938 FORWARD LENGTH=130	2e-14
assembly1573_764bp	NoHits
assembly1574_1123bp	AT4G14455.1	Symbols: ATBET12, BET12, ATBS14B, BS14B | Target SNARE coiled-coil domain protein | chr4:8310482-8311938 FORWARD LENGTH=130	3e-14
assembly1575_3328bp	AT5G27270.1	Symbols: EMB976 | Tetratricopeptide repeat (TPR)-like superfamily protein | chr5:9605650-9609625 FORWARD LENGTH=1038	0
assembly1576_831bp	AT1G27400.1	Symbols: | Ribosomal protein L22p/L17e family protein | chr1:9515230-9516725 FORWARD LENGTH=176	8e-35
assembly1577_346bp	NoHits
assembly1578_3280bp	AT3G58650.1	Symbols: | unknown protein; FUNCTIONS IN: molecular_function unknown; INVOLVED IN: biological_process unknown; LOCATED IN: plasma membrane; EXPRESSED IN: 14 plant structures; EXPRESSED DURING: 8 growth stages; BEST Arabidopsis thaliana protein match is: unknown protein (TAIR:AT5G26910.1); Has 2350 Blast hits to 1412 proteins in 248 species: Archae - 0; Bacteria - 487; Metazoa - 577; Fungi - 236; …	0
assembly1579_1777bp	NoHits
assembly1580_4308bp	AT4G27190.1	Symbols: | NB-ARC domain-containing disease resistance protein | chr4:13620977-13623934 REVERSE LENGTH=985	0
assembly1581_657bp	NoHits
assembly1582_1248bp	AT2G34510.1	Symbols: | Protein of unknown function, DUF642 | chr2:14544114-14546732 REVERSE LENGTH=401	0
assembly1583_538bp	NoHits
assembly1584_544bp	AT3G07630.1	Symbols: ADT2 | arogenate dehydratase 2 | chr3:2435457-2437530 FORWARD LENGTH=381	1e-56
assembly1585_1572bp	AT3G07630.1	Symbols: ADT2 | arogenate dehydratase 2 | chr3:2435457-2437530 FORWARD LENGTH=381	0
assembly1586_2095bp	AT3G07630.1	Symbols: ADT2 | arogenate dehydratase 2 | chr3:2435457-2437530 FORWARD LENGTH=381	e-175
assembly1587_618bp	AT3G07630.1	Symbols: ADT2 | arogenate dehydratase 2 | chr3:2435457-2437530 FORWARD LENGTH=381	1e-42
assembly1588_435bp	AT2G30990.1	Symbols: | Protein of unknown function (DUF688) | chr2:13187776-13189761 REVERSE LENGTH=593	8e-45
assembly1589_1698bp	AT2G30990.1	Symbols: | Protein of unknown function (DUF688) | chr2:13187776-13189761 REVERSE LENGTH=593	0
assembly1590_1857bp	AT2G30990.1	Symbols: | Protein of unknown function (DUF688) | chr2:13187776-13189761 REVERSE LENGTH=593	0
assembly1591_1383bp	AT2G02070.1	Symbols: AtIDD5, IDD5 | indeterminate(ID)-domain 5 | chr2:505523-509154 FORWARD LENGTH=602	1e-08
assembly1592_1022bp	NoHits
assembly1593_952bp	AT1G68960.1	Symbols: | Protein of unknown function (DUF295) | chr1:25929943-25931143 FORWARD LENGTH=376	e-106
assembly1594_787bp	NoHits
assembly1595_1699bp	AT1G18335.1	Symbols: | Acyl-CoA N-acyltransferases (NAT) superfamily protein | chr1:6309428-6311326 REVERSE LENGTH=269	4e-82
assembly1596_1587bp	AT1G18335.1	Symbols: | Acyl-CoA N-acyltransferases (NAT) superfamily protein | chr1:6309428-6311326 REVERSE LENGTH=269	e-112
assembly1597_354bp	NoHits
assembly1598_2318bp	AT1G73730.1	Symbols: EIL3, SLIM1, ATSLIM, AtEIL3 | ETHYLENE-INSENSITIVE3-like 3 | chr1:27730434-27732363 REVERSE LENGTH=567	0
assembly1599_828bp	AT5G09760.1	Symbols: | Plant invertase/pectin methylesterase inhibitor superfamily | chr5:3032446-3034364 FORWARD LENGTH=551	6e-17
assembly1600_500bp	AT3G28180.1	Symbols: ATCSLC04, CSLC04, ATCSLC4, CSLC4 | Cellulose-synthase-like C4 | chr3:10506110-10509067 FORWARD LENGTH=673	6e-11
assembly1601_1935bp	AT1G51520.2	Symbols: | RNA-binding (RRM/RBD/RNP motifs) family protein | chr1:19106789-19109093 FORWARD LENGTH=513	e-161
assembly1602_516bp	AT1G51520.2	Symbols: | RNA-binding (RRM/RBD/RNP motifs) family protein | chr1:19106789-19109093 FORWARD LENGTH=513	5e-47
assembly1603_1075bp	AT1G11570.2	Symbols: NTL | NTF2-like | chr1:3883280-3883956 FORWARD LENGTH=132	5e-68
assembly1604_1666bp	AT1G61790.1	Symbols: | Oligosaccharyltransferase complex/magnesium transporter family protein | chr1:22814390-22815430 FORWARD LENGTH=346	3e-98
assembly1605_488bp	NoHits
assembly1606_1023bp	AT5G07010.1	Symbols: ATST2A, ST2A | sulfotransferase 2A | chr5:2174960-2176039 REVERSE LENGTH=359	0
assembly1607_441bp	NoHits
assembly1608_1132bp	AT5G42940.1	Symbols: | RING/U-box superfamily protein | chr5:17216649-17219171 REVERSE LENGTH=691	2e-24
assembly1609_815bp	AT5G42940.1	Symbols: | RING/U-box superfamily protein | chr5:17216649-17219171 REVERSE LENGTH=691	2e-25
assembly1610_916bp	AT5G42940.1	Symbols: | RING/U-box superfamily protein | chr5:17216649-17219171 REVERSE LENGTH=691	4e-25
assembly1611_640bp	AT5G42940.1	Symbols: | RING/U-box superfamily protein | chr5:17216649-17219171 REVERSE LENGTH=691	4e-26
assembly1612_1355bp	NoHits
assembly1613_395bp	NoHits
assembly1614_317bp	NoHits
assembly1615_2463bp	NoHits
assembly1616_2368bp	NoHits
assembly1617_453bp	AT3G12530.1	Symbols: PSF2 | PSF2 | chr3:3972604-3973864 REVERSE LENGTH=210	5e-17
assembly1618_1025bp	AT3G12530.1	Symbols: PSF2 | PSF2 | chr3:3972604-3973864 REVERSE LENGTH=210	4e-19
assembly1619_1111bp	AT3G12530.1	Symbols: PSF2 | PSF2 | chr3:3972604-3973864 REVERSE LENGTH=210	2e-15
assembly1620_727bp	AT5G63530.1	Symbols: ATFP3, FP3 | farnesylated protein 3 | chr5:25433279-25435614 FORWARD LENGTH=355	2e-09
assembly1621_2367bp	AT3G05675.2	Symbols: | BTB/POZ domain-containing protein | chr3:1658425-1659859 REVERSE LENGTH=441	0
assembly1622_682bp	AT1G14450.1	Symbols: | NADH dehydrogenase (ubiquinone)s | chr1:4947337-4947558 REVERSE LENGTH=73	5e-42
assembly1623_697bp	AT1G14450.1	Symbols: | NADH dehydrogenase (ubiquinone)s | chr1:4947337-4947558 REVERSE LENGTH=73	7e-46
assembly1624_1332bp	AT3G21000.1	Symbols: | Gag-Pol-related retrotransposon family protein | chr3:7363921-7365138 FORWARD LENGTH=405	1e-06
assembly1625_745bp	NoHits
assembly1626_936bp	AT2G37770.2	Symbols: | NAD(P)-linked oxidoreductase superfamily protein | chr2:15834888-15836659 FORWARD LENGTH=315	e-102
assembly1627_860bp	AT2G37770.2	Symbols: | NAD(P)-linked oxidoreductase superfamily protein | chr2:15834888-15836659 FORWARD LENGTH=315	e-135
assembly1628_1003bp	NoHits
assembly1629_395bp	AT5G04550.1	Symbols: | Protein of unknown function (DUF668) | chr5:1303757-1305556 REVERSE LENGTH=599	3e-37
assembly1630_1029bp	AT5G04550.1	Symbols: | Protein of unknown function (DUF668) | chr5:1303757-1305556 REVERSE LENGTH=599	2e-34
assembly1631_624bp	AT5G04550.1	Symbols: | Protein of unknown function (DUF668) | chr5:1303757-1305556 REVERSE LENGTH=599	4e-36
assembly1632_2233bp	AT3G54950.1	Symbols: PLP7, PLA IIIA | patatin-like protein 6 | chr3:20359076-20360774 REVERSE LENGTH=488	0
assembly1633_1638bp	AT4G35040.1	Symbols: bZIP19 | Basic-leucine zipper (bZIP) transcription factor family protein | chr4:16680821-16681805 FORWARD LENGTH=261	e-134
assembly1634_1491bp	AT4G35040.1	Symbols: bZIP19 | Basic-leucine zipper (bZIP) transcription factor family protein | chr4:16680821-16681805 FORWARD LENGTH=261	e-128
assembly1635_595bp	AT1G23150.1	Symbols: | unknown protein; BEST Arabidopsis thaliana protein match is: unknown protein (TAIR:AT1G70780.1); Has 124 Blast hits to 124 proteins in 17 species: Archae - 0; Bacteria - 0; Metazoa - 0; Fungi - 0; Plants - 124; Viruses - 0; Other Eukaryotes - 0 (source: NCBI BLink). | chr1:8206948-8207461 FORWARD LENGTH=141	1e-66
assembly1636_588bp	AT1G23150.1	Symbols: | unknown protein; BEST Arabidopsis thaliana protein match is: unknown protein (TAIR:AT1G70780.1); Has 124 Blast hits to 124 proteins in 17 species: Archae - 0; Bacteria - 0; Metazoa - 0; Fungi - 0; Plants - 124; Viruses - 0; Other Eukaryotes - 0 (source: NCBI BLink). | chr1:8206948-8207461 FORWARD LENGTH=141	2e-67
assembly1637_528bp	AT1G23150.1	Symbols: | unknown protein; BEST Arabidopsis thaliana protein match is: unknown protein (TAIR:AT1G70780.1); Has 124 Blast hits to 124 proteins in 17 species: Archae - 0; Bacteria - 0; Metazoa - 0; Fungi - 0; Plants - 124; Viruses - 0; Other Eukaryotes - 0 (source: NCBI BLink). | chr1:8206948-8207461 FORWARD LENGTH=141	2e-30
assembly1638_1192bp	AT3G57280.1	Symbols: | Transmembrane proteins 14C | chr3:21193960-21195547 FORWARD LENGTH=226	e-111
assembly1639_1143bp	AT3G57280.1	Symbols: | Transmembrane proteins 14C | chr3:21193960-21195547 FORWARD LENGTH=226	e-137
assembly1640_2107bp	AT4G25430.1	Symbols: | unknown protein; BEST Arabidopsis thaliana protein match is: unknown protein (TAIR:AT5G51850.1); Has 30201 Blast hits to 17322 proteins in 780 species: Archae - 12; Bacteria - 1396; Metazoa - 17338; Fungi - 3422; Plants - 5037; Viruses - 0; Other Eukaryotes - 2996 (source: NCBI BLink). | chr4:12998571-13000211 FORWARD LENGTH=459	e-105
assembly1641_2002bp	AT1G06660.1	Symbols: | unknown protein; BEST Arabidopsis thaliana protein match is: unknown protein (TAIR:AT2G30820.2); Has 166 Blast hits to 144 proteins in 35 species: Archae - 0; Bacteria - 17; Metazoa - 13; Fungi - 20; Plants - 104; Viruses - 0; Other Eukaryotes - 12 (source: NCBI BLink). | chr1:2037461-2040148 REVERSE LENGTH=481	0
assembly1642_1271bp	AT2G46000.1	Symbols: | FUNCTIONS IN: molecular_function unknown; INVOLVED IN: biological_process unknown; LOCATED IN: endomembrane system; EXPRESSED IN: 24 plant structures; EXPRESSED DURING: 15 growth stages; CONTAINS InterPro DOMAIN/s: Mesoderm development candidate 2 (InterPro:IPR019330); Has 31 Blast hits to 31 proteins in 13 species: Archae - 0; Bacteria - 0; Metazoa - 5; Fungi - 0; Plants - 26; Viruses…	5e-96
assembly1643_2108bp	AT2G45990.1	Symbols: | unknown protein; FUNCTIONS IN: molecular_function unknown; INVOLVED IN: biological_process unknown; LOCATED IN: chloroplast, chloroplast stroma; EXPRESSED IN: 22 plant structures; EXPRESSED DURING: 13 growth stages; Has 312 Blast hits to 312 proteins in 90 species: Archae - 0; Bacteria - 131; Metazoa - 0; Fungi - 0; Plants - 67; Viruses - 0; Other Eukaryotes - 114 (source: NCBI BLink).…	e-146
assembly1644_1241bp	AT2G46000.1	Symbols: | FUNCTIONS IN: molecular_function unknown; INVOLVED IN: biological_process unknown; LOCATED IN: endomembrane system; EXPRESSED IN: 24 plant structures; EXPRESSED DURING: 15 growth stages; CONTAINS InterPro DOMAIN/s: Mesoderm development candidate 2 (InterPro:IPR019330); Has 31 Blast hits to 31 proteins in 13 species: Archae - 0; Bacteria - 0; Metazoa - 5; Fungi - 0; Plants - 26; Viruses…	1e-87
assembly1645_1612bp	AT5G53180.1	Symbols: ATPTB2, PTB2 | polypyrimidine tract-binding protein 2 | chr5:21568393-21571537 REVERSE LENGTH=429	0
assembly1646_331bp	NoHits
assembly1647_1256bp	AT2G23310.1	Symbols: ATRER1C1 | Rer1 family protein | chr2:9917643-9918913 FORWARD LENGTH=212	e-115
assembly1648_1318bp	AT1G13360.1	Symbols: | unknown protein; BEST Arabidopsis thaliana protein match is: unknown protein (TAIR:AT3G25870.1); Has 69 Blast hits to 69 proteins in 16 species: Archae - 0; Bacteria - 0; Metazoa - 6; Fungi - 0; Plants - 63; Viruses - 0; Other Eukaryotes - 0 (source: NCBI BLink). | chr1:4577229-4577813 REVERSE LENGTH=194	1e-84
assembly1649_2618bp	AT5G04590.1	Symbols: SIR | sulfite reductase | chr5:1319404-1322298 FORWARD LENGTH=642	0
assembly1650_339bp	AT2G47850.1	Symbols: | Zinc finger C-x8-C-x5-C-x3-H type family protein | chr2:19595953-19598119 FORWARD LENGTH=468	7e-09
assembly1651_472bp	NoHits
assembly1652_366bp	NoHits
assembly1653_409bp	NoHits
assembly1654_389bp	NoHits
assembly1655_506bp	NoHits
assembly1656_391bp	AT5G13990.1	Symbols: ATEXO70C2, EXO70C2 | exocyst subunit exo70 family protein C2 | chr5:4514680-4516767 REVERSE LENGTH=695	2e-60
assembly1657_382bp	NoHits
assembly1658_356bp	AT2G28390.1	Symbols: | SAND family protein | chr2:12139836-12143375 REVERSE LENGTH=607	5e-14
assembly1659_478bp	NoHits
assembly1660_766bp	AT4G33550.1	Symbols: | Bifunctional inhibitor/lipid-transfer protein/seed storage 2S albumin superfamily protein | chr4:16134538-16134930 FORWARD LENGTH=130	6e-65
assembly1661_402bp	AT3G17090.1	Symbols: | Protein phosphatase 2C family protein | chr3:5826984-5829327 FORWARD LENGTH=384	3e-75
assembly1662_301bp	AT4G31985.1	Symbols: | Ribosomal protein L39 family protein | chr4:15469931-15470366 FORWARD LENGTH=51	1e-24
assembly1663_359bp	AT1G73120.1	Symbols: | unknown protein; FUNCTIONS IN: molecular_function unknown; INVOLVED IN: response to oxidative stress; EXPRESSED IN: root, cultured cell; Has 36 Blast hits to 36 proteins in 8 species: Archae - 0; Bacteria - 0; Metazoa - 0; Fungi - 0; Plants - 36; Viruses - 0; Other Eukaryotes - 0 (source: NCBI BLink). | chr1:27497365-27497885 REVERSE LENGTH=109	6e-60
assembly1664_352bp	AT4G18340.1	Symbols: | Glycosyl hydrolase superfamily protein | chr4:10130245-10132019 REVERSE LENGTH=397	6e-52
assembly1665_528bp	NoHits
assembly1666_332bp	AT5G25490.1	Symbols: | Ran BP2/NZF zinc finger-like superfamily protein | chr5:8876639-8877339 FORWARD LENGTH=170	2e-10
assembly1667_489bp	AT3G09440.1	Symbols: | Heat shock protein 70 (Hsp 70) family protein | chr3:2903434-2905632 REVERSE LENGTH=649	1e-46
assembly1668_468bp	AT5G25240.1	Symbols: | unknown protein; FUNCTIONS IN: molecular_function unknown; INVOLVED IN: biological_process unknown; LOCATED IN: cellular_component unknown; EXPRESSED IN: 23 plant structures; EXPRESSED DURING: 13 growth stages; Has 1807 Blast hits to 1807 proteins in 277 species: Archae - 0; Bacteria - 0; Metazoa - 736; Fungi - 347; Plants - 385; Viruses - 0; Other Eukaryotes - 339 (source: NCBI BLink)…	1e-41
assembly1669_364bp	NoHits
assembly1670_309bp	NoHits
assembly1671_372bp	AT1G35180.1	Symbols: | TRAM, LAG1 and CLN8 (TLC) lipid-sensing domain containing protein | chr1:12877230-12878644 REVERSE LENGTH=231	5e-06
assembly1672_459bp	AT1G02140.1	Symbols: MEE63, MAGO, HAP1 | mago nashi family protein | chr1:403467-404401 REVERSE LENGTH=150	5e-12
assembly1673_312bp	AT5G47520.1	Symbols: AtRABA5a, RABA5a | RAB GTPase homolog A5A | chr5:19277596-19278366 REVERSE LENGTH=221	3e-17
assembly1674_409bp	AT5G51270.1	Symbols: | U-box domain-containing protein kinase family protein | chr5:20835137-20838262 REVERSE LENGTH=819	1e-66
assembly1675_428bp	AT3G02360.2	Symbols: | 6-phosphogluconate dehydrogenase family protein | chr3:482498-483958 FORWARD LENGTH=486	8e-31
assembly1676_365bp	AT5G19760.1	Symbols: | Mitochondrial substrate carrier family protein | chr5:6679591-6681845 REVERSE LENGTH=298	6e-12
assembly1677_606bp	AT1G20970.1	Symbols: | FUNCTIONS IN: molecular_function unknown; INVOLVED IN: biological_process unknown; LOCATED IN: plasma membrane, vacuole; EXPRESSED IN: guard cell, cultured cell; BEST Arabidopsis thaliana protein match is: proton pump interactor 1 (TAIR:AT4G27500.1); Has 30201 Blast hits to 17322 proteins in 780 species: Archae - 12; Bacteria - 1396; Metazoa - 17338; Fungi - 3422; Plants - 5037; Viruse…	5e-09
assembly1678_368bp	AT2G44450.1	Symbols: BGLU15 | beta glucosidase 15 | chr2:18340966-18343744 FORWARD LENGTH=506	4e-16
assembly1679_329bp	NoHits
assembly1680_359bp	NoHits
assembly1681_308bp	AT4G31430.2	Symbols: | unknown protein; LOCATED IN: plasma membrane; EXPRESSED IN: 25 plant structures; EXPRESSED DURING: 15 growth stages; Has 35333 Blast hits to 34131 proteins in 2444 species: Archae - 798; Bacteria - 22429; Metazoa - 974; Fungi - 991; Plants - 531; Viruses - 0; Other Eukaryotes - 9610 (source: NCBI BLink). | chr4:15248510-15252204 FORWARD LENGTH=574	4e-06
assembly1682_305bp	NoHits
assembly1683_508bp	AT5G10360.1	Symbols: EMB3010, RPS6B | Ribosomal protein S6e | chr5:3258734-3260142 REVERSE LENGTH=249	3e-24
assembly1684_904bp	AT2G42540.2	Symbols: COR15A, COR15 | cold-regulated 15a | chr2:17711241-17711966 REVERSE LENGTH=139	9e-09
assembly1685_308bp	NoHits
assembly1686_332bp	NoHits
assembly1687_314bp	AT3G55280.1	Symbols: RPL23AB | ribosomal protein L23AB | chr3:20500667-20501519 FORWARD LENGTH=154	2e-22
assembly1688_342bp	NoHits
assembly1689_300bp	AT3G25230.2	Symbols: ROF1, ATFKBP62, FKBP62 | rotamase FKBP 1 | chr3:9188257-9191175 FORWARD LENGTH=562	2e-20
assembly1690_554bp	AT1G76890.2	Symbols: GT2, AT-GT2 | Duplicated homeodomain-like superfamily protein | chr1:28873211-28875203 REVERSE LENGTH=575	2e-92
assembly1691_372bp	AT1G17140.1	Symbols: ICR1, RIP1 | interactor of constitutive active rops 1 | chr1:5856740-5857861 REVERSE LENGTH=344	1e-14
assembly1692_333bp	AT1G17140.1	Symbols: ICR1, RIP1 | interactor of constitutive active rops 1 | chr1:5856740-5857861 REVERSE LENGTH=344	4e-18
assembly1693_464bp	NoHits
assembly1694_456bp	AT4G30996.1	Symbols: | Protein of unknown function (DUF1068) | chr4:15101464-15102461 FORWARD LENGTH=172	2e-15
assembly1695_434bp	ATMG00860.1	Symbols: ORF158 | DNA/RNA polymerases superfamily protein | chrM:235916-236392 FORWARD LENGTH=158	7e-24
assembly1696_364bp	NoHits
assembly1697_422bp	AT3G18420.1	Symbols: | Protein prenylyltransferase superfamily protein | chr3:6324771-6325721 REVERSE LENGTH=316	3e-88
assembly1698_390bp	AT3G30390.1	Symbols: | Transmembrane amino acid transporter family protein | chr3:11977112-11978827 REVERSE LENGTH=460	1e-06
assembly1699_311bp	NoHits
assembly1700_401bp	NoHits
assembly1701_734bp	NoHits
assembly1702_371bp	AT5G08370.1	Symbols: AtAGAL2, AGAL2 | alpha-galactosidase 2 | chr5:2691116-2693441 REVERSE LENGTH=396	1e-22
assembly1703_513bp	NoHits
assembly1704_397bp	NoHits
assembly1705_391bp	AT3G01180.1	Symbols: AtSS2, SS2 | starch synthase 2 | chr3:62456-65678 REVERSE LENGTH=792	2e-84
assembly1706_443bp	AT4G39600.1	Symbols: | Galactose oxidase/kelch repeat superfamily protein | chr4:18389436-18390539 REVERSE LENGTH=367	4e-17
assembly1707_471bp	NoHits
assembly1708_365bp	NoHits
assembly1709_381bp	NoHits
assembly1710_799bp	AT5G12930.1	Symbols: | unknown protein; Has 1807 Blast hits to 1807 proteins in 277 species: Archae - 0; Bacteria - 0; Metazoa - 736; Fungi - 347; Plants - 385; Viruses - 0; Other Eukaryotes - 339 (source: NCBI BLink). | chr5:4083155-4085222 REVERSE LENGTH=439	1e-53
assembly1711_358bp	NoHits
assembly1712_374bp	AT5G25220.1	Symbols: KNAT3 | KNOTTED1-like homeobox gene 3 | chr5:8736208-8738115 FORWARD LENGTH=431	3e-08
assembly1713_528bp	NoHits
assembly1714_370bp	AT3G09930.1	Symbols: | GDSL-like Lipase/Acylhydrolase superfamily protein | chr3:3053356-3055203 FORWARD LENGTH=354	1e-22
assembly1715_443bp	AT3G19370.1	Symbols: | Plant protein of unknown function (DUF869) | chr3:6711046-6713494 FORWARD LENGTH=704	3e-07
assembly1716_365bp	AT4G17050.1	Symbols: UGLYAH | ureidoglycine aminohydrolase | chr4:9589662-9592413 FORWARD LENGTH=298	2e-11
assembly1717_434bp	AT4G35350.1	Symbols: XCP1 | xylem cysteine peptidase 1 | chr4:16810529-16811875 FORWARD LENGTH=355	3e-67
assembly1718_341bp	NoHits
assembly1719_333bp	NoHits
assembly1720_521bp	AT2G28160.1	Symbols: FIT1, ATBHLH029, FRU, BHLH029, ATBHLH29, ATFIT1 | FER-like regulator of iron uptake | chr2:12004713-12005908 FORWARD LENGTH=318	1e-87
assembly1721_477bp	AT5G23630.1	Symbols: PDR2, MIA | phosphate deficiency response 2 | chr5:7960756-7967644 REVERSE LENGTH=1179	2e-18
assembly1722_328bp	AT4G40060.1	Symbols: ATHB16, ATHB-16, HB16 | homeobox protein 16 | chr4:18571682-18572774 REVERSE LENGTH=294	6e-13
assembly1723_413bp	AT3G53720.1	Symbols: ATCHX20, CHX20 | cation/H+ exchanger 20 | chr3:19905826-19910027 REVERSE LENGTH=842	3e-07
assembly1724_504bp	NoHits
assembly1725_374bp	AT4G36250.1	Symbols: ALDH3F1 | aldehyde dehydrogenase 3F1 | chr4:17151029-17153381 FORWARD LENGTH=484	5e-17
assembly1726_638bp	AT3G47110.1	Symbols: | Leucine-rich repeat protein kinase family protein | chr3:17347103-17350296 REVERSE LENGTH=1025	9e-71
assembly1727_371bp	AT1G24320.1	Symbols: | Six-hairpin glycosidases superfamily protein | chr1:8626437-8630935 REVERSE LENGTH=789	8e-52
assembly1728_334bp	NoHits
assembly1729_731bp	NoHits
assembly1730_370bp	NoHits
assembly1731_327bp	NoHits
assembly1732_445bp	NoHits
assembly1733_374bp	NoHits
assembly1734_322bp	NoHits
assembly1735_587bp	AT5G38990.1	Symbols: | Malectin/receptor-like protein kinase family protein | chr5:15608824-15611466 FORWARD LENGTH=880	3e-42
assembly1736_306bp	NoHits
assembly1737_526bp	AT5G14720.1	Symbols: | Protein kinase superfamily protein | chr5:4748212-4752642 REVERSE LENGTH=674	2e-13
assembly1738_328bp	NoHits
assembly1739_472bp	NoHits
assembly1740_351bp	AT5G22310.1	Symbols: | unknown protein; BEST Arabidopsis thaliana protein match is: unknown protein (TAIR:AT3G11590.1); Has 30201 Blast hits to 17322 proteins in 780 species: Archae - 12; Bacteria - 1396; Metazoa - 17338; Fungi - 3422; Plants - 5037; Viruses - 0; Other Eukaryotes - 2996 (source: NCBI BLink). | chr5:7383742-7385345 REVERSE LENGTH=481	2e-43
assembly1741_755bp	AT5G64340.1	Symbols: SAC51 | sequence-specific DNA binding transcription factors;transcription regulators | chr5:25730890-25731936 REVERSE LENGTH=348	9e-25
assembly1742_331bp	NoHits
assembly1743_449bp	AT4G18280.1	Symbols: | glycine-rich cell wall protein-related | chr4:10104082-10104555 FORWARD LENGTH=157	4e-08
assembly1744_366bp	NoHits
assembly1745_519bp	AT3G51800.2	Symbols: ATG2, EBP1, ATEBP1 | metallopeptidase M24 family protein | chr3:19211261-19213568 REVERSE LENGTH=401	3e-38
assembly1746_337bp	AT5G35930.1	Symbols: | AMP-dependent synthetase and ligase family protein | chr5:14067197-14074404 REVERSE LENGTH=1040	7e-06
assembly1747_367bp	AT5G26280.1	Symbols: | TRAF-like family protein | chr5:9208724-9210403 FORWARD LENGTH=350	6e-51
assembly1748_310bp	NoHits
assembly1749_490bp	NoHits
assembly1750_462bp	AT4G18980.1	Symbols: AtS40-3 | AtS40-3 | chr4:10398973-10399293 FORWARD LENGTH=106	4e-31
assembly1751_418bp	NoHits
assembly1752_344bp	NoHits
assembly1753_470bp	AT1G18450.1	Symbols: ATARP4, ARP4 | actin-related protein 4 | chr1:6348199-6351766 FORWARD LENGTH=441	5e-07
assembly1754_398bp	AT3G58500.1	Symbols: PP2A-4 | protein phosphatase 2A-4 | chr3:21635503-21638911 REVERSE LENGTH=313	6e-07
assembly1755_308bp	AT2G06510.1	Symbols: ATRPA1A, RPA1A, RPA70A, ATRPA70A | replication protein A 1A | chr2:2585215-2587601 FORWARD LENGTH=640	3e-07
assembly1756_310bp	AT1G65790.1	Symbols: ARK1, RK1 | receptor kinase 1 | chr1:24468932-24472329 FORWARD LENGTH=843	7e-31
assembly1757_373bp	AT1G18800.1	Symbols: NRP2 | NAP1-related protein 2 | chr1:6481466-6483463 REVERSE LENGTH=256	8e-10
assembly1758_524bp	AT3G08860.1	Symbols: PYD4 | PYRIMIDINE 4 | chr3:2696754-2699087 REVERSE LENGTH=481	6e-88
assembly1759_401bp	NoHits
assembly1760_524bp	AT4G35180.1	Symbols: LHT7 | LYS/HIS transporter 7 | chr4:16738517-16740385 REVERSE LENGTH=478	3e-67
assembly1761_440bp	AT5G04310.1	Symbols: | Pectin lyase-like superfamily protein | chr5:1203356-1207352 REVERSE LENGTH=518	4e-30
assembly1762_315bp	AT5G51940.1	Symbols: NRPB6A, NRPD6A, NRPE6A | RNA polymerase Rpb6 | chr5:21104679-21105796 FORWARD LENGTH=144	2e-34
assembly1763_338bp	NoHits
assembly1764_872bp	AT1G45050.1	Symbols: ATUBC2-1, UBC15 | Ubiquitin-conjugating enzyme family protein | chr1:17031337-17032967 FORWARD LENGTH=161	3e-17
assembly1765_489bp	AT4G10270.1	Symbols: | Wound-responsive family protein | chr4:6374805-6375077 FORWARD LENGTH=90	9e-38
assembly1766_562bp	AT2G41680.1	Symbols: NTRC | NADPH-dependent thioredoxin reductase C | chr2:17376349-17379028 REVERSE LENGTH=529	3e-08
assembly1767_540bp	AT1G73700.1	Symbols: | MATE efflux family protein | chr1:27717554-27719630 REVERSE LENGTH=476	6e-46
assembly1768_507bp	AT3G61760.1	Symbols: ADL1B, DL1B | DYNAMIN-like 1B | chr3:22860546-22864092 REVERSE LENGTH=610	1e-64
assembly1769_347bp	NoHits
assembly1770_442bp	AT2G22795.1	Symbols: | unknown protein; BEST Arabidopsis thaliana protein match is: unknown protein (TAIR:AT4G37820.1); Has 799854 Blast hits to 188815 proteins in 4452 species: Archae - 4529; Bacteria - 144236; Metazoa - 287749; Fungi - 87083; Plants - 43826; Viruses - 3662; Other Eukaryotes - 228769 (source: NCBI BLink). | chr2:9697380-9699584 REVERSE LENGTH=734	8e-17
assembly1771_343bp	AT5G02840.1	Symbols: LCL1 | LHY/CCA1-like 1 | chr5:648794-651212 FORWARD LENGTH=293	2e-07
assembly1772_398bp	AT5G66140.1	Symbols: PAD2 | proteasome alpha subunit D2 | chr5:26437445-26438677 REVERSE LENGTH=250	7e-43
assembly1773_498bp	AT2G09990.1	Symbols: | Ribosomal protein S5 domain 2-like superfamily protein | chr2:3781442-3781882 FORWARD LENGTH=146	1e-58
assembly1774_393bp	NoHits
assembly1775_313bp	NoHits
assembly1776_370bp	AT5G25820.1	Symbols: | Exostosin family protein | chr5:8997248-8999574 REVERSE LENGTH=654	1e-81
assembly1777_366bp	AT2G38120.1	Symbols: AUX1, WAV5, PIR1, MAP1 | Transmembrane amino acid transporter family protein | chr2:15973493-15976792 FORWARD LENGTH=485	1e-06
assembly1778_784bp	AT1G47260.1	Symbols: APFI, GAMMA CA2 | gamma carbonic anhydrase 2 | chr1:17321384-17323347 REVERSE LENGTH=278	1e-10
assembly1779_315bp	NoHits
assembly1780_489bp	AT5G49945.1	Symbols: | Protein of unknown function (DUF1682) | chr5:20317418-20319432 FORWARD LENGTH=480	2e-09
assembly1781_361bp	NoHits
assembly1782_399bp	AT3G06290.1	Symbols: | SAC3/GANP/Nin1/mts3/eIF-3 p25 family | chr3:1899123-1907297 REVERSE LENGTH=1697	1e-25
assembly1783_352bp	AT1G09240.1	Symbols: NAS3, ATNAS3 | nicotianamine synthase 3 | chr1:2984950-2985912 FORWARD LENGTH=320	5e-06
assembly1784_475bp	NoHits
assembly1785_420bp	AT3G10370.1	Symbols: SDP6 | FAD-dependent oxidoreductase family protein | chr3:3216502-3219027 FORWARD LENGTH=629	2e-38
assembly1786_517bp	NoHits
assembly1787_543bp	NoHits
assembly1788_418bp	NoHits
assembly1789_602bp	AT2G41840.1	Symbols: | Ribosomal protein S5 family protein | chr2:17460016-17461398 REVERSE LENGTH=285	1e-81
assembly1790_320bp	NoHits
assembly1791_413bp	AT5G56630.1	Symbols: PFK7 | phosphofructokinase 7 | chr5:22924311-22926728 FORWARD LENGTH=485	2e-28
assembly1792_419bp	NoHits
assembly1793_323bp	AT1G65790.1	Symbols: ARK1, RK1 | receptor kinase 1 | chr1:24468932-24472329 FORWARD LENGTH=843	2e-21
assembly1794_314bp	NoHits
assembly1795_417bp	AT3G14270.1	Symbols: FAB1B | phosphatidylinositol-4-phosphate 5-kinase family protein | chr3:4754624-4761185 FORWARD LENGTH=1791	5e-67
assembly1796_312bp	AT2G21330.1	Symbols: FBA1 | fructose-bisphosphate aldolase 1 | chr2:9128416-9130152 REVERSE LENGTH=399	4e-09
assembly1797_347bp	NoHits
assembly1798_384bp	AT4G22330.1	Symbols: ATCES1 | Alkaline phytoceramidase (aPHC) | chr4:11798483-11799549 FORWARD LENGTH=255	2e-32
assembly1799_328bp	NoHits
assembly1800_334bp	NoHits
assembly1801_301bp	AT4G39520.1	Symbols: | GTP-binding protein-related | chr4:18371329-18374000 REVERSE LENGTH=369	8e-32
assembly1802_497bp	AT5G14030.1	Symbols: | translocon-associated protein beta (TRAPB) family protein | chr5:4526878-4528253 FORWARD LENGTH=195	4e-12
assembly1803_427bp	NoHits
assembly1804_387bp	AT3G18410.1	Symbols: | Complex I subunit NDUFS6 | chr3:6323203-6323761 FORWARD LENGTH=106	2e-33
assembly1805_326bp	AT2G46770.1	Symbols: NST1, EMB2301, ANAC043 | NAC (No Apical Meristem) domain transcriptional regulator superfamily protein | chr2:19220917-19222822 REVERSE LENGTH=365	5e-59
assembly1806_389bp	NoHits
assembly1807_310bp	AT4G29090.1	Symbols: | Ribonuclease H-like superfamily protein | chr4:14333528-14335255 FORWARD LENGTH=575	3e-18
assembly1808_509bp	NoHits
assembly1809_372bp	AT5G22740.1	Symbols: ATCSLA02, CSLA02, ATCSLA2, CSLA2 | cellulose synthase-like A02 | chr5:7555379-7559866 REVERSE LENGTH=534	3e-06
assembly1810_418bp	AT3G02760.1	Symbols: | Class II aaRS and biotin synthetases superfamily protein | chr3:597588-600650 REVERSE LENGTH=883	3e-27
assembly1811_503bp	AT5G40610.1	Symbols: | NAD-dependent glycerol-3-phosphate dehydrogenase family protein | chr5:16265071-16267258 REVERSE LENGTH=400	1e-50
assembly1812_498bp	AT1G07710.1	Symbols: | Ankyrin repeat family protein | chr1:2386275-2387986 REVERSE LENGTH=543	2e-19
assembly1813_308bp	NoHits
assembly1814_380bp	NoHits
assembly1815_371bp	AT5G13420.1	Symbols: | Aldolase-type TIM barrel family protein | chr5:4302080-4304212 REVERSE LENGTH=438	2e-06
assembly1816_402bp	NoHits
assembly1817_311bp	AT4G18195.1	Symbols: ATPUP8, PUP8 | purine permease 8 | chr4:10069718-10070974 FORWARD LENGTH=394	2e-40
assembly1818_524bp	NoHits
assembly1819_353bp	NoHits
assembly1820_418bp	AT2G43480.1	Symbols: | Peroxidase superfamily protein | chr2:18053009-18054350 FORWARD LENGTH=335	9e-16
assembly1821_380bp	AT2G32000.1	Symbols: | DNA topoisomerase, type IA, core | chr2:13615999-13621563 REVERSE LENGTH=865	1e-06
assembly1822_394bp	AT1G11240.1	Symbols: | CONTAINS InterPro DOMAIN/s: Nucleolar protein 12 (InterPro:IPR019186); Has 2484 Blast hits to 1934 proteins in 262 species: Archae - 0; Bacteria - 90; Metazoa - 921; Fungi - 378; Plants - 144; Viruses - 18; Other Eukaryotes - 933 (source: NCBI BLink). | chr1:3766936-3768212 REVERSE LENGTH=200	5e-10
assembly1823_420bp	AT5G64550.1	Symbols: | loricrin-related | chr5:25801794-25803698 REVERSE LENGTH=634	9e-13
assembly1824_542bp	NoHits
assembly1825_393bp	AT1G53200.1	Symbols: | unknown protein; Has 21 Blast hits to 21 proteins in 9 species: Archae - 0; Bacteria - 2; Metazoa - 0; Fungi - 0; Plants - 19; Viruses - 0; Other Eukaryotes - 0 (source: NCBI BLink). | chr1:19840486-19843169 REVERSE LENGTH=613	1e-15
assembly1826_335bp	AT5G54160.1	Symbols: ATOMT1, OMT1 | O-methyltransferase 1 | chr5:21982075-21984167 FORWARD LENGTH=363	4e-09
assembly1827_303bp	AT2G43910.2	Symbols: ATHOL1, HOL1 | HARMLESS TO OZONE LAYER 1 | chr2:18184596-18186951 REVERSE LENGTH=246	3e-11
assembly1828_301bp	NoHits
assembly1829_453bp	NoHits
assembly1830_426bp	AT3G58970.1	Symbols: MGT6, MRS2-4 | magnesium transporter 6 | chr3:21789659-21791163 REVERSE LENGTH=436	9e-09
assembly1831_359bp	AT1G48440.1	Symbols: | B-cell receptor-associated 31-like | chr1:17907075-17908327 FORWARD LENGTH=129	4e-29
assembly1832_509bp	AT5G45380.1	Symbols: ATDUR3, DUR3 | solute:sodium symporters;urea transmembrane transporters | chr5:18391337-18395696 FORWARD LENGTH=704	2e-07
assembly1833_443bp	NoHits
assembly1834_564bp	AT3G27810.1	Symbols: ATMYB21, ATMYB3, MYB21 | myb domain protein 21 | chr3:10307596-10310093 FORWARD LENGTH=226	3e-68
assembly1835_484bp	NoHits
assembly1836_624bp	AT1G47389.1	Symbols: | unknown protein; FUNCTIONS IN: molecular_function unknown; INVOLVED IN: biological_process unknown; LOCATED IN: cellular_component unknown; Has 12 Blast hits to 12 proteins in 1 species: Archae - 0; Bacteria - 0; Metazoa - 0; Fungi - 0; Plants - 12; Viruses - 0; Other Eukaryotes - 0 (source: NCBI BLink). | chr1:17378652-17379374 FORWARD LENGTH=240	9e-07
assembly1837_412bp	AT5G39990.1	Symbols: | Core-2/I-branching beta-1,6-N-acetylglucosaminyltransferase family protein | chr5:16004494-16006428 FORWARD LENGTH=447	9e-08
assembly1838_324bp	NoHits
assembly1839_349bp	AT5G58120.1	Symbols: | Disease resistance protein (TIR-NBS-LRR class) family | chr5:23517492-23520927 FORWARD LENGTH=1046	1e-21
assembly1840_541bp	NoHits
assembly1841_368bp	AT3G17800.2	Symbols: | Protein of unknown function (DUF760) | chr3:6091248-6092873 REVERSE LENGTH=427	9e-08
assembly1842_347bp	AT1G68480.1	Symbols: JAG | C2H2 and C2HC zinc fingers superfamily protein | chr1:25684543-25685932 REVERSE LENGTH=253	3e-11
assembly1843_366bp	ATMG00860.1	Symbols: ORF158 | DNA/RNA polymerases superfamily protein | chrM:235916-236392 FORWARD LENGTH=158	4e-19
assembly1844_309bp	AT3G10410.1	Symbols: SCPL49, CPY | SERINE CARBOXYPEPTIDASE-LIKE 49 | chr3:3235518-3238063 REVERSE LENGTH=516	4e-12
assembly1845_307bp	NoHits
assembly1846_444bp	AT4G18960.1	Symbols: AG | K-box region and MADS-box transcription factor family protein | chr4:10383917-10388272 FORWARD LENGTH=252	4e-25
assembly1847_342bp	NoHits
assembly1848_897bp	NoHits
assembly1849_375bp	AT1G32150.1	Symbols: bZIP68, AtbZIP68 | basic region/leucine zipper transcription factor 68 | chr1:11566022-11568317 FORWARD LENGTH=389	9e-13
assembly1850_508bp	AT1G32150.1	Symbols: bZIP68, AtbZIP68 | basic region/leucine zipper transcription factor 68 | chr1:11566022-11568317 FORWARD LENGTH=389	2e-12
assembly1851_494bp	NoHits
assembly1852_1506bp	AT1G51110.1	Symbols: | Plastid-lipid associated protein PAP / fibrillin family protein | chr1:18935380-18937484 FORWARD LENGTH=409	0
assembly1853_589bp	NoHits
assembly1854_312bp	AT3G17700.1	Symbols: CNBT1, CNGC20, ATCNGC20 | cyclic nucleotide-binding transporter 1 | chr3:6049074-6052449 FORWARD LENGTH=764	4e-47
assembly1855_365bp	AT3G43810.1	Symbols: CAM7 | calmodulin 7 | chr3:15664619-15666355 REVERSE LENGTH=149	5e-65
assembly1856_333bp	AT2G25000.1	Symbols: WRKY60, ATWRKY60 | WRKY DNA-binding protein 60 | chr2:10629812-10631095 FORWARD LENGTH=271	3e-17
assembly1857_1377bp	AT1G74070.1	Symbols: | Cyclophilin-like peptidyl-prolyl cis-trans isomerase family protein | chr1:27851749-27852861 REVERSE LENGTH=317	e-143
assembly1858_1296bp	AT1G74070.1	Symbols: | Cyclophilin-like peptidyl-prolyl cis-trans isomerase family protein | chr1:27851749-27852861 REVERSE LENGTH=317	e-149
assembly1859_321bp	NoHits
assembly1860_2238bp	AT2G20780.1	Symbols: | Major facilitator superfamily protein | chr2:8947496-8949170 REVERSE LENGTH=526	0
assembly1861_361bp	NoHits
assembly1862_2092bp	AT2G29990.1	Symbols: NDA2 | alternative NAD(P)H dehydrogenase 2 | chr2:12793562-12795913 REVERSE LENGTH=508	0
assembly1863_2012bp	AT2G29990.1	Symbols: NDA2 | alternative NAD(P)H dehydrogenase 2 | chr2:12793562-12795913 REVERSE LENGTH=508	0
assembly1864_451bp	AT2G44350.2	Symbols: ATCS, CSY4 | Citrate synthase family protein | chr2:18316673-18320524 FORWARD LENGTH=474	1e-11
assembly1865_912bp	AT1G17410.1	Symbols: | Nucleoside diphosphate kinase family protein | chr1:5968627-5969780 REVERSE LENGTH=181	3e-94
assembly1866_351bp	AT2G07360.2	Symbols: | SH3 domain-containing protein | chr2:3047623-3057099 REVERSE LENGTH=1198	2e-09
assembly1867_458bp	AT1G59820.1	Symbols: ALA3 | aminophospholipid ATPase 3 | chr1:22011599-22020023 FORWARD LENGTH=1213	1e-08
assembly1868_391bp	NoHits
assembly1869_363bp	NoHits
assembly1870_608bp	AT5G39660.1	Symbols: CDF2 | cycling DOF factor 2 | chr5:15878920-15880712 FORWARD LENGTH=457	8e-42
assembly1871_818bp	NoHits
assembly1872_622bp	AT4G16190.1	Symbols: | Papain family cysteine protease | chr4:9171512-9172877 FORWARD LENGTH=373	1e-11
assembly1873_367bp	NoHits
assembly1874_694bp	AT5G62200.1	Symbols: | Embryo-specific protein 3, (ATS3) | chr5:24984463-24985674 REVERSE LENGTH=190	2e-70
assembly1875_872bp	AT5G62200.1	Symbols: | Embryo-specific protein 3, (ATS3) | chr5:24984463-24985674 REVERSE LENGTH=190	2e-44
assembly1876_397bp	NoHits
assembly1877_319bp	AT3G53370.1	Symbols: | S1FA-like DNA-binding protein | chr3:19788159-19788737 REVERSE LENGTH=76	1e-14
assembly1878_391bp	NoHits
assembly1879_341bp	AT1G54520.1	Symbols: | unknown protein; FUNCTIONS IN: molecular_function unknown; INVOLVED IN: biological_process unknown; LOCATED IN: chloroplast; EXPRESSED IN: 24 plant structures; EXPRESSED DURING: 15 growth stages; CONTAINS InterPro DOMAIN/s: Protein of unknown function DUF1517 (InterPro:IPR010903); Has 276 Blast hits to 275 proteins in 83 species: Archae - 0; Bacteria - 108; Metazoa - 6; Fungi - 0; Plan…	7e-09
assembly1880_631bp	NoHits
assembly1881_896bp	NoHits
assembly1882_2390bp	AT4G18470.1	Symbols: SNI1 | negative regulator of systemic acquired resistance (SNI1) | chr4:10192984-10195511 FORWARD LENGTH=432	0
assembly1883_2050bp	AT4G10955.1	Symbols: | alpha/beta-Hydrolases superfamily protein | chr4:6713778-6715372 REVERSE LENGTH=350	0
assembly1884_460bp	AT1G53040.1	Symbols: | Protein of unknown function (DUF616) | chr1:19764567-19766870 REVERSE LENGTH=540	1e-35
assembly1885_613bp	AT1G53040.1	Symbols: | Protein of unknown function (DUF616) | chr1:19764567-19766870 REVERSE LENGTH=540	6e-35
assembly1886_6012bp	AT4G32820.2	Symbols: | Tetratricopeptide repeat (TPR)-like superfamily protein | chr4:15831679-15841454 REVERSE LENGTH=1872	0
assembly1887_6048bp	AT4G32820.2	Symbols: | Tetratricopeptide repeat (TPR)-like superfamily protein | chr4:15831679-15841454 REVERSE LENGTH=1872	0
assembly1888_330bp	AT1G69920.1	Symbols: ATGSTU12, GSTU12 | glutathione S-transferase TAU 12 | chr1:26334395-26335537 REVERSE LENGTH=254	3e-18
assembly1889_376bp	ATMG00810.1	Symbols: ORF240B | DNA/RNA polymerases superfamily protein | chrM:227709-228431 REVERSE LENGTH=240	1e-48
assembly1890_312bp	AT5G02502.1	Symbols: | Oligosaccaryltransferase | chr5:558604-558711 REVERSE LENGTH=35	2e-08
assembly1891_526bp	NoHits
assembly1892_435bp	NoHits
assembly1893_352bp	AT1G23410.1	Symbols: | Ribosomal protein S27a / Ubiquitin family protein | chr1:8314940-8315410 FORWARD LENGTH=156	1e-48
assembly1894_630bp	NoHits
assembly1895_314bp	NoHits
assembly1896_417bp	NoHits
assembly1897_365bp	AT4G03040.1	Symbols: | BEST Arabidopsis thaliana protein match is: Polynucleotidyl transferase, ribonuclease H-like superfamily protein (TAIR:AT5G33330.1); Has 18 Blast hits to 18 proteins in 2 species: Archae - 0; Bacteria - 0; Metazoa - 0; Fungi - 0; Plants - 18; Viruses - 0; Other Eukaryotes - 0 (source: NCBI BLink). | chr4:1341083-1343140 FORWARD LENGTH=92	2e-07
assembly1898_535bp	AT4G13410.1	Symbols: ATCSLA15, CSLA15 | Nucleotide-diphospho-sugar transferases superfamily protein | chr4:7792219-7795824 REVERSE LENGTH=537	4e-78
assembly1899_704bp	AT2G24120.1	Symbols: PDE319, SCA3 | DNA/RNA polymerases superfamily protein | chr2:10249358-10254530 REVERSE LENGTH=993	3e-13
assembly1900_527bp	AT2G24120.1	Symbols: PDE319, SCA3 | DNA/RNA polymerases superfamily protein | chr2:10249358-10254530 REVERSE LENGTH=993	2e-13
assembly1901_330bp	NoHits
assembly1902_504bp	NoHits
assembly1903_1169bp	AT4G17540.1	Symbols: | unknown protein; Has 30201 Blast hits to 17322 proteins in 780 species: Archae - 12; Bacteria - 1396; Metazoa - 17338; Fungi - 3422; Plants - 5037; Viruses - 0; Other Eukaryotes - 2996 (source: NCBI BLink). | chr4:9775982-9777765 FORWARD LENGTH=294	e-126
assembly1904_1248bp	AT4G17540.1	Symbols: | unknown protein; Has 30201 Blast hits to 17322 proteins in 780 species: Archae - 12; Bacteria - 1396; Metazoa - 17338; Fungi - 3422; Plants - 5037; Viruses - 0; Other Eukaryotes - 2996 (source: NCBI BLink). | chr4:9775982-9777765 FORWARD LENGTH=294	1e-85
assembly1905_342bp	AT4G35800.1	Symbols: NRPB1, RPB1, RNA_POL_II_LSRNA_POL_II_LS, RNA_POL_II_LS | RNA polymerase II large subunit | chr4:16961115-16967892 REVERSE LENGTH=1839	2e-38
assembly1906_434bp	AT3G52100.1	Symbols: | RING/FYVE/PHD-type zinc finger family protein | chr3:19319343-19322773 FORWARD LENGTH=696	3e-28
assembly1907_535bp	AT3G52100.1	Symbols: | RING/FYVE/PHD-type zinc finger family protein | chr3:19319343-19322773 FORWARD LENGTH=696	1e-19
assembly1908_586bp	AT5G57350.1	Symbols: AHA3, ATAHA3, HA3 | H(+)-ATPase 3 | chr5:23231208-23236381 REVERSE LENGTH=949	5e-20
assembly1909_499bp	AT5G57350.1	Symbols: AHA3, ATAHA3, HA3 | H(+)-ATPase 3 | chr5:23231208-23236381 REVERSE LENGTH=949	6e-24
assembly1910_333bp	NoHits
assembly1911_568bp	AT1G12900.1	Symbols: GAPA-2 | glyceraldehyde 3-phosphate dehydrogenase A subunit 2 | chr1:4392634-4394283 REVERSE LENGTH=399	e-106
assembly1912_418bp	AT2G38430.1	Symbols: | unknown protein; BEST Arabidopsis thaliana protein match is: unknown protein (TAIR:AT3G54310.1); Has 35333 Blast hits to 34131 proteins in 2444 species: Archae - 798; Bacteria - 22429; Metazoa - 974; Fungi - 991; Plants - 531; Viruses - 0; Other Eukaryotes - 9610 (source: NCBI BLink). | chr2:16092950-16094810 REVERSE LENGTH=393	2e-06
assembly1913_748bp	AT5G38480.1	Symbols: GRF3, RCI1 | general regulatory factor 3 | chr5:15410277-15411285 FORWARD LENGTH=255	e-117
assembly1914_357bp	AT4G24280.1	Symbols: cpHsc70-1 | chloroplast heat shock protein 70-1 | chr4:12590094-12593437 FORWARD LENGTH=718	2e-46
assembly1915_435bp	AT1G71865.1	Symbols: | unknown protein; FUNCTIONS IN: molecular_function unknown; INVOLVED IN: biological_process unknown; LOCATED IN: chloroplast; Has 33 Blast hits to 33 proteins in 11 species: Archae - 0; Bacteria - 0; Metazoa - 0; Fungi - 0; Plants - 33; Viruses - 0; Other Eukaryotes - 0 (source: NCBI BLink). | chr1:27030117-27030416 FORWARD LENGTH=99	6e-12
assembly1916_474bp	AT1G71865.1	Symbols: | unknown protein; FUNCTIONS IN: molecular_function unknown; INVOLVED IN: biological_process unknown; LOCATED IN: chloroplast; Has 33 Blast hits to 33 proteins in 11 species: Archae - 0; Bacteria - 0; Metazoa - 0; Fungi - 0; Plants - 33; Viruses - 0; Other Eukaryotes - 0 (source: NCBI BLink). | chr1:27030117-27030416 FORWARD LENGTH=99	8e-12
assembly1917_380bp	AT2G39730.1	Symbols: RCA | rubisco activase | chr2:16570951-16573345 REVERSE LENGTH=474	2e-25
assembly1918_520bp	AT1G71150.1	Symbols: | unknown protein; BEST Arabidopsis thaliana protein match is: unknown protein (TAIR:AT1G22970.1); Has 105 Blast hits to 103 proteins in 41 species: Archae - 0; Bacteria - 2; Metazoa - 42; Fungi - 6; Plants - 48; Viruses - 0; Other Eukaryotes - 7 (source: NCBI BLink). | chr1:26827189-26828515 FORWARD LENGTH=351	5e-26
assembly1919_414bp	AT3G03700.1	Symbols: | Plasma-membrane choline transporter family protein | chr3:916503-918327 FORWARD LENGTH=482	3e-12
assembly1920_306bp	AT5G47430.1	Symbols: | DWNN domain, a CCHC-type zinc finger | chr5:19235819-19240596 REVERSE LENGTH=892	2e-24
assembly1921_335bp	AT3G10360.1	Symbols: APUM4, PUM4 | pumilio 4 | chr3:3211276-3215144 REVERSE LENGTH=1003	6e-53
assembly1922_315bp	AT2G17410.1	Symbols: | ARID/BRIGHT DNA-binding domain-containing protein | chr2:7559869-7563474 FORWARD LENGTH=786	2e-08
assembly1923_321bp	AT5G48657.1	Symbols: | defense protein-related | chr5:19734019-19734845 REVERSE LENGTH=245	1e-32
assembly1924_765bp	AT3G10910.1	Symbols: | RING/U-box superfamily protein | chr3:3413068-3413613 REVERSE LENGTH=181	5e-76
assembly1925_1187bp	AT2G35410.1	Symbols: | RNA-binding (RRM/RBD/RNP motifs) family protein | chr2:14898341-14899590 FORWARD LENGTH=308	e-119
assembly1926_806bp	AT1G63460.1	Symbols: GPX8, ATGPX8 | glutathione peroxidase 8 | chr1:23535118-23536326 FORWARD LENGTH=167	e-112
assembly1927_2476bp	AT4G21650.1	Symbols: | Subtilase family protein | chr4:11501314-11504656 REVERSE LENGTH=766	0
assembly1928_1167bp	AT1G76020.1	Symbols: | Thioredoxin superfamily protein | chr1:28532243-28533542 REVERSE LENGTH=225	e-117
assembly1929_2126bp	AT3G48000.1	Symbols: ALDH2B4, ALDH2, ALDH2A | aldehyde dehydrogenase 2B4 | chr3:17717082-17719843 REVERSE LENGTH=538	0
assembly1930_1049bp	AT1G14060.1	Symbols: | GCK domain-containing protein | chr1:4817354-4817893 REVERSE LENGTH=179	3e-44
assembly1931_1676bp	AT1G07360.1	Symbols: | CCCH-type zinc fingerfamily protein with RNA-binding domain | chr1:2260562-2262795 REVERSE LENGTH=481	0
assembly1932_2571bp	AT3G51050.1	Symbols: | FG-GAP repeat-containing protein | chr3:18954023-18957698 FORWARD LENGTH=698	0
assembly1933_2744bp	AT5G60600.1	Symbols: GCPE, ISPG, CSB3, CLB4, HDS | 4-hydroxy-3-methylbut-2-enyl diphosphate synthase | chr5:24359447-24363274 FORWARD LENGTH=741	0
assembly1934_2644bp	AT1G10180.1	Symbols: | BEST Arabidopsis thaliana protein match is: exocyst complex component 84B (TAIR:AT5G49830.1); Has 132 Blast hits to 132 proteins in 25 species: Archae - 0; Bacteria - 0; Metazoa - 7; Fungi - 0; Plants - 117; Viruses - 0; Other Eukaryotes - 8 (source: NCBI BLink). | chr1:3338381-3341494 REVERSE LENGTH=769	0
assembly1935_387bp	NoHits
assembly1936_420bp	AT3G15530.1	Symbols: | S-adenosyl-L-methionine-dependent methyltransferases superfamily protein | chr3:5253253-5254193 REVERSE LENGTH=288	8e-10
assembly1937_975bp	AT1G07890.3	Symbols: APX1, MEE6, CS1, ATAPX1, ATAPX01 | ascorbate peroxidase 1 | chr1:2438005-2439435 FORWARD LENGTH=250	e-146
assembly1938_445bp	AT1G79920.1	Symbols: | Heat shock protein 70 (Hsp 70) family protein | chr1:30058935-30062224 REVERSE LENGTH=831	4e-38
assembly1939_1047bp	AT1G29230.1	Symbols: CIPK18, SnRK3.20, ATWL1, WL1, ATCIPK18 | CBL-interacting protein kinase 18 | chr1:10214860-10216422 FORWARD LENGTH=520	e-118
assembly1940_915bp	AT2G32290.1	Symbols: BMY5, BAM6 | beta-amylase 6 | chr2:13714643-13716906 REVERSE LENGTH=577	e-140
assembly1941_576bp	AT4G15802.1	Symbols: HSBP, AtHSBP | heat shock factor binding protein | chr4:8986864-8988339 REVERSE LENGTH=86	6e-10
assembly1942_1830bp	NoHits
assembly1943_1414bp	AT3G15800.1	Symbols: | Glycosyl hydrolase superfamily protein | chr3:5345051-5346988 FORWARD LENGTH=399	0
assembly1944_2052bp	AT3G47340.1	Symbols: ASN1, DIN6, AT-ASN1 | glutamine-dependent asparagine synthase 1 | chr3:17438136-17441043 REVERSE LENGTH=584	0
assembly1945_913bp	AT5G56940.1	Symbols: | Ribosomal protein S16 family protein | chr5:23030879-23032200 FORWARD LENGTH=135	2e-82
assembly1946_359bp	NoHits
assembly1947_387bp	AT4G35840.1	Symbols: | RING/U-box superfamily protein | chr4:16981083-16982266 FORWARD LENGTH=236	4e-31
assembly1948_314bp	NoHits
assembly1949_334bp	NoHits
assembly1950_371bp	AT2G21060.1	Symbols: ATGRP2B, ATCSP4, GRP2B | glycine-rich protein 2B | chr2:9036983-9037588 REVERSE LENGTH=201	2e-26
assembly1951_2281bp	AT5G52860.1	Symbols: | ABC-2 type transporter family protein | chr5:21419776-21421545 REVERSE LENGTH=589	0
assembly1952_2154bp	AT2G03020.1	Symbols: | Heat shock protein HSP20/alpha crystallin family | chr2:882927-884081 REVERSE LENGTH=255	3e-28
assembly1953_379bp	NoHits
assembly1954_1929bp	AT5G06830.1	Symbols: | unknown protein; CONTAINS InterPro DOMAIN/s: Protein of unknown function DUF773 (InterPro:IPR008491); Has 365 Blast hits to 359 proteins in 109 species: Archae - 9; Bacteria - 13; Metazoa - 209; Fungi - 7; Plants - 47; Viruses - 0; Other Eukaryotes - 80 (source: NCBI BLink). | chr5:2116882-2119559 REVERSE LENGTH=549	0
assembly1955_2146bp	AT3G12200.2	Symbols: Nek7 | NIMA-related kinase 7 | chr3:3887173-3890550 REVERSE LENGTH=581	0
assembly1956_1371bp	AT1G54020.2	Symbols: | GDSL-like Lipase/Acylhydrolase superfamily protein | chr1:20161805-20163706 REVERSE LENGTH=372	0
assembly1957_595bp	AT4G09490.1	Symbols: | Polynucleotidyl transferase, ribonuclease H-like superfamily protein | chr4:6015583-6016575 REVERSE LENGTH=170	5e-22
assembly1958_2644bp	AT1G18550.1	Symbols: | ATP binding microtubule motor family protein | chr1:6381656-6384340 REVERSE LENGTH=725	0
assembly1959_3255bp	AT3G07400.1	Symbols: | lipase class 3 family protein | chr3:2367456-2372238 FORWARD LENGTH=1003	0
assembly1960_311bp	AT1G73810.1	Symbols: | Core-2/I-branching beta-1,6-N-acetylglucosaminyltransferase family protein | chr1:27752506-27755208 REVERSE LENGTH=418	3e-11
assembly1961_1714bp	AT4G33820.1	Symbols: | Glycosyl hydrolase superfamily protein | chr4:16217010-16219515 REVERSE LENGTH=570	0
assembly1962_1939bp	AT1G18090.1	Symbols: | 5'-3' exonuclease family protein | chr1:6224539-6227715 FORWARD LENGTH=577	0
assembly1963_966bp	AT4G38100.1	Symbols: | unknown protein; LOCATED IN: chloroplast thylakoid membrane; EXPRESSED IN: 23 plant structures; EXPRESSED DURING: 13 growth stages; BEST Arabidopsis thaliana protein match is: unknown protein (TAIR:AT4G01150.1); Has 30201 Blast hits to 17322 proteins in 780 species: Archae - 12; Bacteria - 1396; Metazoa - 17338; Fungi - 3422; Plants - 5037; Viruses - 0; Other Eukaryotes - 2996 (source:…	2e-86
assembly1964_2346bp	AT5G39980.1	Symbols: | Tetratricopeptide repeat (TPR)-like superfamily protein | chr5:16001036-16003072 REVERSE LENGTH=678	0
assembly1965_1105bp	AT1G64260.1	Symbols: | MuDR family transposase | chr1:23847756-23849915 FORWARD LENGTH=719	1e-21
assembly1966_1035bp	AT5G62210.1	Symbols: | Embryo-specific protein 3, (ATS3) | chr5:24986521-24987477 REVERSE LENGTH=223	2e-78
assembly1967_1851bp	AT2G30320.1	Symbols: | Pseudouridine synthase family protein | chr2:12925728-12927896 REVERSE LENGTH=510	0
assembly1968_1500bp	AT1G18710.1	Symbols: AtMYB47, MYB47 | myb domain protein 47 | chr1:6450781-6452986 FORWARD LENGTH=267	3e-87
assembly1969_1859bp	AT1G71090.1	Symbols: | Auxin efflux carrier family protein | chr1:26812551-26813924 FORWARD LENGTH=457	0
assembly1970_1932bp	AT2G28100.1	Symbols: ATFUC1, FUC1 | alpha-L-fucosidase 1 | chr2:11974803-11976489 FORWARD LENGTH=506	0
assembly1971_1211bp	AT3G12145.1	Symbols: FLR1, FLOR1 | Leucine-rich repeat (LRR) family protein | chr3:3874764-3876075 REVERSE LENGTH=325	e-167
assembly1972_3440bp	AT4G02010.1	Symbols: | Protein kinase superfamily protein | chr4:881457-885222 FORWARD LENGTH=725	0
assembly1973_1246bp	AT5G24490.1	Symbols: | 30S ribosomal protein, putative | chr5:8365690-8367178 FORWARD LENGTH=308	e-165
assembly1974_2750bp	AT4G34710.1	Symbols: ADC2, SPE2, ATADC2 | arginine decarboxylase 2 | chr4:16560315-16562450 REVERSE LENGTH=711	0
assembly1975_1536bp	AT2G40010.1	Symbols: | Ribosomal protein L10 family protein | chr2:16708578-16710448 REVERSE LENGTH=317	0
assembly1976_534bp	AT3G18060.1	Symbols: | transducin family protein / WD-40 repeat family protein | chr3:6183880-6186788 FORWARD LENGTH=609	1e-12
assembly1977_1167bp	AT5G06360.1	Symbols: | Ribosomal protein S8e family protein | chr5:1944835-1946512 FORWARD LENGTH=260	e-177
assembly1978_1572bp	AT5G06360.1	Symbols: | Ribosomal protein S8e family protein | chr5:1944835-1946512 FORWARD LENGTH=260	e-174
assembly1979_460bp	NoHits
assembly1980_791bp	NoHits
assembly1981_1760bp	AT1G18030.1	Symbols: | Protein phosphatase 2C family protein | chr1:6204400-6206678 FORWARD LENGTH=351	e-108
assembly1982_1609bp	AT1G18030.1	Symbols: | Protein phosphatase 2C family protein | chr1:6204400-6206678 FORWARD LENGTH=351	e-141
assembly1983_867bp	NoHits
assembly1984_714bp	AT1G18030.1	Symbols: | Protein phosphatase 2C family protein | chr1:6204400-6206678 FORWARD LENGTH=351	1e-07
assembly1985_1387bp	AT2G23790.1	Symbols: | Protein of unknown function (DUF607) | chr2:10125692-10127455 REVERSE LENGTH=336	0
assembly1986_1880bp	AT2G23790.1	Symbols: | Protein of unknown function (DUF607) | chr2:10125692-10127455 REVERSE LENGTH=336	1e-90
assembly1987_2093bp	AT2G23790.1	Symbols: | Protein of unknown function (DUF607) | chr2:10125692-10127455 REVERSE LENGTH=336	7e-90
assembly1988_1951bp	AT2G02570.1	Symbols: | nucleic acid binding;RNA binding | chr2:698361-700794 REVERSE LENGTH=300	e-123
assembly1989_1876bp	AT2G02570.1	Symbols: | nucleic acid binding;RNA binding | chr2:698361-700794 REVERSE LENGTH=300	e-128
assembly1990_1453bp	AT3G54210.1	Symbols: | Ribosomal protein L17 family protein | chr3:20067672-20068385 REVERSE LENGTH=211	e-121
assembly1991_2102bp	AT1G60810.1	Symbols: ACLA-2 | ATP-citrate lyase A-2 | chr1:22388691-22390993 REVERSE LENGTH=423	0
assembly1992_1898bp	AT1G10670.3	Symbols: ACLA-1 | ATP-citrate lyase A-1 | chr1:3535787-3538098 FORWARD LENGTH=443	0
assembly1993_1326bp	AT1G69560.1	Symbols: MYB105, LOF2, ATMYB105 | myb domain protein 105 | chr1:26157755-26158906 FORWARD LENGTH=330	e-124
assembly1994_1225bp	AT1G69560.1	Symbols: MYB105, LOF2, ATMYB105 | myb domain protein 105 | chr1:26157755-26158906 FORWARD LENGTH=330	e-148
assembly1995_643bp	AT3G11910.1	Symbols: UBP13 | ubiquitin-specific protease 13 | chr3:3761758-3770290 REVERSE LENGTH=1115	4e-46
assembly1996_664bp	AT3G11910.1	Symbols: UBP13 | ubiquitin-specific protease 13 | chr3:3761758-3770290 REVERSE LENGTH=1115	5e-46
assembly1997_1996bp	AT2G38330.1	Symbols: | MATE efflux family protein | chr2:16064571-16067318 FORWARD LENGTH=521	0
assembly1998_1915bp	AT2G38330.1	Symbols: | MATE efflux family protein | chr2:16064571-16067318 FORWARD LENGTH=521	0
[truncated: 88,233 more rows]
