# Supplementary material for: Transcriptomic profiling of purple broccoli reveals light-induced anthocyanin biosynthetic signaling and structural genes
Source: PeerJ. 2020 May 5;8:e8870. doi: 10.7717/peerj.8870 (PMC7207213; doi:10.7717/peerj.8870)
Supplement: Table S7 [file peerj-08-8870-s012.xlsx]

## Sheet: Sheet1
Table S5 assemble unigenes FPKM value
gene_id	A53CK_2	A53CK_3	A53CK_4	A53WJ_1	A53WJ_2	A53WJ_3	B53CK_1	B53CK_2	B53CK_4	B53WJ_5	B53WJ_6	B53WJ_7	C53CK_5	C53CK_6	C53CK_7	C53WJ_1	C53WJ_2	C53WJ_4
assembly10000_2297bp	0	0.366046	1.12334	0.0526909	0	0.420064	0.283126	0	2.28114e-10	0	0.260663	1.59393e-22	2.78132e-10	0	5.00379e-09	0	0.932367	1.02418e-16
assembly10001_590bp	0	1.60303	2.71852	0.505498	0	0.573792	1.03415	0	1.75467	0	1.22157	0	0.426855	0	0	0	0.996047	0
assembly10002_321bp	0	2.5686	0.887112	0	0	0.91389	4.8991	0	0	0	0	0	0.673483	0	0	0	0	0
assembly10003_2203bp	608.671	555.087	547.619	340.689	303.042	371.858	455.983	488.476	443.69	584.954	521.795	539.901	423.066	326.592	389.24	461.409	372.147	392.689
assembly10004_569bp	0	0	0	0	0	0	0	0	0	0	0	0	0	0	0	0	0	0
assembly10005_2734bp	0.23064	5.04451	7.97863	2.87692	0.271776	5.41024	4.70269	0.148297	2.29279	0.245309	5.9775	0.903524	2.20612	0.365658	2.24829	0.176389	5.90331	1.89763
assembly10006_2033bp	147.286	168.242	159.948	152.29	119.196	149.164	125.146	141.788	141.256	133.843	146.179	150.171	138.105	129.124	144.961	150.315	131.145	143.929
assembly10007_367bp	0	2.20795	8.0242	11.2586	21.0049	0	0	8.52593	6.15219e-19	3.61081	2.55194	0	2.71752	14.5348	19.5436	14.0319	4.33181	4.69468
assembly10008_2489bp	60.5049	54.3055	48.0745	113.566	163.241	81.6103	118.817	94.1982	115.304	68.8451	80.8762	83.7576	150.707	126.25	186.701	59.4867	108.209	78.6393
assembly10009_1408bp	8.21486	4.51036	3.08135	7.01574	4.81245	0.21209	3.36092	6.10281	6.91486	8.65262	5.21662	2.08592	3.69407	9.84541	4.50374	4.93077	2.56523	6.78972
assembly1000_831bp	0	7.07938	9.46377	2.93599	0.17107	3.54259	4.11651	0	1.33068	0	9.50478	2.126	1.76348	0.351109	1.31699	0	5.76591	1.0899
assembly10010_5048bp	2.45511	1.72085	2.05963	2.45314	2.39957	0.960901	0.905962	3.30716	1.36599	1.7504	2.04464	2.16717	1.55435	1.85294	2.56152	1.49133	1.06875	2.43778
assembly10011_715bp	10.0247	7.37411	6.24251	5.65564	11.807	7.09089	7.08911	10.837	4.24932	8.17932	5.11645	8.04443	4.39506	10.3891	9.74327	10.5778	5.99704	6.08228
assembly10012_5145bp	1.342	0.931423	2.36423	1.31061	1.19386	2.30037	2.85402	1.49772	0.763199	0.985489	2.12977	1.24887	1.05151	1.01252	1.38707	1.02431	2.40171	1.28584
assembly10013_1749bp	3.73711	2.8614	1.8168	3.59746	3.75794	10.3538	1.44614	4.29145	4.26849	2.92758	1.59238	4.9058	3.28697	3.79876	6.12162	3.15596	4.61646	1.37402
assembly10014_1492bp	5.42697	5.48768	6.21629	6.01935	8.62337	17.567	6.61397	6.72121	6.15017	12.3017	9.74856	4.27132	7.06201	6.75127	5.10046	9.52382	9.47745	5.90146
assembly10015_2227bp	5.67204	5.17871	6.18183	1.83672	9.76734	3.50054	3.66484	12.3201	3.14067	8.53473	5.54102	3.88958	2.37293	6.66848	1.92964	8.42417	5.07536	6.03061
assembly10016_2018bp	28.0078	22.1683	24.8486	35.4739	37.6631	39.23	25.3597	35.5497	16.916	32.8847	20.3769	17.5484	16.6602	36.0422	15.1836	24.9848	40.5279	35.2369
assembly10017_4520bp	46.1086	43.5035	45.126	45.0603	47.9536	30.8081	50.8043	37.5775	42.5221	52.7839	56.5856	37.6473	34.2624	41.5397	45.9986	50.0997	35.9583	53.4031
assembly10018_4478bp	168.475	177.63	171.064	179.496	171.915	190.529	167.805	176.373	172.76	150.512	180.156	161.085	174.144	179.622	172.273	181.736	188.925	157.143
assembly10019_922bp	0.669578	1.13739	1.56065	2.55649	2.60724	2.74464	1.39721	2.89809	0.466469	1.01269	0.298118	0.9435	0.481706	4.02419	0.963941	2.80587	2.03315	1.90481
assembly1001_744bp	30.4521	34.4905	28.0211	27.4714	39.3922	30.8463	26.425	35.3644	26.58	29.6788	24.7414	27.6959	33.9432	28.7011	36.3924	34.8976	29.1706	30.3124
assembly10020_636bp	2.26644	2.90767	2.10321	0.908426	2.3095	0.50904	0.466512	1.6419	2.34159	0.84766	2.58725	2.41955	1.84636	2.2223	1.15766	1.74778	2.27196	0.97936
assembly10021_3524bp	0	0.726662	1.77691	0.549401	0.061611	0.877393	0.324204	0	0.287361	0.0552636	1.80635	0.0355516	0.221802	0.0317545	0.239571	0	0.671036	0.187856
assembly10022_3420bp	0	1.45109	2.13583	0.134923	0.033451	0.460903	1.06627	0.0257182	0.474159	1.56919e-18	0.722309	0.314111	0.576965	0	0.311001	0.0189025	1.41518	0.250153
assembly10023_3084bp	4.50439	4.04168	4.37322	4.33965	4.45276	5.73537	6.53769	4.5203	4.91523	7.35128	4.77253	5.07617	3.0044	4.85822	3.1557	7.86445	7.16526	7.58872
assembly10024_2757bp	10.8837	9.27022	6.44864	10.1422	11.2805	7.04699	7.58858	9.62228	6.98087	7.52899	3.45583	12.7186	5.99461	12.477	8.99689	8.29018	7.20919	6.07864
assembly10025_2584bp	6.42081	8.27011	2.46551	7.32793	8.68767	5.50077	3.21044	6.85308	6.87735	6.55847	6.14923	6.05351	7.21432	8.08753	9.40971	6.80378	7.05194	8.60649
assembly10026_2710bp	13.4487	3.50649	7.97161	10.0707	17.4974	9.79822	6.05522	9.28162	5.36979	18.1993	14.0018	6.52114	2.19881	14.6312	6.64337	15.7881	5.9203	7.25865
assembly10027_2175bp	5.91172	9.57155	9.12535	8.46844	10.4339	4.77721	11.2965	11.6905	8.70521	5.56498	5.34869	3.77055	7.00153	8.58039	5.3714	11.2246	5.92997	6.15794
assembly10028_598bp	0	1.23903	1.64773	0.565798	0	1.64141	0	0	0.331666	0	1.09708	0	0.791922	0	1.18883	0	1.1782	1.54264
assembly10029_1183bp	0	1.17395	1.52466	0.408832	0	0	0.851086	0	0	0	0.510346	0	0	0	0.272519	0.0785071	0.804598	0.309737
assembly1002_1662bp	0	1.11047	1.47539	0.459877	0	0.757708	0.967429	0	0.18123	0	1.22526	0.180045	0.508806	0.0573799	0.520695	0	1.085	0.284058
assembly10030_398bp	2.76781	3.21707	4.08206	3.71102	1.64397	0.323786	1.22909	6.12086	1.71187	1.26011	0.364053	3.42299	2.19095	2.93931	1.93161	3.58944	0.603796	1.27673
assembly10031_3607bp	0.145433	1.23184	2.10606	0.549005	0.174623	0.980934	1.23709	0.157113	0.687792	0.262671	1.29586	0.261267	0.355801	0.393613	0.48057	0.265178	1.31838	0.653793
assembly10032_1714bp	0	1.12849	2.37263	1.28304	0.570663	2.00188	1.21161	0.148198	0.113347	0.0867985	0.828954	0.436629	0.963047	0.197035	0.680419	0.110341	1.72154	0.534964
assembly10033_1128bp	0	3.84894e-08	1.08009e-19	0.0203335	0	1.3771e-17	1.83868e-09	0	0	0	7.53857e-25	5.63035e-28	7.70214e-15	0	0.358372	0.0361471	0.360277	0.131692
assembly10034_1216bp	0	0.67746	1.32885	0.286584	0	1.28515	0.642274	0	0.122085	0	0.523379	0.241449	0.659807	0	0.00422013	0.0313709	0.104336	4.59043e-11
assembly10035_329bp	0	0	0.598243	0.536497	0	0.606373	2.10965	0	0	0	3.23	0	0	0	0.5748	0	0.530774	0
assembly10036_384bp	4.40475	3.23958	2.80677	0	0	0	0	1.95188	0	1.11808	1.50898	0	0	0	0.620633	0	0	1.35186
assembly10037_1307bp	0	0	0	0	0	0	0	0	0	0	0	0	0	0	0	0	0	0
assembly10038_2114bp	0	0.10722	0	0	0	0.0566755	0	0	0	0	0	0	0.0446986	0	0	0.0285483	0.149757	0
assembly10039_2041bp	2.1831e-48	0.0135469	2.44534e-07	2.2453e-20	4.71632e-22	4.15865e-08	5.59614e-16	0	0.00854621	1.07838e-23	9.12798e-05	2.07801e-21	2.31046e-19	0	0.74408	6.17122e-25	2.59957e-15	2.1779e-19
assembly1003_2203bp	0.0895262	1.50098	3.22721	1.89371	0.270375	1.8518	1.78948	0	0.815483	0.0413494	2.52699	0.664851	0.316127	0.0940218	0.488748	0.0257745	2.19233	0.290776
assembly10040_3980bp	0.0659664	0.647518	1.38925	1.01385	2.53168e-22	0.442588	0.142472	6.65319e-42	0.551866	0.0236124	1.14005	0.0383021	0.433626	1.0569e-36	0.0205363	0.00230517	0.536958	0.148914
assembly10041_2363bp	1.54566e-18	0.00276494	0.21017	0.000571997	4.20663e-22	3.50195e-20	2.66051e-14	0	1.56724e-06	0.0610751	0.00333139	0.000448752	0.0198516	0	0.0351934	1.22921e-05	3.26046e-18	1.27442e-14
assembly10042_3801bp	3.98176e-44	0.921048	1.21259	0.0782518	0.137524	1.16748	1.41353	0.0525549	0.118048	5.95288e-24	0.336333	0.282079	0.102188	0.071604	0.0612386	0.0757603	0.960482	0.43246
assembly10043_1161bp	121.616	105.128	100.593	106.321	118.419	87.7871	109.875	88.3541	102.775	129.156	146.109	145.676	83.7165	71.3719	93.2379	87.4061	78.8982	95.1215
assembly10044_4431bp	46.5014	36.5224	35.3477	38.3087	45.8144	35.7302	33.8301	34.9503	32.777	44.8824	42.483	42.2903	27.3163	34.4888	33.8228	39.2202	31.449	36.6242
assembly10045_1767bp	0	1.16982	2.17831	0.703698	0	1.81467	2.08803	0	0.239071	0	2.71793	0.783525	0.275056	0.0573732	0.778988	0	1.35735	0.281938
assembly10046_1653bp	0	1.53654	2.12575	0.363668	0.0756189	0.592655	1.04139	0	0.608338	0.0697309	1.33134	0.701302	0.535704	0	0.376727	0.0429183	1.45623	0.658301
assembly10047_553bp	33.632	21.5479	20.7823	13.7492	25.6902	20.6694	26.3213	26.7106	15.2386	39.1269	19.1382	21.8255	23.0492	30.5646	27.153	38.2028	21.1298	19.9327
assembly10048_4711bp	25.5779	23.6575	25.3915	22.2203	20.7049	22.4899	22.7294	20.9699	23.7069	21.5349	22.6931	22.5896	18.1751	22.8748	21.8842	22.3238	22.9559	19.2688
assembly10049_2068bp	7.01825	5.28881	3.06935	2.90392	5.45231	8.72662	5.23622	4.80281	2.807	6.32268	3.3046	4.87107	7.53418	9.31864	7.9316	8.7081	3.15203	4.56541
assembly1004_8482bp	0.0118768	1.46401	2.80862	0.353465	0.0597062	1.38648	1.50068	0.0274034	0.393255	0.0215134	1.79076	0.227919	0.407701	0.0124035	0.279786	0.0134956	1.60105	0.336903
assembly10050_5516bp	2.32421	2.06323	1.89295	1.03134	0.516637	2.38414	1.1384	1.31497	2.01702	1.29808	2.26514	0.800446	0.758584	0.735421	0.575982	1.14491	1.39905	0.961107
assembly10051_1588bp	15.6773	16.3623	11.1883	24.6511	20.4945	24.8179	20.1225	17.2584	13.5704	14.0771	15.8033	15.5597	11.7105	17.0139	13.1868	17.3855	14.0818	13.6042
assembly10052_848bp	40.8322	32.7025	29.4409	26.6086	17.483	25.0768	20.9242	31.725	24.6694	43.5954	24.1282	25.8833	19.795	18.9887	16.9383	29.8399	17.2746	21.7144
assembly10053_3321bp	0	0.658809	0.920496	0.541647	0	1.16356	0.292283	0	0.244742	0	0.514423	0	0.124724	0	0	0.0745183	0.0685814	0
assembly10054_1144bp	0	0.472975	0.250868	0.326329	0	0.369542	0.231337	0	0	0	0	0	0	0	0.112991	0	0	0.123938
assembly10055_4926bp	0.0195857	1.07788	1.84178	0.278537	0	0.855221	0.757024	0.104161	0.197587	0.017661	0.619891	0.285849	0.119364	0.0810922	0.208174	0.0886814	0.603781	0.168635
assembly10056_876bp	0	0.09207	0.299866	0.166045	0	0	0.179038	0	0	0	0.327728	0	0.163801	0	0.0918416	2.99331e-24	0.434324	1.33123e-16
assembly10057_1360bp	23.8899	32.6552	36.9616	93.7858	112.012	87.072	24.3309	75.6737	21.5533	26.1623	17.732	16.9215	46.0931	71.107	19.7129	18.362	147.567	49.4185
assembly10058_2613bp	11.6139	7.46077	11.6815	12.5292	14.728	16.5071	5.73164	13.1159	12.7151	14.7798	10.1795	7.7728	9.17419	19.8317	12.1486	13.3157	14.725	15.2249
assembly10059_432bp	1.93537e-51	9.19526e-42	3.27626e-24	7.34132e-52	9.61983e-25	4.18472e-23	2.03153	4.85813e-53	6.86604e-24	1.75815e-25	1.74989e-27	1.96394e-53	0.446508	3.51877e-29	1.77205e-29	5.31767e-52	0.480115	2.75445e-46
assembly1005_336bp	0.770039	0	0	0	0	1.75325	0	0	0	0.678145	0.986352	0	0	0	0	0	0	0.877765
assembly10060_841bp	0	0.232257	0	0	0	2.09171e-13	0	0	0	0	0	0	0	0	0	0	0.219829	0
assembly10061_408bp	1.25006e-32	1.62927e-42	3.24022e-24	0.428692	7.13589e-25	1.44799e-21	2.26648e-24	2.03191e-49	3.42588e-24	1.30321e-25	0.553085	3.90905e-06	0.38626	1.67399	1.17653e-29	3.61792e-37	0.43252	9.83743e-33
assembly10062_2195bp	4.90315	1.16223	0.0173836	0.1047	8.74145	4.30283	3.0438	11.4036	1.77748	0.185976	0.297915	0.103148	1.02408	2.28688	1.37345	0.0664146	1.87978	0.410259
assembly10063_536bp	0	0	2.40933e-08	0	0	0.394198	0	0	0	0	0	0	0.626067	0	0	0	0	0
assembly10064_2106bp	13.7511	18.8587	21.4201	35.6403	21.254	26.4223	18.3925	8.31324	16.6334	16.9837	24.0273	14.4838	21.4845	31.0026	22.6527	24.1257	21.0496	25.3863
assembly10065_969bp	6.61726	4.70946	2.69744	3.84253	8.12102	11.8175	3.38591	6.24642	1.78143	8.91246	3.51863	2.13336	1.2052	6.94961	3.06785	7.26708	3.83182	2.89052
assembly10066_1108bp	1.83714	0.748655	3.67625	0.224266	2.95575	3.94713	0.19108	2.79554	2.71279	3.91029	2.36179	7.49646	4.76133	2.95912	2.82405	1.51795	0.974064	2.56795
assembly10067_2244bp	1.9876	5.36411	1.76693	5.63981	11.4864	11.0862	7.07473	4.58495	2.11088	5.35886	1.37275	2.70829	4.02125	9.24341	2.79679	9.19136	3.54937	1.86701
assembly10068_682bp	0	0	0.326377	0	0	0	0	0	0	0	0.356379	0	0	0	0	0	0.573941	0.312662
assembly10069_1041bp	0	0.0743879	0.446188	0.000494763	0	0.570649	0.283716	0	0.080355	0	0.732157	0	0.488465	0	0.147437	0	0.686319	0.150411
assembly1006_882bp	43.7182	34.3181	27.2323	14.3241	7.64971	18.0769	26.8845	26.5706	22.2264	33.3086	24.5265	46.9306	37.953	31.7061	37.8043	36.8744	31.3197	17.5253
assembly10070_2155bp	7.2832	6.81679	1.43381	7.64148	5.01126	5.3696	6.49586	4.68011	2.72146	5.42655	4.48014	6.13288	2.67156	3.78152	4.03388	4.56399	1.47838	4.14781
assembly10071_1067bp	0	0.0553683	0.715745	0.516105	0	0.162617	0.632005	0	0.0590825	0	0.360611	0	1.0971e-20	0	0.0963201	0	7.41846e-05	0
assembly10072_1624bp	5.24444	7.92955	3.95427	5.41767	6.10899	2.15813	5.44762	7.34267	4.90444	7.17169	5.02515	6.4635	2.02341	4.72253	6.18112	6.162	0.711046	3.18529
assembly10073_1388bp	6.37883	5.01218	6.48462	5.60378	4.76605	2.02096	6.17782	3.9668	6.01802	4.84649	4.81072	2.70052	5.88214	7.1319	12.0239	5.33009	11.0922	6.59887
assembly10074_1411bp	8.80258	6.69699	3.87486	1.91226	7.07764	2.86655	4.35927	4.00826	4.101	3.64837	6.58306	3.68617	9.76541	9.81345	5.04005	3.09524	4.33004	4.1368
assembly10075_2758bp	19.1867	11.3784	15.6271	36.8134	83.4541	21.4587	42.9819	43.7171	35.0091	22.677	20.9407	19.3837	61.1061	64.2794	94.6027	19.078	42.4057	20.0164
assembly10076_2949bp	0	1.33252	4.07441	0.723187	0.0687089	1.29614	1.61182	0	0.696646	0	1.47637	0.238217	0.49437	0	0.48583	0	1.28141	0.310895
assembly10077_4920bp	9.98762	8.61796	9.6611	5.62634	4.94137	8.14663	6.00173	9.38005	9.11119	6.72435	5.20225	6.85185	4.24716	6.58792	3.60429	8.5389	7.0816	3.50027
assembly10078_4801bp	16.6371	13.0892	10.2213	7.04754	6.59197	6.32988	11.2097	9.01276	7.08626	14.0967	12.0305	8.96902	5.35417	8.70604	7.15853	11.7161	5.54751	6.88095
assembly10079_6984bp	36.4456	25.4899	25.3719	26.7161	27.5362	27.7725	26.7278	26.5831	26.3352	34.5949	26.9542	19.4021	17.4064	34.2903	18.0022	37.627	25.2316	19.9799
assembly1007_2161bp	0.213576	0.473426	1.05717	0.676411	0.672454	0.816727	0.677493	0.600071	0.3286	0.425669	0.501039	0.141253	0.181922	0.222826	0.122613	0.197314	0.752855	0.582195
assembly10080_2819bp	50.3328	46.9346	43.5304	43.5946	56.9936	43.5068	42.9445	51.0632	45.0289	50.9727	46.9813	40.6147	43.5587	50.2591	53.3658	48.3666	45.3134	45.0731
assembly10081_1945bp	0	1.57573	3.35251	1.06553	0.0774811	0.929205	0.683488	0	0.761984	0.0707591	1.45318	0.740098	0.287508	0	0.324086	0	1.69301	0.365791
assembly10082_3154bp	0.0680863	2.14699	3.10794	1.23855	0.510685	1.57372	1.05715	0.0260852	1.10235	0.0309106	1.9649	0.587396	1.18799	0.213021	0.33777	0.0389046	2.53526	1.42856
assembly10083_612bp	7.39819	2.42754	5.6516	8.6197	3.46375	2.58979	2.35202	3.16084	3.95968	7.2873	3.50522	7.09624	1.91717	11.0569	1.66215	5.56965	2.13244	1.86173
assembly10084_698bp	16.7047	7.29967	5.68681	19.1534	21.1847	17.344	5.90822	13.4845	7.06456	5.4672	5.63135	6.68541	6.70037	5.18682	8.79256	10.4021	15.8172	3.28898
assembly10085_861bp	35.9341	30.6492	39.7884	51.2784	32.6745	51.8427	45.3204	49.5561	39.3889	39.3428	47.161	45.7128	87.0561	55.2496	50.7836	49.6373	40.4517	51.3429
assembly10086_437bp	21.3173	28.5659	7.81581	6.56709	41.3263	14.8317	9.27374	20.2339	19.5393	9.07309	5.57106	11.6653	30.8255	32.8361	22.2461	16.6575	44.7159	28.04
assembly10087_452bp	22.9882	17.0132	26.8103	40.7926	25.1399	27.379	40.8318	12.7932	18.9122	39.4119	27.3423	61.8004	21.9536	33.0544	31.7634	27.5988	25.1388	27.9249
assembly10088_781bp	79.5478	52.196	50.5988	64.5186	106.117	72.65	43.7657	93.3556	46.6677	95.8498	61.9341	66.2302	71.7616	85.4988	45.3884	90.7937	57.736	49.9156
assembly10089_332bp	7.26049	3.59274	5.4488	23.5654	8.26636	9.51596	19.7408	4.89247	9.29106	13.8464	8.05234	6.01057	8.29803	16.6819	13.1891	2.79308	1.6635	12.8399
assembly1008_1008bp	0.101024	0.191025	0.922692	0.433127	0.100123	0.590594	0.738979	0	0.203818	0	0.64639	0.10429	0.496101	0	0.279166	0.115513	0.25873	0.0953079
assembly10090_572bp	1.78252	0.147788	12.8864	16.7185	24.7859	3.00784	5.32345	11.563	1.55211	10.925	3.92287	7.31881	2.9603	11.0681	0.00290315	7.42955	3.02552	5.03606
assembly10091_470bp	12.2873	11.0064	8.13546	15.1522	4.67047	17.2991	6.04207	18.3324	6.76931	8.51717	23.2848	12.6778	23.3885	14.3645	5.88405	12.6943	7.13383	9.49224
assembly10092_365bp	17.7952	33.2345	18.4219	37.9992	35.0733	33.2194	4.71211	9.52646	9.79908	25.1608	4.74063	15.9226	12.5654	13.7599	27.9334	17.7493	14.996	33.4341
assembly10093_2074bp	0	0.0922248	0.731945	0.125144	0	0.144085	0.181974	0	0.099835	0	0.50048	0	0.109023	0	0.0868981	0	0.303491	0
assembly10094_1958bp	0	0.478417	0.359296	0.391835	0	0.400298	0.276944	0	0.0512275	0	0.259804	0.0523043	0.0480013	0	0.0908328	0	0.448394	0.238358
assembly10095_905bp	0.151326	1.31781	1.03442	0.923438	0.148695	0.346892	0.328207	0	1.08093	0	0.781325	0	0.13732	0	0.307924	0	0.906416	0
assembly10096_1298bp	0.347179	0.355506	0.527109	1.02036e-09	0.138383	0.151836	0.766924	0.353997	0.313633	0.207302	0.755813	0.154657	0.11791	0.293883	0.0474211	0.69986	0.26219	0.297985
assembly10097_2412bp	0.700806	0.302812	0.840147	0.56067	0.814113	0.570792	0.845484	1.07576	0.927419	0.74087	0.638898	0.583936	0.503247	1.00824	0.322542	1.26373	0.768271	0.534851
assembly10098_2516bp	0.113377	1.16164	0.742341	0.709316	0.113015	0.937036	1.21588	0.0291085	0.252298	0.0341887	0.992008	0.209251	0.365114	0.197333	0.331795	0.0857821	1.11381	0.48102
assembly10099_695bp	0	0.281349	0.297449	0	0	0.298968	0	0	0.302698	0	0.661803	0	0	0	0	0	0	0
assembly1009_2309bp	0	0	0.118543	0.101527	0	0.0582677	1.1078	0	0	0.0471003	0.464263	0	0.18601	0	0.102243	0	0.313004	0.0588759
assembly100_326bp	0	0	0	0	0	0	0	0	0	0	0	0	0	0	0	0	0	0
assembly10100_2388bp	0	0.127395	0.338016	0.00141158	0	0.18162	4.82468e-18	0	0.0208872	0.0217047	0.309438	0	0.0663289	0	0.0238534	0	0.278271	0.0543955
assembly10101_2787bp	0	0.445808	0.426415	0.110476	0.0389071	0.395251	0.0855038	0.0908093	0.133414	1.20781e-37	0.412483	0.259962	0.147651	0.0407889	0.113531	0.0676295	0.180886	0.0838526
assembly10102_2532bp	0	0.722617	1.36418	0.37229	0.0386217	0.68643	0.861643	0.0300172	0.0440635	8.5426e-27	0.738299	0.0435425	0.341648	0.245633	0.0439574	0.0224673	0.600885	0.252268
assembly10103_2494bp	0	0.640531	0.71985	0.181701	0	0.141908	0.589603	0	0.142121	0.020996	0.110873	0	0.0607959	0	0.0229904	0	0.237829	0.0524808
assembly10104_997bp	0	0.417353	4.82932e-20	6.16239e-20	0	1.26198	1.97753e-18	0	0.373762	4.21978e-11	0.829908	0	5.28566e-19	4.95508e-21	0.288253	0	3.67631e-07	0
assembly10105_2444bp	0	0.64558	0.907617	0.437377	0.205059	0.644418	0.668337	0.0320471	0.281277	0	0.553689	0.0461657	0.10806	0	0.0404404	0	0.756448	0.179622
assembly10106_2627bp	0.0818338	0.462075	0.796691	0.273857	0.0806175	0.615253	0.900624	0.0628191	0.0920238	0.111401	0.551579	0.0908709	0.130111	0.210726	0.079324	0	0.629562	0.043795
assembly10107_3127bp	0.247449	0.519823	0.823319	0.34395	0.600949	0.86943	0.290772	0.349502	0.446064	0.192825	0.914565	0.362087	0.377054	0.259303	0.379942	0.501115	0.310924	0.230298
assembly10108_400bp	21.1806	17.2369	9.93399	14.0556	24.3806	24.965	6.74128	21.8013	10.6566	27.2834	16.3557	8.87461	26.597	19.7331	31.0192	28.9916	26.4225	20.6191
assembly10109_1340bp	30.1567	30.2688	28.6503	27.1141	36.3396	24.6458	23.476	29.6629	27.7561	32.4172	28.8747	28.1646	20.5815	28.155	29.1834	26.7198	25.6844	27.985
assembly1010_352bp	0	0	0	1.23157	0	1.40718	0	0	0	0	0	0	0	0	0	0	0	0
assembly10110_1514bp	0	0.0756788	0.152825	6.13619e-31	0	0.00021011	0.146398	0	4.91922e-10	0	0.0427372	0	0.359136	2.06458e-40	0.143374	0.0427999	0.264381	0
assembly10111_3044bp	0	0.778873	0.827943	0.20339	1.87563e-21	0.416083	1.03835	2.41554e-07	0.145426	0	0.381133	0.0468478	0.119074	1.90255e-21	0.0405636	0.0228159	0.473605	0.0668628
assembly10112_4423bp	7.37743e-15	0.480719	1.12149	0.359179	0.0958728	0.162639	0.222989	1.48371e-07	0.353172	0.0218364	0.712933	0.0803925	0.185835	0.124743	0.0269774	0.0112108	0.385626	0.0686881
assembly10113_3097bp	0.0388121	0.741396	1.65002	0.770362	1.94367e-05	1.39596	0.5538	0.029666	1.30942e-15	2.32203e-14	0.854406	0.684195	0.218085	7.69113e-10	0.189194	0.0042006	1.37278	0.268812
assembly10114_3856bp	0.186257	1.16562	2.30169	0.685583	0.127511	0.769816	1.20922	0.136503	0.39012	0.115596	1.36229	0.0585808	0.228566	0.297217	0.657991	0.132643	1.26855	0.144247
assembly10115_5477bp	0.0088964	0.893983	2.05919	0.49185	0.0268224	0.49973	1.41475	0.0276295	0.0573963	0.032347	0.518431	0.134024	0.15113	0.00938716	0.164962	0.0204292	1.24654	0.0880477
assembly10116_5521bp	0.00882273	0.772679	0.620661	0.0745439	0.0262881	0.793656	0.0276571	0.0268843	0.28694	0.0314573	0.998662	0.126284	0.228068	0.00931267	0.132381	0.0199717	0.525658	0.358883
assembly10117_4190bp	0.0254991	0.700612	1.51271	0.354116	0	1.12808	1.46194	0.019149	0.389136	0.0455227	1.08534	0.326602	1.194	0.186686	0.841584	0.014315	1.99552	0.234783
assembly10118_3828bp	1.74374	7.62143	12.1666	5.2991	3.46744	8.30381	8.67994	1.94779	5.04909	3.11664	9.32665	3.79104	3.41754	2.53221	4.57179	4.47363	10.1898	5.58513
assembly10119_3061bp	21.0323	11.8947	8.37736	16.9634	25.556	14.1214	13.0323	18.2543	16.4992	20.0097	12.3253	17.4579	15.6439	19.2352	18.3054	18.7627	10.7016	17.4037
assembly1011_482bp	0	0	0	0	0	0	0	0	0	0	0	0	0	0	0	0	0	0
assembly10120_1052bp	17.7222	17.1697	13.7748	15.2325	25.1657	12.4974	21.2811	18.5704	14.3493	25.709	19.0751	17.6757	15.191	17.7765	19.3884	22.0868	15.7844	11.955
assembly10121_4044bp	0.0481289	1.10234	9.91722	0.289173	0.00401554	3.60669	1.85832	0.0098264	0.0950587	0.00826709	5.31937	0.230128	0.119314	0.0302299	0.452187	0.33624	5.12734	0.0612624
assembly10122_3943bp	11.3111	12.1139	7.27978	14.0008	17.0672	12.4472	12.8915	16.4134	11.1452	10.5983	9.97741	10.6858	11.6529	15.9956	9.9424	12.3611	7.77266	14.2386
assembly10123_2191bp	2.91885e-11	0.239249	0.376253	4.09091e-21	0.218434	0.629313	0.28748	0.085028	0.337401	0	0.695262	0.256285	0.344299	2.53542e-41	0.383386	0.114419	0.683529	0.263903
assembly10124_2765bp	0	0	0.0875366	1.56382e-11	0.00974972	0.193049	2.41122e-13	1.45789e-10	1.0853e-17	4.78295e-05	0.00280454	1.04262e-05	1.3937e-19	0	0.000108827	0	1.97508e-15	0.00011196
assembly10125_439bp	1.91402e-18	7.70277e-49	2.29999e-49	0	2.71272e-59	6.19642e-27	1.97183e-26	8.20026e-16	0	0	0	0	3.6249e-45	2.37772e-21	0	0	5.53858e-57	0
assembly10126_2455bp	0	0	0.100738	0.0467726	0.0114263	0.162496	0.202624	1.12528e-21	8.30219e-19	4.06448e-41	3.24431e-06	0.254204	4.40121e-09	0	8.6747e-05	0	0.938848	0.0058243
assembly10127_493bp	0	0.470448	0.0661419	0	0	6.86722e-42	1.6765e-82	0.302831	4.53385e-18	0	0.000351273	0.000395048	8.37394e-06	0	0	0	2.29982e-81	2.10862e-25
assembly10128_2167bp	2.98844e-11	1.2102	1.04165	0.222816	8.40272e-06	0.762246	0.589579	0.175407	0.397361	0.0513537	0.600149	0.0647878	0.100243	0.173604	0.449345	0.000138983	0.630945	0.396905
assembly10129_1555bp	0	0.0880267	4.54568e-05	0.0428219	0.019862	1.0832e-17	2.95892e-13	1.9804e-21	0.0978726	0	1.11032e-08	0.379522	0.0733943	0	3.78218e-19	0	1.72062e-11	0.00116157
assembly1012_1376bp	116.508	130.128	123.21	122.972	112.559	110.28	177.873	141.932	154.148	135.539	138.959	172.189	211.467	160.046	230.57	128.098	148.269	153.23
assembly10130_2478bp	0	0.966576	1.46178	0.57811	0.0107154	0.898825	0.634502	0.0624772	0.546985	0.0788662	1.04804	0.000230203	0.230351	0	0.0853626	0	0.454502	0.001056
assembly10131_1267bp	0.225435	0.503941	1.19507	0.229739	5.16832e-11	1.14968	1.57161	0.00986713	6.88306e-18	0.101455	0.296016	1.80559e-51	0.204743	5.2573e-41	3.76386e-16	0.023934	6.86676e-23	0.549489
assembly10132_2017bp	0	0.0601442	0.643358	0.112685	0	0.129275	0.241466	0	0.0673791	0.157108	1.13102	0	0	0	0	0.0333809	0.449631	0.193026
assembly10133_3636bp	0.0179628	0.039164	0.70391	0.203136	0.0178325	0.0995563	0.562134	6.02008e-20	0.344337	0.0163277	0.825023	1.36843e-20	1.88476e-05	0	0.0262256	6.24305e-07	0.42537	9.56206e-19
assembly10134_6879bp	0.00821493	0.53821	0.84336	0.247956	0.00824361	0.472093	0.372704	0.0376206	0.0572783	0.00748036	0.371754	0.150699	0.131837	0	0.296169	0.0279122	0.526161	0.201432
assembly10135_2940bp	0.158517	2.10901	5.05131	1.04022	0.158795	2.93229	2.66965	0.0310723	0.667678	0.0734836	2.01225	0.0444422	0.74823	0.0412083	0.206393	3.64004e-13	1.5645	0.359722
assembly10136_2913bp	1.9052e-09	2.34156	2.73781	0.156918	4.32173e-13	0.86116	1.91593	0.0299087	0.363614	0.0694515	2.56999	0.816843	0.63289	0.0395788	0.963984	0.0664965	1.70958	0.485999
assembly10137_563bp	0	0.585539	6.62221	0.708728	0	1.00965	0.0107643	0	2.56136	0	5.34923e-46	6.27537e-11	0.00184351	0	1.63346	0	3.4927e-18	0.609448
assembly10138_4248bp	37.425	37.3431	35.9701	14.993	6.65584	24.2241	29.6599	35.5763	28.3246	24.7503	31.9328	27.921	23.3301	19.0315	17.7685	27.9355	24.6618	14.9752
assembly10139_3499bp	31.3167	44.7599	43.3813	22.7972	8.87603	23.6159	30.0174	35.4412	27.0807	28.4059	26.8381	27.5027	30.0052	16.9853	23.8258	28.4107	25.1672	16.5368
assembly1013_2583bp	65.7064	68.9419	64.6298	59.3995	54.9548	60.4184	67.5106	59.8391	60.1743	55.9023	70.0313	69.8385	57.2413	53.0284	67.4738	64.0574	61.3515	59.7624
assembly10140_2332bp	0	1.25505	3.60745	0.651477	0	1.84342	0.42216	2.32381e-23	0.307546	0.0228877	1.65004	0.00013655	0.312833	0.0527592	0.796763	0.014414	1.32058	0.168257
assembly10141_2984bp	0.078488	1.80483	1.71236	0.151334	0.0393709	0.548621	2.15826	0.149283	0.921253	0.0176981	1.54174	0.527498	0.896517	0.0820654	0.349199	0.0111303	2.03119	0.784895
assembly10142_621bp	0	6.02916e-09	0.481936	0	0	0.244592	1.18224e-14	0	1.47726e-34	0	1.06631	1.23766e-27	1.03902e-93	0	0	0	0.431532	1.3526e-76
assembly10143_497bp	0	0.360649	0	0	0.679915	0.769382	0	0	0	0.311489	0	0.401588	0	0	0	0.206176	0	0
assembly10144_4940bp	0.126931	0.333796	0.496232	0.0444357	0.042432	0.076059	0.232131	0.0665928	0.182914	0.116414	0.303165	0.0753632	0.0194633	0.0865804	0.0435545	0.0495772	0.155496	0.101944
assembly10145_1151bp	0	0.0828097	0	0	2.51124e-14	0	0	0	0	0	0	0	0	0	0	0	1.25544e-11	0
assembly10146_450bp	1.25732e-07	0	0	0	0.489737	0	0	0	0	3.6323e-21	0	0	0	1.03133	0	0.909283	0	0
assembly10147_3696bp	0.315448	0.0793298	0.53488	0.148274	0.221427	0.281651	0.538531	0.196506	0.171865	0.230477	0.368204	0.168617	0.0656053	0.244346	0.147517	0.205535	0.185539	0.124318
assembly10148_2827bp	0.0492572	0.225571	0.0580703	0.157874	0.155391	0.14134	0.000164387	0	0.123048	0.0465273	0.0651131	0.0596174	0.0464557	0.0684273	0.0519585	6.49002e-16	6.49396e-31	3.2958e-20
assembly10149_2774bp	0	0	0.0338512	0.0289151	0.0637084	0.0987128	0	0	0	0	0	0	0	0	0	0	0.0862797	0
assembly1014_638bp	1.77205	2.96205	0.557533	1.99085	0.257142	0.843232	0	0.201828	0.581327	0.467803	0.924015	0	0.453739	0	0	0.890945	0.248791	0
assembly10150_1077bp	0	0	0.16568	0	0	0	0.303044	0	0	0	0	0	0	0.15498	0	0.254809	0	0
assembly10151_305bp	0	0	0	0	0	0	0	0	0	0	0	0	1.48146e-51	0	0	0	0	0
assembly10152_340bp	1.09688	5.14451	2.55914	2.29616	0.983155	1.29719	0	5.15072	3.91848	0.980795	1.38265	4.0229	4.81952	6.80456	2.22699	4.64997	4.60359	0
assembly10153_328bp	11.7453	25.0038	17.0092	3.72247	14.0213	11.961	22.7523	11.4038	22.4384	3.40915	6.43054	4.68552	10.9861	11.9798	6.27688	7.47811	3.52281	19.4254
assembly10154_3469bp	8.32707	2.79335	3.29873	4.18875	8.71688	5.42149	4.83659	4.90757	3.84061	7.81529	6.45077	6.71363	2.97769	4.10208	3.99937	7.01314	6.10845	9.20232
assembly10155_3698bp	10.9272	10.4404	12.1618	15.9893	18.4785	14.5266	11.8802	16.4103	13.7535	14.9771	10.8011	10.2368	12.9489	18.9969	15.5206	16.8855	14.5535	12.7601
assembly10156_4009bp	17.7981	16.9714	18.5102	17.7105	22.5813	14.1381	16.3647	16.8994	13.753	16.236	19.1714	17.9382	17.0822	17.4509	16.4251	18.5575	14.938	17.9858
assembly10157_1129bp	0.0335034	0.704118	1.03927	6.4872e-21	0	0.481417	4.70053e-18	0	0.639847	0	0.611819	0	0.0536261	0	3.87308e-23	0	0	0
assembly10158_667bp	0	0.289973	1.26964e-21	0	0	1.01076e-20	0	0	6.9084e-22	0	0	0	0	0	0	0	0	0
assembly10159_1344bp	0.0283358	0.237121	3.25052e-07	0.0137103	0	0.00947997	0.430224	0	0.0833069	0	0.958929	0	3.84464e-23	0	4.1613e-25	0	0	0
assembly1015_1936bp	5.73952	5.36253	5.13347	15.5639	26.5964	8.23006	6.9616	13.744	3.12052	4.45107	4.26361	3.94404	2.92874	6.38034	1.62094	4.08106	5.93258	3.49913
assembly10160_1591bp	0.0227191	2.47793e-20	0.747447	0.000294759	0	0.243959	0.0055095	0	0.0039484	0	0.0140353	0.161784	0.107969	0	4.7027e-05	0	0	0.102685
assembly10161_691bp	5.95177e-07	5.94228e-07	1.10237	0	0	1.16244	2.06815e-24	0	2.22453e-08	0	4.46743e-33	0	2.47606e-27	0	0	0	0.276728	0
assembly10162_1681bp	0.0217374	0.0913846	0.682451	0.408641	0	1.30481	0.189104	0	0.00338569	0	0.0104083	0.141327	0.0924881	0	0.419445	0	0.673839	0.0917367
assembly10163_514bp	0	0.199621	0.631382	0	0	0	1.14837	0	0	0	0.936075	0.442231	0	0	0.188283	0	0	0
assembly10164_2916bp	0.0391774	1.4826	1.89631	0.515453	0.0199723	1.77289	0.24909	0	2.80807e-20	0.0182128	0.854116	0.0918485	0.229189	0.0208676	0.522398	0	0.389068	0.0892622
assembly10165_2913bp	0	0.186261	1.19717	0.13826	0	1.08325	1.46852	0	0.461365	0	0.472738	0.555142	0.513689	0	0.26227	0	1.37695	0.29655
assembly10166_2921bp	0.0418241	0.631156	1.26841	0.547627	0.0206264	0.0429354	0.347728	0	0.0489788	0.0188002	0.50342	0.19288	0.025729	0.0215243	3.33355e-07	0	0.181622	0.0470826
assembly10167_1756bp	0.0849006	2.34402	3.40184	0.0872263	0	0.646156	0.184094	0	0.412531	0	2.89152	0.100052	1.25798e-07	0	0.0860501	0	0.670874	0.393788
assembly10168_3460bp	45.2971	35.9571	38.3543	39.9144	57.2697	42.2645	41.1802	45.0745	38.9188	51.5542	45.4009	35.7854	31.0585	44.114	36.0416	45.8469	33.1769	38.2443
assembly10169_3427bp	39.4589	36.7123	32.6601	38.3798	43.7314	34.6196	31.4205	37.0744	35.3606	35.8449	34.4611	35.3364	28.5859	40.4052	29.7633	41.2538	35.6794	28.3923
assembly1016_979bp	0	17.0901	23.2484	7.66385	0	17.5761	13.5863	0.111432	10.9804	0	17.3919	4.82712	16.429	0.293185	7.89064	0.0823991	18.4874	7.4143
assembly10170_379bp	11.1461	7.40733	6.81565	5.99777	9.84848	7.33264	8.14654	8.49332	4.15367	7.69677	11.6313	4.90982	5.96749	13.9128	5.06973	11.8951	5.69724	2.39314
assembly10171_356bp	0	0	1.3029	0	0	0	3.46794	0	0	0	0	0	0	0	0	0	0	0
assembly10172_798bp	0	0.590309	2.50379	0.8799	0.187109	0.408494	0	0	0.627187	0	0.692835	0.211415	0.663939	0	0	0	0.734492	0
assembly10173_2410bp	0.00904771	0.803756	2.78658	1.16952	7.49694e-05	2.07467	1.225	0.352755	0.149237	0.124934	2.11433	0.107303	0.376861	4.41552e-06	0.707594	0.0530409	1.82404	0.539704
assembly10174_2461bp	0.0824305	3.4136	3.57649	1.28744	0.131568	0.695434	2.88051	0.06876	0.849544	2.7541e-21	1.73159	0.633329	0.580572	0.0929969	0.184702	0.156087	2.15264	0.480579
assembly10175_1740bp	0	0.555393	0.0107857	0.0475036	0	0.000254408	0.297738	0	0.190112	0	0.0551097	0	0.0611743	0	0.848606	0	4.66503e-21	0.163703
assembly10176_775bp	0	1.55938e-21	6.87438e-07	0	0	9.51593e-36	3.90295e-26	0	2.6246e-40	0	0	0	1.22086e-60	0	0.855974	0	1.33749e-26	0
assembly10177_1606bp	0	0.0838377	0.748856	0.0540429	0	0.0871113	0.802443	0	0.244672	0	0.0601611	3.82675e-06	0.0759458	0	0	0	0.537909	1.19161e-23
assembly10178_500bp	8.25728	5.12858	5.7019	5.04226	2.99771	3.59767	7.79568	8.567	7.96766	6.96981	9.89416	9.36989	16.8482	8.03352	18.5001	8.64017	4.87844	9.36736
assembly10179_1847bp	0	0.127642	0.00832381	0.0436462	0	0.000234366	8.84808e-11	0	2.51267e-22	0	0.0521263	0	0.0531932	0	0	0	2.06833e-22	0.148098
assembly1017_1447bp	0	2.0199	2.43731	0.140857	0	0.728057	1.94177	0	1.07562	0.0685373	2.8554	0.833781	0.51687	0	0.71612	0.0433263	1.70893	0.15797
assembly10180_3320bp	35.5399	35.8361	35.0817	39.5044	36.5027	39.2243	32.8242	36.3332	29.8439	35.1971	35.9644	31.8759	31.3232	41.6148	37.5336	40.2027	31.3332	36.7277
assembly10181_1112bp	0.558874	0.484499	0.757829	0.795313	0.96794	0.257193	0	1.03157	0.26724	0.703579	0.137432	0.386655	0.49728	1.39423	0.221252	0.906057	0.336912	0.258994
assembly10182_1383bp	0.498006	0.84155	0.80688	0.798687	0.617633	0.730484	0.150982	0.427917	0.339244	0.618797	0	0.1636	0.503809	0.657142	0.213405	0.563381	0.356009	0.580124
assembly10183_2943bp	87.9055	87.0625	100.973	95.5918	118.664	85.0932	95.2067	94.3641	89.0759	86.7567	97.5077	83.3565	87.0943	89.2865	99.4461	83.7175	101.689	96.2124
assembly10184_599bp	7.90139	13.2609	10.4096	15.1797	14.1146	13.4956	13.121	9.79811	15.0122	11.0151	13.9697	13.8321	13.431	12.4699	19.0952	14.7274	15.6793	16.8503
assembly10185_884bp	55.252	65.6182	48.6845	57.6872	53.0042	57.0703	60.2852	58.4467	48.5049	43.8097	63.737	61.8819	56.5206	53.7355	56.7345	54.8862	54.5145	46.1414
assembly10186_459bp	0	0	0	0	0	0	0	0	0	0	0	0	0	0	0	0	0	0
assembly10187_3138bp	8.93473	7.79731	7.89922	8.94577	8.53424	9.12341	11.2879	8.39976	10.7838	7.41812	10.6391	7.69984	8.60027	9.55769	7.35646	10.6463	9.4484	9.1907
assembly10188_4169bp	23.0944	26.6454	25.9846	23.6619	22.0786	23.3287	21.626	25.777	23.8656	23.8585	24.9996	23.289	28.5386	22.2702	30.0451	26.1225	25.0368	28.0378
assembly10189_816bp	0.84697	0.667447	1.63396	0.632117	4.76006e-10	2.07881	0.134789	1.87592	0.492697	0.787578	1.03783	0.347725	1.34587	0.000857348	0.0115411	0.12682	1.86704	0.233093
assembly1018_2311bp	43.9156	32.4467	32.8882	25.0895	19.8195	29.9144	30.9165	27.6639	30.4419	36.6738	30.968	32.3451	21.5814	20.629	19.0896	33.1859	20.8729	25.5126
assembly10190_7145bp	0.832887	0.918403	0.83019	0.871803	0.531143	0.966836	0.66001	0.832493	0.564587	0.500775	0.390878	0.226691	0.436013	1.05727	0.439891	0.948519	0.865896	0.319792
assembly10191_303bp	0	3.3089e-11	3.38465e-18	0	0	3.60094	0	0	2.49616e-22	0	0.00315676	2.48572e-42	5.64442e-20	0	0	0	0	0
assembly10192_839bp	0	0.705524	1.47239	0	0	0.973838	1.38955	0	0	0	0.548937	0.5257	0.191245	0	0	0	0.025602	3.4601e-08
assembly10193_340bp	0	0	0.560222	0	0	0	1.93249	0	0	0	0	1.23878	0	0	0	0	0	0.560233
assembly10194_528bp	0	0.322353	2.74309	0.297643	0	0.340694	0.633096	0	0.670194	0	0.0163029	0.714108	6.65476e-33	0	0.314726	0	0.314128	0.000145796
assembly10195_321bp	0	5.45452	5.78506	2.07127	1.00517	2.33021	2.15031	0	0	0	2.52095	0	0.946024	0	1.10369	0	5.34431	0
assembly10196_605bp	0	1.4372	0.607679	0.267477	0	1.06404	0	0	0.347341	0	1.65817	1.26189	0.253889	0	0.277878	0	3.35859	0.299939
assembly10197_337bp	0	0.526891	1.10896	0.997796	0	1.67287	0	0	0	0	1.21397	0	0.45218	0	0.533353	0	0	1.63992
assembly10198_387bp	0	0	2.34476	0.67673	0	0.760206	0	0	0	0	0.844518	0.422262	0.6327	0	1.10113	0	1.77894	0
assembly10199_359bp	0	1.65774	3.50985	0.777914	0	7.78563	6.34115	0	0	0	6.67967	0.978503	1.39536	0	0	0	0.765003	3.01297e-08
assembly1019_782bp	132.106	151.807	147.132	218.916	185.726	167.005	120.299	92.9445	135.219	133.232	179.539	195.102	119.605	93.9318	152.323	94.2219	121.406	155.091
assembly101_699bp	0	0	0.240116	0	0	0.238411	0	0	0	0	0	0	0	0	0	0	0	0
assembly10200_362bp	0	0	3.74759e-21	0	0	0	0	0	0	0	4.33451e-23	0	0	0	0	0	0.61297	2.35286
assembly10201_625bp	0	0.126288	0	0	0	1.24479e-21	0.243604	0	0	0	3.93117e-39	0	0	0	9.42542e-24	0	2.93276e-19	0
assembly10202_564bp	0	0.147548	0.626406	0	0	1.25713	0.283719	0	0	0	4.60182e-39	0	0.499088	0	0.421399	0	0.273999	0
assembly10203_609bp	0	4.15347e-22	0.262597	0	0	4.5855e-34	1.572e-05	0	0.269362	0	0.857834	0	0	0	0.115833	0	0.916691	0.254702
assembly10204_620bp	0	0.362845	0	0	0	1.49757	0.00247168	0	1.74071	0	0	0.360812	0.304843	0	0	0	5.0883e-20	0
assembly10205_362bp	0	0	1.84282	0	0	1.81919	1.65825	0	0.508867	0	0	0.0464819	0	0	0	0	0	0
assembly10206_461bp	0	7.07125e-20	0.473311	0.416267	0	5.35725e-23	4.07085e-29	0	0	0	1.02329	0	0.723498	0	0.809863	0	5.0082e-22	0
assembly10207_1328bp	0	0.248224	0.857539	2.14491e-10	0	0.0171487	0.00787245	0	5.78406e-05	0	5.34931e-05	0.072777	0.00945923	0	0	0	1.48094e-05	4.56552e-13
assembly10208_1305bp	0	0.44037	0.289946	7.37878e-15	0	0.0587289	0.445605	0	0.000939069	0	0.700089	0.00333365	8.68419e-17	0	0	0	1.64266	8.83471e-06
assembly10209_1542bp	0	0.00942566	0.175141	0.572225	0	0.124612	0.00730826	0	0.00015534	0	0.516782	0.0025642	0.183396	0	0	0	0.164976	2.05299e-06
assembly1020_346bp	0	1.3961	0	0	0	0	0	0	1.52347	0	0	0	0	0	0	0	1.34619	0
assembly10210_1084bp	0	6.36077e-23	1.06979	3.05163e-10	0	4.7637e-13	0.0104519	0	0.551104	0	0.689828	0.00371088	0.000926935	0	0	0	0.456948	0.075791
assembly10211_1283bp	0	0.486726	0.361831	4.81471e-14	0	1.44798	0.00980863	0	0.0496678	0	0.848113	0.00340315	9.09431e-17	0	0	0	0.00052702	9.34472e-06
assembly10212_1350bp	0	0.00758326	0.000840929	6.49156e-22	0	9.78346e-14	0.00772735	0	5.47377e-05	0	4.06955e-08	0.0697456	0.00908459	0	0	0	1.24497e-22	4.48575e-13
assembly10213_1106bp	0	6.15597e-23	0.00135551	8.41504e-22	0	0.151717	0.0102	0	0.507553	0	0.369059	0.00362445	0.00087939	0	0	0	3.35747e-18	0.0715994
assembly10214_1757bp	0	0.00646676	0.0990506	3.26729e-13	0.0914907	2.0352e-10	0.00650283	0	0.00011561	0	0.125184	0.00228217	0.127985	0	0	0	1.18904e-18	1.57493e-06
assembly10215_1191bp	0	5.26056e-23	0.00395616	2.42443e-10	0	1.86527e-13	0.0091009	0	3.60005e-19	0	1.10082e-05	0.00324156	0.013535	0	0	0	2.99393e-05	5.28165e-13
assembly10216_1221bp	0	0.400255	0.288264	2.61622e-10	0	0.0408373	0.00886762	0	0.00167769	0	0.532328	0.0911902	0.000670974	0	0	0	7.94742e-05	0.50685
assembly10217_618bp	0	1.20364	0.695238	0.693602	0	2.73277e-09	0.744467	0	2.60045e-20	0	1.7836	0	0.12025	0	0.358322	0	1.00103	0.261005
assembly10218_732bp	0	1.2915	2.03156	8.54328e-09	0	1.34264	0.59281	0	1.70398	0	1.05722	0	4.51687e-05	0	0.258161	0	1.0164	0.110769
assembly10219_413bp	0	8.29454e-18	0.3692	6.28254e-11	0	8.67295e-23	2.22629e-16	0	0	0	7.99998e-16	0	0.574574	0	1.75474e-25	0	0.00813396	0
assembly1021_1785bp	44.3478	47.1556	49.7716	58.9489	55.9926	68.0491	48.7474	69.4798	57.773	40.6902	41.2787	43.4162	87.3912	66.2429	65.5247	51.8218	54.2254	50.8395
assembly10220_520bp	0	1.80041	2.24326	0.910204	0	1.04402	0.92506	0	0	0	5.04867	0	0.178792	0	0.00100354	0	3.54276	0
assembly10221_339bp	0	1.23225	0	0	0	1.84965e-16	4.58017	0	0	0	1.36699	0	0	0	1.20288	0.736546	6.64756e-19	0
assembly10222_2762bp	24.6716	24.7706	23.8615	18.3329	16.1648	19.4241	27.5615	25.0913	22.5157	23.6465	26.9691	22.9864	30.6836	24.9575	27.1895	26.6411	19.9837	24.2275
assembly10223_851bp	12.6608	16.7397	21.4961	35.301	25.7582	29.3814	25.5871	21.0471	14.8264	20.3475	27.5795	25.5301	26.0089	17.0134	25.7224	20.0091	18.1502	27.5793
assembly10224_3332bp	146.745	124.873	119.222	166.151	158.326	152.95	130.413	118.084	131.831	123.543	121.834	117.793	101.09	137.302	113.947	130.95	105.453	124.137
assembly10225_727bp	0	1.5557	0	0	0	0	0	0	0	0	0.626643	0	0.434576	0	0.485882	0	0.98012	0
assembly10226_2349bp	0	3.3541	4.25919	1.08837	0	1.96382	1.89275	0.0333501	2.06745	0.0397703	2.95825	0.399207	0.90595	0.180462	0.978464	0.0251529	2.52378	0.432418
assembly10227_647bp	0.156161	0.638322	1.70072	0.145381	0	0.166417	0.620284	0.117898	0.175307	0.137776	0.564671	0	0	0.160068	0.149516	0.0900408	0.591993	0.169137
assembly10228_898bp	0	2.29275	6.91244	0.478088	0	0.965568	2.67864	0.12192	1.33072	0	2.63155	9.20491e-05	2.03219	0.330818	1.12137	0.0910956	2.74254	3.39117e-05
assembly10229_1744bp	0	8.77949	14.608	3.10564	0.0627065	5.28642	6.36271	0.144103	4.18611	0.171937	9.87723	1.48448	3.25969	0.261735	2.68191	0.0361204	7.42688	2.11045
assembly1022_2614bp	43.4255	39.3965	39.755	57.8465	63.0626	58.266	52.672	49.5131	44.5174	37.4932	42.7118	39.594	48.3549	64.0049	37.9356	46.7398	55.2192	70.8066
assembly10230_821bp	0	0	0.176666	0	0	0	0	0	0.529831	0	0	0	0.279064	0	0	0	0.31036	0
assembly10231_398bp	0	0.894508	0.635139	0.277434	7.2872e-26	0.943857	0	0	0.640112	0	0.698531	0.0789089	0	0	0.874549	0.181559	0.830812	0
assembly10232_1545bp	0	1.8227	1.57686	0.254359	0	1.8762	0.570728	0	0.107782	0.0797678	1.13339	2.03278e-08	0.240517	0.18306	0.181872	7.14736e-22	0.820876	0.418478
assembly10233_3213bp	0.0738518	0.790752	2.7456	0.868901	0.585253	1.34163	1.18681	0.0563254	0.310428	0.100667	1.68661	0.549204	0.503696	0.0764826	0.528266	0.0421516	1.63682	0.341173
assembly10234_905bp	0.678837	0.169498	1.27425	0.155763	0	0.705518	0.654766	0.408016	0.911405	0	0.586086	0.00029323	0.144663	0.359806	0	0.39685	1.10534	0.671017
assembly10235_714bp	130.452	121.384	121.111	150.946	180.677	113.073	126.218	142.279	145.782	96.4465	122.377	100.943	116.516	118.983	139.521	103.385	143.489	160.301
assembly10236_4233bp	67.4171	85.7876	85.25	104.075	100.879	95.071	86.0865	82.1634	102.37	67.5507	81.2527	74.7334	77.6983	79.3785	83.2279	72.7269	104.966	133.823
assembly10237_912bp	115.584	104.331	106.028	175.873	190.896	178.752	97.6816	101.808	137.11	102.043	110.646	147.234	101.958	111.336	135.944	120.228	153.993	184.506
assembly10238_429bp	9.22063	10.9655	10.6995	6.78817	18.5129	14.1353	4.08887	10.568	7.97887	15.0127	12.579	10.0867	6.8916	10.8688	4.08852	11.9045	11.5059	12.9455
assembly10239_474bp	19.3356	3.30399	25.9354	13.284	18.339	14.3877	35.5937	12.5269	6.24702	19.285	4.67446	18.1703	20.7157	11.8467	7.83109	32.8465	7.90181	7.42576
assembly1023_488bp	4.51614	0	2.36772	0	5.72963	0.801874	0	5.30868	0.82757	4.75231	3.45863	3.35051	0.62496	1.34069	3.53882	5.50603	1.43609	1.52781
assembly10240_2144bp	0	0.0155683	0.104701	0.0446596	0	0.210178	0.118122	0	0.10067	0.0281514	0	0.0168414	0	0	0	0	4.56599e-22	0.0160858
assembly10241_2319bp	0	0.0150579	0.0942263	0.0412784	0	0.159885	0.39786	0	6.39603e-13	0.0263192	0	0.016294	0	0	0	0	0.386691	0.0155605
assembly10242_2246bp	0	0.0149926	0.0920182	0.0410325	0	0.158566	0.106776	0	6.36369e-13	0.0261794	0	0.0162124	0	0	0	0	0.0380048	0.0154897
assembly10243_5364bp	5.02709	14.1657	9.857	7.35475	16.2734	18.579	17.1315	9.86756	8.3481	8.20442	17.4573	9.851	10.1543	13.3177	9.84079	13.9589	11.7152	16.1228
assembly10244_5545bp	20.1716	11.4858	12.9122	20.9928	13.0006	11.7602	5.52244	16.1639	14.9976	15.3076	7.0186	11.5236	14.571	14.7552	16.1096	15.0643	14.4464	11.1454
assembly10245_5145bp	21.8333	15.9914	15.8921	19.2918	24.7353	18.3206	16.8197	18.5292	15.6865	20.3835	18.0116	14.615	16.0032	20.2534	19.9784	20.4559	17.9335	21.9621
assembly10246_518bp	1.3321e-68	0.259741	0.253001	0.461024	0	0	0	4.65173e-79	0	0	4.96031e-55	0	0.210575	0	0.233233	0.130866	1.9688e-54	8.53456e-45
assembly10247_603bp	1.03787e-68	0.177616	0.195719	5.51653e-19	0	0	0	0	0	0	3.13355e-77	0	0.161164	0	0.178182	0.100235	3.66502e-51	2.09575e-38
assembly10248_3207bp	8.7473e-17	0.114979	0.617851	0.041978	0.0463249	5.10427e-06	0.069601	0.00835273	2.85284e-15	1.12291e-17	0.256004	2.09144e-11	0.000143802	0.0225326	0.106079	0.0535613	0.0326205	0.0453244
assembly10249_3280bp	0.065216	0.669178	0.466262	0.0305517	5.24525e-05	0.301709	0.830662	0.00820536	0.0771381	0.0291209	0.370799	1.59452e-12	0.136213	0.0216769	0.0262389	0.00271439	0.332934	0.364017
assembly1024_1668bp	0.104437	2.47597	3.58327	1.18653	0.423575	2.94584	2.88435	0.69051	1.05471	0.145146	2.48471	0.873957	0.930947	1.1741	0.843683	0.453551	2.17119	0.757243
assembly10250_3125bp	9.5776e-17	0.800974	2.17009	0.507245	0.0528645	1.3817	0.00147743	0.00871028	0.617514	1.17401e-17	0.652622	0.399446	0.355376	0.0246388	0.172921	8.77639e-09	1.27638	0.118422
assembly10251_933bp	0	1.02908	1.94569	0.673291	0	0.957931	0.592056	0	1.35581e-16	0	0.869302	0	0.624703	0	0.13928	0	0.817494	0
assembly10252_447bp	0	3.06361e-19	1.78679e-19	0	0	1.19587e-27	0	0	0	0	0	0	5.63306e-20	0	0.477513	0	0	0
assembly10253_686bp	0	6.91379e-23	2.90283e-23	1.57557e-07	0	7.31448e-17	0	0	0.693697	0	0.248021	0	2.03628e-20	0	5.69236e-17	0	4.11214e-24	0
assembly10254_506bp	0	0.336671	3.21874e-06	0.309674	0	0.344154	0	0	0	0	0	0	3.77762e-20	0	0	0	0	0
assembly10255_751bp	0	0.259713	0.225005	0.194093	0	5.52447e-12	0	0	1.9279e-11	0	0.963062	0	1.1976e-20	0	0.388351	0	0.0059115	0
assembly10256_668bp	0	1.14002	3.61866	0.349951	0	1.18823e-20	0.728837	0	0	0	0	0	1.75739e-20	0	0	0	0	0.388564
assembly10257_330bp	0	0	6.9311e-49	1.28777e-12	0	1.62007e-19	0	0	0	0	0	0	0	0	0	0	0	0
assembly10258_733bp	0	0	0	0	0	0	1.76687	0	0	0.488011	0.335699	0	0	0.563453	0	0	0	0
assembly10259_346bp	0	0.939396	0	0.879197	0	0	0	0	0	0	0	1.06701	0	0	0	0	0	0
assembly1025_397bp	3.18804	3.3402	0	0	8.06019	1.78716	3.08161	1.3699	0	2.89652	5.38398	0	1.48332	0	0	0	0	0
assembly10260_957bp	0.171454	1.15062	2.99401	0.18216	0	1.03017	0	0.134552	0.420903	0	1.78614	0	0.15655	0.178064	0.536457	0	0.720285	1.02465
assembly10261_1905bp	23.4055	25.2842	28.7335	41.4845	43.5642	37.1739	31.8737	26.4869	29.9931	27.4463	31.5848	32.0703	30.8462	25.8633	39.893	25.9221	32.6163	51.6261
assembly10262_1267bp	9.28616	8.56822	6.17656	6.87459	10.6717	8.75147	7.61897	6.62707	7.18566	5.67814	11.8095	9.49317	6.96373	8.0583	8.31333	7.514	7.56896	9.87465
assembly10263_2182bp	5.9324	11.9637	10.5515	9.69456	14.461	5.70073	9.87471	9.49757	7.58351	6.27843	9.15247	7.88788	7.49655	9.86158	6.93863	8.58585	7.99034	7.36738
assembly10264_4393bp	5.39844	3.367	1.31876	8.12289	16.2565	3.48669	4.57234	7.01802	4.53683	6.73471	7.0607	6.9269	6.33974	5.00253	7.82594	6.16022	4.59879	8.37503
assembly10265_4751bp	0.986745	3.74404	5.75242	2.35715	2.15899	2.61767	4.70209	1.186	1.86402	1.10808	1.87225	1.57475	1.2719	2.13412	1.91399	0.885299	3.08453	1.43105
assembly10266_2411bp	0	1.08602	1.96878	0.604308	0	1.10591	0.777734	0	0.271613	0.0410786	2.20082	0.426955	0.288406	0.0466845	0.368696	0	1.38746	0.519423
assembly10267_682bp	0	0.979115	0	0.620901	0	1.76463	1.92482	0	0.366673	0	4.15376	0.693542	0.537893	0	0.606167	0	0.307632	0.354083
assembly10268_2094bp	0	0.0565231	0.0596451	0.211494	0	0.538388	0	0	0	0	0.329251	0.122691	0	0	0.2091	0.0300598	0.158052	0.175187
assembly10269_1990bp	0	0	0.106236	0	0	6.91188e-26	0	0	0.0550928	0	0.235839	0	0	0.15295	0.188804	0.0284015	0.141782	0.0530064
assembly1026_438bp	27.9146	18.4228	13.0393	11.141	30.8093	9.91642	21.9049	21.2954	31.5587	14.1887	18.6695	19.5553	14.9429	15.3046	11.5423	15.1942	17.1538	15.1316
assembly10270_302bp	0	0	0	2.79414	0	0	0	3.93615	3.39556	0	0	0	5.92585	0	2.15154e-65	1.52092	0	0
assembly10271_1825bp	0	0.365991	0.321961	0.168979	0	0.325649	0.118274	0	1.08408e-66	0	0.16302	0.0664036	0.0507958	0.0615533	0	0	0.171287	0.0634949
assembly10272_884bp	0	3.75822e-11	0.563621	0.658462	0	0.753791	0	0	3.12087e-66	0	1.12157	9.74009e-66	0.000371355	0	0	0	2.10473e-22	0
assembly10273_1869bp	0	0.336139	0.564249	0.0613878	0	0.770887	0.514549	0	0	0	0.463389	0.146128	0.167372	0.135892	0.186659	0	0.505014	0.203325
assembly10274_2454bp	0.598384	1.24701	1.88428	0.486315	1.14141	0.663049	0.694033	0.359688	0.0561593	0.256966	1.19621	0.498264	0.167829	0.188421	0.474065	0.401426	0.815896	0.7069
assembly10275_1703bp	0.956945	2.08877	3.10499	2.18297	2.25313	2.32004	1.50587	2.70852	1.23066	1.8962	2.73412	0.933954	2.72857	1.42292	2.60429	1.296	2.40809	0.45219
assembly10276_552bp	0	0.440486	1.366	0.813027	1.84529e-22	3.19646e-49	0.409129	2.32052e-24	0	1.51316e-20	2.06551	0.24439	2.21314e-33	0	1.88743e-23	1.29915e-27	0.203438	0.221423
assembly10277_1735bp	4.4749	2.15378	6.33042	3.03386	6.02782	4.27955	4.18052	5.98927	3.70515	7.80186	4.36523	1.40038	3.7141	4.13766	5.39791	3.12991	3.81735	0.250825
assembly10278_1653bp	0.0590133	0.580303	0.128936	0.056375	0.0550707	0.131949	0.0233739	1.40242	0.00352924	0.0954736	0.000483516	3.74156	0.0631447	0.132364	0.0345456	0.614972	0.00595454	1.20644e-44
assembly10279_1844bp	0.133603	0.213949	0.671325	0.266027	0.276302	0.601491	0.272199	0.160096	0.231504	0.249192	0.165505	0.459528	0.296067	0.0699653	0.132148	0.156419	0.65826	0.290671
assembly1027_606bp	57.4127	60.0331	48.1268	48.0082	62.663	48.4642	58.0644	55.3043	50.9996	56.9377	74.9411	58.358	34.7166	51.3114	50.144	51.0205	40.7431	48.8963
assembly10280_1022bp	0	0.627253	0.650199	0.199995	0	1.13499	0	0	0	0	0	0	0	0.200327	0	0	2.11511e-17	0.651555
assembly10281_1329bp	0	1.05136e-18	8.95243e-21	0.384184	0	0.146418	0.261103	0	0.14873	0	0.470334	0	0	2.8757e-18	0	0	0.254976	1.69609e-19
assembly10282_602bp	0	0	0	0	0	0	0	0	0	0	0	0	0	0	0	0	0.28983	0
assembly10283_3966bp	0	0.989647	1.65907	0.433344	0.0576415	1.05549	0.788505	0.0882083	0.338565	0.0262143	0.975874	0.299125	0.206685	0.11953	0.144499	0.0492952	0.550316	0.226891
assembly10284_370bp	0	0	0	1.65644e-40	0	0	0	0	0	0	0	0	0	0	0	0	0	0
assembly10285_664bp	0	0	0.699636	8.74164e-85	0	0	0.659313	0	2.25116e-63	0	1.33228e-05	0	0	0	0.602925	0	1.05949e-56	4.81221e-100
assembly10286_2196bp	70.5414	54.7452	57.0536	50.6974	37.7795	64.6318	39.8062	63.0805	56.0062	75.1812	45.7848	55.7045	39.8388	58.3659	52.5771	62.2263	48.3296	43.2527
assembly10287_852bp	47.5721	43.4577	38.0006	42.3919	52.9867	46.9376	32.0793	39.029	31.446	39.3627	34.5387	29.3271	20.0022	41.5322	21.9787	43.1093	36.3977	33.6424
assembly10288_1881bp	53.9342	48.1575	44.1076	39.5922	61.2874	49.0818	41.2308	66.1689	44.365	55.5335	46.7912	46.4736	40.8815	59.7337	33.8706	56.3734	41.7023	34.1413
assembly10289_3094bp	84.4657	86.648	94.8994	108.355	81.8892	115.07	94.1891	75.4004	80.9725	71.1357	81.7948	73.6722	70.4396	72.791	62.98	79.6797	92.5666	86.5468
assembly1028_462bp	2.66581e-07	2.01944e-19	3.52056e-17	1.93776	1.73199e-10	2.1145e-11	2.28517e-06	0.229307	0.0293985	0.00333958	5.34994e-17	1.06493e-06	0	2.26292e-06	3.70849	4.78578e-06	1.65291e-05	7.63306e-15
assembly10290_3241bp	237.973	291.799	316.205	269.259	198.51	267.815	275.448	235.335	293.679	192.617	252.845	238.361	310.17	228.382	316.364	231.755	280.573	234.084
assembly10291_2240bp	87.2118	88.5211	83.4243	85.675	80.0573	87.2484	79.0765	87.2482	71.5401	87.8299	87.9027	83.4489	81.0224	84.0443	82.7994	87.6019	78.9569	78.4712
assembly10292_397bp	0	0	0	0	0	0	2.4814	0	0	0	0	0.70851	0	0	0	0	0	0
assembly10293_695bp	0	0.310918	0	0.291434	0	0	0	0	0	0	0.723007	0	0	0	0	0	0.291734	0
assembly10294_790bp	4.69507	7.05129	8.64685	10.5673	3.33365	12.6994	1.48698	8.70212	9.10589	3.96013	5.10614	4.51212	5.87313	20.0735	2.30276	13.8093	12.0192	3.56323
assembly10295_5491bp	4.50113	5.67591	5.59984	3.21005	0.920588	4.24476	4.71328	7.66307	4.58004	8.16768	4.54133	4.19739	2.85197	3.96982	1.44474	10.761	2.03908	1.55847
assembly10296_1437bp	35.6682	25.4792	27.2714	33.2122	35.2958	40.7442	26.8688	38.9731	31.3818	35.7632	24.3919	25.0868	24.1855	37.6083	28.0117	41.3308	26.8153	28.5072
assembly10297_500bp	0	0	1.76427	1.92377	0	2.20613	0.337358	0.321236	1.37913	0.363663	0	0.924185	0.355746	1.08304	0.790045	1.90934	1.55464	0.439245
assembly10298_1093bp	2.72759	2.92113	1.85498	1.55766	1.88715	3.96251	1.33439	3.4371	2.98375	4.35849	3.19765	2.55454	1.04512	1.87542	1.15299	5.5146	1.2905	1.68912
assembly10299_528bp	1.21557	0.000560658	1.89334	0.659405	2.18119	2.44443	0.825617	4.74775	3.25596	5.2091	2.52931	1.43966	1.8314	5.84344	0.805706	4.89843	0.807033	0.436144
assembly1029_1305bp	2.82025	3.91702	3.4399	1.90104	3.65402	3.15418	1.50045	2.19567	5.33764	4.88074	4.81088	3.86067	1.03418	3.28774	2.50864	2.54192	4.46693	5.08491
assembly102_598bp	0.302261	0.701955	0.440183	0	0	0.147875	0.264441	0.242519	0.44888	0	0.325357	0.159085	0.35579	0	0.275144	0.26933	0.130697	0.27873
assembly10300_538bp	4.23223e-21	0.410715	5.53436e-23	9.92613e-11	8.14705e-29	0	0.451112	0.300894	6.64115e-37	1.28845	0	0	0.683177	1.05478e-07	6.68514e-34	0.225155	2.023e-10	1.0814e-13
assembly10301_1893bp	0	2.01982e-17	0	1.27186e-51	1.2629e-33	1.22908e-24	0	1.87307e-26	9.74599e-47	9.24317e-27	7.08557e-29	8.67406e-10	0.0421337	1.72418e-11	0	2.30043e-33	0	2.82655e-41
assembly10302_339bp	0	0	0	0	0	0	0	0	0	0	0	0	0	0	0	0	0	0
assembly10303_479bp	0.329627	0	0	0	0	0	0	0.258521	0	0	0	0	0	0	0	0.194438	0	0
assembly10304_893bp	1.77789e-32	4.79869e-31	1.57135e-28	2.49037e-44	1.18609e-35	1.29871e-36	0	2.01198e-33	4.60415e-36	4.36689e-29	3.66639e-28	0.371327	0	7.6347e-25	4.57914e-17	1.08222e-31	0.154786	8.3011e-40
assembly10305_336bp	0	2.48607	0	0.746346	0	0	0	1.87855	0.909053	0.731109	0	0	0	0	0	0	0	0
assembly10306_698bp	3.9214e-05	1.92832e-19	3.43544e-21	1.49119	4.1348e-11	0.635027	6.60007e-19	0.065132	2.70708	0.00578892	0.435826	9.76935e-09	5.83854e-21	1.1897	2.17694	9.80642e-21	2.52574e-34	2.90298e-06
assembly10307_741bp	2.22235	2.86178	0.292348	0.00185342	0.247674	1.19562	2.70785	1.17599	1.26849	0.229558	0.0194442	1.20005	2.08006	0.521433	3.8651	0.806589	2.21414e-34	0.291527
assembly10308_562bp	0.031268	2.27072e-21	5.92301e-21	1.39972e-14	2.31323e-22	3.75977e-23	1.14247e-18	4.06393e-07	9.54959e-23	4.46101e-07	7.18076e-20	0.0150253	1.47779e-37	0.970551	4.04459e-13	0.236432	3.63522e-34	3.85451e-38
assembly10309_536bp	4.38262	0.404401	1.36203e-08	2.57791	0.69048	1.23496e-18	4.86661	0.820658	2.34242	1.61817	0.35256	0.439493	1.00302	3.92345e-05	1.36152e-45	1.40205	1.48092	2.43962
assembly1030_1461bp	11.6678	4.93141	7.6774	13.1451	16.1266	9.20938	11.3123	13.3574	12.3632	9.54491	5.12878	9.00602	10.9133	15.5669	10.0566	13.2463	10.9013	10.4305
assembly10310_1598bp	2.17215	0.958295	0.691807	0.653958	2.77092	1.43605	1.16639	0.493456	0.901493	2.19836	1.8405	0.559724	1.07878	1.80922	0.000659991	2.09504	0.185318	0.138916
assembly10311_1443bp	0.231944	3.2491	4.39556	1.07993	0.130836	0.618283	0.355011	3.39082	0.0999108	0.135548	0.179038	2.41465	2.6845	0.56259	0.91253	0.401216	1.46383	1.75043
assembly10312_1982bp	315.637	255.515	245.6	242.583	260.467	251.908	319.667	304.34	271.826	328.9	332.064	314.349	253.339	337.389	307.769	316.131	284.57	238.264
assembly10313_1212bp	90.8293	62.9459	45.2441	53.7266	94.9223	46.4725	79.0537	80.0237	42.6526	96.2274	87.6396	85.5135	58.4954	107.1	85.8712	81.3205	61.1347	67.3702
assembly10314_1163bp	147.911	132.962	128.91	104.224	56.0305	114.955	113.185	118.587	94.9267	138.605	141.297	138.768	120.765	120.222	126.439	119.084	111.405	117.582
assembly10315_3514bp	181.915	227.595	224.015	205.142	168.093	173.829	205.064	188.692	228.294	184.316	217.605	201.389	206.833	188.054	202.064	203.93	242.573	214.094
assembly10316_1224bp	130.45	142.876	119.97	112.113	127.861	102.558	103.845	123.186	134.01	113.861	123.079	110.956	113.64	130.231	111.021	136.36	130.525	117.618
assembly10317_3459bp	141.799	155.206	152.082	140.141	136.601	146.148	130.812	130.536	175.309	127.678	148.139	135.356	145.589	138.989	150.046	149.829	151.103	152.259
assembly10318_1055bp	215.97	208.917	214.377	226.527	203.701	220.78	182.403	197.291	238.452	218.751	201.3	219.511	204.042	179.729	240.697	236.945	191.241	237.858
assembly10319_941bp	0	0.307502	0.64732	0.567606	0.435453	0.322007	0	0.224626	0.332306	0.131632	0	0	0.652348	0.459049	0.435464	0.417029	0.432506	0.483156
assembly1031_1378bp	17.2806	17.4921	16.1574	24.7857	26.5881	20.07	26.1551	29.3527	17.15	12.6647	17.3228	18.6377	45.5396	28.3439	36.2326	20.0524	22.9377	23.2749
assembly10320_493bp	0	0.109453	2.53333	0.448962	0	0.28724	0.817576	0.00550488	4.6307e-13	4.14477e-18	1.17328e-22	0	0.0792174	0	1.20576e-16	0	1.03133	0.847048
assembly10321_529bp	0	0.27984	0.296151	0	0	0.296873	0	0	0	0	0	0	0	0	0	0	0	0
assembly10322_2102bp	0.631529	1.03611	1.19371	2.25223	2.57289	1.67886	0.974579	1.78196	2.25642	1.19995	1.11817	1.10454	2.036	2.19041	2.63373	2.03587	1.63489	2.16556
assembly10323_2015bp	2.68305e-16	3.41405e-16	0.726402	0.00903515	0.00356885	0.319222	0.24341	0.0696157	2.96537e-08	0.127067	0.000298161	3.85947e-06	4.63489e-06	7.49697e-05	0.693225	3.23846e-11	0.689777	0.00257935
assembly10324_1670bp	0	2.19696	3.49652	0.765961	0.125335	2.24245	1.76763	0.146251	1.25603	0.0569486	0.824914	0.695832	0.325917	0	1.04105	0	3.31858	1.05599
assembly10325_472bp	0	2.92592e-23	5.02813e-14	3.70315e-12	0	0.170414	1.09255e-11	0	4.57123e-21	0	9.39272e-53	0	0.178126	0	7.2431e-20	0	4.33627e-23	0.0147304
assembly10326_497bp	0.310563	1.01873e-17	4.2125e-07	3.62202e-06	8.16254e-19	0.165455	1.0492e-11	5.44811e-17	4.37121e-21	7.02153e-22	0.591521	0	0.165485	4.6824e-23	2.02764e-14	0	3.34411e-16	1.25577
assembly10327_598bp	0	2.05895	1.25995e-07	1.46338e-17	1.25458e-21	2.69197e-10	0.374977	1.93051e-16	2.64051e-16	0	2.8355e-13	0	0.0751412	0	0.0562214	0.0659149	1.78896e-21	0.477017
assembly10328_2072bp	0.0261397	0.25719	0.26312	1.37726e-08	0.0740962	0.846378	0.534889	0	0.222901	0	0.497696	0.0813567	0.141619	0	0.10245	0	0.100099	1.17057e-14
assembly10329_1994bp	0.0276971	0.825235	1.52306	0.677562	0.0882786	0.179804	0.433941	0	0.562971	0	2.27552	0.0968886	0.52401	0	0.474731	0	0.851319	0.525212
assembly1032_1388bp	2.02925	1.27335	1.91035	0.965013	2.49746	1.65588	0.608979	1.21719	3.98182	3.81631	2.01901	1.98215	0.25735	2.18766	0.649277	1.99816	2.29129	2.30302
assembly10330_830bp	0.000276504	0.274651	1.83448	0.682616	1.32836	0.610118	0.155255	0.344985	0.457626	0.535297	0.223214	0	0.48884	0.463527	0.0698397	0.0422156	1.36031	0.145145
assembly10331_494bp	0	0.39153	0.640414	0	0	0	0	0	0	0	0	0.441757	0	0	0	0	0	0
assembly10332_921bp	0.385997	1.79144	3.49168	0.0658466	1.16394	1.35229	0.601088	0.177203	0.565828	0.211239	3.33426	0.549558	0.220944	0.114969	2.14183	0.1336	0.968877	2.18053
assembly10333_789bp	0.353864	0.420257	0.325735	8.24946e-09	7.63883e-08	1.36917	0.490711	0.00180005	5.95972e-21	0	1.41349	5.1031e-13	0.793037	0.151437	0.360078	1.48501e-11	1.76729	9.88859e-12
assembly10334_371bp	0	0	0	1.11699	0	0	0	0	0.437603	0	0.934418	0	0	0	0	0	1.48606	0
assembly10335_365bp	0	0	0.367428	0	0	0	0.655714	0.274174	0	0	0	0	0	0.381832	0	0.210606	0	0
assembly10336_508bp	1.03068	3.93379	3.0035	2.33439	1.7299	3.80101	0	0.83227	1.15379	0.944475	2.5318	1.19804	4.83104	1.47892	1.02667	1.22337	1.39284	3.01193
assembly10337_385bp	11.4289	21.2261	15.8438	16.2884	27.4581	26.9114	23.2806	17.9896	15.8236	9.06826	10.8789	13.6465	25.8134	17.5779	21.021	15.8204	27.7249	22.1135
assembly10338_523bp	0	0	0	0	0	0	0	0	0	0	0	0	0	0	0	0	0	0
assembly10339_566bp	1.04475	0.404049	2.09909	0.738097	0.348855	1.72578	0.81368	5.45671e-42	0.439364	1.62146	1.41869	2.64823	1.01618	0.364113	0.378452	1.4141	3.11556	1.73286
assembly1033_745bp	0	0	0.92358	0	0	0	0	0	0.307929	0	0	0	0	0	0.523871	0	0	0.287075
assembly10340_305bp	30.1989	35.7292	29.6616	26.3432	32.6916	33.2956	37.8091	33.1346	22.0696	24.2422	17.4311	35.2374	19.1227	27.9651	16.7971	28.8877	38.9709	15.4185
assembly10341_584bp	0	0	0	0	0	0	0	0	0	0	0	0	0	0	0	0	0	0
assembly10342_474bp	0	0.537023	0	0	0	0	0	0	0	0	0	0	0	0	0	0	0	0
assembly10343_414bp	0	0.356426	0	0	0	0	0	0.261872	0	0.315806	0	0	0	0	0	0.205434	0	0
assembly10344_757bp	17.9055	18.753	13.4655	21.249	31.884	17.8631	18.9754	16.894	11.955	18.9942	14.1965	15.7662	13.8771	16.8519	17.0302	13.0198	24.2455	17.8978
assembly10345_389bp	0	4.32035	0	1.3562	0	0	0	0	0	1.23695	1.66418	0	0	0	0	2.40896	0	0
assembly10346_346bp	0	0	0	0	0	0	0	0	0	0	0	0	0	0	0	0	0	0
assembly10347_484bp	9.82209	9.40145	9.0763	7.81009	5.09207	4.52976	10.211	9.49882	7.6007	7.91673	10.6634	13.7285	6.75262	10.0804	10.5106	10.3799	9.38665	7.7905
assembly10348_541bp	0	0.416561	0	0	0	0	0	0	0	0	0	0	0	0	0	0	0	0
assembly10349_331bp	0	0	0	0	0	0	0	0	0	0	0	0	0	0	0	0	0	0
assembly1034_1595bp	11.5745	4.38443	5.22135	4.8307	2.89127	6.90557	3.39387	6.65414	7.29801	7.76326	2.96804	3.40407	0.813444	3.32116	2.2534	6.10567	2.28459	1.37613
assembly10350_422bp	0.418949	0.914025	0.483538	0	0	0	0	0	0	0	0	0	0.770627	0.914284	1.36978	0.25753	0.434053	0
assembly10351_334bp	104.631	90.0471	29.3218	24.4143	47.1153	19.3254	53.6905	58.7245	26.9373	94.0352	65.5806	70.4575	36.0779	46.5056	47.9629	57.7736	11.9139	27.5667
assembly10352_361bp	0	0	0	0	0	0	0	0	0	0	0	0	0	0	0	0	0	0
assembly10353_348bp	1.24392	1.58326e-24	0	0	0	0	5.43922	0	0	1.1241	0	0	0	0	7.6258e-25	0.745274	0	0
assembly10354_308bp	1.12387	8.05221	1.21694	0	1.05845	0	2.03436	7.58413	5.99996	3.18344	4.04791	4.18761	11.4759	3.61741	8.91706	4.38099	5.6406	8.15987
assembly10355_895bp	0	0.255822	1.60342	1.16271	3.20743	0.529943	1.51094	3.8973	0.54449	2.19891	0.595056	0.554018	0	2.51482	0.47983	2.21156	1.41602	1.05553
assembly10356_350bp	0	0	0	0	0	0	0	0	0	0	0	0	0	0	0	0	0	0
assembly10357_595bp	0	0	0	0	0	0	0	0	0	0	0	0	0	0	0	0	0	0
assembly10358_398bp	0	0.431117	0	0	0	0.434416	0	0	0	0	0.519976	0	0	0	0	0	0.393652	0.47545
assembly10359_327bp	0	0	0	0	0	0	0	0	0	0	0	0	0	0	0	0	0	0
assembly1035_1518bp	14.2405	10.0475	13.4621	10.0553	5.44151	11.4664	7.80333	5.65519	4.50643	8.67883	5.33381	7.39381	2.63174	4.59508	2.32407	4.98964	3.97751	1.43948
assembly10360_363bp	9.72535	2.84783	2.96178	6.23011	6.19376	2.97779	5.21521	2.40848	5.95179	11.1095	2.14507	11.6075	13.7547	6.8415	4.46431	9.04114	2.65181	3.90684
assembly10361_439bp	0	0.400317	0	0	0.351073	0	0	0	0	0.664786	0	0.444661	0.325122	0	0	0.214756	0	0
assembly10362_720bp	1.57321	2.24358	3.09463	1.05861	6.20504	2.80091	0	2.53986	2.45361	2.97819	0	1.61707	1.22592	3.63736	5.17597	5.46269	2.49739	3.55619
assembly10363_387bp	1.13868	0	0.65716	1.14149	0.526632	0	2.40379	0	0.668759	0.501306	1.43752	0	0.51945	1.78208	0.580776	0.343522	1.19809	0
assembly10364_337bp	3.20079	3.49208	1.20434	1.04916	0	1.11648	0	4.39863	1.25664	3.90259	0	0	0.967124	1.17593	1.07854	0.679113	2.14492	2.41888
assembly10365_427bp	0.577263	1.90229	0	0	0	0	1.20665	0.472378	0	0.533975	0	0.707886	1.04247	0	0	0.354519	0	0
assembly10366_553bp	37.1356	24.0899	19.2506	30.1905	62.7188	34.4178	24.8316	43.0234	27.0193	39.9114	23.2448	19.0781	16.9963	36.1796	25.8405	36.4366	26.1131	36.6748
assembly10367_458bp	0	0	0	0	0	0	0	0	0	0	0	0	0	0	0	0	0	0
assembly10368_522bp	26.0169	34.9593	32.9789	30.1598	25.5529	34.1632	32.5971	25.9225	33.081	17.5815	29.4881	27.5408	30.8038	23.1038	18.6025	23.8272	27.2376	21.4692
assembly10369_758bp	7.07185	2.24613	1.5664	2.45309	4.11077	3.98902	5.14474	5.85207	4.07402	5.98693	6.95243	4.155	3.10792	3.43429	4.59201	6.51037	3.58552	1.50659
assembly1036_1458bp	4.71488	7.7904	3.26094	4.37603	5.71078	3.46104	5.82319	5.23749	4.06156	3.84385	8.35251	3.95741	4.13308	3.75374	2.37198	4.65958	5.17915	5.01003
assembly10370_352bp	0	0	0	0	0	0	0	0	0	0	0	0	0	0	0	0	0	0
assembly10371_370bp	0	0	0	0	0	0	0	0	0	0	0	0	0	0	0	0	0	0
assembly10372_470bp	0	1.86309	0	2.32324	2.24617	0	4.75967	1.33282	0	2.06	0	0.68813	1.55907	1.18908	0	0.662289	1.82524	1.29411
assembly10373_375bp	0	0	0	0	0	0	0	0	0	0	0	0	0	0	0	0	0.6435	0
assembly10374_619bp	2.55031	3.12545	3.75001	7.94948	9.75136	5.17642	1.17801	4.50509	8.25033	2.33718	4.5765	2.26239	4.33845	3.82875	4.49351	4.24651	7.38947	5.74622
assembly10375_828bp	2.14142	3.25451	1.08377	3.32093	1.50928	2.70564	1.69247	3.46753	4.6602	2.41905	2.63026	3.5871	2.01159	3.6572	3.40652	2.39087	2.90789	3.02226
assembly10376_348bp	4.48977	5.80743	8.59305	2.25218	0	3.8179	4.70553	8.35046	5.31202	2.14052	4.14835	6.74364	8.25385	6.22296	2.34676	4.19517	2.25968	0
assembly10377_505bp	0	0	0	0	0	0	0	0	0	0	0	0	0	0	0.410482	0	0	0
assembly10378_408bp	0	0	0	0	0	0	0	0	0	0	0	0	0	0	0	0	0	0
assembly10379_385bp	7.95685	3.66006	4.72865	3.26114	8.70325	0	8.62029	1.8952	4.87935	9.41679	6.38693	3.06056	2.19605	4.96967	5.15989	8.9958	2.533	3.76861
assembly1037_3574bp	16.2583	8.94648	6.59462	25.7995	31.8121	13.1778	26.8228	21.9702	17.988	13.4358	12.4193	14.0855	38.4435	24.3319	37.5272	13.7981	19.34	14.2967
assembly10380_431bp	0.665424	2.46406	0.86368	0	1.29806	0	0	4.27019	1.81143	0	2.88962	0.89774	0.661787	1.38343	1.50969	0	1.57542	0
assembly10381_370bp	0	0	0	0	0	0	0	0	0	0	0	0	0	0	0	0	0	0
assembly10382_302bp	417.849	348.399	356.599	355.373	346.448	253.064	372.22	385.058	430.918	421.692	422.318	523.259	328.7	324.563	339.012	339.609	269.357	286.191
assembly10383_806bp	7.58089	5.32162	4.66772	5.44974	3.79149	1.78049	3.2504	5.17268	4.94733	7.05852	3.81304	7.46389	5.18785	1.93287	5.45714	5.20922	3.13605	5.80133
assembly10384_695bp	0	0	0	0	0	0	0.857728	0	0.240527	0	0	0	0.18649	0.227822	0.209355	0.125468	0.412565	0
assembly10385_397bp	0	0	0.837052	0.751683	0	0	0	1.8205	1.72951	1.36695	0.915684	0.858849	1.30985	1.58193	0.757003	3.21846	0.763575	1.58196
assembly10386_464bp	0	0.382237	0	0	0	0	0	0	0	0	0	0	0	0	0	0	0	0
assembly10387_623bp	0	0	0.234285	0	0	0	0.409453	0.977962	0.232966	0.192014	0	0	0.181721	0.657317	0.203406	0.120941	0.20438	0.215178
assembly10388_462bp	0	0.514492	0.554806	0	0	0	3.11488	0	0	0	0	0	0	0	0	0	0	0
assembly10389_316bp	0	0	0	0	0	0	0	0	0	0	1.41769	0	2.89201	0	5.57304	0	0	0
assembly1038_3568bp	0.429992	6.06889	7.89051	3.57068	7.60998	13.2197	5.45039	8.94154	12.7501	3.24371	4.65728	4.63624	12.0679	12.026	13.4173	5.37726	9.45128	9.19413
assembly10390_424bp	1.34351	1.87391	4.0054	2.17828	1.81925	2.4557	0	1.84301	0	1.28297	0.542498	1.58519	1.59822	0.985343	4.1383	1.40372	1.31132	1.47396
assembly10391_437bp	6.12965	8.07076	7.28117	23.094	27.3544	19.3104	7.10357	9.99542	5.66537	4.51796	3.92267	4.22205	5.2368	13.7332	12.4657	7.39728	15.3257	10.8268
assembly10392_453bp	0	0	0	0	0	0	0	0	0	0	0	0	0	0	0	0	0	0
assembly10393_449bp	5.38913	4.51294	1.95689	4.52443	6.79334	6.69257	3.46724	6.41026	3.17683	7.38582	2.12888	4.08589	2.41134	4.511	2.76955	5.23824	4.59248	5.89085
assembly10394_426bp	0	0	0	0	0	0	0	0	0	0	0	0	0	0	0	0	0.516112	0
assembly10395_436bp	0	0	0	0.946106	0	0.524642	0	0	0.55071	0.478547	0.585278	0	0	0	0	0	0	0
assembly10396_338bp	0	0	0	0	0	0	0	0	0	0	0.820469	0	0	0	0	0	0	0
assembly10397_434bp	0	0	0	0	0	0.663623	1.21658	0.467295	0.344303	0	0.361883	0	0.269199	0.322753	0	0	0	0
assembly10398_365bp	0	0	0	0	0	0	0	0	0	0	0	0	0	0	0	0	0	0
assembly10399_873bp	0.430379	2.24356	0.450103	1.07661	0.107406	2.00827	0.619581	0.514964	1.26267	0.0981846	0.121834	0.47374	0.0894635	0.454711	0.102058	0.874358	0.498887	0.106037
assembly1039_1789bp	0.0202397	0.0152978	0.0118893	0.0275679	0.0445105	0.00415521	0.0544725	0.0160468	0.0483409	0.0187874	0.0258891	0	0.0828174	0	0	0.02507	0.0680942	0.396025
assembly103_317bp	0	0	0	0	0	0	0	0	0	0	0	0	0	0	0	0	0	0
assembly10400_1043bp	0.245602	0.521462	1.91985	0.466081	0	0.133591	0.252725	0.383012	0.140801	0.793184	0.755564	0.708093	0.322095	0	0.360694	0.49902	0.360661	0.517826
assembly10401_1227bp	32.3447	40.0058	39.927	49.0918	43.9217	42.4997	29.3758	41.9794	29.5854	33.8195	24.5702	34.22	27.9114	35.734	25.0054	36.7089	32.0406	38.952
assembly10402_412bp	0	0	0	0	0	0	0	0	0	0	0	0	0	0	0	0	0	0
assembly10403_801bp	0	1.47842	0.7586	0.513664	0	1.1813	0	0	0.390944	0	0.82882	0	0	0	0	0	0.693341	0
assembly10404_489bp	7.17285	7.29378	3.31811	6.81797	4.07666	7.6663	4.80638	4.89854	5.25226	1.2269	5.59104	3.44416	4.13037	3.51655	9.11507	5.16078	3.06219	7.72857
assembly10405_571bp	0	0	0	0	0	0	0	0	0	0	0.362654	0	2.35382	0.89471	1.06888	0	0.151509	0.301767
assembly10406_742bp	81.8774	51.0887	52.9512	39.6071	70.8492	33.3995	34.3987	83.5679	53.2802	83.7717	47.979	68.3787	47.8275	71.2514	42.1762	80.8537	44.5341	43.6287
assembly10407_650bp	0	0	0	0.304551	0	0	0	0	0	0	0	0	0	0	0	0	0	0
assembly10408_1743bp	0.0828011	0.182697	0.190835	0	0	0.393998	0	0	0	0	0.213058	0	0.229692	0	0	0.047916	0.521537	0.286424
assembly10409_314bp	1.44489	1.58462	1.69702	1.42584	0	0	0	0	0	1.21391	0	0	0	0	0	0.844198	0	0
assembly1040_1936bp	0.0184924	0.665601	0.751729	0.330892	0.0364371	1.02368	0.380678	0.0145105	0.0402695	0.0170692	0.0194702	0.0307324	0.059483	0	0.215113	0.0207144	0.102712	0.183032
assembly10410_1718bp	0.12129	9.32267	13.457	2.27539	0	4.05532	6.55982	0.0474565	1.75071	0.0561597	7.30634	1.87913	1.77632	0	1.28706	0.0708794	6.29619	1.37652
assembly10411_3022bp	12.3575	14.586	18.851	12.3669	8.24113	16.6199	13.8449	11.2941	10.8714	10.9585	16.2219	12.1245	11.7603	11.9832	11.3772	10.5693	13.4584	11.3144
assembly10412_467bp	3.14785e-23	7.08495e-83	8.1657e-40	9.15078e-45	0.638934	7.35215e-09	0	0	0	0.600889	4.29227e-54	0	2.16932e-49	1.33327	0.696516	2.58564e-57	0.683742	0.757486
assembly10413_733bp	0	0	0	0	0	0	0	0	0	0	0	0	0	0	0	0	0	0
assembly10414_883bp	0	0	0.145898	1.39401	0	0.882286	1.32526	0	1.79622	0	0	0.152964	2.30072	0	2.32567	0	0.893656	0
assembly10415_2123bp	0.105876	1.25996	1.7474	0.867276	0.105966	0.858808	2.13665	0.0408336	0.634928	0.0961903	1.53662	0.437944	0.900576	0.109839	0.801197	0.0305649	2.09233	0.304731
assembly10416_515bp	2.27271	0	0.535813	0.972561	0.00349025	3.5271e-07	0.980187	1.42681	0	0	2.343	0	2.52037e-18	0.486468	4.73726	1.60111	1.46991	1.59465
assembly10417_3108bp	0	1.0336	1.51356	0.709284	0	1.83382	1.08725	0	0.525572	0.0332073	1.39913	0.254852	0.216483	0	0.222258	0	1.21641	0.375702
assembly10418_1091bp	0	0.190951	0	0	0	0	0	0	0	0	0.220615	0	0	0	0	0	0	0
assembly10419_2457bp	0	1.10735	1.53203	0.866562	0.208763	0.623805	1.61685	0.04059	0.582869	0.0482371	0.892822	0.498765	0.479126	0.0544431	0.866508	0	1.0308	0.310108
assembly1041_2014bp	0.0183009	0.0623893	0.611223	0.0674593	0.0358374	0.00442375	0.32991	0.0143649	0.039341	0.0168792	0.349589	0.0303338	0.0564248	0	0.0532796	0.0202911	0.100227	0.148981
assembly10420_333bp	0	0	0	0	0	0	0	0	0	0	0	0	0	0	0	0	0	0
assembly10421_712bp	0.252906	2.8184	7.31903	0.790489	1.24833	5.07812	5.46546	0.593479	0.928534	0.466584	3.26565	1.22019	1.6141	1.32897	1.04231	0.608927	1.54526	1.76124
assembly10422_372bp	0	0	0	0	0.73573	0	0	0	1.97853	0	0	0	0	0.840156	0	0	0	0.962174
assembly10423_486bp	94.5808	58.7037	0.461984	42.1268	0	77.3096	35.6229	0	46.0771	0	44.7035	54.2392	36.2721	0	34.6719	66.5786	43.7429	57.442
assembly10424_1579bp	0	2.16741	4.74154	0.450117	0	1.45294	2.13943	0.142677	0.863422	0	2.07703	0.954185	0.581063	0	1.47767	0.105822	1.84473	0.608846
assembly10425_551bp	0	0	0.430869	0	0	0	0	0	0.90365	0	0.469394	0	0	0	1.49439	0	0	0.425411
assembly10426_894bp	0	0	0	0	0	0	0	0	0	0	0	0	0	0	0	0	0	0
assembly10427_1056bp	0.22083	1.24458	2.49713	0.52919	0.321288	2.05218	1.28481	0.346714	0.736916	0.305482	2.3532	0.37064	1.10925	0.458471	1.50111	0.520486	1.25371	0.23325
assembly10428_310bp	0	0	0	0	0	0	0	0	0	0	0	0	0	0	0	1.01635	0	0
assembly10429_367bp	0	0	0	0	0	0	0	0.50663	0.74124	0.576419	0.784907	0.769251	0.561039	0.689534	0.662453	1.55455	0	0
assembly1042_1789bp	0.035829	0	0.041379	0.0733685	0	0.0834214	0.0787692	0	0	0	0.184957	0	0	0	0	0	0.0365016	0.041634
assembly10430_1319bp	0	0	0.0930013	0.0789825	0	0	0.344313	0	0	0	0.101822	0	0	0	0.161096	0	0	0
assembly10431_515bp	2.61495	3.37094	2.5527	0.821992	0.658375	4.52355	1.64394	4.74171	2.80067	4.99061	0	1.88545	2.67716	3.35821	2.28419	3.5288	2.42761	1.85748
assembly10432_1251bp	0.397132	0.712179	0.854063	2.57718	3.39634	2.19209	0.807057	1.46435	0.892898	1.00063	0.118055	0.776824	1.86608	2.55981	2.47787	1.04645	2.68657	2.46279
assembly10433_761bp	0	0.625042	0.331979	0.851826	0	1.31977	5.59661	0	0.692471	0	2.2672	0	0.79106	0	0.887441	0	1.78288	0.328873
assembly10434_350bp	0	9.06952	21.0949	1.64364	0	5.39997	6.11087	0	1.80294	0	6.63927	0.935948	3.38575	0	0.794947	0	8.65317	1.74508
assembly10435_1915bp	39.7877	34.3354	31.8635	30.5734	34.7921	26.5822	34.2105	29.4951	33.0977	38.684	44.3519	44.4082	25.1828	28.5695	34.4896	38.8911	27.026	34.4074
assembly10436_3436bp	0.0328416	0.824217	2.4303	0.905753	0.0332852	0.993977	1.22162	0.0510866	0.451848	0.0301495	0.562288	0.111403	0.32091	0.0695402	0.261921	0.0566497	1.60704	0.391958
assembly10437_568bp	0	0.212749	0	0	0.205952	0	0	0	0.235826	0	0	0	0	0	0.408333	0.124197	0.399572	0
assembly10438_2772bp	30.7235	24.7767	22.4858	23.7393	23.623	21.9631	25.6796	24.578	21.5637	28.4736	26.1863	25.6578	22.5534	25.7619	24.9114	28.4452	23.042	22.7136
assembly10439_2866bp	0.0408668	0.960721	1.41795	0.286233	0.123804	0.463694	0.344606	0	0.288584	0.0745945	1.43574	0.0943574	0.223131	0	0.371358	0.0470658	0.809092	0.461677
assembly1043_1869bp	0.035763	0	0.0414495	0.0736732	0	0.0843341	0.0789481	0	0	0	0.186052	0	0	0	0	0	0.036595	0.0417992
assembly10440_2719bp	0	0.71616	1.55443	0.494036	0	0.567707	0.463352	0.0253008	0.256909	0	0.919152	0	0.398042	0	0.19036	0	0.568948	0.174987
assembly10441_1998bp	126.117	141.23	130.314	124.04	125.281	122.112	138.792	159.363	143.512	127.188	130.963	139.651	192.116	175.712	164.141	175.901	188.509	147.359
assembly10442_989bp	93.0506	75.796	80.1617	61.1826	75.776	60.4917	81.0584	89.4223	81.2248	73.992	64.4613	73.5928	85.9134	75.0007	86.1723	85.0746	65.552	79.5522
assembly10443_524bp	0	0.434125	1.13847	0.196061	0	0.445265	1.5622	0	0	0	0.987188	0.245279	0.372753	0	0.214628	0	0.199755	0
assembly10444_617bp	0	0	0	0	0	0	0.595471	0	0	0	1.43966	0	0.25027	0	0	0	0.574111	0
assembly10445_568bp	0	0	0	0	0	0	0	0	0	0	0	0	0	0	0	0	0	0
assembly10446_1682bp	0.0677661	0.833582	1.93495	0.518046	0.134529	0.740785	0.684905	0.211919	0.307785	0.123607	1.05843	0.300597	0.528999	0.0702312	0.391692	0.197748	1.02833	0.43772
assembly10447_449bp	8.34793	4.19745	5.23706	12.9422	85.3717	18.2309	0	5.03755	0	4.41026	0.94504	0.924388	5.4659	25.7954	5.32419	0.470627	9.34935	0
assembly10448_3531bp	2.06165	1.53796	1.54869	2.1629	1.94076	1.77019	2.30367	1.76842	1.55829	1.67684	2.52279	1.46506	1.61543	2.43309	2.02955	1.76717	1.43477	1.95618
assembly10449_651bp	0	0.31615	0.682149	0	0	0.677835	0.611805	0	0	0	0	0	0.268697	0	0	0	0.300972	0
assembly1044_1873bp	0.12947	0.6139	0.366425	0	0	0.223916	0.408046	0.0996729	0.228646	0.178434	0.32675	0.29893	0.287589	0.268757	0.259171	0.337386	0.0638744	0.0746892
assembly10450_600bp	6.12984	6.58922	7.17716	7.89174	8.12113	10.7932	9.25287	11.5181	9.02873	5.65529	12.522	9.57385	8.32502	8.6476	7.17016	10.2102	9.3326	6.35357
assembly10451_335bp	0	2.51038	0	0	0	0	2.37443	0.815214	0	0	1.46476	1.48229	0	0	0	0	0	6.53858
assembly10452_1440bp	0	1.45921	1.23171	0.177819	0	1.03174	0.775185	0	0.32091	0	0.910018	0	0.579403	0	0	0.104386	1.44176	0.2021
assembly10453_687bp	44.3284	41.4068	47.5328	38.5303	36.9026	40.755	54.6856	35.5868	55.532	49.1012	61.8057	56.8534	42.057	44.5388	61.8437	43.5507	44.4458	34.5291
assembly10454_544bp	13.7148	9.64891	6.74578	5.80721	2.2498	3.65245	7.98006	9.64989	5.38816	10.0999	11.2441	10.5503	6.91538	5.0343	7.79389	11.5234	8.44485	9.50837
assembly10455_1369bp	80.3344	103.303	105.396	92.3769	79.3383	76.5138	79.3743	58.8474	90.3592	69.395	86.9119	85.739	57.0841	44.3659	64.4065	56.7853	72.4854	63.6849
assembly10456_2531bp	0.0426562	0.6922	1.05253	0.238921	0	0.680963	0.338992	0.166688	0.282856	0.078338	0.754938	0.18583	0.437171	0.0449616	0.28511	0.0248913	0.595788	0.268956
assembly10457_758bp	37.3834	29.6553	28.5454	35.5276	38.9315	35.9271	53.3206	48.9278	37.6178	30.1291	23.1634	31.3303	64.9212	60.9564	56.965	28.5804	53.3383	23.6802
assembly10458_374bp	2.25093	0	2.97265	8.40039	0	0	0	1.71779	0	0	0	3.2297	0	4.51505	0	6.52934	0	0
assembly10459_413bp	0	1.21076	1.23162	0	0.538324	5.0353	2.19854	1.73194	3.76995	1.52763	0	0.676891	2.74677	3.96591	1.59878	2.32714	1.11107	1.86214
assembly1045_1343bp	4.11942	2.37641	1.42212	3.16014	4.50737	2.74163	2.25989	6.21821	3.2258	6.62609	3.88062	3.80672	4.0976	6.60773	3.82322	6.2551	2.08398	3.84291
assembly10460_1097bp	38.5309	35.7792	33.0014	37.2123	32.5392	31.8332	38.0964	39.4765	45.453	36.4113	49.3578	54.1322	48.9735	34.3744	46.9712	39.7443	34.694	38.2716
assembly10461_458bp	0.301763	2.57141	3.06125	0.25663	0	0.89181	0	0	0.618711	0	0.33455	0	0.241266	0	0	0	1.87713	0.28697
assembly10462_1447bp	0	1.86659	3.20679	1.05196	0.130672	1.00334	1.01654	0.15116	0.558257	0.119408	1.4313	0.701309	0.65098	0	0.791152	0.149723	1.50003	0.593474
assembly10463_1689bp	16.8041	19.3963	16.1576	10.7124	6.36128	13.1677	25.5552	17.871	16.7451	18.5439	26.088	24.4196	36.6175	28.744	29.4492	23.1602	24.4055	14.5075
assembly10464_1773bp	20.6612	21.1862	22.9122	20.69	25.0564	21.9782	19.8214	25.0415	23.3757	18.5208	20.3861	20.3905	23.7892	22.9356	26.7979	23.4675	22.7379	18.8669
assembly10465_4441bp	13.5243	11.3021	10.1792	11.3315	14.527	12.2032	11.2918	12.8514	10.6814	13.4404	11.8747	9.8997	11.4209	13.4787	13.2252	13.7024	11.3312	12.25
assembly10466_1526bp	0.0683711	1.85125	2.6992	0.665918	0.0665653	1.14236	1.97726	0	0.313205	0	0.763302	0.234338	0.537565	0.214755	0.400753	0.0776117	1.54218	0.679745
assembly10467_1206bp	100.618	73.5703	105.63	496.99	497.794	442.243	51.7641	124.326	42.6281	119.703	60.0486	67.6782	139.754	261.951	228.012	32.5441	448.249	39.0455
assembly10468_8087bp	24.0306	19.5341	18.6216	19.3191	24.099	19.3136	18.1559	25.1426	18.3091	23.4324	19.504	14.3503	15.8307	25.9091	15.7084	26.6854	19.5404	17.1508
assembly10469_596bp	42.9959	55.1405	41.8725	49.2109	46.6736	41.6678	62.901	37.0312	45.4456	40.7101	70.1623	58.6993	35.4827	34.8983	51.3641	40.6302	47.2419	47.5386
assembly1046_1531bp	91.9755	91.0184	94.8347	90.0989	74.5935	87.3087	108.357	109.498	113.174	82.6747	102.572	106.611	117.321	103.614	121.776	93.8463	103.125	90.0862
assembly10470_380bp	0	0	0	0	0	0	0	0	0	0	0	0	0	0	0	0	0	0
assembly10471_432bp	0	0	0	0	0	0	0	0	0	0	0	0	0	0	0	0	0	0
assembly10472_313bp	0	0	0	0	0	0	0	0	0	0	0	0	0	0	0	0	0	0
assembly10473_379bp	0	8.61758	7.41364	0	0	0.829042	4.35109	0	0	0	2.8029	2.71286	0.639134	0	0	0	5.18164	0.834638
assembly10474_577bp	38.0416	46.7244	33.3173	34.9206	36.4864	39.8392	29.8135	36.933	31.4143	41.2607	26.5299	30.412	26.9399	55.237	34.1365	42.3961	36.5262	25.496
assembly10475_311bp	2.45927	3.36188e-76	2.85255	1.27369	3.34508	1.51452	0	2.86778	0	1.07483	0	3.12415	1.07308	3.83393	1.27557	0.765231	2.61924	4.1256e-24
assembly10476_452bp	0	0	0	1.05704	0	0	0	0	0	0	0	0	0	0	0	0	0	0
assembly10477_595bp	129.426	160.482	142.474	138.783	72.5544	150.053	186.7	132.214	156.958	112.651	155.534	165.039	177.138	144.789	174.449	157.678	180.963	147.664
assembly10478_446bp	0	0	0.98392	0	0	0	0	0	0	0	0	0	0	0	0	0	0	0
assembly10479_607bp	0	1.53106	8.72061	0	0.68443	2.80965	0	0	2.0782	0	1.74724	0.409294	1.87767	0	0	0	1.7185	0.787868
assembly1047_2346bp	0.0844101	1.12773	2.30033	0.527205	0	0.547606	0.590131	0	0.523491	0.0772139	1.4225	0.189266	0.584157	0.0877066	0.326346	0.0243267	1.90216	0.315053
assembly10480_442bp	0	1.50301	0.533076	0	0	1.07344	1.86319	0	1.63472	0	0	0	0.41776	0	0.479099	0	2.35201	0
assembly10481_1794bp	23.1213	20.3179	19.6284	15.2762	12.6213	15.6844	18.9944	21.1962	22.0228	19.748	19.7934	21.5287	18.9477	22.4922	17.1357	20.4078	17.8974	21.3897
assembly10482_540bp	1.67574	2.02054	1.04147	0	0.404481	0	0	3.58623	0.567916	1.89758	0.603232	0.568093	0.8113	0.427291	0.464479	4.38583	0.975152	0.548258
assembly10483_1477bp	29.9645	27.0053	28.7383	29.6649	28.9029	24.1686	38.0884	23.8575	29.6538	28.7239	38.2758	37.5357	25.1763	25.7915	27.8544	25.5457	30.6616	26.6131
assembly10484_1274bp	0.248861	0.390527	0	0.229843	0.253357	0.268482	0.261688	0.46736	0.426263	0.780803	0.449678	0	0.225774	0.647973	0.602995	0.139839	0.237033	0.130152
assembly10485_828bp	0	0.468164	0.243672	0	0	0.248472	0	0.50443	0	0.394339	0	0.253478	0.595314	0	0.218416	0.126147	0	0
assembly10486_581bp	0	0	0	0	0	0	0	0	0	0	0	0	0.289768	0	0	0.192137	0	0.351729
assembly10487_529bp	8.69523	8.1708	10.8136	5.03052	5.10099	6.38939	10.4335	6.30432	4.83031	4.72157	11.5787	16.6737	15.9401	4.94829	6.74055	5.71024	9.28091	17.8649
assembly10488_1844bp	0.115991	0.244248	0.381677	0.114939	0.118383	0.391331	0.232285	0.0913753	0.329166	0	0.494776	0.065608	0	0.0618783	0.115105	0.101354	0.63196	0.251344
assembly10489_1311bp	2.08616	4.31819	6.45247	1.40043	0.952303	2.5025	3.63912	1.67637	2.68934	1.42291	4.61539	2.65041	3.24162	1.71425	2.81669	1.5449	4.85499	2.05937
assembly1048_524bp	2.52936	0	2.59662e-24	1.82364	3.12675	2.04792	1.80861e-45	2.42415	2.15921	0	2.19231	2.07342	1.04168	4.29863	2.97197	1.20899	0.614655	1.36991
assembly10490_1499bp	3.43639	2.73836	5.35488	34.3297	75.7947	28.2328	0	10.2557	0.997976	7.35516	2.0502	1.98992	8.49895	27.8849	13.9174	1.61511	45.2929	1.50468
assembly10491_2349bp	29.0742	29.8805	28.1204	42.0553	40.5963	44.7222	27.6339	38.4734	31.7529	25.0619	29.0281	25.5357	46.2663	34.7236	30.6933	31.6302	33.9509	46.1552
assembly10492_565bp	0	12.1259	14.2525	1.75442	0	3.62708	10.8624	0	0.46304	0	14.9482	4.68152	4.81638	0	1.92482	0	7.54758	2.073
assembly10493_1585bp	80.2527	80.2599	78.8132	79.8087	70.5237	81.8305	78.1749	83.5754	80.6241	76.4575	84.8698	95.1261	88.8403	85.5474	88.7467	94.5883	82.4855	95.3851
assembly10494_308bp	1.68032	1.7708	0.941519	0.790724	0.776429	0	0	1.37174	1.85374	0.752722	0	0	0	0.89956	3.28707	2.6442	0.827328	1.87281
assembly10495_304bp	0	0	0	0	0	0	0	0	0	0	0	0	0	0	0	0	0	0
assembly10496_310bp	0	0	0	0	0	0	0	0	0	0	0	0	0	0	0	0	0	0
assembly10497_406bp	0	0.676211	0	0	0	0	0	0	0	0	0	0.754409	0	0	0	0	0	0
assembly10498_353bp	1.88331	0	0	0	0.900578	1.09631	0	0.756417	1.13143	0	1.2204	0	0	0	1.01684	2.91318	0	2.24266
assembly10499_373bp	0	0	0	0	0	0	0	0	0	0	0	0	0	0	0	0	0	0
assembly1049_453bp	37.0035	20.0612	18.1632	37.4291	38.4468	36.4332	23.2106	42.6102	18.6136	45.8134	32.6236	29.8922	43.4106	47.993	53.8032	35.7436	15.0873	24.5366
assembly104_425bp	7.2581	8.89319	9.01687	7.32265	10.2154	8.27651	2.90098	8.23825	4.13556	5.53451	8.19293	8.52075	9.25014	13.3234	11.8998	14.2112	13.8393	12.5054
assembly10500_402bp	0.64499	0	0	0	0	0	0	0.492455	0	0	0	0	0	1.33963	0	0	1.22056	0
assembly10501_304bp	39.867	22.2782	16.5117	16.1087	32.6301	21.1107	14.6344	45.446	25.4383	40.4489	16.7445	22.9785	29.8318	24.7023	18.0451	29.6887	23.04	12.4038
assembly10502_533bp	0	0	0	0	0	0	0	0	0	0	0	0	0	0	0	0	0	0
assembly10503_302bp	0	0	0	0	0	0	0	0	0	0	0	0	0	0	0	0	0	0
assembly10504_307bp	1.23547	4.01857	1.37314	0	0	0	0	0	0	2.22212	6.25803	0	0	1.31118	0	1.51927	0	0
assembly10505_324bp	0	0	0	0	0	0	0	0	0	0	0	0	0	0	0	0	0	0
assembly10506_375bp	0.42227	0.409528	0.443799	0.382535	0	0	0	0	0	0	0	0	0	0	0	0	0	0
assembly10507_388bp	0	0	0	0	0	0	0	0	0	0	0	0	0	0	0	0	0	0
assembly10508_358bp	0.697474	0	0.803095	0	0.656005	0	0	1.10555	0	0	0.894522	0	0	0	0	1.66105	0	0.802124
assembly10509_362bp	0	0	0	0	0	0	0	0	0	0	0	0	0	0	0	0	0	0
assembly1050_1364bp	0	0.0883025	0.36025	0.0344365	0	0	0.0807012	0	0	0	0.0476572	0	0.0158845	0	0.13084	0	0.0178452	0
assembly10510_467bp	0	0	0	0	0	0	0	0	0	0	0	0	0	0	0	0	0	0
assembly10511_322bp	0	0	0	0	0	0	0	0	0	0	0	0	0	0	0	0	0	0
assembly10512_515bp	0	0.327897	0.689459	0	0	0.66174	0.640849	0	0	0	1.49419	0	0.267659	0	0	0	0.603115	0.316003
assembly10513_363bp	0	0	0	0	0	0	0	0	0	0	0	0	0	0	0	0	0	0
assembly10514_327bp	11.0072	5.67986	2.95086	9.17009	13.4492	4.5996	5.28181	3.47375	4.54644	10.3755	4.83187	3.26524	0	11.9441	5.64223	5.26433	2.73478	5.6324
assembly10515_333bp	0	0	0	0	0	0	0	0	0	0	0	0	0	0	0	0	0	0
assembly10516_342bp	0	0	0	0	0	0	0	0.620196	0	0	0	0	0	0	0	0.484208	0	0
assembly10517_301bp	0	0	0	0	0	0	0	0.692173	0	0	0	0	0	0	0	1.09037	0	0
assembly10518_495bp	0	0	0	0	0	0	0	0	0	0	0	0	0	0	0	0	0	0
assembly10519_332bp	0	0.797829	0	0.790464	0	0	0	0	0	0	0	0	0	0	0	0	0	0
assembly1051_1431bp	0	0.0778804	0.10509	0.00644537	0	0	0.0751871	0	0	0	0.0448474	0	0.0152684	0	1.26047e-32	0	0.0171221	0
assembly10520_381bp	0	0	0	1.17756	0	0	0	0	0	0	0.752328	0	0	0	0	0	0	0
assembly10521_304bp	0	1.81849	0.262964	0	1.3532	0	0	0	3.89427	0	0	0	0	1.57018	0	0	0	0
assembly10522_440bp	0	0	0	0	0	0	0	0.434019	0.286766	0	0	0	0.229862	0	0	0	0	0
assembly10523_328bp	0	0	0	0	0	0	0	0	0	0	0	0	0	0	0	0	0	0
assembly10524_474bp	2.38615	2.82249	4.14567	1.60953	0.912797	1.84122	5.57729	4.71646	0.633699	5.18099	1.39531	1.29079	1.40084	1.98129	1.06054	3.39013	3.2973	1.8596
assembly10525_448bp	0	0	0	0	0	0.689507	0	0.979907	0	0	0.783709	0	0	0.644507	0	0	0	0
assembly10526_471bp	0	0	0	0	0	0	0	0	0	0	0	0	0	0	0	0	0	0
assembly10527_321bp	0	0	0	0	0	0	0	0	0	0	0	0	0	0	0	0	1.16107	0
assembly10528_308bp	0	0	1.97021	3.47608	2.41162	3.02563	7.24169	1.40266	1.99779	1.57181	1.12496	4.34811	3.03562	0	0	0	0.877918	0
assembly10529_306bp	0	3.04847	0	0	0	0	0	2.10844	0	0	0	1.83735	1.28019	0	0	1.67371	0	8.53967
assembly1052_1341bp	0	0.0940468	0.446154	0.0354075	0	0	0.0841836	0	0	0	0.0498865	0	0.0163025	0	0.139454	0	0.0183375	0
assembly10530_347bp	0	0	0.434251	1.10501	1.17236	0	0	0	0.439994	0	0	0	0.337021	0.462379	0	0	0	0
assembly10531_410bp	0	0	0	0	0	0	0	0.980022	0	0	4.22243	0	0	0	0	3.01012	0	0
assembly10532_300bp	0	0	0	0	0	0	0	0	0	0	0	0	0	0	0	0	0	0
assembly10533_451bp	0	0	0	0	0	0	0	0	0	0	0	0	0	0	0	0	0	0
assembly10534_304bp	0	0	0	0.998754	0	0	0	0	0	0	0	0	0.960825	0	0	0	0	0
assembly10535_329bp	0	3.9531	4.0696	5.12647	0	3.92869	0	0	2.07038	1.67531	2.16976	0	0	3.84292	0	3.36447	1.79099	0
assembly10536_310bp	2.62982	0	0	0	5.40945	0	0	15.8355	0	7.20868	0	0	0	0	0	0	0	3.69706
assembly10537_362bp	0	0	0	0	0	1.20066	0	0	0	0.91434	0.674881	0	0.913067	0	0.538831	0	3.22621	0
assembly10538_457bp	0	0	0	0	0	0	0	0	0	0	0	0	0	0	0	0	0	0
assembly10539_340bp	0	0	0	0.668571	0	0.767686	0	0.580953	0	0	0	0	0	1.58311	0	0	0	0
assembly1053_1810bp	0	0.0347783	0.0156216	0.00472407	0	0	0.0437875	0	0	0	0.0273814	0	0.0114702	0	9.40311e-33	0	0.0125749	0
assembly10540_354bp	0	0	0	0	0	0	0	0	0	0	0	0	0	0	0	0	0.573677	0
assembly10541_367bp	0	0	0	0	0	0	0	0	0	0	0	0	0	0	0	0	0	0
assembly10542_354bp	19.7452	18.6461	11.579	11.7252	6.93846	13.6221	28.9442	18.3936	10.6338	19.2142	13.1354	16.7613	8.31053	23.7544	15.8064	18.8773	18.5624	15.8449
assembly10543_463bp	2.34885	0	0	0	0	1.36201	0	3.56973	0	1.07658	1.55886	0	1.10095	2.38839	4.99435	2.00977	0	1.35614
assembly10544_339bp	0	2.79472	0	3.48155	0	0	0	0	0	0.809864	0	2.10299	0	0.986063	0	0.557947	0.866062	0
assembly10545_425bp	5.71833	0	0	0	0	0	5.6892	0	0	0	0	0	0	2.37217	0	0	0	0
assembly10546_346bp	2.8783	0	0	0	0	0	0	0	0	2.64888	0	0	0	0	0	1.78712	0	0
assembly10547_352bp	0	0.751348	0.796236	2.05827	2.61426	0.792966	0	2.16215	0.804664	1.22109	0.866474	0.832152	1.2361	0.726561	1.40139	0	0	0
assembly10548_377bp	0	1.91876	0.500126	0	0	0.961083	0.884515	0.742063	0	0	0	0.543781	0	0.5008	1.80298	0	0.446319	0.945698
assembly10549_350bp	0	0	0	0	0	0	0	0	0	0	0	0	0	0	0	0	0	0
assembly1054_1454bp	0	0.0726665	0.0889879	0.00627888	0	0	0.0714421	0	0	0	0.0430074	0	0.0148922	0	1.22916e-32	0	0.0166804	0
assembly10550_342bp	0	0	0	0	0	0	0	0	0	0	0	0	0	0	0	0	0	0
assembly10551_335bp	0	0	0	0	0	0	0	0	0	0	0	0	0	0	0	0	0	0
assembly10552_366bp	0	0	0	0	0	0	0	0	0	0	0	0	0	0	0	0	0	0
assembly10553_322bp	0	0	0	0.970508	0	0.535841	0	0	0	0	0	0	0.446362	0	0	0	0	0.615722
assembly10554_308bp	0	7.76355	0	1.76339	1.469	0	0	1.23616	0	0	0	0	0	1.65711	0	0	0	0
assembly10555_451bp	0	0	0	0.399048	0	0	0	0	0	0	0	0.491138	0.647285	0	0	0	0	0
assembly10556_490bp	2.40091	3.1761	3.64617	1.20712	0.862869	4.05301	1.81002	2.31429	0	3.68855	3.331	2.82133	2.4022	4.10847	1.81637	3.0662	2.0708	0.667366
assembly10557_335bp	0	0.575667	0	0	0	0	0	0	0	0	0.661193	0	0.930899	0	0	0	0.530306	0
assembly10558_323bp	0	0.961926	0	2.50167	0	0	0	0	0	0	0	0	0	0	0	0	0	0
assembly10559_402bp	0	0	0	0	0	0	0	0	0	0	0	0	0	0	0	0	0	0
assembly1055_1181bp	0.575615	1.38529	0.715888	2.40284	2.83719	4.63332	1.83375	0.717334	2.02864	1.39177	2.43628	1.2309	2.61044	4.89648	3.51084	3.35872	1.75443	1.46576
assembly10560_328bp	0	0	0	0	0	0	0	0	0	0	0	0	0	0	0	0	0	0
assembly10561_342bp	0	0	0	0	0	0.707121	0	0	0	0	0	0	0	0	0	0	0.644406	0.697224
assembly10562_440bp	0	0	0	0	0	0	0	0.737208	0	0	0	0	0	0	0	0	0	0
assembly10563_375bp	0	0	0	0	0	0	0	0	0	0	0	0	0	0	0	0	0	0
assembly10564_355bp	0	0	0.962164	0	0	0	1.74669	1.31028	3.05398	0	0	2.20214	2.90801	1.69898	3.41605	0.99286	0	1.00223
assembly10565_406bp	0	0	0	0.336535	0	0	0	0	0	0	0	0	0.567743	0	2.40538	0	0	0
assembly10566_390bp	8.77591	6.79987	9.48958	2.03871	3.35162	8.57818	5.87785	10.8664	5.88245	11.4469	1.83425e-16	6.87382	6.96697	10.2349	5.03434	6.67856	14.3455	10.5439
assembly10567_429bp	14.3347	10.9952	10.2573	19.08	21.4386	14.6299	14.2196	8.18779	11.1884	14.8959	21.8951	21.2569	11.3689	10.1312	9.26588	11.0464	10.0018	16.4988
assembly10568_419bp	0	0	0	0	0	0	0	0	0	0	0	0	0	0	0	0	0	0
assembly10569_394bp	0	0.481746	0	0.435795	0	0.506587	0	0	2.73187e-44	0	0	0	0	0	0	0	4.28785e-35	0
assembly1056_699bp	1.99002	5.90064	1.45926	4.25456	5.40372	3.69653	6.66025	2.65431	3.20502e-24	5.92373	4.76291	0.766501	2.87123	6.69775	3.72325	6.15797	3.86516	1.76374
assembly10570_311bp	0	0	0	0	0	0	0	0	0	0	0	0	0	0	0	0	0	0
assembly10571_334bp	0	0	0	0	0	0	0	0	0	0	0	0	0	0	0	0	0	0
assembly10572_302bp	5.47463	0	0	0	4.78519	0	0	3.98874	0	0	0	0	0	0	0	0	0	0
assembly10573_315bp	0	0	0	0	0	0	0	2.44432	0	0	0	0	4.21875	3.13245	0	1.86741	0	0
assembly10574_323bp	0	0	0	0	0	0	0	0	0	0	0	0	0	0	0	0	0	0
assembly10575_484bp	0	0	0	0	0	0	0	0	0	0	0	0	0	0	0	0	0	0
assembly10576_337bp	3.67878	0	0	0	0	0	0	0	0	0	0	5.18661	0	7.3046	3.99342	0	0	0
assembly10577_400bp	0	0	0	0	0	0	0	0	0	0	0	0	0	0	0	0	0	0
assembly10578_362bp	0	0	0	0	0	0	0	2.34252	0	0	0	0	0	0	0	0	0	0
assembly10579_632bp	0	0.661227	0.224244	0	0	0	0	0	0.235529	0	0	0.23925	0.179369	0	0	0	0.415516	0
assembly1057_3577bp	0	0.442221	0.721824	0.0709091	0	0.355926	0.40674	0.0195436	0.199634	0	0.639018	0.198366	0.109448	0	0.33768	0.0144335	0.60293	0.18722
assembly10580_335bp	0	0	0	0	0	0	0	0	0	0	0	0	0	0	0	0	0	0
assembly10581_320bp	1.40906	0	0.000693757	6.53374e-71	8.50886e-72	0	0	2.28803	1.36608e-58	1.10315e-63	1.81917	2.6952e-43	2.5684	0.000561445	9.84262e-55	1.24263	1.36843e-64	0
assembly10582_321bp	0	0	0	0	0	0	0	0	0	0	0	0	0	0	0	0	0	0
assembly10583_311bp	0	0	0	0	0	0	0	0	0	0	0	0	0	0	0	0	0	0
assembly10584_372bp	0	0	0	0	0	0	0	0	0	0	1.60166	0	0	0	0	0	0	0
assembly10585_556bp	0.264376	1.19296	0.911867	2.95891	5.30037	1.23352	3.45324	1.78736	12.6287	3.0127	0.691106	1.64756	1.93682	6.41004	1.641	4.11882	18.4632	9.52924
assembly10586_361bp	0	0	0	0	0	0	0	0	0	0	0	0	0	0	0	0	0	0
assembly10587_317bp	0	0.895693	0	0	0	0	0	0	0	0	0	0	0	0	0	0	0	0
assembly10588_306bp	0	0	0	0	0	0	0	0.997865	0	0	0	0	0	0	0	0.752141	0	0
assembly10589_398bp	0.594583	0.631661	0.696162	0.573338	0	0	1.31092	1.33546	1.41237	0.516049	0	0.735572	1.05187	0	0	0	2.39574	0
assembly1058_1487bp	3.99351	4.86965	5.88971	4.96566	5.54738	7.09269	4.97384	5.74766	8.22833	4.2378	3.60191	4.84392	8.41675	6.78034	7.3553	6.17548	6.41825	2.73198
assembly10590_379bp	4.39194	10.469	13.5233	2.38676	6.65705	4.04438	10.2699	2.31905	2.91705	9.35496	9.24347	7.49864	8.03699	4.13642	6.84237	3.03356	2.48292	7.3623
assembly10591_331bp	0	0	0	0	0	0	0	0	0	0	0	0	0	0	0	0	0	0
assembly10592_851bp	0	0.430889	0.452589	0	0	0.45814	0	0	0	0	0	0	0.361933	0	3.5016e-19	0	0	0.926031
assembly10593_430bp	0	0.30001	0	0.562554	0	1.25032	0	0	0	0	0.344819	0	0.241868	0	0	0	0.806544	0.329649
assembly10594_828bp	1.94534	0	0	2.42345	0.400468	0.547707	0	1.21551	0.57513	0.361855	1.19583	1.63508	0.828837	0.397808	0	1.37354	0.488809	0
assembly10595_417bp	0	0	0	0	0	0	0	0	0	0	0	0	0	0	0.531138	0	0	0
assembly10596_667bp	0	0.259678	0.810578	0.469274	0	0.269552	0	0	0.277664	0	0	0	0	0	0	0	0	0
assembly10597_321bp	1.49801	1.64404	0	4.6074	14.3339	1.69142	0	1.22083	0	1.37659	0	0	2.79276	1.61029	3.26352	0.947236	0	0
assembly10598_468bp	0	0.404825	0.866103	0.812512	0	4.05619	0.812985	0	0	0.33094	1.44533	0	2.06872	0.400451	0.803697	0	0.789172	0
assembly10599_698bp	7.50112	12.8247	8.01637	5.24876	7.01523	17.7727	10.9191	21.319	10.7237	11.8488	11.8362	10.8047	13.7262	18.1217	7.86792	8.48997	5.27229	9.23226
assembly1059_1052bp	0	0.047676	2.67563e-05	3.1508e-09	0	0.302338	2.76405e-19	0	0	0	0.0699762	0	0.430743	0	0.206574	0	1.86577e-21	0.145996
assembly105_439bp	0	0	0	0	0	0	0	0	0	0	0	0	0	0	0	0	0	0
assembly10600_388bp	3.08489	2.41723	0	7.53856	8.91366	1.25159	3.38493	3.7803	3.85532	0.571313	1.32234	0.675918	1.03088	6.76083	1.75948	3.07995	3.32485	3.1015
assembly10601_624bp	1.96864	4.97493e-52	0.981041	0	3.0504	0.491593	2.78214	3.24688	2.56777	6.01026	2.19653	2.52138	2.31098	2.82055	4.67382	4.27147	0.887547	2.53655
assembly10602_354bp	0	0	0	0	0	0	0	0	0	0	0	0	0	0	0	0	0	0
assembly10603_317bp	1.29336	1.32044	0	0	0	0	0	2.07365	0	1.1592	0	0	0	0	0	2.39856	0	0
assembly10604_375bp	0	20.124	28.253	5.91075	0	13.2094	13.6323	0	8.17331	0	28.108	1.14074	3.26396	0.472985	8.05272	0	17.4	3.71574
assembly10605_360bp	0	0	1.67699	0	0	0.540412	0	0	0	0	0	0	0	0	0	0	0	0
assembly10606_437bp	0	0.769034	0	0.349477	0.370921	0	0	0.303838	0	0	0.445995	0.433771	0	0.399749	0.365948	0	0.715759	0.377326
assembly10607_423bp	1.47424	0.841235	0	0	0.732924	0.873527	0	0	0.909585	0	0	0	0.689082	0	0	0	1.5971	0
assembly10608_494bp	1.58141	0.642687	1.70347	0.929733	0.966246	0.351402	1.89201	1.81229	0.362488	0.879927	0.362924	1.09873	0.281436	1.03988	0.967189	0.590624	0.622686	0.706565
assembly10609_796bp	51.426	30.8368	34.2076	32.7615	34.3708	40.5443	38.2023	44.6157	41.7419	44.8962	29.5768	29.4146	19.7289	36.702	26.4	60.1841	40.5332	41.033
assembly1060_971bp	0	0.67999	0.463584	0.966009	0	1.57069	1.14236	0	0	0	1.12576	0.317403	1.03134	0	0.48322	0	1.64937	0.156031
assembly10610_1143bp	0	0	0	0	0	0	0	0	0	0	0	0	0	0	0	0	0	0
assembly10611_548bp	2.8441	0	0	0	1.448	1.78235	6.84147	0	0	5.28863	0	0	1.43285	0	0	1.64325	0	1.80967
assembly10612_695bp	0.696925	0.755977	0.526671	0.240873	0.686606	1.07847	1.94722	1.78283	2.16062	2.35158	2.09034	2.51132	2.71776	5.83721	3.60286	4.4597	3.28683	0.779674
assembly10613_1627bp	0	0	0	0	0	0	0	0	0	0	0	0	0	0	0	0	0	0
assembly10614_990bp	0	0.536403	0.903662	0	0	0.664481	0.415163	0.0788299	0.235916	0	0.250149	0	0.351753	0	0.0993539	0	0.292589	0.224051
assembly10615_1117bp	3.64607	1.6059	1.70283	0.350098	0	1.21635	0	1.40618	0.429992	3.12123	0.920195	0	0	1.52237	1.08974	1.65737	0.369115	0.385041
assembly10616_654bp	0.226697	0	0	0	0	0	0	0	0	0	0	0.748348	0	0	0	0.135426	0	0
assembly10617_404bp	0	0	0	0	0	0.804509	0	0	0	0.326247	0	0	0	0	0	0	0	0.400611
assembly10618_360bp	0.417791	0	0	0	0	0	0	0.687898	0	0.384195	0	0	0	0	0	0.750076	0	0
assembly10619_511bp	0	0	0.404695	0	0	0.403589	0	0	0	0	0	0	0	0	0	0	0	0
assembly1061_320bp	0	0	0	0	0	0	0	0	0	0	0	0	0	0	0	0	0	0
assembly10620_978bp	0	0	0	0	0	0	0	0	0	0	0	0	0	0	0	0	0	0
assembly10621_309bp	8.67295	0	0	0	0	2.90209	0	1.76722	0	2.02407	0	0	2.29138	6.98642	0	1.39645	2.65478	0
assembly10622_763bp	0	0.158124	0	0	0.155214	0	0	0	0	0	0	0	0	0.167411	0	0	0	0
assembly10623_803bp	19.1893	20.0499	17.8087	21.5793	31.7357	20.2494	13.2035	23.0197	16.7089	16.8317	13.2742	16.0391	15.153	19.9743	15.78	16.4604	21.9314	27.9763
assembly10624_368bp	1.08544	0	0	0	0	1.28408	0	0	0	0	0	0	0	0	0	2.81948	0	0
assembly10625_1027bp	0.632441	1.71942	3.06861	0.859824	0.258178	0.840806	2.31775	1.07369	1.32353	0.233276	2.6287	0.858992	0.879983	0.131791	1.46432	0.581843	1.84739	0.984661
assembly10626_443bp	0	0	0	0	0	0	0	0	0	0	0	0	0	0	0	0	0	0
assembly10627_302bp	5.13109	9.99413	8.04014	13.1538	11.5096	14.1872	7.5294	20.1105	6.74504	16.085	9.17097	13.7932	6.63942	14.7328	9.40632	15.171	5.72875	0
assembly10628_610bp	58.7907	42.75	41.0279	23.3319	43.4963	25.534	39.5598	46.2476	29.5735	61.8668	51.9161	50.0477	29.9261	21.2357	32.7366	37.4594	30.4451	32.9252
assembly10629_466bp	5.74998	10.3242	9.56424	29.6305	19.1556	41.0439	6.52591	20.5969	13.703	7.78486	9.93032	7.07336	10.0524	23.2009	9.56427	14.2433	27.442	27.3399
assembly1062_400bp	0.887251	1.03957	0	0	0	0	0	0	0	2.44593	1.20196	0	0	1.85867	0	0.537526	0	0
assembly10630_1283bp	0.167402	0.0924026	0	0.251539	0.86034	0.772727	0	0.604632	0.58562	0.234802	0.211022	0.097887	0	0.0886461	0.508174	0	0	0.92145
assembly10631_411bp	0	0.677011	0	0	0	0	0	0	0	0	0	0	0	0	0	0	0	0
assembly10632_388bp	1.98888e-61	4.29077e-56	3.35904e-67	3.92893e-23	3.63478e-40	8.40388e-68	1.87601	0.375438	1.84516e-42	2.15171e-57	5.90723e-36	0.577161	1.68899	3.83868e-36	7.55802	2.70889e-61	3.23423	1.00255
assembly10633_642bp	0	0	0	0	0	0	0	0	0	0	0	0	0	0	0	0	0	0
assembly10634_685bp	13.42	6.01951	4.06287	3.87021	5.12283	3.11281	2.49586	4.25753	4.1895	12.1976	3.40352	9.69688	2.87738	7.338	3.8714	6.67883	2.77903	6.53711
assembly10635_421bp	1.68896	1.20626	1.26958	4.10209	3.39516	3.31435	2.32608	3.22345	0	4.20969	2.806	2.6576	3.58061	6.68301	5.30345	2.10473	1.1641	0.648061
assembly10636_552bp	0.523127	1.15256	0	1.60214	2.5212	1.21991	0	0.795256	0.649044	2.80536	0.670825	1.27673	0.468377	0	2.63834	2.13273	0	0
assembly10637_329bp	0	0	0	0	0	0	0	0	0	0	0	0	0	0	0	0	0	0
assembly10638_2359bp	7.02817	7.67616	7.66677	8.01588	6.18209	7.1563	7.54739	7.56054	7.02002	8.10977	8.12152	8.87537	7.12189	5.38059	9.06675	7.72498	5.72053	6.88763
assembly10639_556bp	1.44395	2.52908	3.11569	1.98744	0.761255	1.54057	1.37868	1.48927	2.32194	1.04611	2.8925	0.831063	1.26579	2.37762	0.355833	3.28761	0.346132	0.367793
assembly1063_1589bp	0	0.215742	0.598989	0.0660154	0	0.375168	0.275332	0	0.0772496	0	0.417758	0.15552	0.295874	0	0.133571	0.0388191	0.197366	0.0728456
assembly10640_458bp	6.52011	0	5.91193	2.54321	7.30916	3.49591	1.26498	4.48993	2.86972	4.1462	9.25096	2.20113	3.25017	3.5471	4.19663	7.54032	4.44436	10.1407
assembly10641_1864bp	0.0536997	0.604184	1.61204	0.415941	0	0.821829	1.06192	0.0847934	0.300426	0.0995209	1.09076	0.119241	0.0927437	0.113408	0.210427	0	0.868732	0.568308
assembly10642_581bp	0	0.800822	0	0	0	0.877244	0	1.3238	0.894016	1.25818	0.948487	0	0.328423	2.16428	1.1119	2.64214	0.380979	2.67568
assembly10643_667bp	0	0	0	0	0	0	0	0	0	0	0	0	0	0	0	0	0	0
assembly10644_511bp	32.9113	25.3884	30.5925	33.2906	33.4261	35.5854	21.3405	31.2129	31.0339	31.3994	37.3572	39.8333	27.7	23.0895	21.8107	29.0352	31.8485	18.4021
assembly10645_968bp	0.564767	0.219471	0	0.200758	0.186871	0.92887	0	0	0.240447	0.516076	0	0.467312	0.352673	0	0	0.215975	0.204548	0.23104
assembly10646_2256bp	0	0.437623	0.695424	0.0510553	0	0.409374	0.319208	0	0.0595176	0	0.774511	0.0584517	0.182551	0.10753	0.305246	0	0.302286	0.0573166
assembly10647_514bp	0	0	0	0	0	0	1.53005	0	0	0	0.906958	0	0.65557	0	0.367073	0	0.36075	0
assembly10648_474bp	0	0	0	2.06241e-51	0	0	0	0	0	0	0	0	0	0	0	0	0	0
assembly10649_526bp	0	0	0	0	0	0	0	0	0	0	0	0	0	0	0	0	0	0
assembly1064_625bp	0	0.151174	0	0.275512	0	0	0	0	0	0	0	0	0	0	0.14595	0	0	0
assembly10650_2668bp	0.278187	0.194998	0.620007	0.77133	0	0.416262	0.196796	0.603457	1.04238	1.14004	0.348437	0.316896	0.785713	1.46122	0.505405	0.908439	0.0902943	0.629925
assembly10651_1140bp	13.5778	6.71355	10.6947	26.9443	63.4787	29.4615	2.38492	22.6869	2.08504	17.7127	8.82606	5.20467	4.70303	38.3328	7.08591	12.9143	17.6637	2.0616
assembly10652_512bp	0	0	0	0.37974	0	0	0	0	0	0	1.48428	0	0	0	0	0	0.379452	0
assembly10653_376bp	0	0	0	0	0	0	0	0.649634	0	1.53642	0	0	0	0	3.61794	0	0	0.964818
assembly10654_494bp	6.11934	7.00591	3.67571	2.14522	7.29966	6.05101	5.7084	11.1326	1.2746	4.74602	4.11328	5.90563	1.47368	6.51323	11.0559	6.82859	1.49924	5.49766
assembly10655_818bp	0	0.349764	0	0	0	0	0.336687	0	0	0	0	0	0.147485	0	0.162884	0.294608	0.972163	0
assembly10656_543bp	0	0	0	0	0	0	0	0	0	0	0.409389	0	0	0	0	0	0	0
assembly10657_720bp	0	0	0	0	0	0	0	0.253404	0.180505	0.298006	0	0.550202	0.141334	0.703958	0.479432	0.281149	0.318537	0.176106
assembly10658_565bp	0.243515	0.244511	0	0	0.694579	0	0.459256	0.557828	0.522526	0	0	0	0.397898	0	0.451673	0.280762	0.222714	0
assembly10659_723bp	27.7564	16.1513	21.3357	22.502	30.1513	22.6657	16.1257	28.5032	18.6608	24.562	18.0492	22.2206	19.4974	24.3179	18.4151	27.9224	13.9988	19.9066
assembly1065_2143bp	21.4507	18.0419	20.3108	16.2886	15.3006	17.0665	18.1015	18.9022	16.5532	18.2069	17.2023	15.6594	15.0286	18.4693	17.686	20.811	17.3266	14.3399
assembly10660_337bp	4.75663e-60	5.83257	6.09596	2.46637	0	5.46487	7.47167	0	0	4.55083e-53	5.39925	2.36792	2.18441	0	0	0	3.20277	0.708552
assembly10661_563bp	0	0.202985	0	0	0	0	0	0	0	0	0	0	0	0	0	0	0	0
assembly10662_506bp	0	0	0	0	0	0	0	0	0	0	0	0	0	0	0	0	0	0
assembly10663_483bp	2.3317	2.0627	2.79197	0.639196	4.54199	0.723318	2.64351	3.11349	2.2326	3.73027	0.803721	4.62652	1.6815	4.78186	1.9249	3.81453	1.3094	0.727941
assembly10664_665bp	0	0	0	0	0	0	0	0	0	0	0	0	0	0	0	0	0	0
assembly10665_1808bp	17.2596	17.262	18.2216	28.9417	27.9212	24.4836	17.0589	17.2701	16.6063	12.2553	17.3726	14.8849	15.1649	15.5601	13.5032	17.483	17.6543	18.3716
assembly10666_516bp	0.570667	0	0	0	0.575841	0	1.29804	0	0.719156	0	0.797483	0	2.26499	0.596933	1.29072	1.3721	1.30898	0.703217
assembly10667_594bp	1.02608	0	0	0.731419	0.259486	1.10374	0.490865	0	0.837117	0.479258	0.909947	0	0	0	0	0.151845	0	0
assembly10668_573bp	0	0.483227	0.170542	0	0	0.845015	0.297787	0.137026	0.338016	0	0.550819	0.541252	0	0	0.464175	0	0.293258	0
assembly10669_333bp	0	0	0	0	0	0	0	0	0	0	0	0	0	0	0	0	0	0
assembly1066_308bp	0	0	0	0	0	0	0	0	0	0	0	0	4.55121	0	2.13296	0	0	0
assembly10670_822bp	13.3861	11.4236	11.4505	13.0419	17.2569	10.3753	6.94778	13.1802	12.5779	13.6274	7.92401	9.5916	8.53921	14.0079	10.6828	13.1476	11.698	9.73315
assembly10671_2226bp	0	0	0	0	0	0.111958	0	0	0	0	0	0	0	0	0	0	0.0495942	0
assembly10672_994bp	0.2896	0.307574	0.330237	0.141502	0.151589	0.818668	0	0.116677	0.500766	0.138234	0.362124	0.329669	0.518763	0.315284	0	0.173235	0.285183	0.321351
assembly10673_2907bp	0	0.70038	1.11806	0.273919	0	0.272505	0.854576	0.0269026	0.1609	0	0.811701	0.315858	0.459961	0.0363602	0.308351	0	1.32166	0.115069
assembly10674_746bp	0.365981	9.47324	14.4328	3.78731	0.340972	4.17731	7.4133	0.134401	4.13011	2.9051e-21	11.1052	2.85852	1.32087	0.578373	3.60005	0.836056	9.47406	4.16425
assembly10675_597bp	0	11.8541	31.7679	2.87642	0.285219	5.69399	15.8134	0.916111	4.33963	0	10.8434	4.61075	2.91068	0	5.71231	0	12.6673	2.28397
assembly10676_1701bp	0	0.0977499	0.290114	0.119015	0	0.409247	0.125493	0	0.0354302	0	0.112623	0.140882	0.136429	0	0.212603	0	0.117043	0
assembly10677_1721bp	0	0.0973274	0.0521484	0.119864	0	0.0727441	0.126414	0	0.0354429	0	0.113836	0.141822	0.137184	0	0.212309	0	0.064722	0
assembly10678_896bp	0	0	0.189619	0	0	0	0	0	0	0	0	0	0.153787	0	0	0	0.168725	0
assembly10679_1058bp	0.00191363	1.51169e-18	0.18906	0	0	3.26302e-20	1.41797e-35	0.668542	1.31632e-16	8.46215e-15	0	0	0	0	8.4317e-05	1.72032e-06	4.18146e-12	0.317533
assembly1067_1154bp	0	0	0	0	0	0	0	0	0	0	0	0.323456	0	0	0	0	0.185677	0
assembly10680_1129bp	0.994752	0.795681	0.162346	0.150223	0	0.675025	0.31113	0.288906	0.175055	1.03752	0	0	0	0.149838	0.586337	0.332251	0.445724	0.223777
assembly10681_354bp	0.887588	0	1.03506	0	0	1.07877	0	0.713035	0	0.829272	0	0	0	0	0	0	0	0
assembly10682_349bp	0.825773	0	1.73393	1.46308	0.793775	0.839492	0.799881	0	0	0	0.479257	0	0	0.896808	0.799737	0	0	0
assembly10683_360bp	0	0	0.0448947	0	0.865306	1.14696e-07	0.856707	0.682405	0.970842	0.816212	0.518152	0	0.744095	0.940204	1.66977	0	0	0
assembly10684_311bp	0	0	0	0	0	0	0	0	0	0	0	0	0	0	0	0	0	0
assembly10685_328bp	0	0	0	0	0.673304	0	0	1.68964	1.64845	0	0	0	3.79878	0.775821	0	0.448267	0.667307	0
assembly10686_309bp	0	0	4.16066	0	0	0	0	0	0	0	0	0	0	1.80704	0	0	0	2.25256
assembly10687_511bp	0.807807	0	1.85632	0	0	0	0	1.97823	0	0.760667	2.02473	0	0	1.77002	0.849962	1.94681	3.26755	0
assembly10688_302bp	1.37691	0	0	0	0	0	0	1.10608	0	1.22168	0	0	2.50637	1.48687	0	0.844733	0	0
assembly10689_1863bp	11.5155	7.97224	5.59101	10.6795	9.01394	10.3995	8.28758	11.183	8.48851	9.49318	8.98219	8.21228	10.7857	10.2798	12.6193	9.98704	12.036	7.14098
assembly1068_1025bp	0	4.91896e-50	1.81197e-54	0	0	0	0	0.144113	0	0.340355	3.96428e-62	0.412436	2.16711e-50	0	1.45808e-41	0.211037	1.64787e-59	0
assembly10690_1937bp	1.32225	2.20547	4.12081	0.908816	2.69925	1.95168	2.37218	2.27798	1.9515	3.09463	1.5133	3.54797	1.03007	1.59375	0.313989	3.12732	0.149612	2.73418
assembly10691_338bp	1.20309	0	0	0	0	0	1.06781	1.94559	1.82902	0.538629	0	6.72017e-17	0	1.29521	0	0	0	1.10166
assembly10692_3379bp	0.11886	0.60694	0.925863	0.470223	0.0888627	0.820339	0.176162	0.159875	0.163479	0.108038	0.630111	0.0983592	0.435677	0.28004	0.226268	0.0503788	0.892434	0.0921075
assembly10693_372bp	0	0	0	0	0	0	0	0	0	0	0	0	0	0	0	0	0	0
assembly10694_558bp	0	0	0	0	0	0	0	0	0	0	0	0	0	0	0	0	0	0
assembly10695_1402bp	15.5282	12.3037	12.2541	15.4516	21.3113	21.4964	15.935	19.0377	8.64741	17.4949	15.0315	13.4002	16.163	19.0324	13.9674	21.6788	11.6917	19.9057
assembly10696_1643bp	2.01126	0.584483	1.07556	1.98139	0.831104	0.447933	0.235504	2.30478	4.91276	3.01409	0.774239	1.19128	0.907902	2.35083	0.465989	3.23504	4.21644	4.01868
assembly10697_350bp	6.79695	5.8182	5.08969	4.45999	0.855434	3.07785	1.83391	3.33224	4.22103	0.753943	3.37919	0	3.97524	4.4133	5.55008	1.51035	1.86342	1.1405e-94
assembly10698_691bp	0	0	0.877384	0	0	0	0	0	0.469913	0	2.38874	1.37566	0	0	0	0	0.392682	0
assembly10699_1816bp	0	0.585865	1.72494	0.29936	0.0630937	0.760369	0.516959	0	0.283746	0	0.686606	0.138975	0.44342	0	0.305519	0	1.08347	0.337209
assembly1069_1496bp	16.4351	10.1396	12.1465	6.83778	7.75565	6.89306	22.9873	14.5588	8.57736	14.5034	15.4953	13.6981	20.0192	12.2067	17.7125	15.0571	11.3079	9.46599
assembly106_697bp	0	0	0	0	0	0	0	0	0	0	0	0	0	0	0	0	0	0
assembly10700_443bp	0.448565	4.46034	11.513	0.9344	0.410803	5.24285	9.90094	0	4.42442	0	2.95535	0	1.24337	0.459707	1.8652	0	3.79565	1.0907
assembly10701_1031bp	0.00668597	0.934261	4.91901	2.37957e-09	0.0713298	0.545593	0.884001	0.115041	1.20188	6.97885e-07	2.09822	0.165432	0.529264	0	0.141178	0	0.143076	0
assembly10702_1129bp	0.288646	4.02884	7.3203	3.11736	0.0613035	2.81183	0.160031	0.0904099	0.697652	0.223448	1.20537	0	0.735857	0	2.60507e-22	0	2.05824	0.911899
assembly10703_1682bp	0.225089	4.20843	5.9196	0.357259	0.183564	0.376212	1.38491	0.209636	1.11904	0.33162	1.34419	0.721277	0.0806873	0	0.709834	0.309417	1.06022	0.293289
assembly10704_893bp	0	0.531669	0	0	0	0	0	0	0	0	0.306551	0	0	0	0	0	0.722499	0
assembly10705_677bp	2.51717	0.460996	0.478548	0	0.449022	0	0	1.02127	0.50059	1.96417	0	0.505965	0	0.448395	0.427665	1.77175	0.435007	0.488728
assembly10706_791bp	0	0	0	1.38032	1.5485	0.795635	2.98608	2.84408	7.51783	2.60879	3.99532	1.23573	7.0029	4.72327	5.65959	2.35135	2.10238	4.4372
assembly10707_658bp	0	0	0	0	0	0	0	0	0	0	0	0	0	0	0	0	0	0
assembly10708_737bp	0	0	0	0	0	0	0	0	0	0	0	0	0	0	0	0	0	0
assembly10709_412bp	0	1.26721e-08	0	0.585827	0	4.64188e-39	0	0	0	0	0	0	0	0	0	5.6468e-17	0	0
assembly1070_1098bp	0	0.345941	0.0927714	0.235899	0	0.270089	0.16193	0.0756812	0.368717	0.262703	0.699528	0	0.287708	0	0.501244	0.0551697	0.313218	0.339911
assembly10710_432bp	0	2.35035	1.21562	0	0	1.85468	0	0	0	0	0	0	0	0	0	2.62204e-11	0	0
assembly10711_661bp	0	8.74668e-09	0	0	0	1.26321e-14	0	0	0	0	0	0	0	0	0	0.144148	0	0
assembly10712_1615bp	0	0.0805073	0	0	0	0	0	0	0	0	0	0	0	0	0	0	0	0
assembly10713_425bp	0	0	0.325449	0	0	0	0	0	0	0	0	0	0.251684	0	0	0	0	0
assembly10714_1946bp	0	0.514642	1.80763	0.578335	0	0.560282	0.849633	0	0.678685	0	1.20699	0.366543	0.215861	0	0.405051	0.0882444	1.06326	0.0921015
assembly10715_1010bp	0	1.0534	0.604602	1.42717	1.01597	0.500036	2.44693	5.2937	1.48796	1.49748	0.572414	0.464571	3.95351	2.91881	0.553605	0.789742	1.54268	3.69031
assembly10716_1106bp	0	0.0137222	0.499835	9.86576e-15	2.31817	0.145313	6.43402e-08	1.61477	1.71792	3.347e-06	0.491333	0.0346829	0.220826	0.729338	0.434214	0.605997	1.1728	0.161534
assembly10717_1398bp	0.126715	0.264323	0.348706	0	0	0.851187	0.25486	0.307729	0.426882	0.298371	0.541031	0.0710796	0.221857	0.0672765	0.062725	0.0379084	0.68135	0
assembly10718_2307bp	0	0.318843	0.531655	0.245197	0	0.206475	0.379694	0	0.0714654	0	0.223492	0.0686767	0.0535797	0	0.238702	0	0.179338	0.276506
assembly10719_395bp	0	0	0	0	0	0	0	0	0	0	8.49821e-14	1.73449e-18	0	0	0	0	6.2229e-17	0
assembly1071_776bp	0.329713	0.487269	1.0449	0	0.164843	0.335625	0.306519	0.262281	0.1731	3.13046e-73	0.36788	0	0.548148	0.51742	0	0.676419	0.302956	0.162457
assembly10720_711bp	0	0.204533	0	0.199709	0	0	0.394106	0	0.226672	0	0.239161	0	0.174132	0	0	0	0.37639	0
assembly10721_754bp	0	0	0	0.139997	0	0	0	0	0	0	0	0	0	0	0	0	0	0
assembly10722_453bp	0	0.394184	0	0.357532	0	0.800525	0	0	0	0.679044	0	0	0	0	0.364168	0	0	0.398786
assembly10723_448bp	0	0	0	0	0	0	0	0	0	0	0	0	0	0	0	0	0	0
assembly10724_599bp	0	0	0	0.179693	0.215231	0	0	0.168099	0.213708	0	0	0.224192	0.168537	0.449681	0	0	0	0.207057
assembly10725_354bp	0	0.644112	1.37768	0	0	0.670305	1.16243	0	0	0	0	0	0	0	0	0	0	0
assembly10726_1089bp	0	0.166959	0.523659	0	0	0.351236	0.985035	0	0	0	0	0	0	0	0	0	0.156628	0
assembly10727_336bp	4.46871	1.86658	0	0	1.38898	0	7.09771	1.17881	2.08828	2.74312	4.34824	0	4.4775	0	0	2.80168	0	0
assembly10728_333bp	0	0	0	0	0	0	0	0	0	0	0	0	0	0	0	0	0	0
assembly10729_588bp	0	7.23577e-67	2.76289e-22	0	0	0	0	0	0	0	0	0	0	0	0	0.0449491	0.143495	0
assembly1072_322bp	0	0	0	0	0	0	0	0	0	0	0	0	0	0	0	0	0	0
assembly10730_615bp	0	0	1.64075e-10	0	0	0	0	0	0	0	0	0	0	0	0	0.0452583	0.151042	0
assembly10731_623bp	0	6.87307e-67	0.697526	0	0	0	0	0	0	0	0	0	0	0	0	0.0418108	0.131548	0
assembly10732_354bp	28.0949	8.9626	17.1713	31.4348	29.1613	32.9423	11.0611	43.0471	22.997	16.8159	12.8157	13.7926	33.8179	25.0789	26.0795	31.7316	23.6786	26.4837
assembly10733_863bp	0	1.85656	3.04346	0.607092	0	2.20764	1.02208	0	0.570885	0	2.32575	0.436997	1.22008	0	0.246377	0	2.69645	0.279015
assembly10734_1115bp	3.56935	2.983	1.95717	1.84916	1.75588	3.14389	0.90615	1.91867	0.842022	3.02728	2.18006	1.17665	1.03522	1.95686	2.17812	3.60865	0.726883	0.786129
assembly10735_354bp	0	0	0	0	1.16606	1.5395	0	0.996493	0	1.09638	0	0	3.6906	1.29549	0	2.97528	6.94924	0
assembly10736_600bp	0	0	0.463998	0.392248	0	0	0	0	0	0	0	0	0	0	0	0	0.808219	0
assembly10737_848bp	0.312765	0.979855	0.868391	0.967822	0	0.532508	0.622177	0.124605	0	0.144451	0.581717	0	0	0.169638	0.160229	0.0928439	1.23335	0.343287
assembly10738_1269bp	0	0.637027	0	0.198102	0	1.37245	0	0	0.475541	0.0912621	0.249255	0	0	0	0.195637	0	0.199071	0
assembly10739_482bp	0	0	0	0	0	0	0	0	0	0.165328	0	0	0	0	2.21759e-26	0	0	0
assembly1073_1784bp	0	0.328312	0.697346	0.109891	0.0312868	0.115433	2.41912e-15	0	0.037481	0	0.12747	0.0754962	0.286585	0.0326974	0.511753	0.0183095	0.627339	0.213148
assembly10740_782bp	0	0.147326	0	0	0	0.151678	0	0	0	0	0	0	0	0	0	0	0.133101	0
assembly10741_537bp	5.15173	0.913704	2.76992	3.39138	6.01278	5.85566	0	2.95035	1.99723	2.79454	1.04154	3.91441	6.63994	7.61608	3.34191	6.59011	4.35875	10.6802
assembly10742_915bp	0.133338	0.264548	0	0.737275	1.10265	0.692382	0	2.35002	0.143911	0.124479	0	0	0	2.86562	0	0.316647	0.734339	0
assembly10743_340bp	5.53156	4.97102	1.67328	0	1.16121e-54	5.42553e-48	0	2.15933	0	1.23312	1.91865	5.79722	1.30123	4.14817	3.06186	0.848637	0	3.62148
assembly10744_405bp	0	0	0	0	0	0	0	0	0	0	0	0	0	0	0	0	0	0
assembly10745_1282bp	8.41408	9.77467	9.98153	36.4728	44.4821	39.4979	10.5658	22.2208	9.15498	8.65935	7.09713	7.96186	14.334	21.6208	9.85207	19.6801	32.5531	28.96
assembly10746_1380bp	0.757824	1.0141	0.896021	0.527516	6.89663	0.127754	0.893527	2.30403	1.33958	4.8967	0.140585	0.0219008	7.00085e-06	4.80693	0.638934	1.03687	0.227982	1.70643
assembly10747_1221bp	44.8486	47.2398	49.5424	54.8389	48.6378	54.1352	53.1294	46.2804	45.143	41.5806	51.3164	48.1768	38.6557	48.7111	43.8657	44.6264	44.4759	39.5899
assembly10748_436bp	15.3753	7.72562	13.6779	2.92192	0.839935	5.64945	4.85769	7.32248	1.38321	6.88837	8.12261	4.91197	0.727153	0.921428	0.858075	7.13364	2.56382	0.901216
assembly10749_391bp	0	0	0	0	0.832611	0	0	14.455	0	0	0	0	0	0	0	0	0	0
assembly1074_1869bp	0	0.0842682	0.447698	0.0176713	0.0300149	0.100091	0.776526	0	0.0357101	0	0.111052	0.0706125	0.215129	0.0313708	9.13517e-07	0.0175322	0.0826682	0.000516964
assembly10750_799bp	0	0.205303	0.216316	0	0	0	0	0	0.215653	0.363366	0	0	0	0	0.18802	0	0	0
assembly10751_926bp	0	0.296996	1.31861	0.287339	0	0.164819	0.153676	0	0	0	0.182182	0	0.131935	0	0	0	0.704554	0
assembly10752_1302bp	0	0.114267	4.36598e-12	0	0	1.16181e-15	0.0988666	0	0	0	3.382e-08	0.109988	0	0.104811	0	0	0.0131694	0
assembly10753_646bp	1.39307	7.9973	15.0099	9.05785	0.383211	18.1652	17.7845	0.458493	7.57022	1.06997	21.4601	5.67167	7.36524	0.000216697	6.89375	0.587473	9.21864	2.62231
assembly10754_1544bp	0.0450459	5.98035e-05	0.0413354	0.131949	0	0.100974	0.186943	0	0	0	0.623479	0	0.149914	0	0.045298	0.0261847	0.0903707	0
assembly10755_1476bp	0.0475276	0.618277	0.386157	0.148459	0	0.111009	0.202134	0	0	0	0.0640229	0	0.183539	0	0.0476362	0.0275046	0.0990795	0
assembly10756_1443bp	0	0.545663	1.35605	0.257451	0.169479	0.782343	0.891254	0	0	0	0.743968	0.196519	0.301926	0	0.516002	0	0.517097	1.14916
assembly10757_392bp	0	0	1.07125	0	0.506299	0	0	0	0	0.458325	0	0	0	0	0	0	0.467848	0
assembly10758_610bp	0	0	0.246355	0	0	0	0	0	0	0	0.145394	0	0	0.219133	0.441888	0	0.222005	0
assembly10759_305bp	0	0	0	1.6155	0	1.7438	0	1.16919	0	0	0	0	0	0	0	0	0	0
assembly1075_379bp	0	1.13924	0	0	0	0	0	0	0	0	0.669713	0	0	0	0	0	0	0
assembly10760_316bp	0	0	0	0	0	0	0	0	0	0	0	0	0	0	0	0	0	0
assembly10761_607bp	0	0	0	0	0	0	0	0	0	0	0	0	0	0	0	0	0	0
assembly10762_555bp	0	0.351784	0.360917	0	0	0.367568	0.682139	0	0	0	0	1.15298	0.576305	0	0.330199	0.184777	0	0
assembly10763_642bp	0	2.87438e-05	0	0	0	0	0	0	0	0	0	0	0	0	0	0	0	0
assembly10764_432bp	0	1.05443	0	0	0	0	0	0	0	0	0	0	0	0	0	0	0	0
assembly10765_437bp	0	0	0	0	0	1.64135	0	0	0	0	1.84906	0	0	0	0	0	0	0
assembly10766_1006bp	1.2629	1.38177	0.14416	2.25372	1.14373	1.20469	1.58586	1.7831	0.595109	0.926668	0.653922	1.04251	6.67621	3.60762	4.17819	1.59907	2.8156	1.92568
assembly10767_425bp	3.09928	0.94283	0.491868	0.430868	1.29733	0	1.72434	0.699089	0.492289	0.405846	1.58564	1.53826	1.13725	0.466326	0.433661	1.57909	0	5.54303
assembly10768_864bp	7.13962	3.39903	3.33151	2.11596	2.00117	1.18821	2.6099	3.97651	1.23162	2.96054	2.30198	1.71856	2.52931	4.05616	1.28914	3.95295	2.546	1.55407
assembly10769_697bp	2.26154	2.28758	5.71732	2.37032	3.00961	1.87606	0.000770416	5.52656	0.717194	6.84399	2.19545	5.73099	2.58043	2.91595	3.64018	5.21917	2.39113	1.80184
assembly1076_1038bp	0.874204	0.905977	0.39901	8.76859e-07	0.201354	1.01461	0	0.929142	1.16813	1.21971	0.0919266	0.085394	0.44171	0.357425	0.893043	0.409352	1.31482	0.84984
assembly10770_717bp	6.00853	2.99609	0.313395	0.29188	5.69282	2.07307	4.65887	1.53168	2.96092	2.2867	1.75868	0.26735	2.95511	3.39925	0.552699	0.938591	1.91061	0.115358
assembly10771_859bp	0.141377	0.148263	0	0.138725	0.274001	0	0.291741	0.437522	0	0.512241	0	0	0.249542	0	0	0.0826672	0	0
assembly10772_1139bp	0.60768	1.75681	2.44298	0.612003	0.117359	0.717691	0.272605	0.371443	0.302645	0.65821	1.11326	0.582872	0.674361	0.378058	0.613609	0.627862	0.866522	0.438941
assembly10773_1119bp	2.32115	2.80013	2.397	1.5014	1.4286	1.89007	3.4329	2.5273	2.62943	1.35386	3.44692	3.99673	3.02364	1.91627	1.90226	3.92199	2.56036	1.15738
assembly10774_884bp	136.858	130.988	154.995	155.689	128.945	153.87	208.783	269.006	206.721	143.993	165.148	173.755	336.687	330.128	320.885	183.701	245.86	194.531
assembly10775_659bp	3.30173	3.51112	1.4927	1.75064	0.866436	1.50028	1.85823	4.55866	2.87465	2.06594	1.1178	1.61607	1.76476	3.25749	0.88407	2.17441	2.49938	1.01206
assembly10776_1698bp	0	0.230115	1.06637	1.57906	0	1.93005	15.3376	0.400948	2.50328	0	6.91124	1.09814	5.86836	0.21503	9.53395	0.058996	14.8687	2.64577
assembly10777_594bp	0	0	0.346075	0	0	0.349181	0	0	0	0	0	0	0	0	0.319698	0	0	0
assembly10778_2070bp	68.9221	73.0037	65.3951	99.5266	109.037	91.2835	85.0947	71.3662	101.23	91.0252	105.239	102.203	113.349	86.5594	122.409	99.0399	89.0497	120.052
assembly10779_396bp	0.624363	2.04343	1.4706e-33	2.5752	0.607405	0	1.31943	0.503629	0	2.33965	4.72668	0.781553	3.36866e-62	2.05801	0	1.1819	2.55829	1.39793
assembly1077_606bp	2.10992e-20	0.650375	0	1.42904e-26	2.02281e-17	4.96299e-23	0	1.85563e-39	2.27124e-49	8.98946e-24	0	0	4.96931e-54	4.47865e-21	1.34005e-20	5.2894e-34	4.84973e-28	0
assembly10780_698bp	6.24945	2.81634	4.40445	0.819102	2.916	3.35962	1.57423	3.69596	0.930921	3.15257	4.97498	4.32091	1.32282	4.14562	3.3788	3.16441	3.46496	5.0472
assembly10781_839bp	0.816217	0.319399	0.325745	1.99936	2.3721e-12	0.331268	1.24487	3.27737	0.979931	2.93902e-22	0.0181846	3.02765	4.14495	0.571789	0.583028	0.892032	0.90829	0.331638
assembly10782_543bp	0	0	0	0	0	0	0.558643	0	0	0	0	0	0	0	0	0	0	0
assembly10783_394bp	0	0	0	0	0	0	0	0	0	0	0	0	0.635316	0	0	0	0	0
assembly10784_2073bp	0	0.502502	0.763826	0.15879	0	0.418138	0.881681	0	0.122637	0	0.395555	0.12312	0.141826	0	0.105179	0	0.685431	0.175142
assembly10785_422bp	0	0	0	0	0	0	0	0	0	0	0	0	0	0	0	0	0	0
assembly10786_718bp	0	0.235888	0.992389	0.221844	0	0.252461	0	0	0	0	0.568331	0	0	0	0	0	0	0
assembly10787_573bp	0	1.12207	0	0	0.474403	0.595464	0	1.07832	0	0.42563	0	0	2.75843	0.967275	1.55617	1.06399	2.13189	0
assembly10788_1963bp	12.196	11.6027	9.68008	13.265	11.3057	11.7755	10.7846	10.4658	7.34884	11.3897	9.56287	8.03999	8.87904	12.9564	8.66717	11.3918	10.3544	11.0243
assembly10789_1061bp	26.5114	30.0936	20.991	34.0497	27.1747	33.0198	30.6796	30.7267	23.4596	30.7716	27.7979	26.0578	24.4529	35.2203	22.6972	28.323	35.5026	21.9506
assembly1078_893bp	2.94033e-15	0.916858	0.656831	0.984367	0.26664	0.362273	0	0.000692816	0.0180339	0.152001	0.102675	0.0959275	0.81892	0.800989	0.00108356	0.211225	2.38731e-15	0.861077
assembly10790_1053bp	181.021	203.779	194.104	180.565	126.234	197.316	226.85	213.549	249.491	139.233	178.657	215.701	316.049	196.81	201.096	165.739	197.294	153.692
assembly10791_309bp	2.006	0	0	0	0	2.37593	4.29002	6.89638	0	0	2.65426	4.69362e-25	3.87892	2.28678	6.80031	2.63319	0	0
assembly10792_558bp	19.6549	25.3854	28.886	22.5951	18.4291	19.5298	17.0826	19.9342	24.9431	27.8915	23.2174	17.0288	17.7642	19.6786	25.6093	20.9872	22.7815	18.5308
assembly10793_393bp	20.856	38.3202	28.2203	21.7316	21.5192	19.1678	39.5318	32.3854	34.8205	29.9401	34.2114	21.8472	35.1109	41.6683	31.5359	19.0665	46.2051	24.3996
assembly10794_428bp	0	0	0.644516	0	0	0	0	0	0	0	0	0	0.257822	0	0	0	0	0
assembly10795_1588bp	1.77025	1.64154	2.10377	2.73645	1.71251	2.1023	3.4174	2.86832	4.62296	1.86484	3.68099	1.07313	2.72267	2.08494	2.38686	1.77708	1.99511	0.910031
assembly10796_301bp	3.07124	0	1.77036	0	1.43316	0	3.32051	3.86132	0	1.39897	0	0	1.45542	0	0	2.92514	0	0
assembly10797_397bp	0.902898	1.11733	0	1.03021	0	3.55685	0	0	0	1.6436	0	0	3.56788	0.921935	0	1.63682	3.22671	0
assembly10798_748bp	0	0.394059	0	0	0	0	0	0	0	0	0	0	0	0	0	0	0	0
assembly10799_418bp	0	0	0	0	0	0	0	0	0	0	0	0	0	0	0	0	0	0
assembly1079_1820bp	58.2581	53.0316	54.7087	71.2697	72.7459	61.7049	56.8658	64.1309	54.9574	52.5384	47.8236	63.2433	53.5735	65.5637	49.7157	58.8317	52.2768	55.5388
assembly107_380bp	0	0	0	0	0	0	0	0	0	0	0	0	0	0	0	0	0	0
assembly10800_616bp	0.896309	0.3266	0.682551	2.10232	0.870367	1.36954	5.44494e-23	0.912937	1.3927	1.64042	1.14723e-51	0.720925	1.09735	1.86382	0.301944	0.700148	0	0.337682
assembly10801_306bp	0	0	0	0	0	3.57334	0	0	0	0	0	0	0	2.94492	2.31001e-45	1.5137e-27	0	0
assembly10802_332bp	0	0	0	0	0	0	0	0	0	0	0	0	0	0	0	0	0	0
assembly10803_395bp	0	0	0	0	0	0	0	0	0	0	0	0	0	0	0	0	0	0
assembly10804_345bp	0	0	0	1.08549e-90	0	0	0	0	2.94925e-87	0	5.76721e-72	0	0	0	0.755403	0	0	0
assembly10805_313bp	0	0	0	0	0	0	0	0	0	0	0	0	0	0	0	0.353175	0	0
assembly10806_2166bp	0	0.872571	1.68124	0.850553	0.0615788	0.729017	1.05013	0	0.453347	0.0568683	1.10979	0.502728	0.280263	0	0.512068	0.0721767	0.944867	0.290299
assembly10807_453bp	0	0	0	4.39022	1.65941	3.87675	0	1.35569	2.77874	1.96173	1.20592	0	0.835148	2.24362	0.971569	1.80788	2.99557	2.22207
assembly10808_345bp	0	0	0	0	0	0	0	0	0	0	0	0	0	0	0	0	0	0
assembly10809_366bp	0	0	0	0	0	0	0	1.68391e-62	0.782927	5.45301	2.53637	1.67135	1.77997	2.13614	1.33113	0.408647	3.45652	0
assembly1080_1273bp	392.76	434.417	456.08	447.993	349	515.011	378.777	341.286	404.002	345.634	350.875	406.027	323.005	357.859	270.708	381	379.205	380.063
assembly10810_662bp	0	0	0	0	0	0	0	0	0	0	0	0	0	0	0	0	0	0
assembly10811_466bp	1.46954	0.973378	3.16751	9.39454e-64	1.77223	0.386594	0	1.42154	6.51828e-32	0.991062	0.880413	1.72467	1.28207	1.59006	3.08954e-25	0.855555	2.8967	2.04313
assembly10812_716bp	0	0	0	0	0	0	0	0	0	0	0	0	0	0	0	0	0	0
assembly10813_764bp	0	0	0	0	0	0	0	0	0	0	0	0	0	0	0	0	0	0
assembly10814_490bp	0	0	0	0	0	0	0	0	0	0	0	0	0	0	0	0	0	0
assembly10815_565bp	0	1.79575	3.47468	0	0	1.35829	1.44478	0	0.807158	0.220466	2.92633	0.284648	2.22539e-24	0	0.493091	0	3.64474	0
assembly10816_622bp	4.82997	2.06868	1.05385	1.00277	0.408848	2.24497	3.0724	4.58029	12.2774	9.47481	1.21449	5.58895	3.81564	5.43267	5.73982	13.9455	1.99197	2.29275
assembly10817_711bp	0	0	0	0	0	0	0	0	0	0	0	0	0	0	0	0	0	0
assembly10818_849bp	0	0.139261	0	0	0.26211	0.441881	0.264292	0.104736	0.147761	0.244688	0.80949	0.302094	0.343003	0.277469	0.131347	0.533639	0	0.283653
assembly10819_2819bp	0.483282	1.38101	2.05516	0.642445	0.384045	1.04953	0.807497	0.262326	0.516115	0.396267	1.31199	0.221805	0.352184	0.451822	0.583805	0.505617	1.00599	0.216623
assembly1081_1093bp	1.04544e-40	8.06363	11.2616	1.99883	0.402179	3.11579	2.91153	0.206343	1.78206	0.240737	4.63797	1.53041	1.46691	0.139207	1.82205	0.152907	3.99794	1.60618
assembly10820_384bp	0	0	0	2.39021	0	1.82227	3.45666	0	0	0	0	0	0	0	2.49744	1.8812	2.5167	0
assembly10821_874bp	0.125122	0.263022	0.698347	1.53809	1.1368	0.816067	0	1.07451	0.278398	0.452115	0	0.422749	0.217946	1.0571	0.24125	0.799518	0.360433	0.94223
assembly10822_857bp	0	0.316155	0.340136	0	0	0.163193	0.910997	0	0.166999	0	0	0.511619	0.13605	0	0.304506	0	0	0
assembly10823_1036bp	0	0	0.223865	0	0	0	0	0	0	0	0.122312	0	0	0	0	0	0.193824	0
assembly10824_521bp	0	0	0	0	0	0	0	0	0	0	0	0	0	0	0	0	0	0
assembly10825_444bp	0	0	0	0	0	0	0	0	0	0	0	0	0	0	0	0	0	0
assembly10826_386bp	0	0	0	0.474442	0	0	0	0	0.566024	0.476994	0	0	0.445393	0	0	0.640633	1.47783	0
assembly10827_590bp	0	0.520422	0.54435	0.500426	0	0.561803	0	0	0.576246	0.406889	1.78605	0	0	0	0	0.266511	2.387	0.566823
assembly10828_435bp	0	0	0	0	0	0	0	0.359051	0	0	0	0.501452	0	0	0	0	0.416201	0
assembly10829_309bp	0	0	0	9.55942	14.6019	3.5062	0	0	0	0	0	0	1.32573	0	3.15528	0	6.28791	0
assembly1082_411bp	0.607357	6.47541	16.725	4.10204	0.567105	2.3197	3.13769	0.0011707	0.894631	0	6.87852	3.6209	0.448078	3.77866	0.701127	0	4.30906	0.671205
assembly10830_390bp	0	1.00601	0	0	0	0	0	0	0	0	0	0	0	0	0	0	0	0
assembly10831_503bp	0	0	0	0	0	0	0	0	0	0	0	0	0	0	0	0	0	0
assembly10832_520bp	1.59033	0	0	0.868622	0	0.974213	0	0	0	6.7757	1.0623	0	0	1.64853	0	4.34345	0.893094	0
assembly10833_468bp	0	0	0	0	0	0	0	0	0	0	0	0	0	0	0	0	0	0
assembly10834_600bp	4.25167	3.10527	2.4232	1.61885	2.32252	2.15292	1.97581	2.22449	1.38938	3.28211	3.87778	3.18608	6.40268	1.71957	3.10701	2.49953	3.93837	2.67776
assembly10835_398bp	1.74471	0	0	0.403325	0.436635	0.156915	0.829687	0.737847	0.953474	1.66045	1.03085	0.519445	1.12561	3.4132	0.860333	1.36014	0.420136	0.503702
assembly10836_348bp	0	0	0	0	0	0	0	0	0	0	0	0	0	0	0	0	0	0
assembly10837_414bp	0	0	0	0	0	0	0	0	0	0	0	0	0	0	0	0	0.518891	0
assembly10838_601bp	3.93221	0.807913	3.38578	2.19558	6.86346	2.98139	2.33402	1.96339	1.31169	4.30803	4.7098	4.85836	1.63757	2.61669	1.4825	2.72679	3.46996	2.52942
assembly10839_380bp	0	0	0.919868	0	0	0	0	0.624269	0	0	0	0	0.728672	0	0	0	0	0.941335
assembly1083_1990bp	0	0.155619	0.164995	0	0	0.0402968	0	0	0	0	0.090463	0	0.0325702	0	0	0	0.107136	0
assembly10840_563bp	0.443528	0	0	0	0	0	0.426138	0.176422	0.476508	0.203991	0	0.495475	0.185173	0.235449	0.859509	0.391097	0	0
assembly10841_429bp	0	0	0	0	0	0	0	0	0	0	0	0	0	0	0	0	0	0
assembly10842_666bp	14.0311	10.8735	3.80551	0.659574	3.2629	10.8749	1.4179	4.47953	2.38161	13.7352	1.90962e-23	2.7122e-54	0.612657	8.12354	1.67513e-35	11.0614	1.49432e-50	2.94997
assembly10843_376bp	2.23164	1.41413	4.34258	1.2918	3.1828	1.46052	5.47639	5.22991	0	1.01716	3.25051	4.74576	1.1338	1.18677	3.89895	4.02183	3.97833	0
assembly10844_341bp	0	0	0	0	0	0	0	0	0	0	0	0	0	0	0	0	0	0
assembly10845_572bp	26.9809	13.1039	16.9749	27.1955	76.9722	33.7432	10.9265	38.4188	24.784	29.5834	18.7356	15.5309	25.0448	32.3851	31.069	29.074	20.6343	29.3276
assembly10846_476bp	0	0	0	0	0	0	0	0	0	0	0	0	0	0	0	0	0	0
assembly10847_414bp	0	0	0	0	0	0	0	0	0	0	0	0	0	0	0	0	0	0
assembly10848_606bp	0.224741	1.19584	0.756757	0.671116	0	2.02952	1.37637	0.353978	0.523089	0	0.279313	0.268263	0.809119	0.937128	0.916402	0.263933	0.688906	0.505936
assembly10849_565bp	0	0	0	0	0	0	0	0	0	0	0	0	0	0	0	0	0	0
assembly1084_1058bp	0.360423	2.70216	0.649827	0.619514	0.542163	0.22019	2.95023	3.76022	1.06944e-14	3.02291e-17	2.20766e-08	0.0219826	1.5248e-14	1.52362	3.63662e-18	0.961764	0.503949	2.11771
assembly10850_305bp	0	0	0	0	0	0	0	0	0	0	1.36649e-25	0	0	0	0	0	0	0
assembly10851_692bp	0	0	0	0	0	0.254792	0	0.17826	0	0	0	0.267422	0.404977	0	0	0.133757	0	0
assembly10852_1066bp	0.22798	0.264311	0.273907	0	0	0	0.522052	0	0	0	0.307518	0.284938	0	0	0	0	0	0
assembly10853_368bp	0	2.95765	3.00503	0	0	4.11141	1.81376	0	0	0	4.61222	1.12189	0.785929	0	1.8032	0	7.36921	0
assembly10854_338bp	0	0	0	0	0	0	0	0	0	0	0	0	0	0	0	0	0	0
assembly10855_352bp	2.48548	0	0	1.45274	5.68136	1.64422	0	1.86411	0	2.20218	1.80788	0	1.22063	2.54242	0	1.45963	3.02192	3.4055
assembly10856_307bp	0	0	0	0	0	0	0	0	0	0	0	0	0	0	0	0	0	0
assembly10857_330bp	0	0	0	0	0	0	0	0	0	0	0	0	0	0	0	0	0	0
assembly10858_675bp	0	0	0	0	0	0	0	0	0	0	0	0	0	0	0	0	0	0
assembly10859_380bp	0	0	0	0	0	0	0	0	0	0	0	0	0	0	0	0	0	0
assembly1085_1136bp	16.3505	13.5048	12.0243	16.5609	19.881	14.777	12.5913	13.5351	15.6458	16.4778	13.806	16.0305	12.8425	21.319	13.8761	16.4262	14.0154	21.3687
assembly10860_502bp	0	0	0	0	0	0.635608	0	0	0.644005	0	0	0	0	0.543216	0	0.318973	0	0
assembly10861_411bp	0.677106	2.23592	0	0	1.32157	0.7962	0	2.68571	1.605	0	0	0.854794	0.624324	0	0	2.00899	0.708343	0
assembly10862_514bp	0.574472	0	0.791388	0	0	0	1.51567	0	0	0.524756	0	0	0	0.578811	2.73819	0.341551	0	4.2745
assembly10863_1601bp	6.77757	5.81546	5.84676	6.53412	4.59516	4.02409	7.37027	5.15079	6.6668	7.20087	7.85089	7.93396	4.95123	5.22602	7.28126	6.59539	5.00085	5.20131
assembly10864_538bp	11.7364	7.02462	9.1413	7.73238	9.47821	8.76665	8.01309	10.8328	7.82503	11.5485	11.0246	8.40863	6.69651	13.5407	8.38941	13.2999	7.84541	6.07665
assembly10865_332bp	0	0	0	0	0	0	0	0	0	0	0	0	0	0	0	0	0	0
assembly10866_452bp	0	0	0	0	0	0	0	0	0	0	0	0	0	0	0	0	0	0
assembly10867_1184bp	17.1936	15.341	11.0464	12.9423	14.1806	9.23621	14.1581	16.5974	10.8267	18.3633	13.7478	14.687	10.5259	12.7761	15.6638	18.038	9.64806	15.163
assembly10868_1341bp	28.428	21.333	28.0954	31.9399	31.1512	37.1364	27.8797	30.6103	33.0244	28.459	23.3346	22.0769	29.0965	37.6081	23.5758	29.0187	23.2881	18.1018
assembly10869_312bp	29.7156	27.2664	19.6759	60.9224	40.0571	60.1961	52.0786	29.3963	42.8429	54.3917	39.768	42.5493	54.0138	42.5132	69.6516	30.5313	49.5328	46.9193
assembly1086_1164bp	2.87092	4.71377	7.96674	7.78963	3.90282	7.36698	4.30897	2.18512	1.20501	2.33105	7.10656	2.67397	1.68891	3.31716	1.55178	2.91157	5.90963	3.43351
assembly10870_673bp	0	1.59833	2.17135	0.654448	0	2.4626	0.441429	0	0.498947	0	2.09984	0	0.760072	0	0	0	1.09892	0.712605
assembly10871_1073bp	12.626	9.81513	8.01557	27.6786	46.8043	24.389	2.97962	11.4247	4.84038	11.5592	4.08663	4.36558	4.39464	19.5981	11.3018	7.72478	20.1092	4.31893
assembly10872_1237bp	20.1244	15.1421	17.4944	18.9317	21.835	18.7027	15.7346	20.2744	11.5198	18.8829	17.9599	19.7651	14.0537	18.4887	12.8331	17.8421	15.884	16.8419
assembly10873_1891bp	0	0.297813	0.389646	0.424586	0.64607	0.320966	0.881402	0.109186	0.0822827	0	0.521465	0	0.0641768	0.0745664	0.0719201	0.0406038	0.77334	0.236301
assembly10874_574bp	2.71295	2.60918	1.15954	0.659607	0.645706	0	2.88808	1.05177	2.42885	3.92659	5.60484	4.45415	1.53907	1.70496	2.38688	2.96346	2.78293	3.89788
assembly10875_516bp	0	0	0	0	0	0	0	0	0	0	0	0	0	0	0	0	0	0
assembly10876_437bp	4.22513	0.909777	0.943832	0	2.86843	0.976625	5.27358	0.568996	0	2.61076	0	0	0	0.745808	0	1.30849	1.65097	0
assembly10877_392bp	1.0033	0	0	4.36068	12.1761	2.43758	0	0.824467	1.27035	5.67751	0	0	2.01849	6.48019	6.66089	1.22713	1.14004	1.24952
assembly10878_411bp	6.78629	5.47827	3.40014	0	0.962063	3.40314	0	7.0896	0	6.46309	0	4.91502	3.70756	2.04049	7.37782	5.33175	3.1527	3.53995
assembly10879_429bp	0	0	0	0	0	0	0	0	0	0	0	0	0	0	0	0	0	0
assembly1087_818bp	0	0.215721	0	0	0	0	0	0	0.6897	0	0	0	0	0	0	0	0	0
assembly10880_315bp	0	0	0	0.672995	0	0	0	0	0	0	0	0	0	0	0	0	0	0
assembly10881_397bp	1.92509	0.727324	0	0	0.602688	0	2.70019	0.519093	1.51078	1.72695	0.832257	1.60953	0.575485	0.669642	0	2.31774	0.679722	0.758549
assembly10882_1181bp	0	1.41073	0.734005	0.214143	0	0.244133	0	0	0	0	0.271782	0	0.385416	0	0	0.11276	0.219458	0
assembly10883_407bp	0	0	0	0	0	0	0	0	0	0	0	0	0	0	0	0	0	0
assembly10884_456bp	0.339797	0.980679	0	0.300045	0	0	0	0.267056	0	0	0	0	0	0	0	0.201135	0.300746	0
assembly10885_1648bp	0	0	0	0	0	0.118759	0	0	0	0	0	0	0	0	0	0	0	0
assembly10886_362bp	0	0	0	1.95102e-57	2.79298e-60	0.60536	1.42766e-42	0.889298	0	0.50882	0.683256	5.45263e-53	7.70136e-61	0.608255	8.80433e-54	0.341749	4.43084e-70	8.74459e-56
assembly10887_365bp	0	0	3.39865	0	0	0	0	0	0	0	0	0	0	0	0	0	0.798541	0
assembly10888_555bp	5.12476	6.09687	4.89284	11.185	7.10773	10.5374	3.24897	7.99701	14.5522	5.45519	6.28526	5.58178	7.51272	10.7757	8.439	6.77535	5.9649	8.2619
assembly10889_2353bp	0.045639	0.47839	0.4038	0.0454246	0	0.205181	0.365887	0.0717244	0.0519138	0.168189	0	0.15481	0.0807864	0.0486068	0.0454836	0.0527256	0.22321	0.0495883
assembly1088_588bp	0	0	0	0	0	0	0	0	0	0	0	0	0	0	0	0	0	0
assembly10890_597bp	0	0	1.09525	0	0	0.549934	0	0	0	0	0	0	0	0	0	0	0	0
assembly10891_575bp	0	0	5.28694	0	2.50621	0	0	2.95993	0	0	0	1.83591	0	1.27636	1.53356	2.22342	0	1.87799
assembly10892_2323bp	4.4199	6.22499	4.93803	4.51745	2.82966	5.58055	4.03103	6.00669	9.98777	3.55439	2.84897	2.26945	5.6835	7.31445	4.84909	6.9812	6.73076	4.37103
assembly10893_658bp	0	1.11562	1.33316	0	0	0.165391	0	0	0	0	0	0	0.133925	0	0.150552	0	0.147127	0
assembly10894_740bp	0	0	0	0	0	0	0	0	0	0	0	0	0	0	0	0	0	0
assembly10895_399bp	43.5783	33.025	28.4264	35.3588	51.5814	30.699	21.6906	51.0527	27.2543	60.982	39.3484	34.9364	15.8338	25.1952	28.9647	37.0547	34.0413	38.1461
assembly10896_834bp	0	0	0	0	0	0	0	0	0	0	0	0	0	0	0.4335	0	0	0
assembly10897_317bp	0	0	0	0	0	0	0	0	0	0	0	0	0	0	0	0	0	0
assembly10898_420bp	0	0.360585	1.8888	0	0.684328	0	0.664535	0	0	0	1.6161	0.388618	0.596884	0	0.339588	0	0.969732	0
assembly10899_755bp	0	2.20101	1.54854	0.4493	0	1.04093	0.474652	0	0.267685	0	2.60412	0.266091	1.00509	0.23547	0.23011	0	0.222439	1.05566
assembly1089_1183bp	0	0.336946	0.234018	0.106484	0	0.364661	0	0	0	0	0	0	0	0.10849	0.105781	0	0.21108	0
assembly108_368bp	0	0	0	0	0	0	0	0	0	0	0	0	0	0	0	0	0	0
assembly10900_325bp	0	2.00973	0	0	0.94392	1.00967	0	0	0	0.906138	1.14262	0	0.864042	0	0	0	0	0
assembly10901_784bp	6.61065	7.90207	4.64803	2.89902	2.13498	3.87153	5.65518	6.74725	6.81886	6.81582	4.62749	7.76662	4.05551	6.18332	3.02003	5.61541	4.57469	1.88357
assembly10902_1070bp	0.175133	0.625379	0.567224	0.158861	0	0.641703	0	0.408706	0.188829	0.0786206	0.723313	0	0.588029	1.07033	0.0813935	1.09639	0.497653	0
assembly10903_461bp	0	0	0	0	0	0	0	0	0	0	0	0	0	0	0	0	0	0
assembly10904_377bp	0	0	0	0	0	0	0	0	0	0	0	0	0	0	0	0	0	0
assembly10905_477bp	17.0214	5.62963	4.19293	6.76252	13.7576	11.9191	7.70836	18.9203	6.21105	27.0671	14.8689	16.8932	10.739	20.9173	8.66192	21.1876	6.91454	9.44554
assembly10906_442bp	0.299284	0.290531	0	0	0	0	0	0.470544	0.616702	0.278439	0	0.668398	0	0	0	0.178958	0	0
assembly10907_419bp	0	6.26992	6.72545	1.03466	0	2.75026	0.999572	8.3753e-25	0.564688	6.21907e-25	6.69372	2.10021	2.61473	0	0.511935	2.50286e-61	4.01509	1.74734
assembly10908_1554bp	0	0.214349	0.227932	0	0	0.302844	0.140562	0	0	0	0.253719	0	0	0	0	0	0.267024	0
assembly10909_349bp	0	0	0	0	0	0	0	0	0	0	0	0	0	0	0	0	0	0
assembly1090_997bp	0	0.447058	0.629382	0.138559	0	0	0	0	0	0	0	0	0	0	0	0	0.281192	0
assembly10910_363bp	0	0	0	0	0	0	0	0	0	0	0	0	0	0	0	0	0	0
assembly10911_2909bp	0	0.0834656	0.265489	0.190996	0	0.219033	0	0.0318917	0.137229	0	0.048519	0	0.142601	0.0847699	0.0396579	0	0.392483	0.0431093
assembly10912_361bp	31.7077	30.7779	32.58	36.245	24.252	34.0376	34.985	30.1804	39.8253	31.2281	42.998	48.2604	32.7073	32.7804	38.856	32.9316	38.9233	38.291
assembly10913_381bp	0	0	0	0	0	0	0	0	0	0	0	0	0	0	0	0	0	0
assembly10914_397bp	0	1.42975	1.59445	0	0	1.02522	0	0	0	0	2.86943	0	0.413983	0	0	0	0	0
assembly10915_457bp	0	0	0	0	0	0	0	0	0	0	0	0	0	0	0	0	0	0
assembly10916_445bp	2.1736	4.76216	3.86468	1.8121	0.741885	3.06122	1.86267	3.51017	2.09649	2.67776	1.0852	0	0.74776	1.50357	3.46974	5.67418	1.8357	0
assembly10917_672bp	1.85712	1.92796	4.67043	4.5025	7.12035	5.0616	6.58117	7.16055	5.23473	2.61865	4.50701	4.28897	12.3653	8.99756	21.2892	4.67353	6.47509	3.85388
assembly10918_1960bp	0	0.0702944	0.596124	0.0647772	0	0.371546	0.700552	0	0.0770145	0	1.06997	0.152193	0.355928	0	0.261557	0	0.926241	0.0751397
assembly10919_2912bp	44.7741	36.7061	31.7073	29.1482	34.751	29.4708	32.7724	33.0519	28.1397	40.8126	39.6716	37.5186	19.3413	28.3142	31.4821	36.02	26.2549	24.9407
assembly1091_667bp	0	1.80269e-58	5.17479e-06	0.21417	0	1.26723e-08	1.36572	0.512566	0.506702	0	0.0174451	0	0.390863	0	0	0	0	0
assembly10920_305bp	0	0	0	0	0	0	0	0	0	0	0	0	0	0	0	0	0	0
assembly10921_666bp	0.504428	0	0.542588	0	0.991777	0.27023	0	0.783769	0	0.46253	0	0.285352	0.846649	0.260564	0.957812	0.292802	0.240213	0.258227
assembly10922_479bp	0.301486	1.2715	0.669161	1.15386	1.11451	0.669622	0	1.16191	0.703174	0.819089	1.52918	0	1.30223	1.25532	0.294978	1.2421	1.50555	1.36282
assembly10923_381bp	13.7264	11.039	11.1838	6.93421	11.2209	22.5385	5.13104	8.63326	5.40408	6.67993	12.9512	17.2261	6.57418	7.55373	19.0676	12.8129	3.57003	10.0409
assembly10924_421bp	22.3012	14.7358	10.3734	33.741	68.0101	25.9911	26.8747	19.669	14.9549	27.4128	18.5519	16.1754	35.3305	24.6604	46.6297	22.2396	17.5831	35.483
assembly10925_817bp	0	0.115302	0	0.319325	0	0.120948	0	0.366594	0.490338	0	0	0	0.185182	0	0	0.135401	0.107341	0
assembly10926_366bp	0	0	0	0	0	0	0	0	0	0	0	0	0	0	0	0	0	0
assembly10927_407bp	0	12.1889	12.0661	0	0	2.44438	0	0	0.82962	0	0	3.72628e-41	1.89272	0	0	0	2.95594	0.805477
assembly10928_375bp	0	0	0	0	0	0	0	0	0	0	0	0	0.447426	0.534563	0	0.607896	0	0
assembly10929_511bp	0.33966	0	1.14794	1.35173	0.342888	0.774809	0	0.272463	0.387439	0.627776	1.29781	0.819085	0.304225	0.358354	0.342489	0.811515	0.706868	0.38257
assembly1092_1287bp	0.271276	0	3.19165e-06	0	0	0.151141	0	0	0.161305	0	1.01492e-05	0	5.91859e-20	0	0	0	0.134519	0
assembly10930_579bp	10.9015	6.392	3.75641	5.9788	2.59591	1.47365	2.61831	5.86988	3.49619	10.5227	4.62876	4.9783	1.91269	8.56718	5.20156	8.06575	2.15694	1.39518
assembly10931_885bp	14.5468	16.0225	14.2882	12.0149	8.50293	13.0506	19.4407	16.453	13.2018	13.5095	11.4491	18.8328	13.487	16.5685	11.9152	18.1171	17.8566	22.9094
assembly10932_536bp	0	0.135117	0	0	0	0.850982	0	0	0	0	0	0	0	0	0	0	0.253341	0.140051
assembly10933_470bp	0	0.158979	0	0	0	0.00367286	0	0	0.344196	0	0	0	0	0	0	0	3.71537e-18	0.164154
assembly10934_666bp	0	0	0	0	0	0	0	0	0	0	0	0	0	0	0	0	0	0
assembly10935_353bp	0	0	0	0	0	0	0	0	0	0	0	0	0	0	0	0	0	0
assembly10936_348bp	0	0	0	0	0	0	0	0	0	0	0	0	0	0	0	0	0	0
assembly10937_1385bp	43.8154	48.441	42.2357	47.0668	41.9855	49.4461	38.1563	48.527	43.8915	42.5668	43.1997	42.2188	54.1692	50.2313	50.0956	56.4599	50.1166	39.3155
assembly10938_478bp	0	0	0	0	0	0	0	0	0	0	0	0	0	0	0	0	0	0
assembly10939_397bp	3.07432	2.12909	2.78721	7.91854	2.94481	2.19113	2.946	3.76179	3.40151	2.87365	6.20459	3.07014	1.93448	1.61303	2.02243	2.85696	6.56398	2.77056
assembly1093_960bp	0	0.1848	0.00671284	0	0	0	0	0	0	0	7.714e-08	0	0	0	0	0	0.0533234	0
assembly10940_588bp	1.15963	3.46977	1.28046	0	0	0.329793	1.2087	1.12646	1.34377	1.58722	1.09946	1.71521	0.255504	0.306592	0	1.1748	1.18267	0
assembly10941_500bp	0.529463	0	0	0	0	0.588164	0	0	0	0	0.324001	0	0	0	0.26429	0	0	0
assembly10942_878bp	0	0.230079	0.249129	0	0	0.360635	0	0	0	0.107365	0	0	0	0	0	0	0.430152	0.242108
assembly10943_480bp	1.28194	1.6976	0.918304	1.1537	0	2.64598	0	0	0.464828	0	0.496695	0	1.06747	0	0	0.477642	0	0
assembly10944_779bp	5.3247	6.18196	4.45085	6.37363	2.68382	7.71436	6.86056	5.41035	5.42772	3.35433	13.063	7.94916	17.474	12.2692	11.6589	6.67934	8.4872	3.75609
assembly10945_384bp	0	1.95823	0.68734	0	0	0	0	0	0	0	0	0	0	0	0	0	0.616575	0
assembly10946_708bp	42.3077	47.3387	43.5509	32.0369	36.0697	33.6804	40.7718	43.0047	36.5547	37.7858	47.8849	43.9242	38.6368	40.8036	39.9006	48.1861	36.9191	46.1991
assembly10947_371bp	0	0	0	0	0	0	0	6.77095	0	0	0	0	0	0	0	0	0	0
assembly10948_2411bp	0.586917	0.289762	0.37902	0.660632	1.20233	0.377806	0.423679	0.509533	0.546604	0.791532	1.60597	0.699413	0.905909	1.34791	0.667445	0.749367	0.742724	0.443758
assembly10949_883bp	17.8539	6.05277	3.1651	7.24178	11.8355	6.36798	10.1181	2.4597	35.1885	12.6838	15.7947	13.0055	2.04604	3.22598	17.4339	24.7738	3.15835	36.4255
assembly1094_1047bp	0	0.146437	0.447472	0	0	0	0	0	0	0	0.246642	0	0	0	0	0.0584854	0.0487451	0
assembly10950_403bp	0	0	0	0	1.52797	0	1.6284	1.81478	1.83393	1.41896	0	0.979513	0.707379	1.61779	0	0.936793	0.809465	1.82496
assembly10951_319bp	0	0	0	0	0	0	0	0	0	1.40352	0	0	0	0	0	0.949675	0	0
assembly10952_844bp	0	0	0	0	0	0	0	0	0	0	0	0	0.163876	0	0	0	0	0
assembly10953_532bp	17.0424	18.4623	19.6435	17.2255	35.1679	23.967	13.8635	17.2909	19.8082	20.7902	19.962	16.5107	12.7814	18.4079	16.9818	21.3977	21.4672	20.7853
assembly10954_316bp	2.58153	0	0	0	0	0	0	0	0	7.22146	0	0	0	0	0	1.65136	0	0
assembly10955_379bp	0.379229	0.391067	0	0	0.681723	0	0.73738	0.576067	0	0.332732	0	0	0.320109	0	0	0	0	0.424895
assembly10956_434bp	0	0	0	0	0	0	0	0	0	0	0	0	0	0	0	0	0	0
assembly10957_679bp	0.469768	0.540227	0.869043	0.504619	0	0.57758	0	0.548616	0.898689	0.210739	0.961057	0	0.444184	1.22386	1.50293	0.699778	0	0
assembly10958_538bp	1.30572	1.71478	1.75923	1.30947	1.045	4.60433	1.61434	2.73164	2.39011	0.941462	1.92703	1.25077	1.6495	4.26678	4.31815	2.03696	0.543143	2.30528
assembly10959_763bp	2.22191	0	1.24977	16.1578	21.6666	17.7501	0	2.23554	0	2.32964	0	0	1.61954	15.7577	3.62173	0.372445	15.9412	0
assembly1095_325bp	0	0	0	0	0	0	0	0	0	0	0	0	0	0	0	0	0	0
assembly10960_335bp	0	0	0	0	0	0	0	0	0	0	0	0	0	0	0	0	0	0
assembly10961_612bp	6.97176	2.10834	4.73557	6.13461	3.01988	3.67854	9.21201	5.59712	5.26586	7.10125	3.67226	4.98788	5.02032	3.1668	4.01688	5.50309	4.26694	3.16918
assembly10962_371bp	1.26196	0	0	0.653621	0	0.72595	0	0.501366	0.739367	0.575039	0	0.781695	0	0	0	0.387167	0	0
assembly10963_440bp	0	0	0	0	0	0	0	0	0	0	0	0	0	0	0	0	0	0
assembly10964_320bp	0	0	0.72052	0	0.562387	0	1.31885	1.02766	0	5.11675	1.58327	0.799801	3.40198	0.690622	0.659237	1.60292	1.26254	1.48021
assembly10965_390bp	0	1.35667e-48	0	1.89969	0	0	0	3.30975e-36	0	0	0	0	0	0	0	0	0.958297	0
assembly10966_466bp	0	0	0	0	0	0	0	0	0	0	0	0	0	0	0	0	0	0
assembly10967_623bp	0	0	0	0	0	0	0	0	0	0	0.900162	0	0	0	0	0	0.721081	0
assembly10968_458bp	2.65374	3.01293	0.62676	1.38893	0.532703	1.0106e-18	1.18958	1.69281	0	2.41329	1.39738	0.673194	1.02739	1.15013	1.70776	0.646993	0	0
assembly10969_364bp	0	0	0.711206	0	0	0	2.53998	0	0	0	0	0	0	0	0	0	0	0
assembly1096_412bp	0	2.0139	1.41074	0.624654	0	0	0	0.503393	0	1.7067	3.86861	0.745481	0.563711	1.32912	0	0.744481	0	2.7891
assembly10970_515bp	0	0.239156	0	0	0	0	0	0	0.251434	0.441741	0	0	0	0.261045	0	0.144319	0	0
assembly10971_1109bp	1.35814	0.200712	1.24748	1.48191	1.69528	1.05513	0.396416	1.34608	0.441156	1.23805	1.86794	0	1.96862	2.98625	2.01863	0.986231	3.01185	1.89504
assembly10972_570bp	7.02714e-21	0	3.75604e-20	0.27465	2.05741e-20	1.30184e-17	0	1.65253	2.58699e-15	5.84669e-24	0.0292952	0.323025	0.0305623	4.63531e-22	7.95144e-06	0.3193	1.03815e-15	8.65017e-05
assembly10973_344bp	0	0	0	0	0	0	0	0	0	0	0	0	0	0	0	0	0	0
assembly10974_317bp	0	0	0	0	0	0	0	1.47688	0	0	0	0	0	0	0	0	0	0
assembly10975_531bp	0	0	0	2.46575	0.810817	0	0	0.628635	1.91058	0.72901	2.04792	0	0.746529	0.828821	0	1.39569	0	0.922486
assembly10976_1253bp	0.0950279	1.01101	1.5792	0.378531	0.0956937	0.960559	1.18309	0.0744786	0.217267	0.0873011	1.16061	0.328497	0.425993	0	0.0946781	0	0.751113	0
assembly10977_579bp	0	0	0	0	0	0	0	0	0	0	0	0	0	0	0	0	0	0
assembly10978_418bp	13.9863	14.9636	12.5131	12.7689	9.73844	16.2286	7.20058	17.6629	19.6667	9.09889	11.697	9.58581	18.6619	15.8204	21.2377	18.5051	17.5075	10.0742
assembly10979_699bp	3.75187	3.09885	1.75164	2.21917	5.1634	2.51405	0.64157	2.4675	2.20279	4.28342	1.91353	4.02615	2.25129	0.977698	2.54007	2.74758	1.60983	1.36446
assembly1097_1892bp	0	0.350307	0.440603	0.0643855	0	0.000160754	0.161835	0.0476199	0.0593784	0.0137832	0.800838	0.0471362	0.111123	0.0318013	0.225241	0.00872236	0.519495	2.61972e-07
assembly10980_370bp	0	0.745341	0	0	0	0	0	0	0	0	0	0.869049	0	0	0	0	0	0
assembly10981_321bp	0.627073	0	0	0	0	0	0	0.964464	0	0	0	0	0	0	0	0.762969	0	0
assembly10982_312bp	0	0	0	0.9258	0.858355	0	0	0	0	0	0	0	0.814057	0	0	1.18619	0	0
assembly10983_501bp	0	0	0	0	0	0	0	0	0	0	0.448251	0	0	0	0	0	0	0
assembly10984_348bp	0	1.58843	0	0	0	0	0	0	0	0	0	0	0	0	0	0	0.722019	0
assembly10985_345bp	0	0	0	0	0	0	0	0	0	0	0	0	0	0	0	0	0	0
assembly10986_571bp	1.24489	0	0	0.84145	0.80565	0.949248	0	0.322161	0	0.374576	0.548913	1.04203	0	0.432969	0.426764	0.722753	0	0.480916
assembly10987_521bp	2.90708	2.13653	0	0	5.75899	0.755059	6.9941	6.8457	5.51487	5.85643	6.64907	3.89074	7.43268	4.79855	16.1867	9.31111	1.35854	3.73556
assembly10988_713bp	0	0	0	0	0	0	0	0	0	0	0	0	0	0	0	0	0	0
assembly10989_720bp	4.41498	4.07158	1.38965	2.91338	2.8356	2.81501	4.472	8.14675	4.81231	10.3657	2.59339	1.4568	7.26726	6.81268	2.10787	7.40687	5.0699	4.14551
assembly1098_1782bp	0	0.00014664	0.104608	0.0161603	0	0.119234	0.751076	0	0.0836002	0.0147797	1.36168e-11	0.0590596	2.68633e-19	0	8.01154e-22	0.00938986	3.86408e-15	0.133663
assembly10990_387bp	0	0	0	0	0	0	0	0	0	0	0	0	0	0	0	0	0	0
assembly10991_613bp	1.50986	1.38468	1.76678	1.29347	1.40667	0.589357	1.62837	0.932024	1.1908	1.98775	0	2.47461	0.678342	1.0321	0.261828	0.715181	1.06324	0
assembly10992_423bp	0	3.36568	5.72057	1.20964	0	4.87533	1.31706	0	0.724967	0	7.07464	0	1.69371	0	1.91567	0	1.24182	0
assembly10993_613bp	0	0	0.669778	0	0	0.675786	0	0	0.349194	0	0.735734	0.347004	0.814576	0.32259	0	0	0	0
assembly10994_1006bp	0	0	0	0	0	0	0.710413	0	0	0	1.95217	0.196379	5.94418	2.00499	4.09931	0	0.345396	0.589943
assembly10995_374bp	7.337	4.40818	8.65886	1.69866	8.75352	4.52785	6.04868	4.8312	8.14613	11.0325	7.45823	3.64319	6.82299	10.3717	9.11679	3.67509	4.13356	8.65757
assembly10996_1006bp	0.43074	0.330528	0	0.195098	0	0	0	0	0.347481	0	0.37485	0.591151	0.361934	0.565819	0.508376	0.366804	0.603811	0.108511
assembly10997_600bp	28.4727	29.5484	38.0886	24.9242	22.2621	24.6214	19.1328	22.806	25.3443	31.512	26.1351	26.5477	18.3999	27.2599	24.1953	27.7517	23.3533	22.1692
assembly10998_775bp	0	0.149601	0	0	0.280287	0.155288	0	0.225958	0	0.132137	0	0	0.377988	0.300432	0.139447	0.0847463	0.272609	0
assembly10999_414bp	0	1.53901	3.84265	2.45845	7.34937	4.98744	1.97639	10.9378	3.37473	1.35269	0.601511	2.32761	2.11031	4.18562	3.39856	1.47926	2.45355	3.28447
assembly1099_1719bp	0	0.000625019	0.652389	0.094097	0	0.000209578	0.302333	0	0.0968736	0.0154025	0.0834185	0.0658879	2.88842e-19	0	1.69473e-20	0.00980666	3.67265e-13	0.15618
assembly109_417bp	12.0556	9.60264	9.34079	3.80908	1.73	5.65806	7.77156	10.6683	4.5211	8.29452	2.34611	7.51142	2.76264	6.3077	6.48405	8.40202	4.42446	1.45193
assembly10_522bp	0.410779	0.42158	0	0.366245	0	0	0	0.627964	0	0	0	0	0.340795	0	0	0	0	0
assembly11000_478bp	0.929412	0.325137	0	2.95395	4.96892	0.680062	1.93141	0.988477	2.51745	4.86698	1.91984	1.50015	0.273766	2.96498	1.86417	3.70486	3.29337	11.9664
assembly11001_517bp	0	0	0	0	0	1.19499	0	0	0	0	2.62006	0	0	0	0	0	0.530676	0
assembly11002_742bp	4.45945	1.53311	0.70244	1.38668	2.70282	1.06704	1.26466	2.56189	2.70926	4.19928	2.53444	3.40121	0.841782	2.6666	1.93242	1.4746	4.34416	1.35194
assembly11003_318bp	0	0	0	0	0	0	12.1558	0	0	0	1.84587	0	0	0	0	0	1.53344	0
assembly11004_441bp	0	0	0.272641	0.235666	0	0.271021	0	0	0.275815	0	0	0	0.218915	0.589768	0	0	0	0.268602
assembly11005_788bp	0	0	0	0	0	0.359829	0	0	0	0	0	0	0	0	0	0	0	0
assembly11006_502bp	0	0	0	0	0	0	0	0	0	0	0	0	0	0	0	0	0	0
assembly11007_384bp	0	0	0	0	0	0	0	0	0	0	0	0	0	0	0	0	0	0
assembly11008_820bp	0	0.200664	0.210989	0	0	0	0	0	0	0	0.232118	0.219413	0	0	0	0	0	0
assembly11009_412bp	0.314251	1.27933	1.34908	0.299601	0	0.339636	1.20967	1.01028	1.04273	0.566134	1.09926	1.0785	0	0.661896	0.614222	0.573307	0.873285	0
assembly1100_1955bp	0	0.0854159	0.0795829	0.012409	0	0.0867114	0.473716	0.0449026	0.0521169	0.0132596	1.46288e-10	0.042784	0.0989392	0.0306591	0.011824	0.00839691	0.00567494	2.3735e-07
assembly11010_541bp	0	0.769785	1.60186	0.229175	0	1.03084	0	0.19269	0.55286	0	1.80487	0	0.214753	0	0.241173	0	0.728614	0
assembly11011_338bp	0	0	0	0	0	0	0	0	0	0	0	0	0	0	0	0	0	0
assembly11012_517bp	3.58353	0.584081	2.98935	1.63798	2.03162	4.91103	3.3457	3.21888	3.85252	1.44616	2.72829	1.28554	2.89793	2.16711	2.64812	2.39159	1.64653	3.03736
assembly11013_736bp	0	0	0	0	0	0	0	0	0	0	0	0	0	0	0	0	0	0
assembly11014_566bp	5.571	1.13293	1.19597	0	0.968517	0	2.2143	2.99404	0	4.41028	1.32363	0	2.83957	0.978237	0	2.2237	0	3.51387
assembly11015_375bp	0	0	0	0	0	0	0	2.50089	0	0	0	0	0	0	0	0	0	0
assembly11016_451bp	1.02308	0	2.66496	0	5.09108	2.78727	0	3.16846	0	3.70712	0	0	1.0387	1.02789	0	2.37251	1.21419	2.72279
assembly11017_710bp	57.3752	46.4802	52.8789	38.8133	37.9242	36.8181	44.3704	56.0556	45.1418	64.6517	51.5344	54.6654	38.0679	56.8659	44.1971	56.8196	46.0796	42.6674
assembly11018_396bp	0	0	0	0	0	0.775038	0	0	0	0	0	0	0	0	0	0	0.702322	0
assembly11019_1142bp	0	0.591428	0.831056	0	0	0.207481	0.571588	0	0.428945	0	0.567981	0.107995	0.166715	0	0.0936202	0.0541398	0.637276	0
assembly1101_846bp	0.754241	0	1.17179	0.767164	0.906112	0.523053	0.611096	0.240418	1.38316	0.558588	0.184889	0.172276	0.675277	0.323906	0.153755	0.444966	0.603972	0.329292
assembly11020_487bp	0.509429	0.249223	1.06051	0	0.742965	0	0	0	0.536999	0.45689	0	0.549986	0.20699	0.269755	0.479834	0.306238	1.1546	0.504341
assembly11021_471bp	14.4817	11.5393	8.68036	17.6553	8.24827	19.7129	4.99255	17.2191	11.3575	10.1052	16.1406	11.3508	12.3191	8.8544	11.8506	13.2736	8.60315	3.87174
assembly11022_340bp	0.520075	0	0	0	0	0.474489	0	0	0	0.458631	0.509515	0	0.376697	0	1.39403	0.313688	0.852477	0.445835
assembly11023_1041bp	0	0	0	0	0	0	0	0	0.293899	0	0	0	0	0	0	0	0	0
assembly11024_671bp	4.7192	1.88961	4.36393	2.96724	1.67201	1.34443	2.84402	4.68682	1.13943	2.6247	0.959141	2.29906	2.92062	4.17818	2.19031	4.29744	2.35188	2.39677
assembly11025_331bp	0	0	0	0	0	0	0	0	0	0	0	0	0	0	0	0	0	0
assembly11026_456bp	112.003	110.947	152.558	115.434	103.431	131.259	83.7613	115.239	81.7359	114.598	144.092	111.983	50.4771	96.9355	111.262	137.56	98.7875	166.61
assembly11027_628bp	0.305376	0.340073	0	0.319922	1.55527	0	0	0.489666	0	0.854889	0	0	0.29062	0	0.329609	0.180906	0	0
assembly11028_654bp	0	0	0	0	0	0	0	0	0	0	0	0	0	0	0	0	0	0
assembly11029_471bp	0.870713	0.561295	0	0	0.275392	0	0	0	0	0.259743	0.319851	0	0	0	0	0.336973	0	0.284801
assembly1102_1142bp	1.75917	7.6283e-08	8.47469e-21	0.155942	1.67097e-15	1.03756	1.92861e-17	5.40283e-05	0.00130759	0.494421	2.22439e-08	0.176294	0.0689948	3.29159e-08	0.163584	0.0870026	0.00626573	0.659951
assembly11030_369bp	0	1.02382	0	1.78776	1.80016	0	0	0	1.06276	1.77051	0	1.17408	0.871577	0	2.98228	1.16831	0	4.05957
assembly11031_341bp	1.38618	0	0	1.49186	0	3.34477	0	2.28314	0	0	1.90523	3.81547	0	0	0	0.835483	0	0
assembly11032_701bp	1.14173	1.81568	1.48304	2.45166	2.00436	1.96217	4.19226	1.14096	1.59325	2.12687	1.67583	3.83654	2.58272	3.25683	3.65663	2.21318	2.06814	2.2931
assembly11033_1520bp	7.98722	4.91677	2.01215	4.36084	3.06404	2.6754	7.15063	6.64054	3.54526	10.0752	4.13008	2.04732	2.47114	2.73701	4.37735	9.11062	1.50649	2.58459
assembly11034_448bp	0	0	0	0	0	0	0	0	0	0	0	0	0	0	0	0	0	0
assembly11035_363bp	0.50109	0.99252	3.16159	0	0	0	2.73748	0	0	0	1.69095	0	0	0	0	0.301115	0.466218	0.482374
assembly11036_631bp	33.9648	33.2037	34.9058	39.3049	37.9802	31.3231	34.2923	38.8663	29.907	32.1372	32.6546	28.6133	26.9777	34.9384	31.7881	42.5279	36.2062	31.1046
assembly11037_305bp	0	0	0	0	0	0	0	1.03308	0	0	0	0	0.4939	0	0	0	0	0
assembly11038_372bp	0	0	0	0	0	0	0	0	0	0	0	0	0	0	0	0	0	0
assembly11039_604bp	48.0582	54.4457	48.0513	50.2272	54.2323	43.2996	30.3464	57.2126	65.5018	46.4546	46.7496	49.9141	49.1277	51.2394	51.6411	62.15	46.6768	58.1352
assembly1103_1301bp	0.127971	1.43208	1.50591	0.934684	1.30766	0.915483	1.74797	1.70789	1.8988	1.68527	1.85038	1.23597	0.0608431	1.22282	1.07035	2.30219	0.929943	0.00751964
assembly11040_515bp	0	0	0	0	0	0	0	0	0	0	0	0	0	0	0	0	0	0
assembly11041_322bp	52.729	69.3004	76.6756	53.6939	34.1523	58.264	83.0513	59.7231	67.9095	58.7368	60.5348	89.7192	104.124	61.8836	60.7649	64.9823	72.4947	36.3034
assembly11042_767bp	0.51024	0	0.190011	0.32727	0.667087	0.372097	0	0.264167	0	0.457283	0	0	0.29963	0.351736	0.328054	0.0956119	0.336641	0.566298
assembly11043_633bp	0	0.406027	0	0.772344	0	0	0	0.277407	0	0.641561	0	0	0.338955	0.364569	0	0.412761	0	0
assembly11044_883bp	1.40764	4.95634	6.78546	1.72572	1.60536	2.19012	4.84244	1.83913	1.62486	1.74983	4.2667	1.62051	2.10704	1.53092	2.16657	1.01592	4.04138	1.09359
assembly11045_608bp	2.05549	0.587974	0.619184	0.559564	2.57209	0	1.17519	2.41588	0	2.80935	0.6746	0.636604	1.97816	1.63609	0.555661	2.41583	2.24736	1.25698
assembly11046_1344bp	22.7205	26.9127	25.7202	18.8534	8.37	19.5647	23.7544	18.5911	27.0382	17.617	22.5492	22.1861	24.682	16.2359	26.6234	18.0875	24.8695	19.4349
assembly11047_665bp	2.69629	3.4818	3.21419	1.02838	0.762359	1.85014	2.91187	2.17365	1.67667	0.893833	1.74704	1.89549	2.87039	1.80306	0.813167	2.22801	2.63249	1.4088
assembly11048_390bp	0	0	0	0	0	0	0	0	0	0	0	0	0	0	0	0	0	0
assembly11049_600bp	0	0	0	0	0	0	0	0	0	0	0	0	0	0	0	0	0	0
assembly1104_2877bp	0	0.283777	0.428528	0.0766638	0	0.219901	0.240255	0.0298245	0.135226	0	0.287034	0	0.0344002	0	0.0382593	0.0221576	0.152918	0.0859922
assembly11050_438bp	5.4776	4.836	0.725089	5.17076	9.3275	2.87779	0	3.53022	1.48497	1.75053	0.792252	1.56031	3.52937	1.99006	4.617	3.73431	1.33166	0.7177
assembly11051_416bp	0	0	0	0	0	0	0	0	0	0	1.9168	0	0	0	0	0	0	0
assembly11052_582bp	0	0	0	0	0	0	0	0	0	0	0	0	0	0	0	0	0	0
assembly11053_343bp	43.0547	56.3493	26.2646	53.0105	38.713	43.7107	34.4819	40.9638	37.4053	48.6648	48.4701	21.7574	70.6342	33.8566	88.5655	39.0852	39.9851	30.6815
assembly11054_1419bp	0	0.321571	0.788068	0.300261	0	0.454668	0	0	0.116835	0	1.00175	0	0.179777	0	0.100465	0	0.304967	0.108992
assembly11055_594bp	0	0	0	0.317789	0	0	0	0	0	0	0.786638	0	0.276744	0	0	0	0	0
assembly11056_365bp	2.82059	1.58318	1.66305e-50	4.54967	0.699416	4.23227	1.48946	5.23447	5.06454	1.3449	9.21106	3.62193	2.6809	3.05366	3.80162	5.38948	5.99511	6.78533
assembly11057_438bp	0	1.59751	0.812831	0.767517	0	0	0	0	0	0	0.9503	0	0	0	0	0	0	0
assembly11058_360bp	12.6823	4.16346	10.529	9.85492	10.7864	3.51174	12.4725	3.55508	17.8713	9.90854	12.4974	6.66779	4.10455	10.9461	8.60836	17.652	17.1944	24.4866
assembly11059_498bp	0	0.652421	0	0	0	0	0.621518	0.752784	0	0	0	0	0	0	0	0.556355	0	0
assembly1105_1154bp	0.121351	0.138879	0.288639	0.132065	0.124512	0.752085	0	1.0564	0.598911	0.455041	0.6443	0.148352	0.452576	1.26398	1.77468	0.283747	0.788677	1.14629
assembly11060_428bp	0	0.872484	0	1.58	2.40267e-24	0	4.22306e-25	0.54788	0.962516	1.91467	1.03361	1.94105	2.82867	2.95909	0.800647	0.416227	0	0
assembly11061_361bp	0	0	1.15108	0	0	0	0	0	0	0	0	0	0	0	0	0	0	0
assembly11062_347bp	0	0	0	0	0	0	0	0	0	0	0	0	0	0	0	0	0	0
assembly11063_433bp	0	0	0	0	0	0	0	0	0	0	0	0	0	0	0	0	0	0
assembly11064_516bp	0.28009	1.86677	1.98238	2.31413	0.737235	2.18795	3.11218	0.4209	0.293814	0.246208	2.1984	0.302474	1.09972	0.277399	2.2157	0.327323	3.90188	1.35884
assembly11065_374bp	0.7227	0	0	0.609336	0.356424	0	0	0	0.357164	0.655802	1.16863	1.53451	1.14126	1.18668	0	0.44328	0.305497	0.341867
assembly11066_388bp	0	0	0	0	0	0	0	0	0	0	0	0	0	0	0	0	0	0
assembly11067_333bp	0	0	0	0	0	0	0	0	0	0	0	0	0	0	0	0	0	0
assembly11068_651bp	0	0.652326	1.02664	0.591549	0	0	0	0	0	0	0	0	0	0	0	0	0	0
assembly11069_1460bp	54.7619	56.3508	58.4387	21.8198	15.2199	28.8202	64.367	55.8561	50.5894	34.0322	65.7761	67.7796	66.2148	60.4045	49.6555	61.3093	64.6992	45.7883
assembly1106_789bp	0.241844	0.971039	1.24834	3.00744e-22	6.84569e-15	1.51619e-13	0	1.62512e-23	0.789573	2.22339e-05	0.00352694	0.130656	0.205315	0.717796	1.04056	1.74978	1.60986	0
assembly11070_383bp	21.8372	9.50705	14.3468	25.8785	33.4022	40.0868	22.7665	23.8857	26.5775	22.2228	16.7376	18.4645	12.1095	27.8043	22.5728	30.2644	17.5021	29.5127
assembly11071_393bp	0	0	0	0	0	0.484738	0	0	1.00483	0	0	0	0	0.450582	0.877658	0	0.435988	0
assembly11072_553bp	0	0	0	0	0	0.426002	0	0	0	0	0.1998	0	0	0	0	0	0	0
assembly11073_498bp	19.6572	33.4821	29.7266	27.3213	10.3324	32.3671	49.8157	15.9082	37.1429	14.1442	48.288	30.3405	22.8697	6.79588	28.46	14.4898	37.0133	36.2655
assembly11074_481bp	0	1.47355	1.0164	0	0	2.22895e-11	0.916642	0	3.79322e-27	0	2.25288	0	0	0	0	0	0.901939	0
assembly11075_323bp	0	0	1.41945	0	0	0.697322	2.70968	0.517207	1.51121	0	0.816355	0.803262	0	0	0.689903	0	0	1.49978
assembly11076_587bp	0	0	0	0.303975	0	0	0	0	0	0	0	0	0	0	0	0	0	0
assembly11077_1018bp	1.91796	0.804221	0.421289	68.9749	190.348	16.3676	24.5479	32.4015	15.1125	7.66868	7.29738	9.5842	18.2726	22.4303	46.9366	4.37167	16.9068	95.3023
assembly11078_445bp	0.406298	0	0.472801	0	0.386562	0.946392	0.860803	0.311033	0	0.363176	0.516812	1.93452	0	0.852012	0	0	0.85683	0
assembly11079_695bp	0	0.360223	0	0	0	0	0.688618	0	0	0.562716	0	0	0.293468	0	0	0	0.332614	0
assembly1107_853bp	0.173606	2.65899e-19	0.000681537	0.390338	0.582107	0.880258	0	0.765429	0.223568	0.707619	0.703726	0.110764	3.11989	1.59745	1.27338	0.783933	0.194922	0.212871
assembly11080_326bp	1.78633	0	0	2.54572	0.869388	0	0	0	0	0	0	0	1.50883	0.973943	0	0	0	0
assembly11081_636bp	0.386961	0	0	0	0	0	0	0.567901	0	1.03757	1.10753	0.500623	1.12482	1.57157	1.25133	0.214771	1.72965	0
assembly11082_511bp	1.07763	1.26729	0	0	1.06925	1.30905	0	0.821447	0	1.00218	0	0	0	2.22797	0	0.620716	0	0
assembly11083_681bp	0	0	0	0	0	0	1.96384	1.96646	0	0.918543	0	0	6.2586	14.545	2.6703	0.293991	1.67614	1.28337
assembly11084_434bp	0	0	0	0	0	0	0	0	0	0	0	0	0.478538	0	0	0	0	0
assembly11085_573bp	0	0	3.4698	0	0	0.571074	0	0.436357	0	0	0.322451	0	0	0.572505	0	0.164325	1.01021	0
assembly11086_332bp	0	0	0	1.65805	4.34886	1.90073	3.58715	0	4.10277	0	2.00841	0	0	4.92393	0	0.95331	1.73103	0
assembly11087_792bp	2.91263	10.8128	10.4159	8.44926	2.61675	13.5287	3.52624	7.49991	16.0655	2.30403	6.16578	8.50771	7.04552	4.84573	5.39576	6.83334	7.36658	12.1514
assembly11088_503bp	0	0	0	0	0	0	0	0	0	0	0	0	0	0	0	0	0	0
assembly11089_556bp	0	0	0.498739	0	0	0	0	0	0	0	0	0	0	0	0	0	0	0
assembly1108_3572bp	7.35535	7.74984	7.74266	16.6843	16.6775	15.6014	17.927	10.4527	13.507	10.9004	20.0819	15.3474	22.5872	20.337	26.4669	13.8884	22.9884	30.091
assembly11090_304bp	9.64072	8.50176	0	3.99674	0	0	0	2.5207	9.50293	5.72527	0	9.14452	3.41776	6.9395	7.7985	3.90331	0	0
assembly11091_323bp	0	0	2.02043	0.872564	1.7588	0.976118	0	1.49864	0	0	0	0	0	0	0	0.57503	1.73845	0
assembly11092_426bp	0	0	0	0	0	0	0	0	0	0	0	0	0	0	0	0	4.24394	0
assembly11093_636bp	1.20748	0.271222	0	0.256184	1.48734	0.291498	0	0.592807	0.896218	0.45729	1.30047	0.299069	0	0.262706	0	0.575396	0	0
assembly11094_613bp	0	2.94184	1.30297	0.394684	0	1.33859	0	0	0	0.365162	0	0	0.357144	0	0	0	0	0.414413
assembly11095_356bp	0	0	0	0	0	0	0	0	0	0	0	0	0	0	0	0	0	0
assembly11096_327bp	0	0	0	0	0	0	0	0	0	0	0	0	0	0	0	0	0	0
assembly11097_305bp	0	0	0	0	0	0	0	0	0	0	0	0	0	0	0	0	0	0
assembly11098_603bp	0.653246	0.774766	1.22096	0.345931	0.334	0.805011	1.51118	1.28199	0	0	0.452751	0.834723	0	1.00727	1.0382	1.33165	0	0
assembly11099_328bp	0	0	0	0	2.39149	0	0	5.99795	0	0	0	0	0	0	0	0	0	0
assembly1109_979bp	0	0.927713	0.163662	0.0621785	0	0.0401217	0.271452	0	0.251555	0	1.41387	0	0	0	0	0	0.0105274	0.14709
assembly110_324bp	0	0	0	0	0	0	0	0	0	0	0	0	0	0	0	0	0	0
assembly11100_412bp	0.799862	2.53372	4.28875	5.45496	0	2.59164	0	0.687699	0.897948	0.777826	1.848	2.85025	3.68966	0	3.28433	1.00495	7.04455	2.54738
assembly11101_521bp	0	0.293893	0	0	0	0.311292	0.569167	0	0	0	0	0	0	0	0	0	0	0
assembly11102_826bp	0	0	0	0	0	0	0	0	0	0	0	0	0	0	0	0	0	0
assembly11103_856bp	0	1.64953	3.48927	1.10658	0	0.847447	0	0	0	0	1.9227	0.871282	0	0	0.725809	0	1.49664	0.399514
assembly11104_730bp	0	0.547791	0	0	0	0	0	0	0	0	0	0	0	0	0	0	0.517606	0
assembly11105_428bp	0	0	0	0	0	0	0	0	0	0	0	0	0	0	0	0	0	0
assembly11106_417bp	0	0	0	0	0	0	0	0	0	0	0	0	0	0	0	0	0	0
assembly11107_484bp	0	0	0	0	0	0	0	0	0	0	0	0	0.274249	0	0	0	0	0.312852
assembly11108_369bp	0	0	0	0	0	1.97759	0	0	0	0	0	0	0	0	0	0	0	0
assembly11109_365bp	0	4.12121	0	1.33794	1.04441	2.98844	0	0	0	0	0	0	0	1.11018	0	0	0	0
assembly1110_1069bp	0	0.239404	0.683152	0.0486432	0	1.10198	0.205089	0	0.148736	0	1.46296e-11	0	0	0	0	0	0.593999	0.102882
assembly11110_480bp	2.40951	2.10726	3.26535	2.04903	1.61727	1.12614	6.83277e-45	3.72571	3.58817	2.25484	1.24937	1.16754	4.25448	0.830787	2.9074	3.37237	2.04038	2.37941
assembly11111_316bp	4.91804	5.52607	8.63509	1.43607e-49	3.36565	1.44524	0	1.95535	3.00719	0	0	0	0	1.26617	2.54453	4.61647	1.28731	4.29633
assembly11112_492bp	0	0	1.88047	0	0	0.47116	0.855321	0	0	0	0.515877	0	0	0	0	0	0	0
assembly11113_326bp	0	0	0	0	0	0	0	0	0	1.78672	0	0	0	0	0	0.605001	0	0
assembly11114_324bp	0	0	6.15643	0	1.12262	5.80493	0	0	0	0	0	0	0	0	1.40819	0	1.38078	0
assembly11115_448bp	0	0	0	0	0	0	0	0	0	0	0	0	0	0	0	0	0	0
assembly11116_383bp	0	0	0	0	0	0	0	0	0	0	0	0	0	0	0	0	0	0
assembly11117_376bp	0	0	0	0	0	0	0	0	0	0	0	0	0	0	0	0	0	0
assembly11118_508bp	2.45917	0	3.96921	0	5.67625	0	0	0.623691	2.11275	5.88977	3.25588	3.09025	0.784493	1.64743	4.33522	1.88881	0	0
assembly11119_495bp	5.4632	1.57286	1.64961	2.96097	7.06234	3.84034	2.03705	2.79569	3.50647	3.26048	2.45315	1.76134	4.24629	2.73948	1.4283	5.30472	3.43729	2.78471
assembly1111_1435bp	0	1.57923	1.08589	0.388344	0.0819223	5.52985e-09	0.00134769	0.0311237	1.43969e-19	0	0.347909	0.132422	0.00264043	0.0178056	0.197257	0	0.0015295	0.139558
assembly11120_1092bp	0	0	0	0	0	0.135184	0	0	0.27375	0	1.03527	0	0.211742	0	0.121339	0	3.32343	0.657175
assembly11121_305bp	1.43415	3.14782	0	0	0	0	0	0	0	1.3237	0	0	0	0	1.55119	2.72781	0	0
assembly11122_474bp	0	0	0	0	0	0	0	0	0.424497	0	0	0	0	0	0	0	0	0
assembly11123_307bp	0	0	0	0	0	0	0	0	0	0	0	0	0	0	0	0	0	0
assembly11124_477bp	12.1944	29.9216	25.8133	17.3758	9.80913	16.6611	25.042	9.08796	21.9262	13.5784	16.7703	21.3713	22.6379	7.41469	28.2739	16.8716	19.6788	30.3135
assembly11125_473bp	0	0	0	0	0	0	0	0	0	0	0	0	0	0	0	0	0.362397	0
assembly11126_440bp	0	0	0	0	0	0	0	0	0	0	0	0	0	0	0	0	0	0
assembly11127_353bp	0	0	0	0	0	0	0	0	0	0	0	0	0	0	0	0	0	0
assembly11128_616bp	1.6893	0.472742	0	0.443799	0.440612	1.01403	0.922782	1.03107	0.512279	1.19334	1.62752	0	1.23544	0.447544	1.34992	0.762993	1.40088	0.98174
assembly11129_341bp	0	0	1.83671	0	1.50607	0	0	1.22961	0	2.79729	0	0	0	1.66343	0	1.90471	0	1.96678
assembly1112_1369bp	0	0.497386	2.30161	0.384683	0.0836184	1.06149	1.79672	0.0315756	0.45397	0	1.11888	0.135184	0.791072	0.157698	0.768274	0	1.89169	0.381291
assembly11130_363bp	0	0	0	0	0	0	0	0	0	0	0	0	0	0	0	0	0	0
assembly11131_1283bp	0	0.321715	0	0	0	0	0	0	0	0	0	0	0	0	0	0	0	0
assembly11132_619bp	0	0.740008	0	0	0	0	0	0	0	0	0.290264	0	0	0	0	0	0	0
assembly11133_610bp	0.524898	0.868338	0.307315	0	0	0	0	0.20319	0.634798	0.239477	0	0.317196	1.87658	0.276085	0.794153	1.07825	0	0.601912
assembly11134_458bp	0	0	0	0.423255	0	0	0	0	0	0	2.48108e-23	0	0	0	0.445034	0	0.439124	0
assembly11135_434bp	0.391361	0	0	0	0	0	0	3.79832	0	0	0	0	0	0	0	0	0	0
assembly11136_333bp	1.59258	0	0	0	9.11542e-50	0	3.66341	5.04079	4.12019	2.93639	0	4.63834e-45	0	3.33189	0	0.980252	3.66424	2.007
assembly11137_665bp	0	0.84122	0.216508	0.186062	0	0.635365	0	0	0.215572	0	0.234484	0	5.63326e-44	0	0.000201441	0	0.191254	0
assembly11138_408bp	0	0	0	0	0	0	0	0	0	0	0	0	0.404143	0	0	0	0.458674	0
assembly11139_319bp	0	0	0	0	0	0	0	0	0	0	0	0	0	0	0	0	0	0
assembly1113_376bp	0	0	0	1.03386	0	0	0	0	0	0	0	0	0	0	0	0	0	0
assembly11140_344bp	4.08587	0	1.78155	3.30124	2.58178	1.88917	0	2.15977	5.82838	1.19829	0	5.88501	4.32676	2.78913	0	2.46865	0	0
assembly11141_518bp	7.05173	23.2967	17.6638	30.2413	17.8067	18.3685	47.8695	17.1661	37.6525	28.7545	23.6162	35.5035	56.4301	31.4363	55.5284	17.3135	37.861	15.4012
assembly11142_1094bp	0	0	0	0	0	0	0	0	0	0	0	0	0	0	0	0	0	0
assembly11143_722bp	0	0.429451	0	0	0	0.150174	0	0	0	0	0.167368	0	0.117808	0	0	0	0.265465	0
assembly11144_333bp	0	0	0	0	0	0	0	0	0.887587	0	0	0	1.39223	0	0	0.465835	0	1.64683
assembly11145_947bp	0.188147	0	0	0	0	0	0	0	0.102649	0.0859803	0.109042	0	0	0	0	0.0543354	0	0
assembly11146_394bp	0	0	0	0	0	0	0	0	0	0	0	0	0	0	0	0	0	0
assembly11147_401bp	1.79347	0.915429	1.93705	3.48334	1.82858	1.47496	5.19607	3.66545	4.3876	3.23429	3.65932	3.11582	3.77365	2.94667	4.52013	2.98862	3.13021	6.5821
assembly11148_551bp	1.92373	1.41004	2.20946	1.71597	1.27601	1.52518	4.15733	4.80449	0	1.7845	1.65331	1.21043	4.55783	1.35506	2.08689	2.49634	0.336108	1.90582
assembly11149_651bp	0.297275	0.322981	0	0	0.303656	0.666465	0.627811	0	0	0	0	0	0	0	0	1.08102	0.614379	0
assembly1114_1237bp	0.129601	1.19497e-20	0.0352948	0.121467	0.222102	0.240193	0.0862769	0.0338087	0.0960461	0.164352	0.102898	0.0475178	0.228142	0.152753	2.96978e-14	0.216285	0.00306395	0.0892611
assembly11150_375bp	1.23048	0	0	2.23071	0	0	0	0	0	1.14652	0	0	0	0	0	0	0	0
assembly11151_369bp	1.53428	0	0	1.54703	0	0	0	0.614915	0.954436	0	0	0	0	0.809376	0	0.467659	0.806962	0
assembly11152_547bp	0	0	0	0	0	0	0	0	0	0	0	0	0	0	0	0	0	0
assembly11153_600bp	6.19789	4.80422	6.72578	18.6144	30.88	13.3378	2.54733	14.174	4.42659	10.661	3.93565	4.93401	6.14133	12.9851	4.56613	6.36267	15.1732	13.3123
assembly11154_310bp	0	0	0	0	0	0	0	0	0	0	0	0	0	0	0	0	0	0
assembly11155_301bp	0	0	0	0	0	0	0	0	0	0	0	0	0	0	0	0	0.65379	0
assembly11156_327bp	0	0	0	0	0	0	0	0	0	0	0	0	0	0	0	0	0	0
assembly11157_303bp	0	0	0	0	0	0	0	6.79222	0	0	0	0	0	0	0	0	0	0
assembly11158_446bp	0	0.891776	1.34242e-29	2.03515e-24	0.791106	2.2946	1.75177	0	0	0	0	0.502935	0.7392	0	0	0.252364	0	0.482879
assembly11159_567bp	0.249114	0	0	0	0	0	0.496877	0.375789	0.55041	0.223427	0.300559	0	0.424945	0	0	0.144818	0.236686	0.270838
assembly1115_1333bp	0.127017	0.131353	0.471621	0.121492	0.206441	0.0391408	0.0863392	0.0335266	0.0961282	0.159515	0.10271	0.0473848	0.227792	0.131033	0.187371	0.195521	0.618509	0.0892548
assembly11160_412bp	2.17681	0	0	1.1697	0	0	0	0	0	2.05481	0	1.42442	0	1.1383	7.24833	3.37844	0	0
assembly11161_581bp	5.33592	2.02585	2.92723	2.68629	3.85702	2.10881	1.50769	4.28683	5.69065	3.60477	2.84208	2.26565	3.39718	5.53645	1.91904	4.77369	3.07455	2.98059
assembly11162_629bp	0	0.566609	0	0.247453	0	0	0.556261	0	0	0	0	0	0	0	0	0	0.241814	0.152914
assembly11163_428bp	0	0.740965	1.91002	0	0	2.62165	0	0	0.394498	0	0.420569	0	0	0	0.697682	0	1.69712	0
assembly11164_590bp	0	0	0	0	0	0	0	0	0	0	0	0	0	0	0	0	0	0
assembly11165_656bp	1.02255	0.307491	1.27232	0.603832	0.996575	1.01899	0	0.771297	0	0	0.355927	2.00813	0.244463	0.772967	0.281079	0.746164	0	0.335706
assembly11166_509bp	0	0	0	0	0	0	0	0	0	0	0	0	0	0	0	0	0	0
assembly11167_997bp	7.27585	7.85659	6.79925	23.7842	29.4772	26.4602	16.442	23.884	15.3885	9.55967	8.80929	9.13605	17.5665	19.5743	13.528	9.83258	10.144	15.8194
assembly11168_422bp	20.1348	21.7651	12.4512	7.38326	12.2738	9.35631	19.7423	14.8218	10.1693	37.1538	15.8851	12.6914	12.0295	20.7015	10.8875	28.0945	8.50402	7.17025
assembly11169_561bp	3.55332	2.01362	2.6052	0.969639	3.53887	1.44536	3.35974	1.13765	2.24065	2.14058	6.0399	3.32787	3.02763	3.71338	0.934403	3.26537	3.53789	1.84604
assembly1116_1418bp	0.123628	0	0.457166	0.118652	0.203741	9.04688e-22	0.0859773	0.0332364	0.0945218	0.156503	0.100924	0.046978	0.217287	0.120067	0.182883	0.187996	0.00296657	0.0871867
assembly11170_530bp	2.61836	1.09653	0	0	0	0	0	1.42867	2.3462	0.837795	0	0	0.922025	0.935286	1.01429	2.64686	0	0
assembly11171_549bp	0	0	0	0	1.13745	2.03081	2.42599	0.446643	5.50622	1.56343	1.42935	0	11.2094	7.21387	6.12443	0.332022	4.20822	2.67306
assembly11172_360bp	0	1.40452	0	0	0	0	2.59381	0	0	0	0	0	0	0	0	0	0	0
assembly11173_410bp	0	0	0.688353	0	0.590756	0	0	1.43678	0	0.556352	0	1.42436	0	0	0	0.358257	0	0
assembly11174_694bp	5.39183	4.74915	2.64088	6.16823	9.96276	7.7216	3.03669	6.09217	3.72378	6.95794	3.6344	2.35177	3.35668	11.0465	4.39823	11.1902	5.90363	3.88947
assembly11175_354bp	0	2.9468	1.59882	0	0	1.56266	0	0	0	0	0	0	0	0	0	0	0.68956	0
assembly11176_342bp	0	0.696397	0	0	0	0	0	0	0	0	0	0	0	0	0	0	0	0
assembly11177_641bp	0	0	0	0	0	0	0	0	0	0	0	0	0	0	0	0	0	0
assembly11178_496bp	17.0644	28.5175	35.3312	17.8594	20.6758	17.8346	19.5918	19.8815	20.4199	23.4705	19.6312	21.3807	28.3605	19.4974	15.0548	17.2413	18.1227	17.0917
assembly11179_1633bp	0.184497	0.271837	0.14252	0.320571	0.61822	0.512535	0.263889	0.0958614	0.222886	0.398145	0	0.221549	0	0.260245	0.126396	0.0712757	0.129592	0.14188
assembly1117_1782bp	1.39308	1.9003	1.06174	2.14236	2.09316	2.28984	0.366489	0.887428	1.45836	0.888854	0.147795	0.970418	1.05474	2.21555	1.0655	1.1751	0.891212	1.40002
assembly11180_442bp	0	0	0	0	0	0	0	0	0	0	0	0	0	0	0	0	0	0
assembly11181_692bp	0	0	0	0	0	0.68283	0	0	0	0	0	0	0	0	0	0	0	0
assembly11182_353bp	0	0	0	0	0	0	0	0.868545	0	0	0	0	0	0	0	0	0	0
assembly11183_348bp	3.95448	0.839575	0.900002	3.90818	0.743527	1.79452	1.60383	1.85771	2.82508	0.696403	1.89775	0.979196	1.43895	0.859739	0.851283	3.27976	1.60771	3.59849
assembly11184_354bp	0	0	0	0	0	0	0	0	1.08761e-33	0	0	0	0	0	0	0	0	0
assembly11185_402bp	11.8047	8.91346	8.04444	9.86227	23.2057	10.6996	4.94131	12.8699	6.3076	11.96	10.5718	17.198	10.1845	14.1363	10.3953	7.80199	3.09879	10.8896
assembly11186_419bp	0	0	0	0	0	0	0	0	0	0	0	0	0	0	0	0	0	0
assembly11187_617bp	0	0	0	0.431447	0	0	0	0	0	0	0	0	0	0	0	0	0	0
assembly11188_557bp	1.32559	1.1385	0	1.08498	0.448582	2.43129	4.3631	1.40498	2.45297	1.63512	0.664938	0.61345	0.934482	0.464128	0.527584	1.29161	1.12427	3.01471
assembly11189_513bp	8.97316	12.9588	4.60637	2.01745	3.65704	4.33529	3.27929	4.53277	9.99234	7.6677	4.5337	5.47789	3.26672	8.10836	13.6999	7.43607	5.17414	5.4837
assembly1118_1015bp	6.03973	2.55027	2.9917	3.10394	4.22696	0	0.829731	4.06811	0	5.68915	5.2958	0.891205	0.683617	3.49166	2.23316	5.00516	1.55957	3.09955
assembly11190_493bp	0.9131	1.69447	0	0	0	1.14982e-71	0	0	0	0.550258	0.392003	0	0	0	3.9927e-72	0.353139	0	0
assembly11191_362bp	0	2.18462	0	0	0.925908	0	4.21973	1.46076	0	0	2.53192	0	1.80842	0	1.02409	0	0	2.32485
assembly11192_801bp	0	0.188474	1.01196	0.679557	0.178201	1.3604	0.361267	0.562669	0.612455	0.170102	0.887201	0.627196	0.312049	0	0.51829	0.430967	0.176062	0.384055
assembly11193_509bp	0.416708	0	0	0	0.200509	0.208666	0	0.330237	0	0.191694	0.23262	0.226962	0.341596	0	0.784631	0.485005	0.190227	0
assembly11194_376bp	2.61005e-68	0.742659	1.0024e-30	0.703383	1.32671	2.57469e-25	2.13842	0.741347	7.3195e-29	0.626421	6.00928e-30	1.67237	0.611828	2.18648	4.37044	1.66546	1.87745e-32	1.82811
assembly11195_328bp	0	0	0	0	0	0	0	0	0	0	0	0	0	0	0	0	0	0
assembly11196_382bp	0	1.63457e-62	0	5.92731e-80	8.08328e-67	0.597033	9.33157e-59	1.27486	0.594207	0	0	5.45483e-57	3.7529	0.00948734	1.98663	5.28867e-76	0.538665	3.47684
assembly11197_723bp	0.253526	0.498048	0.269245	0.811503	3.65666	0.901682	0.719193	0.500831	0.671128	0.450784	1.41655	0.558325	0.823933	0.131248	1.29103	0.59209	0.456307	1.18789
assembly11198_367bp	0	0	0	0	0	3.77307	0	0	2.55763e-34	0	0	0	0	0	1.1476	1.82266	1.16711	0
assembly11199_462bp	4.51591	4.89631	3.20173	8.72881	11.2554	6.92995	2.33859	4.42307	5.85259	4.59582	3.43699	4.71735	4.46208	9.53045	5.04756	5.70507	6.0857	6.81043
assembly1119_998bp	0	0	0	0	0	0	0	0	0	0	0	0	0	0	0	0	0	0
assembly111_471bp	3.86677	1.91229	1.21446	1.72428	3.44792	0.794562	1.45178	5.00516	0.824353	2.58115	1.74971	1.67353	2.15917	2.63046	4.59989	3.97984	4.85871	10.8132
assembly11200_377bp	1.89034	2.60125	1.38563	0	0	1.36963	0	1.4719	3.53434	2.7876	2.29325	1.51161	1.61937	1.31534	0.617094	5.14716	1.25999	0.685595
assembly11201_363bp	0	1.75845	1.80651	0	0	0	0	0	0	0	0	0	0	0	0	0	0	0
assembly11202_312bp	0	0	0	0	0	0	0	0	0	0	0	0	0	0	0	0	0	0
assembly11203_559bp	0	0	0	0	0	0	0	0	0	0	0	0	0	0	0	0	0	0
assembly11204_635bp	0	0	0	0	0	0	0	0	0	0	0	0	0	0	0	0	0	0
assembly11205_339bp	0	4.77278	0	0	0	1.00553	0	0	0	0	1.13514	0	0	0	1.60217e-48	0	0	0
assembly11206_328bp	0	0	0	0	0	0	0	0	0	0	0	0.754539	0.551007	0.731735	2.62847	0	0	0
assembly11207_336bp	0	0	0	0	0	0	0	0	0	0	0	0	0	0	0	0	0	0
assembly11208_577bp	12.9746	9.846	7.91759	7.71715	11.6272	6.7271	7.1224	7.64833	7.90172	9.25117	8.40606	4.86618	2.77777	9.53556	7.22949	10.3343	3.18617	4.9214
assembly11209_359bp	0	0	0	0	0	0	0	0	0	0	0	0	0	0	0	0	0	0
assembly1120_728bp	3.05116	9.2437	7.12388	5.8324	7.97505	4.42977	2.94802	5.40157	3.79161	2.22493	3.55002	4.50289	3.48844	0.353895	2.48104	2.40453	5.5051	6.04214
assembly11210_350bp	0.690768	0	0	1.3433	0	0	0	0	2.32553	0	0	0	0	0	0	0	2.10648	2.31156
assembly11211_386bp	0	0	0	0	0	1.07003	0	0.42077	0	0	0.593046	0	0	0.556122	0	0.322327	0	0
assembly11212_352bp	1.24311	0	0	0	0	0	0	2.98421	0	3.31	0	1.54175	0	0	0	0	0	3.30197e-23
assembly11213_439bp	0.575495	0.664187	0	0	0	0	0	0	0	0	0	0	0	0	0	0	0	0
assembly11214_728bp	0	0	0.427579	0.182253	0	0.203824	0	0	0.217536	0	0.462707	0	0.349102	0.217589	0	0.115881	0.914584	0
assembly11215_484bp	0.574171	0	0.694193	0	2.93362	0	0	0.449873	0	0	0	0	0	1.83986	0	1.03812	1.21819	1.35667
assembly11216_388bp	0	0	0	0	0	0	0	1.48585	0	0	0	0	0	0	1.89949	0	0.875727	0
assembly11217_427bp	0	2.07852	5.79943	1.85726	0	2.81752	1.36967	0	0	0	5.49061	0.787602	0.57784	0	1.29277	0	5.04147	0.733667
assembly11218_740bp	0.2226	1.13637	0.966349	1.27324	0.443735	0.480071	0	0.519479	0.997904	0.396698	0.519335	0.250732	0	0	0.218239	0.130582	0	0.237235
assembly11219_760bp	1.14423	1.81703	1.42332	0	0.390095	0	0.927157	0.603614	0	1.02587	0.539072	2.40305	0.746173	0.394624	0	0.667152	0	0
assembly1121_1387bp	8.87832	8.4109	8.84928	10.1387	6.45621	8.6764	8.93956	8.25179	9.65181	10.3252	9.7459	8.35061	6.02508	10.5333	6.77536	9.60582	6.19953	6.80547
assembly11220_301bp	0	0	0	0	0	0	0	0	0	0	0	0	0	0	0	0	0	0
assembly11221_457bp	0.455879	0	0.991921	0.889741	0	0	0	1.04343	0.528788	0.4006	0.558316	0.548925	1.18853	2.79463	2.67659	0.262567	0	0
assembly11222_428bp	0.906605	0	0	0.990992	0	0	0	1.45176	0	0.846849	1.14209	0	0	0.951235	0	0.54192	0	0
assembly11223_453bp	0.886559	0	0	0	1.68771	0	0	2.03196	1.23456	1.64319	0	0	1.8216	1.78659	0	0	2.10707	0
assembly11224_421bp	0.281479	0	0	0.238887	0	0.272589	0	0	0	0	0	0	0.216696	0	0	0.165191	0	0
assembly11225_363bp	0	0	0	0	0	0	0	0	0	0.474587	0	0	0	0	0	0.640842	0	0
assembly11226_397bp	0	0	0	0.629442	0	0	0	0	0	0	0	1.50649	0	0	0	0	0	0
assembly11227_1241bp	0	0.780051	0.819828	0.367235	0	0.502037	0.311613	0	0.1702	0	0.742677	0.0845953	0.130135	0	0.366085	0	0.660649	0.335669
assembly11228_455bp	0	0	0	0.432927	0	0.739103	0	0	0	0	0	0	0.198441	0.27138	0	0	0	0
assembly11229_335bp	0	3.49139e-44	0	0	2.94025	0	0	0	0	1.41798	0	6.32691	0	0	1.7393	0.945227	0	0
assembly1122_706bp	4.5327	4.38143	5.9647	7.43187	3.76079	5.00969	2.37336	3.75283	5.31986	5.82945	2.47686	4.46333	2.87395	1.57764	2.20766	3.93043	3.22459	4.49994
assembly11230_401bp	0	0	0	0	0	0	1.34501	0	0.74657	0	0.815826	0	0	0	0	0	0	0
assembly11231_304bp	0	0	0	0	0	0	0	0	0	0	0	0	0	0	0.906171	0	0	0
assembly11232_415bp	0	0	0	0	0	0	0	0	0	0	0	0	0	0	0	0	0	0
assembly11233_376bp	0	0	0	0	0	0	0	0	0	0	0	0	0	0	0	0	0	0
assembly11234_349bp	0	1.33237	1.49736e-49	6.10494e-52	4.71443e-52	1.93141e-64	5.04238	0.496796	3.49027e-92	0.566361	0.771826	9.0449e-70	0	1.34452	1.98543e-80	9.9769e-59	2.88457e-61	0
assembly11235_443bp	0	0	0	0	0	0	0	0	0.268913	0	0	0	0.813204	0	0	0	0	0
assembly11236_423bp	0	0	0	0	0	0	0	0	0	0	0	0	0	0	0	0	0	0
assembly11237_330bp	0	0	0	0	0	2.74749e-16	2.2693	0	0.00214048	0	0	0	9.43086e-81	0	0	0	3.31989e-29	0
assembly11238_311bp	0	0	0	0	0	0	0	0	0	0	0	0	0	0	0	0	0	0
assembly11239_491bp	0	0	0	0	0	0	0	0	0	0	0	0	0	0	0	0	0	0
assembly1123_1980bp	10.701	8.77566	8.5755	7.22442	7.53415	10.5931	7.73243	7.92474	9.25243	9.14999	8.32017	7.33982	7.09149	10.6921	7.15907	10.8573	5.58059	9.17418
assembly11240_455bp	0	0	0	0	0	0	0	0	0	0	0	0	0	0	0	0	0	0
assembly11241_567bp	0	0	0	0	0	0	0	0	0	0	0	0	0	0	0	0	0	0
assembly11242_333bp	0	0	1.22818	0	0	0	0	0	0	0.918956	0	0	0.972152	0	1.1264	0	0	0
assembly11243_335bp	0	0	0	0	2.6602	0	0	1.13593	0	0	0	0	0	0	0	1.76786	0	1.95973
assembly11244_321bp	0	0	0	0	0	0	0	0	0	0	0	0	0	0	0	0	0	0
assembly11245_540bp	0	0	0	0	0	0	0	0	0	0	0	0	0	0	0	0	0	0
assembly11246_541bp	0	0	0	0.75513	0	0	0	0	0.178541	0	0	0	0	0	0	0	0	0
assembly11247_455bp	0	0	0	0	0	0	0	0	0	0	0.663835	0	0	0	0	0	0	0
assembly11248_471bp	0.311921	0.330593	0	0.31677	0.31318	0	0	0.253437	0	0	0	0	0.276408	0	0	0.375107	0	0.339974
assembly11249_447bp	3.81689	0.547047	1.1266	0.510938	2.55278	0	2.10058	5.987	2.94458	1.3147	0.645121	1.83267	2.65922e-79	4.34183	1.51107	2.61506	1.00537	0
assembly1124_1140bp	9.36949	6.53272	4.58642	6.49787	7.40512	7.66449	9.22302	8.31669	4.69371	10.3158	8.41332	8.44038	5.14446	8.60431	5.52442	9.4473	6.27206	5.19167
assembly11250_361bp	0	0	0	0	0	0.684026	0	0	0	0	0	0	0	0	0	0	0	0
assembly11251_404bp	0	1.60176	0.820725	0	0	0	1.49895	0	0.862366	0	0	0	0	0	1.44692	0	0	0
assembly11252_321bp	0	2.79733	7.26881	0	0	8.67669	0	0.104422	2.67111	0	1.63253	0	1.16422	0	0	0.875826	6.53056	0
assembly11253_769bp	0	0	0	0	0	0	0	0	0	0	0	0	0	0	0	0	0	0
assembly11254_980bp	0	0.000564629	0	0	0	0	0	0	0	0	0	0	0	0	0	0	0	0
assembly11255_697bp	1.39829	0.319999	0	1.48813	1.60293	2.33459	1.2164	0.639021	0	0.25224	0	0.343595	1.78213	0.281424	3.8325	0.478511	0	1.00492
assembly11256_769bp	0.663494	0.442123	1.34667	0	0.688113	1.42405	1.60967	0.812931	0.47876	1.2715	4.56318	2.33089	1.76851	2.0681	0.391091	3.4814	0.416544	1.85523
assembly11257_465bp	1.54422	1.84326	1.89496	0.576343	0.515152	0.652094	4.60764	0.845975	4.66153	5.82568	2.23591	1.35714	1.01611	1.65686	1.71198	2.41107	2.30342	1.88097
assembly11258_789bp	0	0	0.332966	0	0	0	0	0	0	0	0	0	0	0	0	0	0.14321	0
assembly11259_1859bp	4.09873	0.856046	0.802304	0.164416	0.882816	3.20224	1.10988	1.37635	0.71178	2.81741	0.710206	0.587849	3.91968	2.62933	3.99278	1.06051	2.42347	3.38225
assembly1125_1742bp	0	0.36067	0.223224	0.0770482	0.0378782	1.57261	0.211567	0	0.0836314	0	0.169768	0	0.126002	0	0.201016	0.0219452	0.392821	0.0809856
assembly11260_1744bp	1.35865	3.71207	0.834299	2.1065	4.18422	1.93541	0.526717	4.19424	1.03673	4.26019	0.560823	0.323821	5.02728	3.52978	2.087	2.24639	2.27731	0.833109
assembly11261_1952bp	1.22466	0.256621	0.29483	0.0362923	0.26368	0.0824708	1.05036	0.482136	0.378034	0.458508	0.328412	0.63904	0.400448	0.995949	0.737072	0.621151	0.189332	1.78794
assembly11262_1879bp	1.86586	0.765737	1.02201	0.833458	1.3042	0.095987	5.22535	1.17552	1.8728	0.442322	1.98736	2.31792	0.183145	1.02844	0.570507	1.82372	0.240162	1.63212
assembly11263_1671bp	1.99961	4.3322	6.34139	8.9078	8.34936	4.36979	1.21453	4.7228	5.65549	5.95094	3.58993	3.70762	2.27153	5.03734	5.5373	4.32411	9.18514	2.57828
assembly11264_1786bp	7.02213	2.67055	2.9502	4.77932	5.15992	4.17221	6.78379	3.84872	3.67565	2.90376	4.54478	2.45206	1.95659	2.84275	4.14543	3.21822	3.23863	3.2946
assembly11265_1764bp	0.517085	1.23588	2.06963	1.14855	1.79427	0.0779929	0.86061	1.31869	2.90734	0.810277	1.57374	3.02261	0.169004	1.82211	0.601745	2.32347	0.583194	1.41337
assembly11266_1837bp	0.366623	0.997564	0.270236	0.330748	1.02418	0.0364519	0.42713	1.23359	0.514265	0.602795	0.250885	0.301591	0.391302	1.19498	0.265889	1.20792	0.141969	0.447473
assembly11267_887bp	0	0	0	0	0	0	0	0	0	0	0.516204	0	0	0	0.410519	0	0	0
assembly11268_567bp	17.3536	12.0362	14.1976	15.6298	9.88832	17.8408	10.4133	9.08973	12.3859	15.3304	12.7252	13.9805	8.43534	16.7852	10.6619	13.2088	11.2087	9.20727
assembly11269_1026bp	3.30077e-24	0.467249	0.167119	0.419863	0.112056	2.00062e-23	0.455076	0.0879538	0.253979	0.103863	0.542196	0.340169	1.08811	0.359471	2.13499e-23	0.607684	0.216679	2.8583e-23
assembly1126_1029bp	0	3.96343e-20	1.50457	1.58595e-22	0	0.201552	0.0557071	0	4.25749e-11	0	2.06049e-07	0	4.02796e-05	0	4.19562e-19	0	3.879e-11	0.000474182
assembly11270_334bp	0	0	2.37581	0.696146	0	0	1.37348	3.06816	0	0.665333	1.6989	0	0	0	2.1917	0.456238	0	0
assembly11271_1088bp	1.04352	1.04829	0.325606	1.79781	1.78034	2.72634	0.199329	1.87302	0.443952	1.54048	0.614065	0.812269	1.04647	2.40623	1.18418	0.948911	0.726674	1.04476
assembly11272_932bp	0.000403045	8.84172e-13	0.950787	2.06928e-05	4.92971e-05	3.58001e-05	0.217474	0.0860178	1.38979e-10	0.00268913	2.14544e-17	0.123198	0.0794706	2.26972e-09	3.00856e-08	0.772238	0.450383	0.106393
assembly11273_348bp	6.25348	6.58919	5.23221	10.2552	25.4483	9.70428	8.01251	14.0184	6.37256	12.9836	8.66905	7.02164	13.054	20.7321	13.5723	16.3928	9.06263	13.4197
assembly11274_918bp	1.11761	1.03147	0.654817	1.61938	1.36017	1.37635	1.64102e-14	2.6735	3.03052e-19	2.5321	0.584334	0.267763	0.639313	0.302316	3.80783	2.92047	0.484007	1.01772
assembly11275_439bp	1.04506e-21	1.88905e-17	4.79789	0.449724	2.61252	1.03996	1.19062e-13	3.97061	0.525338	0.834106	1.31359	3.09913	6.73247e-08	3.24754	0.0218367	0.979371	2.71131	2.91251
assembly11276_482bp	5.2446	4.96677	0.948998	2.88068	9.53072	2.8365	3.79962	5.11174	0.966518	1.12868	2.25397	0.937171	3.60071	1.72306	5.26652	5.46821	2.47798	10.024
assembly11277_417bp	0	0	0	0	0	0	0	0	0	0	0	0	0	0	0	0	0	0
assembly11278_972bp	0	0	0	0	0	0	0	0	0	0	0	0	0	0	0	0	0	0
assembly11279_892bp	2.79305	3.0724	0.629996	3.07698	1.82188	4.6236	0.00208412	0.208864	3.4763e-11	8.67815e-05	4.05227	4.85608	6.47476	3.82245	0.0341742	2.83864	2.55341	3.3
assembly1127_1663bp	0	0.768165	0.627121	0.421171	0.040558	0.0952234	0.269985	0	0.60091	0	0.2326	0	0.1644	0	0.281406	0.0236396	0.906621	0.0971599
assembly11280_958bp	8.40353	0.37794	7.71859	1.23187	6.70934	2.33454	1.50517	6.72848	1.05211	8.28773	2.33356	0.891106	0.312904	4.20159	1.28067	6.18844	2.47757	0.77814
assembly11281_643bp	0.458687	3.97077	2.50318	6.28857	12.12	1.69976	5.37213	2.25366	9.71821	3.33942	1.36804	0.547162	2.04583	4.48145	8.84376	4.63314	5.70824	10.5691
assembly11282_1075bp	0	0	0.0838943	0	0	0	0	0	0.182521	0	0.0929135	0	0	0	0.0780767	0	0.605816	0
assembly11283_1112bp	0	0	0.0806328	0	0	0	0.602578	0	0.170063	0	0.0896132	0	0.130685	0	0.0751934	0	0.145691	0
assembly11284_365bp	0	0	0	0	1.32341	5.65741e-20	1.10921e-32	2.29709	2.06764	1.34978	0	0	1.18621e-20	4.3218	1.60841	2.11672e-24	0	0
assembly11285_617bp	2.45033	1.87403	0	1.18144	1.40121	1.92916	3.73432	9.27965e-17	0.0489953	0.441388	0.0288868	0	1.54585	0.992529	0.311941	0.858916	0.000261556	2.65318
assembly11286_637bp	9.00864e-18	0.432399	0	0.414015	0.352859	0.516972	1.04661e-16	0.572922	1.45054	0.336166	1.00471	0	4.09724e-20	1.49247	0.195714	1.95056	0.83333	0
assembly11287_2405bp	1.30258	1.30933	1.10955	1.18956	0.823111	1.95598	1.19227	0.990016	0.924968	1.30802	0.962754	0.78853	1.6668	2.82762	1.32814	1.83369	1.9538	1.25706
assembly11288_947bp	8.95427	1.98202	2.42824	2.69441	4.21614	2.68151	1.27811	5.98383	1.74864	6.55188	1.90133	1.46588	2.01183	9.20788	4.3418	6.01263	0.945403	2.2406
assembly11289_365bp	3.93038	2.12527	2.26266	1.00208	3.72634e-22	1.12013	2.0406	5.47736	10.4724	12.4442	6.26386	1.25198	6.20152	2.11432	2.08531	3.60567	0.182431	4.00563
assembly1128_844bp	21.7232	20.6576	24.734	20.1706	8.44609	27.9806	14.4296	8.18287	17.3959	15.8718	10.9564	13.0001	3.72201	3.60174	2.26788	12.9082	8.87266	11.0588
assembly11290_451bp	16.0356	10.4039	17.5238	6.24786	1.55128	2.80634	28.0041	7.84072	22.578	33.8137	12.3977	22.3218	13.053	12.3413	9.65559	14.588	13.5733	7.17725
assembly11291_1021bp	0	0	4.13869e-22	2.38577e-15	2.1937e-23	0.368132	3.18073e-18	4.46372e-13	0	4.3759e-17	0	0	8.05223e-23	6.47369e-23	9.97331e-24	5.44357e-25	1.01124e-23	6.26181e-23
assembly11292_4101bp	0.308807	0.254586	0.694545	0.191073	0.285925	0.489704	0.547892	0.630901	0.61374	0.391303	0.774004	0.602818	0.702497	0.448781	0.617775	0.649217	0.687331	0.457305
assembly11293_1372bp	0	0.105193	0.221455	0.194676	0	0.335377	0	0	0.114081	0	0	0	0	0	0	0	0.197988	0
assembly11294_2531bp	0	0	0.229505	0	0	0.11858	0	0	0	0	0.256823	0	0	0	0	0	0	0
assembly11295_940bp	0	0.543139	0.575793	0.250066	0	0.141898	0.525057	0	0.73799	0	0.312414	0	0.553803	0	0.126704	0	0.498335	0.560836
assembly11296_906bp	0	0	0	0	0	0	0	0	0	0	0	0	0	0	0	0	0	0
assembly11297_1206bp	0.0498713	0.473796	0.722817	0.327504	0.103044	2.34297	0.33227	1.15599e-13	0.425511	0.0209229	0.904535	0	0.182472	0.11879	0.28708	0	0.870787	0.389515
assembly11298_1408bp	0	8.82506e-08	0.000165848	0.0980542	0.100989	0.346499	0.246041	0.0775137	0.0689569	0.239076	0.00539826	0	0.132258	0	9.08998e-19	0	2.60831e-16	0.00552935
assembly11299_1315bp	0.0604258	1.04195e-07	0.642074	0.106497	0.118264	0.121261	0.320196	1.1269e-13	0.13779	0.0199077	0.0506231	0	0.167379	0.112539	0.254751	0	3.31526e-16	0.344503
assembly1129_1629bp	1.12983	1.23891	1.80753	3.82669	5.93393	1.05332	1.70796	3.28003	1.91308	3.08339	1.84347	1.35441	1.16808	1.80673	0.828516	2.12088	2.33499	2.9985
assembly112_410bp	0	0	0	0	0	0	0	0	0	0	0	0	0	0	0	0	0	0
assembly11300_1287bp	0	0	0.10977	0	0	0.112533	0	0	0	0	0	0	0	0	0.298248	0	0	0.208424
assembly11301_787bp	0	3.78584	6.72056	1.19675	0.201793	2.70102	2.03876	0.161374	2.04205	0	5.51481	1.57807	1.04892	0	1.34916	0.238903	2.33244	0.871168
assembly11302_589bp	6.19216	4.43141	1.00743	4.25236	2.76086	1.58344	0.9593	2.17713	4.95811	3.9804	4.60622	5.28943	6.76341	1.61001	4.08499	4.60379	3.27753	6.9066
assembly11303_792bp	0.372783	1.10178	2.72303	0.523949	0.378222	1.98151	1.06748	0.147267	0.801415	0	2.74614	0.204157	2.01782	0.593948	0.178566	0.217547	2.24266	0.761618
assembly11304_472bp	7.19977	4.95613	0	2.78198	1.50073	0	0	18.9632	3.48752	5.39198	0	0	5.53778	12.2504	0	1.74935	0	3.04539
assembly11305_790bp	0	0.28805	0	0.130319	0	0	0.269179	0	0	0	0	0	0	0	0	0	0	0
assembly11306_315bp	0	0	0	0	0	0	1.44784	0	0	0	0	0	0	0	0	0	0	0
assembly11307_1734bp	1.065	1.12403	1.32348	0.51556	1.23097	0.681842	0.155098	0.654534	1.13635	1.12523	0.0850785	0.43979	1.23671	1.23621	0.379125	1.2423	0.0676685	0.566546
assembly11308_1264bp	0.979723	1.17531	1.34421	1.10799	0.882937	1.68183	1.96171	0.71666	0.559223	1.28244	2.26785	1.48657	0.842209	1.82858	1.40491	1.09192	1.42802	0.426825
assembly11309_679bp	0.581312	0.016035	0.912834	0.402284	0.0118288	1.04269e-18	2.89171e-12	0.0094925	1.53588	0.779562	0.829999	0.391868	4.44805	6.61897	0.887005	5.60327e-07	1.71407	0
assembly1130_557bp	0	0	0	0	0	0	0	0	0	0	0	0	0	0	0	0	0	0
assembly11310_740bp	2.65752	2.98739	0.42675	3.07491	1.16323	5.54154	3.24448	6.32122	2.27683	0.216241	5.05502	3.12058	4.2531	7.99229	16.669	2.2372	2.81564	5.62311
assembly11311_685bp	2.87621	0.828371	1.57571e-35	1.5575	3.04427	2.34536	3.74804	4.80302	4.65375	0.881962	1.55453	1.67824	19.7086	9.61249	7.90182	3.89788	3.34119	0.588786
assembly11312_673bp	0	0.215873	0.232619	0	0	0	0	0	0	0	0.218493	0	0	0	0	0	0.19495	0
assembly11313_1553bp	0	0.444326	0.216697	0.570895	0	0.0997785	0.750822	0	0.0417048	0	0.362074	0.252415	0.0514107	0	0.0656465	0	0.000873726	0.0629734
assembly11314_1122bp	0	0.0340572	0.882706	0.0905346	0	0.20769	1.33842e-09	0	0.0606814	0	1.0949e-10	0.48582	0.674104	0	0.112583	0	0.412711	0.132991
assembly11315_403bp	0	0	0	0	0	0	0	0	0	0	0	0	0	0	0	0	0	0
assembly11316_797bp	2.05159	1.18624	0.287194	2.48308	3.95882	3.34874	0.546134	0.183239	0.300018	0.438064	5.72498e-20	1.30047e-19	1.64099	0.855825	4.32479e-11	0.36433	0.261324	0.294094
assembly11317_771bp	4.16227e-18	7.54384e-22	1.87275e-17	0.272084	1.88339	1.31425	0	0	0	2.58262	3.86643e-21	5.81849e-21	0.0745723	3.29019e-19	4.55258e-11	0.290515	0	0.310524
assembly11318_1164bp	3.95837	2.72155	4.80211	8.53888	2.94595	7.33743	0.831608	2.32255	1.61745	2.22002	2.21483	1.82211	2.32685	2.38167	0.57834	4.00233	2.59771	1.58512
assembly11319_509bp	0.382091	0	0.44107	0	0	0	0.770976	0.322491	0	0	0	0	0	0	0	0.703181	0.397058	0.4035
assembly1131_563bp	0	0	0	0	0	0	0	0	0	0	0.303322	0	0	0	0	0	0	0
assembly11320_1344bp	0	0.242703	0.672473	0.556975	0.227504	0.380142	0.68386	0.177713	0	0	0.561611	0.13276	0.200925	0	0.339788	0.0663413	1.22593e-08	0
assembly11321_1329bp	0.222285	0.119105	1.46188	0.328701	0.111665	0.249407	0.227545	1.96791e-24	0.12966	0.104342	0.279165	0	0	0	3.68296e-38	0.0652521	0.554136	0.122431
assembly11322_736bp	3.23216	1.31201	3.71831	5.23472	5.04561	4.51356	2.12233	5.72008	2.62927	2.13653	1.7746	0.480394	2.18736	1.33199	2.45576	3.60377	3.28342	1.99566
assembly11323_424bp	0	0	0	0	0	0	0	0	0	0	0	0	0	0	0	0	0	0
assembly11324_2501bp	0	0.357825	0.243066	0.000332057	0.0201156	0.168908	0.454815	0.0145146	1.47343e-17	0.0183464	0.000643949	0.176119	0.373036	0	0.114117	0.011489	0.000192019	0.0607479
assembly11325_2397bp	0	0.624856	1.11533	0.304138	0.0207461	0.390244	0.509001	0.0168089	0.317918	0.0188971	0.728877	0.0453562	0.000313579	0	0.0781293	0.0118542	0.727099	0.0650034
assembly11326_459bp	0	0	0	1.02628	0	0	0	0.689683	0	0	0	0	0	0	0	0.528581	0	0
assembly11327_3005bp	0	0.0805272	0	0.595542	0.117727	0.300271	0.627918	0	0	0	0.0469528	0.0862214	0.0341199	0	0.037958	0	0.226054	0.492657
assembly11328_3465bp	0.0327858	1.67517	2.31485	0.45529	0.166915	1.04612	1.43901	0	0.498346	0.0299481	1.76403	0.298351	0.470221	0	0.359745	0	1.29899	0.32915
assembly11329_843bp	0.203228	0.652706	6.04167	0.598705	0	1.78971	5.17154	0	0.710712	0.188183	2.23789	0.480756	1.47184	0.214341	0.406695	0	5.22807	1.13645
assembly1132_4010bp	44.3099	39.4049	40.5083	45.7678	49.8529	43.7366	46.1245	47.3777	45.7327	43.7727	45.1032	48.3437	48.8712	52.8997	50.5639	46.8005	44.633	49.8973
assembly11330_1045bp	0	1.13008	5.01852	2.3487	0.316973	0.427406	0.610966	0	0.182236	0	1.53113	0.178526	2.11055	3.45682e-24	2.77365	3.13054e-43	1.22826	0.01999
assembly11331_960bp	0.865147	6.26643	5.28998	1.37002	1.06243	4.64157	7.01283	0.678403	3.27343	0.480907	8.35797	2.62684	4.34944	2.57052	2.42002	1.11554	9.25743	3.10365
assembly11332_485bp	43.9843	41.0561	45.5524	71.2896	96.1508	62.7907	45.2714	73.012	37.4044	42.5774	32.2475	45.6447	42.738	55.5543	33.7539	60.9132	58.1062	93.3546
assembly11333_942bp	2.08369	0.887888	0.897257	0	1.82882	0	0.874962	2.22672	1.49936	1.63929	0.510651	0.92634	2.18738	3.96594	2.43515	1.86013	0.419434	0
assembly11334_704bp	0	0.568866	0	0	0	0	0	0	0	0	0	0	0	0	0	0	0	3.81068e-19
assembly11335_367bp	0	0	0	0	0	0	0	0	0	0	0	0	0	0	0	0	0	0
assembly11336_383bp	0	0	0	0	3.09551e-41	0	0	0	1.20576e-27	0	0	0	0	0	1.02037	0	0	0
assembly11337_2008bp	19.5523	8.07232	11.9392	25.7341	37.6681	22.895	11.7135	13.5017	22.1408	25.0713	14.8979	13.4578	8.35592	20.1523	13.4269	27.4367	12.9392	29.4511
assembly11338_363bp	0	0	0	0	1.58608	0	0	0	0	1.46665	0	1.85743	0	3.42753	0	4.9278	0	1.64424
assembly11339_674bp	0	0.490415	0.52393	0	0	0	0	0	0	0	0	0	0	0	0	0	0	0
assembly1133_482bp	0	0.543875	0.564534	1.80901e-70	0	0.578915	0	0	3.22833e-74	0	6.36467e-48	0	4.93068e-66	0	8.68065e-69	0	6.83088e-78	0
assembly11340_414bp	0	0	0	0	0	0	0	0	0	0	0	0	0	0	0	0	0	0
assembly11341_439bp	0	0	3.3068e-22	0.225151	0	0.91293	0	0	0	0	0	0	0.138909	0	0	0	0.800976	0.177495
assembly11342_470bp	0	0	2.96793e-22	0.274406	0	0	0	0	0	0	0	0	0.126062	0	0	0	0	0.16036
assembly11343_542bp	0	1.26843	1.0215	0.2323	0	0	0	0	0	0	0	0	0.106839	0	0	0	0	0.13551
assembly11344_621bp	0	0.489796	0.195687	0	0	0	0	0	0	0	0	0	0.0827225	0.437101	0	0	0.466369	0.103213
assembly11345_419bp	0	0	0	0	0	0	0	0	0	0	0	0	0.151425	0	0	0	0	0.189698
assembly11346_900bp	3.83287	0.455787	0.932565	2.85643	2.81664	1.72334	0.892802	1.54626	1.00655	2.35313	3.17404	1.4728	1.6904	1.61787	3.79006	2.72747	2.83208	1.72126
assembly11347_1502bp	5.22917	1.94228	3.29517	3.57745	2.09871	4.53009	4.03436	5.86991	5.7948	4.72831	2.06332	4.2053	3.91369	8.14689	5.26264	5.27632	4.40019	8.42557
assembly11348_1353bp	13.827	20.1532	20.6043	28.0479	29.7687	31.027	18.2565	19.2568	22.5475	14.6713	20.8814	18.0628	28.227	22.9235	24.2908	17.5883	21.0955	26.9229
assembly11349_519bp	108.663	107.303	121.54	95.9739	140.558	113.366	86.3303	128.532	96.7739	124.614	119.546	104.551	110.013	99.5071	124.122	101.591	105.509	112.796
assembly1134_616bp	2.46444	4.52582	2.37381	4.98956	2.49794	3.88597	6.10433	1.92896	1.94627	5.30897	1.05014	4.3012	1.84583	3.8883	1.68497	3.48243	2.11544	4.84809
assembly11350_962bp	0	7.25196e-09	2.03576e-15	2.10814e-05	0	0	0	0	0	0	0.701308	0.0394254	2.65628e-19	0	0	0	0	0
assembly11351_1153bp	0	0.11406	2.35185e-12	1.51476e-05	0	0	0.138997	0	0	0	0.0308042	0.0311309	0.00277706	0	0	0	0.132277	0
assembly11352_1014bp	0	1.2092	1.63199e-15	0.637232	0	0	0	0	0	0	0.0540154	0.0374724	2.53052e-19	0	0	0	0	0
assembly11353_1046bp	0	1.21982e-09	1.76465e-19	5.20226e-05	0	0	0	0	0	0	2.47405e-17	0.0475239	3.26971e-19	0	0	0.109164	0	0
assembly11354_1101bp	0	0.330516	1.55793	1.58699e-05	0	0	0.143872	0	0.162058	0	0.0343806	0.0324669	0.36967	0	0	0	0.142275	0
assembly11355_901bp	3.25243	1.0711	2.16181	0.77274	1.11644	3.76111	5.32786	2.64105	2.09517	1.74918	1.50514	2.06085	1.2823	1.89404	1.88101	2.27901	2.23637	1.08356
assembly11356_566bp	24.9326	19.0254	16.1694	9.25111	26.2682	6.6228	13.1588	27.1443	19.7988	25.0294	23.2046	23.5202	24.0201	22.9593	21.7826	32.5614	16.6574	17.3843
assembly11357_305bp	0	0	0	0	0	0	0	0	0	0	0	0	0	0	0	0	0	0
assembly11358_566bp	7.40848e-56	2.92232	6.74041	0.817656	2.50219e-47	3.04871	6.97244	3.21015e-28	1.67877	4.53126e-67	3.86631	0.43643	0.325289	0	0.560128	0.110665	4.2273	0.860629
assembly11359_1457bp	9.3821	7.76249	6.47421	7.40872	11.9953	5.59716	6.51609	8.82114	5.12192	9.97128	7.02788	7.70896	4.22916	5.39805	6.90766	9.56042	6.32878	7.53717
assembly1135_985bp	8.5003	3.93101	3.63844	4.05631	3.23392	3.99097	3.61541	6.05743	1.12012	5.71046	1.17537	5.22982	3.77335	2.90691	2.13734	3.10574	3.30207	2.85641
assembly11360_1277bp	4.26679	6.09441	3.87206	4.68573	5.50398	6.942	5.95238	4.88483	5.8466	4.64761	4.28559	8.41398	6.80118	8.44538	3.42976	4.38832	8.15383	4.62888
assembly11361_1712bp	305.808	322.782	289.123	226.705	240.87	231.34	208.743	264.705	332.787	275.911	219.181	196.297	130.675	262.563	192.567	239.504	234.506	175.522
assembly11362_569bp	0	0	0	0	0	0	0	0	0	0	0	0	0	0	0	0	0	0
assembly11363_793bp	0	0	0	0	0	0	0	0	0	0	0	0	0	0	0	0	0.153617	0
assembly11364_692bp	432.191	391.994	358.986	93.775	67.6537	113.884	149.869	350.176	177.223	274.26	168.411	286.163	133.874	129.519	83.9081	225.564	133.119	75.8293
assembly11365_382bp	1.92144	1.04079	0	4.73145	1.81452	1.07166	3.92525	2.16276	0	1.78014	0	0	0.862378	0	1.92035	2.26921	0	3.19792
assembly11366_671bp	11.8389	4.43699	3.09432	8.59722	10.4506	14.8491	7.10809	11.3591	6.38913	10.2035	6.2002	7.78252	11.2284	9.31978	13.148	10.6486	7.99399	10.841
assembly11367_816bp	4.13356	2.01138	1.89414	0.825107	2.17328	4.84832e-05	0.00355774	1.60779	1.71608	0.743061	2.89635	1.1976	0.18291	2.91754	0.0737174	2.58137	1.57221	5.32575e-15
assembly11368_739bp	4.51204	1.943	1.72769	2.14358	6.50151	4.15099	1.24659	3.83982	3.50033	5.49526	1.50348	6.9543	2.76581	8.86787	4.55239	4.48908	3.66013	2.30506
assembly11369_465bp	9.27048	10.1425	11.1759	19.5358	20.4161	14.4017	6.14041	11.8405	13.5448	10.906	10.7463	7.60255	8.75477	8.33112	13.3459	12.2882	10.7722	17.2659
assembly1136_1282bp	0	0.116261	0.122007	0	0	0	0	0	0	0	0	0	0.492284	0	0.331172	0	0.216573	0
assembly11370_499bp	0.461576	0.553083	1.25636e-32	0.501155	0.450837	0.546294	0	1.07071	3.53362e-40	0.872046	0	2.43661	1.29367	2.86379	1.95139	1.9175	1.02677	2.26034
assembly11371_599bp	0	0	0	0	0	0.277187	0	0.406544	0	0	0	0	0	0.266427	0.249871	0.449241	0	0
assembly11372_4403bp	0.271301	0.349259	0.251194	0.336189	0.570762	0.405776	0.314451	0.427108	0.269544	0.355505	0.682289	0.378479	0.257887	0.513459	0.425096	0.692878	0.290375	0.403714
assembly11373_1042bp	0.537394	2.40179e-43	0.208346	0.0924456	0.10406	2.50499e-20	0.743983	0.608421	2.41671e-21	0.28369	0.777273	0.107235	1.57925	0.592215	1.54136	0.120273	0.273445	0.38636
assembly11374_1075bp	0.426401	0.693458	0.548839	0.706064	0	0.180824	0.163553	0.635182	1.94021	0.167322	0.787485	0.85874	1.73656	2.11754	0.941048	1.3257	2.0843	0.420915
assembly11375_1955bp	7.43001	5.16418	4.98796	7.69662	6.94576	7.62693	5.33904	7.96717	5.55242	6.78861	3.71132	3.86875	4.80704	6.93954	2.54052	7.5491	4.5953	3.8117
assembly11376_408bp	5.60945	7.62646e-19	1.21972e-20	1.84196	1.8782	4.21347	0.641159	0.747537	9.51138e-22	3.81312	2.15522e-20	3.29126e-20	4.93548e-23	6.09775	2.60339e-06	0.557036	1.34094	3.61636e-16
assembly11377_446bp	1.1662	7.87112e-12	0.335754	0	0.599245	0.586345	0	1.86327	0	2.32518e-23	0.654284	9.17338e-16	0.492169	1.89802	0	1.38008	0	0
assembly11378_665bp	0	0.863258	0.200376	0.38409	1.37085e-19	0	0	1.15496	0	0.779053	0.486127	0.935197	0	0.870077	0	0.241682	0	0.421919
assembly11379_408bp	0.933	0	0	0.89363	1.94024	0	0	0	0	0	0	0	0	2.0619	0	1.14542	0	0
assembly1137_1093bp	41.9239	50.6012	44.4252	47.7887	45.8929	45.2507	48.0653	36.8793	41.1918	44.2468	56.9344	51.3058	42.8162	32.4015	49.4	42.4806	41.9204	51.6504
assembly11380_989bp	0.148094	0.486378	1.19345	0.911209	0.152032	0.702897	0	0.473727	0.177286	0	0.189972	0.348989	0.272223	0	0.151124	0.174945	0.885348	0
assembly11381_685bp	0.20944	1.05486	2.45063	0.189801	0	1.31331	0.799082	0	0.223322	0	1.22129	0	0	0.433398	0.403313	0.24962	0.973135	0.425114
assembly11382_424bp	3.7456	0	1.63016	1.95556	0.000976315	1.63443	11.4417	11.7329	8.38696	2.30647	10.5315	12.0051	13.6488	12.8465	13.9983	6.65934	11.6236	6.06314
assembly11383_595bp	1.51129e-17	0	0	1.34921e-10	1.71054	9.05016e-14	1.67396e-19	2.14025	0.65311	0.920775	5.63103e-21	9.76274e-10	0.504522	6.44045e-06	2.04941e-05	2.08246	2.37351e-15	1.15059e-21
assembly11384_698bp	0.446174	0.490417	0	0.50803	0.912357	7.40535e-14	1.85163	0.716588	0.530051	0.397426	5.63438e-24	4.86816e-20	1.74727	3.28162	2.6022e-10	0.00494399	6.08068e-23	1.43737e-61
assembly11385_989bp	12.8752	11.9698	14.0844	15.6808	11.9018	18.9461	15.3039	14.5761	15.4341	9.74665	14.3059	17.9074	18.2772	14.7955	16.4708	13.6119	16.8767	18.5503
assembly11386_1122bp	0.549584	8.34386	3.4969	4.50732	3.54009	5.66854	2.77828	1.34431	0.269441	0.856291	1.62241	0.711179	0.572429	1.67694	4.4392	3.19035	2.88208	1.69779
assembly11387_2063bp	0	0.119386	0.316445	0	0	0.126888	0.349295	0	0.19495	0.0523622	0.278723	0	0	0	0	0	0.111515	0
assembly11388_417bp	0.639684	0	0	0	0.621918	0.796106	0	0	0	0	0	0	0	1.33046	1.4054	1.15145	0	1.62297
assembly11389_314bp	0	1.38522	0	5.06472	1.06101	0	0	2.74115	0	0	0	0	2.26713	1.26479	1.3442	0	0	0
assembly1138_512bp	1.29181e-18	0	0.754132	0	0	0	0	0	8.37547e-51	0	2.92006e-22	0	4.44735e-21	0.0245718	0	9.09519e-09	1.09253e-24	0
assembly11390_316bp	0	1.75737	0	5.25673	4.66688	3.87374	3.26466	3.81047	0	5.63147	0	2.08969	0	1.73614	3.53902	1.95083	3.44804	1.91116
assembly11391_396bp	3.24671	0	0.772409	2.02682	3.62342	1.54226	5.66375	1.01465	4.87269	2.91377	2.56313	0	0.609284	3.42139	0.700932	4.63059	0.69748	0
assembly11392_357bp	0	0	0	0	0	0	0	0	0	0	0	0	0	0	0	0	0	0
assembly11393_1548bp	0.885144	1.59111	1.16264	0.631565	0.276616	0.579316	2.3769	1.55	1.11958	1.75954	3.16726	1.6574	1.80282	1.51496	1.42764	1.39024	1.40366	1.38987
assembly11394_624bp	0.697233	1.10669	1.55886	2.66891	1.10164	4.56433	1.446	1.41415	0.7949	2.26884	4.66499	2.00028	1.25815	0.748505	1.39775	2.04585	2.10915	1.10791
assembly11395_462bp	3.42804	5.11763	0.760042	4.12236	6.2413	7.79818	2.82044	2.22441	6.31802	6.42196	1.66528	6.59498	5.71654	2.95597	4.18582	6.14269	2.80084	5.43026
assembly11396_1036bp	3.55258	2.64657	2.13466	4.86522	4.39518	2.7536	3.87171	2.66198	2.66356	4.26157	5.47932	3.35908	2.98952	3.40376	3.07191	3.36587	4.27963	0.963515
assembly11397_1718bp	2.17154	0.407647	0.753565	0.578658	1.48888	1.72009	1.34119	1.5212	1.13837	1.96637	0.852159	1.80149	0.870753	1.65264	0.482959	1.38995	0.29178	4.33501
assembly11398_845bp	2.28323	0.33783	2.06606	4.11658	4.47808	7.97443	0.45925	4.66107	0.964926	2.26811	1.06954	8.76618	2.9616	3.02625	2.54245	2.01736	4.32386	3.58822
assembly11399_1061bp	9.03653	5.8952	5.55383	6.03545	7.21615	2.0513	9.14211	7.23744	4.80094	6.39886	3.87824	0.427614	2.98789	6.79332	4.45697	9.16872	2.52779	3.0551
assembly1139_677bp	0.545995	0.403311	0.284627	0	0	0	0.250841	0.542541	0.41236	0.24746	0.931205	0.892663	0.438417	0.54544	0	0.870758	0.758124	0.130252
assembly113_318bp	0	0	0	1.92958	1.70019	0	0	4.2151	0	4.77254	0	0	0	0	4.02684	2.17363	0	2.11039
assembly11400_1136bp	0.0303147	7.67709e-12	0.190083	3.38451e-16	6.80369e-49	0.0460457	0.213499	5.39194e-20	0.0467491	2.19724e-14	0.158531	1.02987e-20	0.00746165	0.125269	9.95831e-11	0.000270834	0.16035	0.00369188
assembly11401_954bp	0.223633	0.760624	0.421121	0.148298	8.6959e-07	0.0472769	0.218503	0.142241	0.0527443	0.495661	0.179553	0.0959741	0.0982209	0.324836	5.13528e-12	0.104867	0.000527038	0.0897686
assembly11402_854bp	0.386353	0.551932	0.138237	0.200392	0.206486	1.16923e-12	0.246016	0.402225	0.230581	0.00051383	0.234463	0.117353	0.126793	0.543513	0.0966097	0.651662	0.00351305	0.0995166
assembly11403_1036bp	0.0361283	0.198308	0.0196976	3.89878e-16	1.97663e-17	1.13067e-12	0.234603	9.50736e-19	0.200653	1.26921e-16	0.19965	1.13597e-20	0.00861107	0.194176	0.55607	3.95388e-23	0.632183	0.00405952
assembly11404_557bp	2.04424	1.55116	1.30877	0.58139	0.281661	1.61845	0	1.32401	1.72783	0.800311	0	1.03467	1.03848	0.609324	1.74606	1.181	0.578995	0.658959
assembly11405_517bp	0	0	0	0	0	0	0	0	0	0	0	0	0	0	0	0	0.668913	0
assembly11406_638bp	0	1.00318	2.14341	1.80858	0	2.78599	0.645313	0	1.08793	0	0.381086	0	0.819068	0	0.616684	0	2.79835	0
assembly11407_542bp	0	0	1.78051	0	0	0.443007	4.85093	0	0	0	0	0	0.352876	0	0.789694	0	0.387437	0
assembly11408_1468bp	0.288258	0.626265	0.16461	1.53531	3.25916	1.23369	1.07693	2.37013	0.254675	0.735142	0.459234	0.891434	0.260796	1.12509	0.291209	0.954736	1.24327	1.5644
assembly11409_627bp	2.51646	1.61313	1.77591	8.52172	9.87089	4.41213	2.69319	9.86643	0.215708	7.81542	4.26848	2.81405	1.35588	5.79449	1.57034	2.04849	8.59485	2.33812
assembly1140_491bp	1.51678e-18	0	1.85708e-16	0	0	0	0	0	1.69925e-49	0	3.11911e-22	0	6.0254e-21	0.0309026	0	1.06757e-08	0	0
assembly11410_1056bp	0	0.352038	0.249517	0	0	0.248058	0	0	0.382126	0	0.136692	0	0	0	0.109679	0	0.436008	0
assembly11411_772bp	0	0.195626	0.205127	0	0	0.416561	0	0	0.42673	0	0	0	0.321776	0	0	8.54083e-82	0.548232	0
assembly11412_1890bp	0	0.0594802	0.392426	0.0756332	0	7.05004e-07	8.99378e-11	0	0.044461	0	0.00310085	0.0134638	0	0	0	0	0.0777918	0
assembly11413_2065bp	0	0.0439265	2.74868e-17	0.0495674	0	5.44384e-07	0.143075	0	8.46832e-16	0	0.477907	0.012069	0	0	0	0	0.0565751	0
assembly11414_1980bp	0	0.0536035	1.60164e-11	0.0634198	0	6.24583e-07	8.58835e-11	0	0.0402571	0	0.0726584	0.0128667	0	0	0	0	0.0682874	0
assembly11415_2034bp	0	0.0445015	0.221925	0.0517939	0	5.63603e-07	8.11945e-11	0	0.0362176	0	0.00177108	0.012149	0	0	0	0	4.15315e-11	0
assembly11416_2209bp	0	0.0338096	2.2262e-17	0.0354509	0	0.26344	0.116052	0	7.74581e-16	0	0.248124	0.0109954	0	0	0	0	3.76008e-11	0
assembly11417_2124bp	0	0.0391754	9.97631e-12	0.0443329	0	5.02825e-07	7.78319e-11	0	0.0332099	0	0.0388005	0.0116385	0	0	0	0	3.9831e-11	0
assembly11418_1222bp	30.5557	30.1361	34.4399	30.3533	31.715	28.2797	34.9364	35.9284	30.6299	30.378	33.4399	30.7971	38.5679	23.9951	31.2488	31.6145	33.077	35.3832
assembly11419_1887bp	0.0282038	1.03249e-13	0.00106309	0.106301	0	2.39238e-16	3.08655e-06	0.0122783	0	0	3.18769e-16	0	2.65897e-23	4.50231e-08	8.64854e-09	0	0.000138202	0.084887
assembly1141_409bp	0	0	0	0	0	0	0	4.32345e-39	0.369774	0	0	0	0.572881	0	0	0	0	0
assembly11420_1284bp	0.0482088	1.51465e-10	6.59905e-07	0.0110952	0	5.42652e-14	0.116527	0.0169916	4.44737e-08	0	0.521086	0.121787	1.32439e-11	6.24281e-08	2.07236e-08	0	0.00300857	0
assembly11421_1392bp	0.0431735	0.729523	1.60309	0.0101868	0	1.14003	0.322323	0.0160927	0.230367	0	0.140801	0.117858	0.357271	0.177904	0.181751	0	0.188064	0
assembly11422_1995bp	0.0262908	0.895144	0.00473916	0.0963707	0	0.67313	0.455464	0.0118135	0	0	0.0921551	0	2.54758e-23	2.57476e-06	0.0622001	0	0.516154	0
assembly11423_1496bp	0.0369225	8.77507e-09	0.474663	0.00854905	0	0.00740081	2.67312e-19	0.0143099	1.45542e-12	0	0.0941711	0.0998589	3.29453e-13	0.126917	0.124316	0	0.00625093	0
assembly11424_454bp	0	1.48694	0.391626	0.000892972	0	3.28851e-06	2.34805e-07	0	5.37054e-43	0	2.13808	0	0	0.369732	1.85184	0	1.04661	0.133411
assembly11425_785bp	0	0.298946	0.157117	0.43615	0	1.38839	0.869421	0	0.0797227	0	1.38148e-05	0	0	0	7.61928e-22	0	2.73078e-09	0.0519521
assembly11426_568bp	0	0.239647	0.249763	0.180917	0	0.000320883	1.51002e-07	0	0.128931	0	5.66418e-05	0	0.200608	0	1.87421e-21	0	0.221842	0.0833133
assembly11427_1053bp	0	0	0	0	0	0	0	0	0	0	0.149873	0	0	0	0	0	0	0
assembly11428_403bp	0	0	0	0	0	0	0	0	0	0	0	0	0	0	0	0	0	0
assembly11429_1772bp	0	8.57049e-05	0.835101	0.0332326	0	0.00733611	0.152275	0	0.239966	0	0.000485053	0.0382331	0.269052	0	0.298176	0	0.165164	0
assembly1142_636bp	0	0	0	0	0.338216	1.55835	0	0.531584	0.205566	0.617862	0	0	3.38848e-26	0	0	0	0	0
assembly11430_1868bp	0	0.340107	0.538888	0.029259	0	4.9624e-16	0.120224	0	0.0520314	0	0.217267	0.0339425	3.66055e-22	0	3.76008e-15	0.0489828	0.00204863	0
assembly11431_1868bp	0	0.343707	0.0462229	0.0300319	0	0.516494	0.126366	0	0.0545859	0	0.237051	0.03482	0	0	3.85867e-15	0	0.124446	0
assembly11432_1171bp	55.9474	63.2685	58.2771	46.6372	44.2452	43.9365	49.878	52.9817	59.3687	56.6584	64.0729	62.2294	50.8826	52.1997	61.3132	58.5229	52.7853	56.5438
assembly11433_4766bp	0.0264653	0.490928	0.637328	0.216956	0.0806441	0.476445	0.224821	0.0102645	0.189044	5.68739e-23	0.707639	0.0155325	0.193524	0	0.0808104	0.0303893	0.59337	0
assembly11434_2484bp	0.132098	0.237759	0.446777	0.222788	0.0451667	0.12806	0.267062	0.0175245	0.101026	0.165343	0.217933	0.025475	0.195657	0.13816	0.308293	0.128804	0.227604	0
assembly11435_564bp	0	0	0	0	0	0	0	0	0	0	0	0	0	0	0	0	0	0
assembly11436_349bp	0	1.21765	0	0	0	0	1.19487	0	0	0	0	0	0	0	0	0	0	0
assembly11437_427bp	0	0	0	0	0	0	0	0	0	0	0	0	0	0	0	0	0	0
assembly11438_368bp	7.00789	4.90368	1.24567	9.08361	12.4183	3.87173	2.33712	5.59642	6.52085	14.459	7.02864	6.6333	12.8506	10.4241	15.4529	12.0675	5.6808	7.98402
assembly11439_422bp	7.0494	9.0225	8.3037	4.20887	6.76989	3.73019	8.40218	8.01965	18.6093	6.11612	8.30937	9.06703	9.47587	10.5922	4.75422	9.57944	8.14138	4.09574
assembly1143_1055bp	0.788397	0.355249	0	0	0	0.380317	0	0.125587	0	0	0.207239	0.769689	0.449737	0.660167	0	0.552142	0	0
assembly11440_318bp	0	1.62037	0	0	0	0	0	0	0	0	0	0	0	0	0	0.799947	0	0
assembly11441_520bp	0	0	0	0	0	0	0	0	0.465719	0	0	0.453912	0.676537	0	0	0	0	0
assembly11442_416bp	5.70131	3.37841	3.96335	5.33111	3.77056	5.77233	3.24597	2.86037	2.18316	6.95226	2.35763	2.34305	3.62904	2.14513	1.29606	6.5301	2.26657	1.71489
assembly11443_374bp	1.54843	0	0	0	0	0	0	1.21803	0	1.39492	0	0	0	1.60897	0	4.57901	0	0
assembly11444_466bp	0	0	1.29458e-40	0	0	0	0	0	0	0	0	0	0.424659	0	0	0	0.478381	0
assembly11445_564bp	0	0	0	0	0	0	0	0	0	0	0	0	0	0	0	0	0	0
assembly11446_355bp	0	0.554402	0	0	0.502801	0.599357	1.02286	0.433141	0	0	0	0	0	0.583345	0	0.335632	0.504295	0.571122
assembly11447_311bp	0	0	0	0	0	0	0	0	0	0	0	0	0	0	0	0	0	0
assembly11448_425bp	8.82746	5.03616	4.93746	5.5866	5.46694	4.01837	0.858873	6.3002	2.52712	8.14841	1.06334	6.78663	5.40391	9.9225	9.35332	7.23908	4.45375	6.51421
assembly11449_391bp	0.814477	3.62777	0.959258	1.68061	4.6746	0.958129	1.73968	3.13595	1.98098	1.44056	2.14194	1.01866	3.752	5.83622	1.71384	1.92863	8.39879	3.02487
assembly1144_1288bp	2.24239	1.86162	1.35844	0.976116	0.725476	1.5346	0.19498	0.637608	0.756062	0.938834	1.50944	1.17206	0.32368	0.579994	0.178197	1.29398	1.00101	0.514011
assembly11450_360bp	0	0	0	0	0	0	0	0	0	0	0	0	0	0	0	0	0	0
assembly11451_315bp	1.47862	4.94045	3.50723	0	0	3.52755	0	2.40023	0	1.35071	9.42045	0	0	1.60612	4.65293	0.923417	0	0
assembly11452_326bp	1.48091	0	0	1.56162	1.34683	0	0	0	0	0	2.03252	0	0	2.98029	0	0	0	1.80893
assembly11453_478bp	16.4173	12.3875	16.6107	11.8185	10.6647	18.3498	12.8069	11.1302	10.8179	11.5376	14.9681	16.7364	18.255	14.6257	19.5469	11.7758	17.1939	15.1523
assembly11454_594bp	0	0	0	0	0	0	0	0	0	0	0	0	0	0	0	0	0	0
assembly11455_347bp	0	0	0	0	0	0	0	0	0	0	0	0	0.310443	0	0	0	0.367366	0
assembly11456_384bp	0	1.78896	0.909507	0	0	0.945355	0	0	0.971073	2.05048	0	0	0	0.799451	0.819406	0.456203	0	0
assembly11457_404bp	0	0	0	0	0	0	0	0	0	0	0	0	0	0	0	0	0	0
assembly11458_422bp	0	0.359829	0.379979	0	0	0	0	0	0	0	0	0	0	0	0	0	0	0.35972
assembly11459_391bp	0	0	0	0	0	0	0	0	0	0	0	0	0	0	0	0	0	0
assembly1145_667bp	23.0952	24.0627	24.4139	36.9838	54.3324	27.6555	56.6913	34.0567	38.6828	25.7709	34.7387	28.502	61.7188	49.0894	82.6338	21.0809	61.982	53.2703
assembly11460_351bp	0	0	0	0	0	0	0	0	0	0	0	0	0	0	0	0	0	0
assembly11461_338bp	0	0	0	0	0	0	0	0	0	0	0	0	0	0	0	0	0	0
assembly11462_311bp	0	0.873499	0.911251	0.826379	0	0	0	0	0	0	0	1.03969	0	0	0	0	0	0
assembly11463_404bp	0	0	0	0	0	0	0	0	0	0	0	0	0	0	0	0	0	0
assembly11464_350bp	0	0	0	0	0	0	0	0	0	0	0	0	0	0	0	0	0	0
assembly11465_318bp	14.9544	3.24747	3.3461	9.34296	4.47929	17.1969	6.14854	3.96792	18.2881	13.4518	7.53415	7.47246	13.1764	12.846	18.1077	13.9895	6.17619	3.62032
assembly11466_364bp	0	0	0	0	0	0	0	1.55039	0	0	0	0	0	0	0	0	0	0
assembly11467_376bp	0	1.1601	0	0	0	0	0	0	0.656842	0	0	0	0	0	0	0	0	0
assembly11468_416bp	10.1877	9.78662	5.24095	7.9372	5.90024	0.740905	2.70967	7.24164	10.074	8.48687	11.4823	11.0508	7.36493	5.83039	8.09752	11.6803	3.438	8.41542
assembly11469_399bp	3.63829	0	0	1.34613	0	0	0	0	0	0	0	0	0	0	0	0	0	0
assembly1146_895bp	1.30914	1.46183	0.651934	0.112783	0.471117	0.519817	0.238763	0.374072	0.398251	1.30577	0.143766	0.132514	0.100872	0.377719	1.1876e-10	0.212608	0.342938	0.25291
assembly11470_388bp	0	0	0	0	0	0	0	0	0	0	0	0	0	0	0	0	0.734737	0
assembly11471_308bp	0	0	0	0	0	3.86617	0	0	0	1.0071	0	0	0	0	0	0	0	0
assembly11472_487bp	0	0	0	0	0	0	0	0	0	0.454923	0	0	0.436096	0	0	1.18836	0	0
assembly11473_429bp	29.9061	19.6684	18.0948	7.40771	3.35679	4.10972	8.44516	18.2089	8.309	18.8348	8.8465	13.8994	9.11787	12.9238	2.65109	13.0061	8.49586	2.89228
assembly11474_327bp	0	0	0	0	0	0	0	0	0	0	0	0	0	0	0	0	0	0
assembly11475_353bp	0	0	0	0	0	0	0	0	0	0	0	0	0	0	0	0	0	0
assembly11476_342bp	0	0	0	0	0	0	0	0	0	0	0	0	0	0	0	0	0	0
assembly11477_391bp	0	0	1.49142	0	0.6418	0	0	0	0	0	0	0	0	0	0	0	0	0
assembly11478_303bp	0	0	0	0	0	0	0	0	1.15281	0	0	0	0	0	0	0	0	0
assembly11479_451bp	0	1.29458	0.824582	0.481698	0	0.820186	0.973826	0	0.834974	0	0.881454	0.294197	0	0	0.768715	0	0.479102	0.816676
assembly1147_747bp	0.243707	0.363818	0.391721	0.226567	0.244666	0.391096	0	0.0989492	0	0	0.284375	0.262394	0.302942	0.262039	0.231315	0.148279	0	0
assembly11480_533bp	2.163	3.03796	3.18602	2.92945	0	0	3.57747	1.70878	1.33391	1.49062	1.42339	2.03273	0.502538	2.29766	1.72329	4.49798	2.84248	1.29885
assembly11481_366bp	0	0	0	0	0	0.939145	0	0	0	0	0	0	0	1.72352	0	0	0	0
assembly11482_487bp	3.37525	4.84405	4.57288	6.30553	3.12664	5.34815	3.1803	5.43184	2.91988	3.4286	3.67297	4.98241	5.6797	2.60868	4.13843	3.70184	4.55343	2.56161
assembly11483_320bp	0	0	0	0	0	0	0	0	0	0	0	0	0	0	0	0	0	0
assembly11484_314bp	0	0	0	0	0	0	0	0	0	0	0	0	0	0	0	0	0	0
assembly11485_307bp	0	0	0	0	0	0	0	0	0	0	0	0	0	0	0	0	0	0
assembly11486_461bp	0	4.94724	0.859547	0.774054	0	1.78199	1.66292	0	0	0	0	0.871951	0	0	0	0	1.53527	0.893971
assembly11487_526bp	0	0	0	0.916768	4.92288	1.31487	0	0.191463	0	0	0.294896	0.280501	0	0.264469	0	0	0.239498	0
assembly11488_338bp	0	0	0	0	0	0	0	0	0	0	0	0	0	0	0	0	0	0
assembly11489_490bp	0	0	0	0	0	0	0	0	0	0	0	0	0	0	0	0	0	0
assembly1148_1302bp	0	0.416517	0.329244	0.598519	0.302604	0.220928	1.00757	0.0776124	0.346037	0.731838	0	0	0.176487	0.316157	0.596082	0.174159	0.671091	0.326857
assembly11490_474bp	0	0	0	0	0	0	0	0	0	0	0	0	0	0	0	0	0	0
assembly11491_360bp	0	0	0	0	0	0	0	1.25951	1.01254	0	0	0	0	1.64268	0	0	1.78783	0
assembly11492_375bp	3.63717	0	2.19686	0	0.809595	0	0	0.68445	3.60839	0.777046	2.59087	1.19727	1.72254	4.50666	0.988094	0.52286	1.0311	0
assembly11493_530bp	3.32233	0	0	0	0	0.871562	3.28455	1.02259	0	4.20379	0	2.73992	0	0.680119	0	0.784964	1.57132	0.881444
assembly11494_397bp	2.09356	0	0	0	0	0	0	0.771601	1.27139	1.83988	0	3.99653	0	0	1.08757	2.42995	0	1.22708
assembly11495_522bp	0	0	0	0	0	0	0	0	2.36273e-07	0	0	0	0	0	0	0	0	0
assembly11496_400bp	1.1519	0	0	1.30776	0	0	0	0.931252	1.55703	0	0	3.16769	0	1.21067	0	1.43459	0	0
assembly11497_539bp	1.10732	0.896056	2.30714	0	0.733383	0	0	0.58428	0.493003	1.35177	1.05355	0	1.12227	1.56735	0.413342	0.440303	0	0.484273
assembly11498_370bp	7.55189e-56	4.0434	2.07361	6.61675	0	4.5272e-33	3.8784	1.37267	2.23562	1.5602	1.15971	1.15739	1.68619	0.923922	0.961846	1.53554	0.95426	3.21571
assembly11499_515bp	0	0	0	0.296421	0	0	0	0	0	0	0	0	0	0	0	0	0	0
assembly1149_433bp	0	0	0.389015	0	0	0	0	0	0	0	0.848056	0	0	0	0	0	0	0
assembly114_584bp	0	0	0.535487	0.226777	0	0	0.511532	0	0.273052	0	0.885886	0	0.218044	0	0	0	0	0
assembly11500_332bp	0	0	0	0	0	0	0	0	0	0	0	0	0	0	0	0	0	0
assembly11501_561bp	0.285203	2.0553	0	1.65413	0	2.14989e-15	0.565461	0	1.22429	0	0.680283	1.04869e-18	0.252144	0.308285	1.12838	1.40075	0.845044	2.39681
assembly11502_497bp	2.70357	1.35593	0	0.983024	0	2.8296	1.51708	0	2.33938	0	4.40355	4.64018	1.37557	3.54187	3.65588	3.436	2.79761	7.60365
assembly11503_782bp	0.209525	0.240173	0	0.925795	0.645266	0	0.462013	0.170737	0	0.392589	0.823268	0.259458	0.405131	0.890082	0.230699	0.124742	0	0.257639
assembly11504_871bp	0	0.437272	0	0.406785	0.395686	1.14376	0	0.156461	0.238063	0	0.500729	0	0.367242	0.604015	0	0.574889	0	0
assembly11505_734bp	0	0.802682	0.846679	0.293086	0	0.336572	0.916782	0	0.526621	0	1.52728	0	0.27062	0	0	0	1.81402	0.163087
assembly11506_1048bp	13.6855	15.4055	15.2422	30.9733	44.1099	20.7863	17.9149	21.0552	17.9831	16.3103	15.3065	16.5069	21.6039	21.1611	22.5528	19.0196	22.7669	30.3086
assembly11507_878bp	0	0.254696	0.527404	0.118763	0	0.407839	0.694255	0	0.135329	0.117633	0.571533	0.410774	0.20946	0	0.480803	0.0757205	0.232498	0
assembly11508_470bp	0	0	0	0	0	0	0	0	0	0	0	0	0	0	0	0	1.95315	0
assembly11509_505bp	0	0.830543	0	0.00244114	0	0.457448	1.62158	0	0	0	0	0.471171	0	0	0	0	1.19965	0
assembly1150_388bp	0	0	0	1.54741	0	0	1.53179	0	0	0	0	0	0	0	0	0	0	0
assembly11510_395bp	0	0.000828557	1.2843	0.00355096	0	9.54829e-17	9.47499e-08	0	0	0	0	0	0	0	0	0	2.73184e-06	0
assembly11511_300bp	0	0	0	2.01579	0	2.23323	0	0	0	0	0	0	0	2.31644	0	0	2.10982	0
assembly11512_395bp	9.41792	1.42115	1.45205	5.19941	4.26954	14.9074	8.30084	5.18824	1.55743	7.70423	1.65533	0	0	9.74415	7.67691	4.55736	0	4.65337
assembly11513_1581bp	24.504	25.6446	26.0135	18.8718	14.3054	19.8168	19.29	25.2642	23.165	23.9555	23.6887	19.1844	27.3569	35.1086	24.7277	29.7367	21.2755	20.3563
assembly11514_1108bp	51.2505	63.8421	63.8462	114.043	77.989	106.658	83.9841	88.242	72.171	80.2689	72.7351	81.7245	120.595	62.6622	56.409	97.6073	112.059	100.593
assembly11515_1989bp	19.0504	28.8991	23.6363	44.8502	58.0253	64.9024	14.4845	32.0665	17.7858	39.4745	23.9634	29.7764	21.6414	37.1422	22.3367	41.2236	33.8584	25.6844
assembly11516_1808bp	0	9.07154	13.3724	2.67839	0.204311	3.94257	7.16272	0.106205	2.26756	0.314535	10.9898	2.52989	1.65839	0.0717119	1.57545	0.079628	5.40109	2.55928
assembly11517_350bp	0	3.60031	4.40013	0	0	0	1.73479	0	0	0	1.04155	0	0.381201	0	0	0	0	0.466127
assembly11518_387bp	50.43	58.5771	96.1164	288.862	241.748	230.028	474.49	342.966	355.68	159.392	160.001	145.01	400.871	822.742	497.08	182.696	489.888	431.558
assembly11519_1019bp	0	0.143139	0.300753	0	0	0.7409	0	0	0.460151	0	0	0	0	0	0	0	0	0.145946
assembly1151_3024bp	0	0.0205597	0.0079376	2.79539e-14	0.0125313	0.0276594	0.184034	0	0.00829195	0.0112459	0.0476097	0.0408893	0.002734	0.0128878	0.0690546	0.0329849	8.22109e-12	0.000190453
assembly11520_833bp	0.618166	0.213451	1.26271e-10	0.195754	3.78588	3.16604	8.58599e-15	0.718138	1.27967	1.7725e-22	1.28306e-06	0.00109743	0.504239	3.23509e-24	0.384459	0.104669	8.53606e-17	8.75033e-05
assembly11521_552bp	4.25612	3.92777	7.45371	8.09492	3.26967	6.60445	6.47754	5.38346	4.42113	1.40586	2.10848	1.98723	0.000933753	0.808222	2.1746	2.25955	4.51449	0.958745
assembly11522_376bp	34.912	37.8666	30.595	33.9102	28.4943	28.7267	29.0989	32.9014	26.7817	35.6299	33.9077	35.871	28.0693	23.5116	27.3525	28.3028	32.6806	28.1202
assembly11523_1882bp	0.0625431	0.336603	0.283618	0.122893	0	0.140901	0.131651	0.0486025	0.364784	0	0.550615	0.0722758	0.10944	0.194351	0.373598	0	0.185956	0
assembly11524_527bp	0	0	0	0	0	0	0	0	0.33153	0.233063	0	0	0.472955	0.537288	0.270095	0.314051	0	0
assembly11525_493bp	1.33056	4.80016	1.13446	1.68042	0.312142	1.90154	5.13476e-19	1.22898	1.57914	1.56444	0.995226	1.22742	1.09672	0.352248	1.3519	3.43338	2.06359	1.50028
assembly11526_431bp	0.794574	1.71559	0.441821	9.99113e-43	0.405883	2.21353	1.62305	0.144486	1.17333e-05	1.05837e-07	1.32535	0.959711	0.108284	1.25752	0	0.726274	0.395644	0.436883
assembly11527_379bp	0	0	0	0	0	0	0	0	0	0	0	0	0	0	0	0	0	0
assembly11528_839bp	14.0472	11.4368	15.0201	30.7334	32.4438	21.8448	20.7232	21.2465	22.3772	11.8922	14.0394	14.3885	29.8179	22.1157	26.4712	16.0858	19.3414	19.1813
assembly11529_911bp	70.3222	70.8063	62.7987	35.0619	46.9942	37.3643	32.7714	55.6349	26.9074	100.985	41.6705	73.8826	51.2679	49.1044	23.4356	89.7479	58.9442	42.7773
assembly1152_2830bp	0	0.433225	0.26647	0.00115344	0.0132903	0.221992	0.278143	0	0.0106566	0.0119575	0.48442	0.0475907	0.0542275	0.01368	0.0921938	0.0437415	0.629154	0.151052
assembly11530_1507bp	0	0.158857	0.166798	0.290048	0.0771722	0.414735	0.309049	0.238794	0.259411	0.0693353	0.18415	0	0.132942	0.0801189	0.147596	0	0.368603	0
assembly11531_3065bp	8.72577	9.89908	8.62195	11.3184	10.21	10.4321	9.35365	7.00314	8.54813	8.0196	8.9333	7.16997	8.53285	8.60426	8.31197	8.19786	7.84203	7.05995
assembly11532_1063bp	0.485135	0.532343	0.699457	1.47189	0.978871	0.562195	0.259908	0.875354	0.287373	0.223656	0.153139	0.285391	0.439074	0.757847	0.490187	0.494255	0.248608	0.536603
assembly11533_576bp	0	0.355731	0	0	0	0.378433	0.687018	0	0.761746	0	0.40542	0	0	0	0	0	0.666482	0
assembly11534_1931bp	0.572233	0.481225	0.426149	1.2801	0.577016	0.441384	0.529099	0.44029	0.369814	0.57724	0.319202	0.659239	0.682525	0.990779	0.45206	0.577212	0.453342	0.564103
assembly11535_434bp	4.40994	5.20279	0.603344	1.5656	3.12693	3.58821	2.18158	1.33007	2.48901	1.52002	2.63467	1.87566	3.26383	1.73292	0.532378	1.01716	5.33973	2.46387
assembly11536_416bp	0	4.24461	15.3239	0.543019	0	2.50602	0	0	1.97206	0	7.84407	0.676935	1.03597	0	0	0	1.69651	1.80943
assembly11537_370bp	190.157	264.94	252.839	262.052	154.23	241.382	336.346	228.041	313.508	210.66	339.687	292.856	403.086	196.174	343.996	205.393	288.607	241.42
assembly11538_955bp	0	0.439467	0.873486	0.354829	0.3995	0.218339	0	0	0.247066	0	0	0	0.375041	0.405026	0	0.170123	9.97311e-15	0
assembly11539_793bp	0	4.82132e-19	1.90034	0.508337	1.01174e-18	0.271063	0.962949	0	1.09597e-16	0	0	0	0.587454	0	0.22541	0.188271	0.680767	0
assembly1153_3166bp	0	0.0751474	0.154357	0.247028	0.0123431	0.130405	0.167603	0	0.231424	0.0110857	0.219184	0.0390753	0.0434711	0.0126944	0.061636	0.0308264	0.0620885	0.09874
assembly11540_1711bp	5.7073	8.9624	6.58593	8.17447	8.10939	7.23694	7.10773	5.12378	8.18863	6.70134	5.56312	2.93345	6.46237	7.90795	5.08303	9.88518	6.30736	3.49233
assembly11541_1492bp	29.6128	25.8904	29.4039	30.0117	14.7377	38.2045	21.9726	39.6938	22.3285	31.5257	28.3206	27.2545	13.395	26.7212	16.679	37.8367	29.5816	19.1373
assembly11542_841bp	0	2.60626	7.39461	1.92773	0	3.52732	3.12064	0.127813	2.92567	0.457756	2.25437	0.766313	1.17051	7.17047e-70	0.813519	0.195249	4.44018	1.23409
assembly11543_323bp	1.429	0	0	1.60716	1.29844	0	0	1.15431	0	2.51497	0	0	1.43697	0	0	0	0	0
assembly11544_1029bp	0	0	0	0	0	0	0	0	0	0	0	0	0.15415	0	0	0	0	0
assembly11545_451bp	0	0	0	0	0	0	0	0	0	0	0	0	0	0	0	0	0	0
assembly11546_862bp	0.646929	3.69052	2.92077	1.99607	3.55925	3.64804	2.64648	1.15878	1.5008	1.16809	3.46117	2.7808	1.73944	1.7346	3.49181	2.50845	2.99169	0.70535
assembly11547_1138bp	20.9633	23.7623	21.6206	19.9763	10.0053	26.3432	30.1162	28.6054	19.7517	26.0161	26.9123	27.4278	40.6046	31.8186	25.5345	41.8858	30.2495	15.7528
assembly11548_480bp	0	0	0	0	0	0	0	0.359881	0.527515	0	0	0	2.49041	0.952928	0	0	0.897814	0
assembly11549_366bp	3.9299	1.73245	1.24036	4.50924	3.64766	1.27682	4.75357	15.9077	1.30893	4.36691	2.77387	4.02078	4.93953	11.4618	7.91183	11.2067	12.6375	6.55527
assembly1154_1346bp	0	0	0	0	0	0	0	0	0	0	0	0	0	0	0	0	0	0
assembly11550_1305bp	0	2.01189	2.57393	0.685918	0	3.14669	1.8918	0	1.61132	0	2.88578	1.14406	1.32832	0.103113	1.26256	0	2.48013	0.437356
assembly11551_740bp	0	0	0	0	0.114912	0	0	0.0902621	0	4.07861	0	0	0	0	0	0	0	0
assembly11552_2156bp	23.4396	20.0183	18.1886	29.7637	38.0324	24.5166	14.9445	19.424	14.9617	22.8429	13.052	21.3949	12.8111	23.0633	25.1385	17.034	18.7972	21.5703
assembly11553_1062bp	75.2559	88.9297	86.0776	52.1204	51.9762	59.272	80.6255	69.4265	89.7757	69.4833	88.7109	91.254	77.0002	67.2165	100.769	75.8012	77.6986	84.7122
assembly11554_648bp	8.02001	8.2316	10.8906	13.3527	9.28477	11.9553	10.229	10.218	6.42768	7.22153	11.6893	8.06056	10.3301	10.6215	10.5661	10.7859	9.45208	9.34616
assembly11555_1001bp	4.70771	2.60918	5.88457	5.40454	6.31113	2.7437	5.60388	5.49489	4.41622	7.16119	5.56379	4.59569	2.62372	4.89647	7.07779	5.58237	4.90508	5.71399
assembly11556_449bp	0	0	0	0.513829	0	0	0	0	0	0	0	0	0	0	0.521297	0	0	0
assembly11557_857bp	10.1086	10.8299	8.98953	7.58117	5.53448	9.40221	11.4843	6.92182	8.22541	8.25902	11.295	9.60928	12.3034	6.91407	12.2966	9.48254	9.35984	6.01359
assembly11558_881bp	6.94971	7.18644	8.2152	7.85514	7.97478	4.95022	11.3466	8.9101	8.86125	8.91733	17.5321	10.393	24.586	11.5548	27.7373	5.5549	9.55955	16.7434
assembly11559_1363bp	7.07998	7.76995	11.2012	7.80741	7.60894	8.52646	5.9139	8.86072	6.97377	4.60046	5.14099	6.19542	5.68387	6.96657	7.7717	6.85808	6.22106	9.92522
assembly1155_1816bp	0	0.131353	0.5345	0.180394	0	0.274852	0	0	0.107839	0	0.27278	0	0.0548938	0	0.184362	0	0.241952	0.0669219
assembly11560_415bp	0	0.790178	0.839676	0.737933	2.06546	4.16495	0	2.83306	1.7487	0	0	0.874288	0.67429	3.07736	0	3.86061	1.48318	0
assembly11561_720bp	4.24795	2.71081	2.0935	4.16104	4.05811	2.12237	1.36271	4.66873	1.75585	0.986442	2.7273	1.36761	3.45146	1.52772	2.24144	2.46125	2.55413	0.720159
assembly11562_485bp	0	0	0	0	0	0	0	0	0	0	0	0	0	0	0	0	0.823982	0
assembly11563_451bp	0	0	0.674611	0	0	0	0	0	0	0	0	0	0	0	0	0	0	0
assembly11564_682bp	0	0	0	0	0	0	0	0	0	0	0	0	0	0	0.15194	0	0	0
assembly11565_373bp	0	0	0	0	0	0	0	0	0	0	6.39339e-62	0	0	0	0	0	0	0
assembly11566_841bp	0.166544	0.544358	0.576214	0	0.159913	0.191362	0.357809	0.643637	0.199496	0.600878	0.635649	0.390614	0.741059	0.173091	0	0.583865	0.339295	0
assembly11567_1027bp	2.64333	3.47762	2.18432	2.33306	2.85933	3.47815	2.50529	3.20631	1.52059	2.82329	4.93668	4.70197	7.48083	4.21116	7.39593	2.53907	4.27378	3.9027
assembly11568_1205bp	0.202103	0.102174	0.21646	0.538578	0.20616	0.416423	0	0.320874	0.220826	0.0936984	0.238037	0.111443	0.609145	0.324809	0.19162	0.473657	0.85506	0.519038
assembly11569_405bp	0	0.308947	0.675907	0	0.31126	0	0	1.06808	1.02568	0	0.365427	0	1.63027	2.1995	2.07881	0.207325	0	0
assembly1156_1882bp	0	5.98834e-23	0.0177635	1.63363e-08	0	2.29178e-22	0	0	0.103711	0	0.25291	0	0.0534053	0	3.78455e-17	0	7.67401e-22	0.0650183
assembly11570_1005bp	0.853401	2.2186	3.71733	1.20864	0.483415	2.08425	1.01395	0.961461	1.1514	1.6159	2.44313	1.85903	1.50961	1.01781	0.594521	1.81227	2.15408	1.53552
assembly11571_962bp	0.248183	0.517105	0.271412	0.356973	0.257337	0.545425	0.246407	0.995182	0.41078	0.469473	0.902307	0.703445	1.60461	1.98566	1.44381	0.652998	0.610261	1.57766
assembly11572_1692bp	0.172739	0	0	0	0.168732	0	0	9.73242	0	0.0517706	0	0	0	0	0	0	0	0
assembly11573_1274bp	0	0	0.385603	0.118868	0	0.266809	0	0	0.533119	0.105361	0	0	0	0	0	0	0.228778	0
assembly11574_780bp	0	0	0	0	0	0.516098	0	0	0.528601	0	0	0	0	0	0.454808	0	0	0
assembly11575_1622bp	4.84626	4.04108	5.19512	5.47815	7.50227	2.06954	2.81817	5.14104	5.36045	4.8244	2.83546	5.08509	4.5103	5.16944	5.49559	6.84658	3.5399	4.68795
assembly11576_1546bp	21.7724	21.2174	24.943	20.4582	13.1781	21.8012	22.2449	24.6884	19.3669	18.3608	18.2488	18.6517	17.9026	19.0881	15.4816	20.0151	24.9308	17.7818
assembly11577_1399bp	0	0.292161	0.47069	0	0	0.156345	0.296	0	0	0	0.528084	0.081237	0.0626971	0	0	0	0.41067	0.235389
assembly11578_791bp	0.184172	7.27717	5.05236	2.0405	0.89443	5.9912	6.15702	0.14208	2.82148	0	5.93671	1.29555	2.12844	0.191215	1.8435	0.323901	6.04293	1.2513
assembly11579_1948bp	0	1.91013	3.22051	0.304992	0	1.13086	1.68743	0.0476946	0.863597	0	2.49086	0.356714	0.766463	0	0.614468	0.105872	1.91919	0.489443
assembly1157_1358bp	24.8556	34.1071	24.1569	30.4434	34.5544	29.6219	24.125	38.0878	26.9764	22.7342	15.4704	21.249	28.9865	40.3726	34.837	22.846	35.2607	20.8313
assembly11580_1295bp	0.112114	0.697258	1.97016	8.77483e-23	0	0.635188	0.286747	0	1.4442e-19	0.0524928	1.61929	0.323682	1.08195	0	0.219509	0	0.300555	2.85769e-22
assembly11581_1231bp	0	2.13612	3.22177	1.19991	0	1.74544	5.56779	0	2.07836	0.0561018	1.17859	0.605696	2.24095	0	1.31258	0	3.6339	0.391944
assembly11582_2537bp	12.1111	12.6981	14.7197	17.1802	19.5251	16.957	26.7171	24.3353	29.4859	22.4147	34.4945	25.6324	42.6345	46.9734	41.8341	33.0759	48.5173	52.8746
assembly11583_1060bp	119.803	94.4996	93.8681	106.779	110.581	108.47	96.3187	106.18	119.892	100.362	97.287	118.207	118.321	114.452	111.687	120.082	102.47	122.072
assembly11584_1235bp	0	0	0.107086	0	0.0941418	0	0	0	0	0	0	0	0	0	0.0947424	0	0.371383	0
assembly11585_363bp	4.26244e-10	0	2.31961e-12	8.02046e-14	9.69114e-08	1.625e-10	2.37653e-10	1.23961e-20	4.64987	8.65485e-06	0.243376	7.3418e-18	8.21883e-09	1.08844e-10	0	2.33501	2.44337e-20	1.18734
assembly11586_407bp	97.5184	103.128	89.2716	53.9789	65.3438	74.4701	72.6279	97.4444	85.7743	76.6692	59.8294	75.8026	74.0292	79.6115	78.4153	98.6739	58.8614	78.6135
assembly11587_1007bp	0	0.29555	0	0.136577	0	0	0	0	0	0	0	0	0	0	0	0	0.135149	0
assembly11588_1102bp	0	0.404912	0.981604	0.378669	0	1.19355	0.797303	0	0.332479	0	1.18119	0	0.344995	0	0.288625	0	1.2429	0.318378
assembly11589_1375bp	0	1.21398	1.07125	0.438914	0	0.572218	0.130256	0	0.4303	0	1.86673	0.500731	0.227191	0	0.193684	0	0.436479	0.0689929
assembly1158_1438bp	15.818	8.96253	16.841	15.861	13.4239	18.0841	15.247	18.6904	7.99194	15.2014	19.3445	16.8891	15.2576	13.3956	13.1662	27.5915	12.2053	19.0949
assembly11590_410bp	2.99833	0.63823	2.03554	0.588514	1.72713	0.673787	2.35012	1.44503	0.697508	1.65411	0.734572	2.11684	2.6568	2.58521	1.82448	6.58948	0.593025	0
assembly11591_835bp	0	0	0	0	0	0	0	0	0	0	0	0	0	0	0	0	0	0
assembly11592_570bp	4.52323	0	1.91889	0	3.29546	2.03714	0	1.95553	0	2.25336	2.13142	0	1.57597	1.65351	0.893305	0.964571	0.908216	1.035
assembly11593_345bp	0	0	0	0	0	0	0	0	0	0	0	0	0	0	0	0	0	0
assembly11594_954bp	0	0	0	0	0	0.144206	0	0.10447	0	0	0	0	0	0	0	0	0	0
assembly11595_623bp	0.635977	0	0	0	0.193887	0.88649	0	0.314122	0	0	0	0.23463	0	0	0	0	0	0
assembly11596_3378bp	2.3112	3.09079	3.56212	3.16541	1.9032	3.35313	3.6078	2.34492	2.74727	2.45142	3.90829	2.65544	2.39669	2.40895	2.55777	2.26369	2.68399	1.74001
assembly11597_1205bp	0.537653	1.14557	0.778855	0	0.792163	0.308095	0.288333	1.00258	0.48836	1.0882	0.850037	0.960316	1.48364	0.412339	0.269298	0.452779	0.665219	0.773211
assembly11598_3027bp	39.3168	40.0587	34.4487	33.0574	26.4403	37.1253	39.1008	37.6762	34.5562	37.2042	41.7188	37.217	35.2292	37.6568	35.7635	39.9439	39.182	32.6611
assembly11599_1071bp	0	0.0948626	0.596137	0.254655	0	0.196973	0.552694	0.0718988	0	0	0.330823	0	0	0.197886	0.177482	0	0.606343	0.294705
assembly1159_4446bp	0.679561	0.450446	1.18292	0.445603	0.614681	0.669711	0.953769	0.948571	0.404541	0.485552	0.454192	0.245151	0.159872	0.561399	0.303883	0.489708	0.279056	0.28723
assembly115_374bp	0	2.01425	0	0	0	0	0	0	0	0	0	0	0	1.63496	0	0	0	4.41319
assembly11600_1900bp	6.89027	4.18017	4.22116	3.76914	4.29423	4.77987	6.60157	4.7299	5.51378	5.41098	4.6075	7.21444	4.97224	4.50147	5.92852	5.73413	5.17875	4.13227
assembly11601_928bp	10.765	13.5054	12.0862	10.1851	13.3158	12.509	12.735	13.3455	11.0467	10.243	10.6574	11.1604	12.1137	16.4416	9.30354	12.0028	12.5795	10.0725
assembly11602_424bp	0	0	0.582493	0	0	0	0	0	0	0	0	0	0	0	0	0	0	0
assembly11603_1690bp	18.2776	17.3922	15.7511	19.0372	25.0491	19.3011	14.513	17.9936	18.4294	17.6249	17.5036	15.9131	16.3496	18.9693	15.5362	18.6961	16.7749	16.0844
assembly11604_3039bp	14.0458	8.36639	10.3477	15.1967	28.0091	12.5083	9.68845	14.2669	11.4256	12.844	10.8802	11.5248	10.5179	17.263	13.0007	13.6657	11.2421	12.3313
assembly11605_498bp	0	0.454122	2.92003	0.42918	0	0	0	0	0.507055	0	0.543899	0	0.378716	0	0.43282	0	2.99748	0
assembly11606_1539bp	0	1.63929	2.50651	0.153683	0	1.32033	1.75159	0.312316	0.441415	0.147806	0.960186	0.452021	0.0695548	0.0842204	0.393269	0	1.01247	0.167458
assembly11607_526bp	0	1.6259	2.59649	1.51284	0	2.82872	0.518287	0	0.290093	0	1.57007	0	0	0	0.533062	0	2.27708	0
assembly11608_460bp	0	0	0	0	0	0	0	0	0	0	0	0	0	0	0	0	0	0
assembly11609_727bp	0	9.82997e-05	2.77957	0.208138	0	0.958543	0.855162	0	0.969904	0	1.31565e-90	0	0.549563	0	2.32773e-06	0	0.838288	0.459154
assembly1160_1098bp	0.122136	2.85256	3.6111	0.840989	0	1.20198	2.74943	0	0.705777	0.113559	2.52113	0.990553	1.20121	0	0.733892	0.0716005	2.41808	0.658775
assembly11610_376bp	0	0	0	0	0	0	0	0	0	0	0	0	0	0	0	0	0	0
assembly11611_347bp	2.33934	1.3342	0.93079	3.65949	5.58017	1.42898	1.00963e-17	9.24931	1.82995	2.17386	1.48299	2.6295	1.86692	3.71283	0.0132611	3.78172	1.89209	2.26341
assembly11612_425bp	3.01365	6.25236	3.83289	4.88384	10.46	5.94153	9.13596	9.15993	6.08603	3.15782	3.27547	2.51981	3.69263	9.64875	9.29162	7.30319	3.76863	2.59409
assembly11613_1036bp	0	2.74993e-38	0.00393223	0.235157	0	0.538954	0.164489	0	0	0	0.0973877	0	0	0	0.144756	0	0.15447	0
assembly11614_954bp	0	0.364572	0.952109	0.265164	0	2.57267e-08	0.175199	0	0	0	0.10365	0	0	0	0.180423	0	0.171979	0.190011
assembly11615_484bp	10.6819	9.63786	6.6396	3.91311	5.58157	2.18506	5.22139	4.78476	8.33008	5.11484	7.04678	1.92679	6.1369	8.16432	5.00868	6.07513	8.91172	5.25794
assembly11616_579bp	0.520021	3.24378	1.13245	2.94123e-45	1.07341	2.32871	2.02686	3.01791	1.15916	5.51997	5.167	2.89604	5.14501	7.90509	6.13446	5.64799	2.52722	2.17605
assembly11617_394bp	16.731	9.60951	14.3976	8.29246	8.6193	10.3281	10.3608	17.5659	11.1894	21.1261	12.4084	16.9907	21.905	21.5039	10.0963	15.5876	15.9398	8.63142
assembly11618_560bp	5.41814	6.67683	5.48467	7.02458	8.79875	7.45403	5.16828	6.03567	5.14887	7.70755	8.05413	8.61988	7.87526	10.7274	5.70897	6.77645	6.31761	10.3908
assembly11619_504bp	0.213677	0.824873	0.436407	0.184416	0	0	0	0	0.213839	0.194701	0	0	0	0	0	0.384031	0.56144	0
assembly1161_356bp	0	0.561607	0	0	0	0	0	0	0	0	0	0	0	0	0	0	0	0
assembly11620_685bp	4.97563	5.3056	4.66116	5.62747	5.6376	5.46417	2.43666	4.02861	5.89704	6.77422	3.31069	7.95538	4.09736	7.08075	6.00138	6.3215	3.21556	3.62666
assembly11621_631bp	0	0	1.12605	0	0	0.832221	0	0	0	0	0.916969	0.292803	0	0	0	0	0	0.550507
assembly11622_531bp	1.08542	2.51153	1.1184	6.05275	13.3601	2.18831	0	4.17623	0.380225	0.340207	0.820411	0.792578	2.44341	2.35211	4.12578	0.656934	1.97053	2.03411
assembly11623_361bp	1.63149	3.7717	0	1.73384	1.50972	0	0	0.639722	3.04127	1.47816	4.5454	1.09546	3.0862	0.847657	0	0.498881	0.898391	0
assembly11624_461bp	1.2462	1.44215	0	0	0	0	0	0	0	2.23159	0	0	1.16403	0	0.681608	0.369231	0	0.747275
assembly11625_853bp	2.20528	1.31284	2.41402	1.75578	1.19193	2.2019	0.620406	1.51416	1.36156	4.44318	3.43097	2.13467	2.15968	3.38154	1.77922	3.49508	2.70933	3.38821
assembly11626_1955bp	3.27209	4.61607	5.85386	6.08313	5.39742	5.28675	2.42114	4.48935	3.59684	1.54379	2.80848	2.11206	1.76763	2.20615	1.70291	2.66043	3.20508	3.81297
assembly11627_634bp	8.41079	4.46368	6.18771	2.53904	3.2181	2.04034	7.63751	5.08311	10.564	8.04262	9.21464	12.0593	3.40799	3.56003	4.8587	6.11816	5.62972	3.71027
assembly11628_432bp	19.4696	7.19905	6.79132	11.4223	13.0061	12.7501	4.89397	16.0315	9.84889	9.15746	19.8884	14.3544	8.76067	17.577	13.9865	15.1135	7.0522	13.7698
assembly11629_1555bp	118.081	130.906	132.191	145.723	99.3025	171.351	125.227	92.8167	142.873	135.163	144.315	131.672	126.98	116.537	138.932	122.52	127.997	151.521
assembly1162_2065bp	5.02811	6.36225	8.11902	18.062	30.4727	8.75626	17.2477	33.2241	8.61429	19.3248	9.73736	12.1336	25.1188	26.3967	24.0129	13.6148	39.3859	29.2841
assembly11630_2413bp	0.100711	2.07552	3.49168	1.0539	0	2.03107	1.74298	0.0380937	0.667217	0.090452	1.85444	0.176736	0.822492	0	0.350655	0	1.66872	0.41053
assembly11631_3033bp	0.487431	5.37324	7.76996	3.04418	1.18971	3.63272	5.6015	0.977351	2.51953	1.03733	5.66438	1.07934	2.19901	0.870199	1.9745	0.402424	4.17324	1.7768
assembly11632_385bp	0	0	0	0	0.584166	0.681924	0	0	0	0	0	0	1.64322	1.95956	0	0	0	0
assembly11633_338bp	0	0	0	0	0	0	0	0.764208	0	0.840106	0	0	0	0	0	1.76306	0	0
assembly11634_319bp	0	0	0	0	0	0	0	0	0	0	0	0	0	0	0	8.54808e-38	0	0
assembly11635_635bp	14.3953	8.12102	10.9349	7.2933	23.1263	2.8464	14.8599	23.558	10.5917	27.5372	16.4066	23.5427	5.90191	17.3213	0.684056	10.9466	21.7118	3.09412
assembly11636_428bp	0	0	0	0.451274	0	0	0	0	0	0	0	0	0	0	0	0	0	0
assembly11637_680bp	0.182894	0	0	0	0	0	0	0	0	0	0	0	0	0	0	0	0	0
assembly11638_344bp	0	0	0	0	0.63101	0	0	0	0	0	0	0.830362	0	0.719738	0	0	0	0
assembly11639_480bp	6.42394	2.6149	2.69138	4.96656	2.82455	0.685703	7.63263	3.57954	7.69873	6.34298	5.35812	5.07378	4.80207	7.15252	6.73228	2.70659	1.25846	7.66269
assembly1163_3503bp	1.12375	1.15221	1.45012	1.54251	0.519774	1.02883	1.19286	1.10779	1.11668	0.848513	1.11726	0.953066	1.23567	0.742519	1.44147	0.738509	0.81879	0.888094
assembly11640_531bp	0.580353	0.706167	0.728529	1.37438	0.585695	0	1.38957	0	4.71652	2.14337	3.40042	0	1.17607	0	0.662455	2.73701	0	0.780333
assembly11641_432bp	0.789873	0	0	0	0	2.99814	0	0.667565	2.10173	4.46309	0	0	0	0	0	0.485923	0	0
assembly11642_1154bp	18.6818	15.3943	19.2409	17.0654	15.7061	13.512	19.6113	17.5369	15.831	20.8662	21.9096	16.9754	15.0798	15.6602	15.549	18.4834	17.2961	17.1035
assembly11643_893bp	1.35908	0.389952	1.01736	3.38177	4.0871	3.25041	1.11553	1.71797	4.74854	4.38594	2.48643	1.67469	1.27086	3.16972	2.65465	6.34757	10.8775	5.03689
assembly11644_335bp	2.97918	2.115	1.10854	2.0406	0	3.44029	0	0.799446	2.37796	2.74289	0	2.58715	0.921143	0	3.27484	2.45918	2.0626	0
assembly11645_608bp	0	0.358509	0.377534	0.346985	0	0.780559	0	0.250877	0.394498	0.29331	1.28156	0	0.588776	1.32659	0.335322	0.188524	1.01072	0
assembly11646_371bp	0	0	0	0	0	0	0	3.10699	0	0	0	0	0	0	0	0	0	0
assembly11647_1345bp	68.6092	43.4157	45.6175	9.90686	11.3447	8.73649	37.8507	55.039	53.5991	34.4643	30.0349	34.5332	25.1782	23.6616	27.7492	45.7462	24.1492	32.1665
assembly11648_516bp	0	0	0	0.963702	0.479087	0	1.02158	0.387225	0	0	0	0	1.7749	0	0	1.14594	0.503227	0
assembly11649_888bp	4.65965	2.67463	1.62656	0.0138803	1.53947	3.37925e-15	0.280822	3.35366	1.1924	1.47484	0.359188	0.367009	1.65262	0.165279	1.51678	0.477827	0.00745822	0.00173565
assembly1164_3367bp	3.0211	3.81258	3.09211	2.15434	1.09478	2.41785	2.87854	2.94779	2.96109	2.07515	2.58081	2.32618	3.15919	1.67659	2.52713	2.14649	2.18048	1.84632
assembly11650_620bp	2.49205	2.86998	1.47811	2.15477	2.17251	1.93187	2.336	0.886872	2.17073	2.90962	3.33609	3.89822	0.395351	3.19586	1.5584	4.16089	4.49962	2.11859
assembly11651_368bp	1.34737	0	0.755022	0	0.644209	0	0	0	0	0	0	0	0.602389	0.710275	0	1.20442	0	0
assembly11652_913bp	8.46525	4.45181	6.28119	7.50458	5.66722	6.95418	5.84294	6.06678	4.92445	7.38473	5.85753	6.0748	5.61138	7.13721	5.61646	8.73997	6.0724	6.63311
assembly11653_432bp	0	2.48149	3.70917	0.215521	0.752696	1.25553	4.73943	0	0.263269	0	2.83475	0	0.83706	0	0.239233	0	1.3564	0.238348
assembly11654_714bp	0	0.302582	0.317543	0	0	0	0	0	0	0	0.353907	0	0.755014	0	0	0	0.285089	0.650545
assembly11655_874bp	0	0	0	0	0	0	0	0	0.654392	0	0.665298	0	0	0	0	0	0	0
assembly11656_429bp	0	0	0	6.14752	1.57905	1.99828	0	0	1.04373	0	0	0	0	0	0	0.499941	0.888003	2.89067
assembly11657_840bp	0	0	0.19057	0.333542	0	0.581235	0	0	0	0	0.210651	0.195947	0	0	0	0	0.511649	0
assembly11658_377bp	25.0034	25.0049	19.0134	31.4716	30.1048	19.2152	34.3881	26.0918	18.7974	33.8065	27.9966	23.64	24.8068	26.4951	33.4377	29.6104	32.4403	26.3295
assembly11659_339bp	0	0	0	0	0	0	0	0	0	0	0	0	0	0	0	0	0	0
assembly1165_3327bp	4.56122	5.37879	4.87616	1.59891	1.54543	3.50426	4.06732	4.47581	4.61549	3.09893	3.90286	3.42271	4.86321	2.33748	3.78766	3.40562	3.52054	2.61771
assembly11660_1243bp	0.426146	1.34313	0.00608141	2.45424	2.94668	3.21864	0.0138665	1.36333	1.72481	1.13916	0.703769	0.893967	2.72086	1.62943	1.70394	1.91925	3.08878	1.80908
assembly11661_1160bp	3.30247	3.02504	2.76186	2.32857	1.6384	0.963137	3.1695	2.23196	0.903266	2.46473	1.59518	3.69675	1.61904	4.55837	0.944809	2.81296	0.0158658	2.65277
assembly11662_339bp	0	0	0	0	0	0	0	0	0	0	0	0	0	0	0	0	0	0
assembly11663_786bp	0	0.515177	0.184277	0.15812	0	0.357726	0	0	0	0	0.20262	0	0.28861	0	0	0.0985063	0	0
assembly11664_414bp	13.234	24.8223	19.5395	32.6793	19.4155	22.3135	33.4443	10.201	22.2403	21.5543	30.2816	31.1507	21.8608	11.9261	22.2762	11.4484	18.6518	33.1936
assembly11665_667bp	0	0	0	0	0	0	0	0	0	0	0	0	0.448325	0	0	0	0.24766	0
assembly11666_974bp	52.1504	53.6984	46.9196	43.8042	45.3843	46.1544	42.0148	54.0344	43.511	52.6953	45.7807	52.8235	53.1597	58.7414	53.1519	58.3785	48.2511	50.9272
assembly11667_351bp	1.01567	2.42644	2.48758	1.14659	2.93344	12.5462	2.34509	6.5445	1.32315	3.72936	2.87664	1.3898	0	5.51245	1.14909	6.36494	4.71896	3.95776
assembly11668_454bp	9.44876	1.88387	6.28851	4.86378	5.47264	3.32485	1.74927	4.05057	0.659074	5.24972	1.78649	3.14179	3.34664	3.75162	12.6077	4.3551	1.14729	1.84018
assembly11669_1009bp	0	0.698259	5.78133e-05	0.212131	0	0.00130902	0.217407	0	0.245116	0	0.0300048	0	0.164341	0	0.213445	0.0634934	0	0
assembly1166_425bp	17.7437	9.30177	20.9985	8.70107	7.6942	6.59343	5.96868	11.9721	5.05371	15.1706	9.03061	10.6656	3.86766	9.2134	8.58872	17.3562	2.97365	6.38478
assembly11670_933bp	0	0.10323	0.814781	0.353595	0	0.405206	2.10938e-06	0.0960955	0.140051	0	0.863173	0	0.2423	0.128392	5.29935e-05	0.0718748	0.713943	0
assembly11671_634bp	0	0	0	5.94633	13.6813	1.87357	9.04675	4.60301	7.83387	0	1.5406	0	12.3614	8.20067	24.1989	0.241691	3.97074	1.39468
assembly11672_1077bp	0.567297	0.94582	0.866152	1.36172	1.54834	0.908359	0.922649	1.42045	0.782489	0.621804	1.53326	1.42807	0.401365	0.471174	1.02611	0.930335	0.112007	0.384231
assembly11673_495bp	3.31994	0.950186	5.12842	0	1.66467	0	0	3.27862	0	1.50191	4.32862	1.03921	3.99085	2.55124	0.897871	3.48339	0.874231	0
assembly11674_460bp	0	0	0	0	0	0	0	0	0	0	0	0	0	0	0	0	1.48773	0
assembly11675_554bp	4.01678	1.0743	0.561191	1.51426	1.42101	0.561376	1.04888	1.11194	3.62017	3.00354	0.635746	2.32949	0.445315	0.946614	2.52952	1.63207	0	2.83085
assembly11676_622bp	2.08817e-08	8.65768e-24	1.26809e-14	1.13545e-21	6.2235e-21	0	2.60815e-20	1.46004e-22	7.76523e-20	2.19877e-08	3.252e-09	1.2558e-20	1.91932e-20	0.000276254	6.91931e-06	2.81109e-11	0.0200155	0.00417178
assembly11677_696bp	1.17462	1.78571	0.533552	1.67182	1.83071	1.07318	2.3316	2.00398	1.68426	2.18988	6.26617	0.81662	2.1968	1.22725	1.92758	0.540732	0.0110204	1.06051
assembly11678_598bp	2.11847e-08	1.2935e-16	0.643795	1.11128e-21	0.288289	0.646969	0.232674	0.684019	1.16695e-18	2.45034e-29	0.0154251	1.07798	1.59344	2.18694e-11	6.55941e-06	1.34084	1.39936	0.00372996
assembly11679_561bp	0	0	0	0	0	0	0	0	0	0	0	0	0	0	0	0	0	0
assembly1167_419bp	8.51778	5.39618	7.17645	2.08609	8.05122	5.02687	4.98126	7.01545	5.26235	12.2226	14.1836	4.16121	11.2229	13.9596	2.63849	21.3223	6.79441	6.90872
assembly11680_593bp	0	1.05164	1.65376	0.713242	0	1.08185	1.01901	0	0.856918	0	2.45092	0.293588	0.66806	0	1.72591	0	2.1807	0.266838
assembly11681_478bp	0.58093	0.583647	7.15061e-79	0.834094	0.277305	1.54426	1.00671e-94	0.673503	0.322565	5.98198e-82	6.47142e-80	0	0	0.313573	0.571741	0.863504	1.09503	0.629626
assembly11682_1355bp	0.780614	1.29224	0.942442	0.827001	0.311642	0.515166	19.2415	2.605	11.4853	2.86919	33.9126	14.446	38.3508	25.0899	52.8898	10.6784	23.6042	7.43875
assembly11683_504bp	0	0	0	0	0	0	0	0	1.28984	0.339063	0	0	0	0	1.84822	0.217823	0	0
assembly11684_306bp	0	0	2.77318	0	0	0	0	0	0	0	0.966746	1.03301	0	0	0	0	0	0
assembly11685_547bp	0	0.972126	0	0.217482	0	0.249238	0	0	0.505524	0.46639	0	0	0.20755	0.271244	0.233574	0	0.220901	0
assembly11686_330bp	0	0	0.541751	0	0	0.505541	0	0	0	0	0	0	0	0	0	0	0	0.481369
assembly11687_667bp	0	0	0	0	0	0	0	0	0	0	0	0	0	0	0	0	0	0
assembly11688_425bp	0	0	0	0	0	0	0	0	0	0	0	0	0	0	0	0	0	0
assembly11689_978bp	0	0.167443	0.175597	0.308951	0	0.352601	0	0	0	0	0.193312	0	0	0	0.314224	0	0	0
assembly1168_437bp	30.3942	31.2552	29.1665	115.95	128.252	110.33	32.9655	35.618	44.3239	30.7327	28.6572	30.4246	20.6196	78.0757	22.3738	47.2246	59.227	81.3877
assembly11690_361bp	0	0	0	0	0	0	0	0	0	0	0	0	0	0	0	0	0	0
assembly11691_440bp	0	0.502144	0	0	0	0	0	0	0	0	0	0	0	0	0	0	0	0
assembly11692_384bp	0	0	0.65977	0	0	0	0	0	0	0	0	0	0	0	0	0	0	0
assembly11693_404bp	0	0	0	0	0	0	0	0	0	0	0	0	0	0	0	0	0	0
assembly11694_1167bp	0	0	0	0.171047	0	0	0	0	0	0	0	0	0.153153	0	0.167931	0	0.173691	0
assembly11695_360bp	41.4382	39.8339	29.8565	47.5583	21.776	31.9892	53.6798	37.2913	37.1567	34.138	36.1196	31.894	45.8105	50.4543	31.1203	25.4353	47.0759	21.3973
assembly11696_450bp	12.3775	5.25863	13.5846	6.25733e-08	2.06187	14.4611	14.0879	1.65828	15.1205	2.60684	9.44098	3.05459	4.99334	5.1086	6.60254	7.90272	0.17221	1.88843
assembly11697_354bp	2.25971	4.89545	0.857839	0.781889	1.42824	1.7379	1.53729	2.37135	4.42574	2.6574	7.53665	1.84873	5.3213	0	5.48541	3.19651	1.55338	4.54723
assembly11698_939bp	0	0.234241	0.248315	0	0	0	0	0	0	0	0	0	0	0	0	0	0	0
assembly11699_307bp	0	0	0	0	0	0	0	0	0	0	0	0	0	0	0	0	0	0
assembly1169_807bp	0	0	0	0.183473	0	0	0	0	0.226475	0	0.981484	0	0	0	0	0	0	0
assembly116_454bp	0	0	0	0	0	0	0	0	0	0	0	0	0	0	0	0	0	0
assembly11700_325bp	0	0	0	0	0	0	0	0	0	0	0	0	0	0	0	0	0	0
assembly11701_334bp	0	0	0	0	0	0	0	0	0	0	0	0	0	0	0	0	0	0
assembly11702_338bp	4.09802	1.76304	1.85306	12.9873	30.7087	12.1687	8.7965	12.8724	7.03494	3.16146	0	2.08902	12.0619	12.8768	15.5533	3.58308	14.1592	10.9911
assembly11703_371bp	0	0	0	0	0	0	0	0.598553	0	0	0	0	0	0.800827	0	0	0	0
assembly11704_485bp	0	0	0	0	0	0	0	0	0	0.704688	0	0	0.36809	0	0	0	0	0
assembly11705_329bp	0	0	0	0	0	0	0	0	0	0	0	0	0	0	0	0	0	0
assembly11706_473bp	17.9299	15.2352	13.7879	13.2641	14.3897	14.8657	14.996	16.351	7.51797	16.2321	15.1062	14.6291	10.2091	10.935	16.7557	12.6999	10.5614	8.41152
assembly11707_398bp	0	0	0	0	0	0	0	0	0	0	0	0	0	0	0	0	0	0
assembly11708_318bp	0	0	0	0	0	0	0	0	0	0	0	0	0	0	0	0	0	0
assembly11709_455bp	1.62858	1.29968	0.663615	4.18965	1.09978	0.668075	1.25191	1.31478	2.14735	1.54206	2.94939	2.17488	0	1.74725	3.53726	2.66237	0	0
assembly1170_1002bp	0	0.26755	0	0.0774486	0	0	0.520983	0	0.0958148	0	0.116599	0	0	0	0	0	0	0.265937
assembly11710_485bp	0	0	0	0	0	0	0.598777	0	0	0	0	0	0	0	0	0	0	0
assembly11711_458bp	0	0	0	0	0	0	0	0	0	0	0	0	0	0	0	0	0	0
assembly11712_517bp	0	0.2899	0	8.94714e-74	1.59713e-76	0.926446	0	0	0.635552	0	0	0	0.503086	3.78161e-67	0	0	2.18557e-53	0
assembly11713_706bp	0	0	0	0	0	0	0	0	0	0	0	0	0	0	0	0	0	0
assembly11714_308bp	0	1.13881	1.84454	0.528204	2.52953	2.95175	0	1.77979	0.619853	1.52917	0	0	1.40842	3.71308	1.11649	1.05168	1.0996	0
assembly11715_348bp	0	0	0	0	0	0	0	0	0	0	0	0	0	0	0	0	0	0
assembly11716_775bp	0	0.66419	0	0.194857	0	0.452078	0	0	0	0	0	0	0	0.217761	0	0	0	0.43147
assembly11717_748bp	33.0992	27.2519	39.0185	34.3064	22.6503	32.3389	35.7389	36.5368	37.4451	39.9017	27.9505	44.7693	37.383	30.1155	30.2431	32.6915	36.5092	27.0609
assembly11718_1088bp	0.971546	0.664262	0.950869	1.31848	1.18457	0.926818	0.441535	0.508761	0.364435	0.701021	0.384339	0.607391	0.46051	1.0118	0.624082	1.00176	0.624205	0.572959
assembly11719_1156bp	0	0	0	0	0	0	0	3.65538	0	0	0	0	0	0	0	0	0	0
assembly1171_1504bp	0	0	0.156373	0	0	0	0	0	0	0	0.0890472	0	0	0	0	0.0402608	0	0
assembly11720_418bp	0	1.22033	3.03337	0.375941	0	0	0.777193	0	0	0	0.927806	0.930889	0	0	0	0	0.370812	0
assembly11721_435bp	0	0	0	0	0	0	0	0	0	0	0	0	0	0	0	0	0	0
assembly11722_387bp	0	0	0	0	0	0	0	0	0	0	0	0	0	0	0	0	0	0
assembly11723_438bp	7.13365	2.1027	2.67586	0.774206	7.07447	2.18441	5.65483	2.53561	2.71001	11.7663	1.45404	2.83963	2.09101	8.12943	4.04157	6.10585	1.21104	1.73376
assembly11724_386bp	11.7952	12.8329	10.6552	19.3839	16.1084	14.2949	6.85826	13.9449	11.5776	12.5326	4.78062	10.0472	7.0809	15.6359	5.73455	13.9873	11.6295	9.98306
assembly11725_312bp	1.01865	2.16564	2.26519	1.00919	1.81088e-32	1.15094	3.18708e-19	3.10094	5.90161	2.68012	0	3.92026	0.865149	1.03883	6.02322	2.43696	1.20405e-24	3.1283
assembly11726_551bp	0	0	0	0	0	0.66154	0	0	0	0	0	0	0	0	0	0	0	0
assembly11727_405bp	1.49115	2.48107	0	0.762459	0	0	0	0	0	1.41872	0	0.941079	2.00844	1.58682	1.48817	1.84031	0.784349	0.826808
assembly11728_410bp	0	5.41103	2.83362	0.652746	1.74642	1.442	0	0.475305	0	0.553312	1.62701	0.778413	0	0.646919	0.648387	0	2.53351	0.750737
assembly11729_309bp	16.1282	7.42558	11.4899	8.31245	23.0509	10.2998	10.9904	19.7585	11.4938	20.0187	15.4317	14.6689	3.13338	50.5877	9.93244	25.6032	10.5426	15.1921
assembly1172_705bp	0.431022	0	0	0	0	1.48593	0	0.696386	0	0.201954	0.267455	0	0.189833	0.926664	0.437137	1.54928	0.880255	0
assembly11730_634bp	0.932612	1.01316	2.16506	1.86271	5.76886	1.05236	1.96287	2.99118	0.554665	0	0.585399	0	1.66496	4.88811	4.23414	0.277272	0	0.512709
assembly11731_414bp	0.331506	1.73304	0.724511	2.85633	1.61992	2.97057	1.99548	2.12614	1.50205	2.10562	1.19594	2.72846	2.80156	1.81272	4.19026	1.98342	1.648	2.17908
assembly11732_386bp	0	0	0	0	0	0	0	0	0	0	0	0	0	0	0	0	0	0
assembly11733_318bp	0	0	0	0	0	0	0	0	0	0	0	0	0	0	0	0	0	0
assembly11734_402bp	13.2482	12.2593	9.67748	19.9186	27.0319	13.5319	10.1138	15.7379	8.50634	15.888	10.5133	11.6383	13.8107	13.9939	14.8344	14.9812	10.6214	17.6577
assembly11735_856bp	0.545572	0.335298	0.722274	0.829781	0.636	0.592292	0.649735	0.255464	0.364152	0.199165	0.661682	0.746158	0.560037	0.911836	0.961953	0.57583	0.854423	1.04272
assembly11736_550bp	0	0	0	0	0	0	0	0.505531	0	0	0	0.774144	0	0	0	0.192187	0.336331	0
assembly11737_465bp	5.73371	4.95463	1.912	3.43114	0	0.645968	4.69515	2.5011	0	5.28162	0.724906	0.681655	0.98089	1.08149	2.83697	3.13131	1.73664	1.25084
assembly11738_353bp	0	0	0	0	0	1.83265	0	0	0	0	0	5.86531	0	0	0	0	0	0
assembly11739_420bp	7.28733	5.91306	0	3.70057	2.32948	2.10868	5.90717	1.25312	4.38384	2.14706	2.81632e-67	9.83809	4.94351	2.50822	1.86647	5.14874	0.959077	3.27283
assembly1173_547bp	0	0.272728	0	0.765203	0.254277	0	0	0.615742	0	0.237862	0	0	0	1.13888	0	0.153311	1.05813	0
assembly11740_375bp	0	0	0	1.81448	2.45717	1.013	0	0.662959	0	0	0	0	0	0.88338	0.909523	0	0	0
assembly11741_701bp	0.17914	0.725561	0.580416	0.336307	0	0.391181	0.359428	0.678896	0.198464	0	0.640563	0.402217	0.302589	1.11336	0	0.20515	0.680278	0.372456
assembly11742_606bp	0	0	0	0	0	0	0	0	0	0	0	0	0	0	0	0	0	7.50421e-68
assembly11743_582bp	0	0	0	0	0	0	0	0	0	0	0	0	0	0	0	0	0	0
assembly11744_315bp	0	0	0	0	0	0	0	0	0	0	0	0	0	0	0	0	0	0
assembly11745_588bp	1.18865	2.88185	0.965019	2.75717	0.782536	0.513607	1.86258	4.0608	1.58009	3.22431	0.549632	1.53574	2.71754	2.06188	0.428092	4.48027	0.447047	0.509296
assembly11746_351bp	0	0	0	0	0	0	0	0	0	0	0	0	0	0	0	0	0	0
assembly11747_385bp	0	0	0	0	0	0	0	0	3.33846	0	1.77231	0	0	0	0	2.09827	0	0
assembly11748_451bp	9.41253	6.43457	12.3819	9.38275	11.1958	5.58893	2.30731	11.3978	7.3106	9.50523	6.2123	1.94123	5.30119	2.19237	4.41559	10.8225	3.85432	8.9792
assembly11749_720bp	1.39872	0.387281	1.21408	0	1.12709	0.824094	0	1.44678	0.838597	0.338879	0.444882	0.830981	0.332156	1.50472	0.372137	0.423793	0.372242	0.405103
assembly1174_356bp	0	3.62238e-20	0	0	0	0	0	0	0	0	0	0	4.80991e-19	0	0	0	0	0
assembly11750_395bp	0	0	0	0	0	0	0	0	0	0	0	0	0	0	0	0	0	0
assembly11751_390bp	0	0	0	0	0	0	0	0	0	0	0	0	0	0	0	0	0	0
assembly11752_1228bp	0	1.23815	1.15982	0	0	0.143107	0	0	0.608043	0	0	0	0.117065	0	0	0	0.253318	0
assembly11753_682bp	0	0.879336	0.184886	0.159697	0	0.54923	0	0	0.751453	0.301129	0	0	0.276267	0	0.160198	0	0.160578	0.1794
assembly11754_323bp	0	0	0	0	0	0	0	0	0	0	0	0	0	0	0	0	0	0
assembly11755_923bp	0.24339	0	0	0.370312	0.118464	0	0	0	0	0	0.155986	0.426713	0.52935	0.25005	0.60161	0	0.123627	0
assembly11756_809bp	13.763	12.33	13.4197	16.4509	15.0485	15.2993	17.6078	17.2185	15.3828	14.7819	13.9048	14.5801	14.5823	15.7368	16.0935	17.4203	15.4723	15.1425
assembly11757_390bp	0	0	0	0	0	0	0	0	0	0	0	0	0	0	0	0	0	0
assembly11758_531bp	0	0.732118	0.771185	0	0	1.17505	2.826	0.259576	1.2214	0.302311	0.432862	0	0.621968	1.04877	0	0.786183	0.709804	1.17498
assembly11759_609bp	0	0	0	0	0	0	0	0	0	0	0	0	0	0	0	0	0	0
assembly1175_658bp	0	0.549762	0.412923	0.726039	0	1.67323	0.772293	0	0	0	2.12919e-80	0.426874	0.998891	0	0.364855	0	2.14272	0
assembly11760_653bp	0	0	0	0	0.971746	0	0	0.272614	0	1.49367	8.19767e-17	0.903192	1.39784	0.740809	1.52512	0.406105	0.397758	3.37048e-52
assembly11761_310bp	0	0	0	0	2.01011	0	0	1.67813	0	1.97494	0	0	3.85063	0	0	0	0	0
assembly11762_459bp	0.417861	0	0	0	0	0.498956	0.889829	0.332017	1.0055	0	0	0	0	0	0	0.495698	0	0
assembly11763_361bp	0	0	0	0	0	0	0	0	0	0	0	0	0	0	0	0	0	0
assembly11764_536bp	0	0	0	0	0	0	0	0	0	0	0	0	0	0	0	0	0	0
assembly11765_720bp	0	0.622453	0.211636	0.392678	0	0.657407	0	0	0	0	0	0	0	0	0.388941	0	1.49366	0.211696
assembly11766_500bp	0	0	0	0	0	0	0	0	0	0	0	0	0	0	0	0	0	0
assembly11767_594bp	0	0	0.248287	0	0	0	0	0	0	0	0	0	0	0	0	0	0	0
assembly11768_491bp	5.82789	5.9268	7.49132	12.6148	4.45306	11.9419	3.67288	5.96081	7.77409	7.73179	5.50547	8.66472	10.2575	9.28343	11.1931	10.2251	7.73041	4.69939
assembly11769_384bp	0	0.816787	5.4765e-45	0	0	0.8346	1.91784e-34	0	1.10288e-21	0	3.61097e-44	0	1.42531e-24	0	0	0	1.80525e-41	0
assembly1176_735bp	0.257383	2.98947	3.22316	1.87177	0	2.45039	2.72595	0	0.922399	0	3.96292	0.305118	1.1665	0	1.04286	0	5.24888	2.67227
assembly11770_433bp	0	1.56711	3.23897	1.40592	0	0	2.967	0	0.805492	0	1.76965	0	0	0	0	0	1.47921	0
assembly11771_390bp	1.14045	0	0.693024	0	1.045	4.17205	1.25042	1.77512	5.8136	1.54627	1.55991	1.50839	4.67029	4.13474	2.47271	0.692701	0	1.39161
assembly11772_332bp	0	0	0	0	0	0	0	0	0	0	0	0	0	0	0	0	0	0
assembly11773_475bp	0	0	0	0	0	0	0	0	0	0	0	0	0	0	0	0	0	0
assembly11774_313bp	0	0	0	0	0	0	0	0	0	0	0	0	0	0	0	0	0	0
assembly11775_415bp	0	0	0	0	0	0	0	0	0	0	0	0	0	0	0	0	0	0
assembly11776_627bp	0	0	0	0	0.739744	0	0	1.68236	0	0	0	0	2.03002	4.3892	1.46765	0	0	0
assembly11777_642bp	3.99343e-44	1.92882	1.78059e-42	4.66051e-71	0.54267	0	0	0.823434	0.719117	2.4225	0	1.38897	1.07265	0.55601	2.28604	3.67714	1.82327	0
assembly11778_474bp	5.07605	5.41223	4.33794	2.77516	8.60297	2.4989	3.43055	3.86933	5.24057	4.04564	7.57534	3.26688	3.34494	4.09727	3.81642	5.71564	3.32935	3.12708
assembly11779_379bp	0	0	0	0	0	0	1.24444	0	0	0	0	0	0	0	0	0	0	0
assembly1177_335bp	6.59708	4.9024	0	2.27607	0	5.01286	4.77031	1.84285	0	0	0	0	0	4.84363	0	5.58462	0	0
assembly11780_328bp	4.59139	0	3.72698	1.71855	2.8996	1.9541	0	3.58901	1.93839	7.03207	2.14384	1.99352	7.19475	6.40958	6.77463	2.80618	3.46197	1.91139
assembly11781_329bp	0	0	0	0	0	0	0	0	0	0	0	0	0	0	0	0	0	0
assembly11782_466bp	0.389056	1.31947	0	0	0	0	0	0	0	0	0	0	0.369359	0	0	0.739714	0	0.458919
assembly11783_526bp	0	0	0	0	0	0	0	0	0	0	0	0	0	0	0	0	0	0
assembly11784_373bp	0	3.33018	0	0	0	0	0	0	0	0	0	0	1.33417	0	0	0	0	0
assembly11785_316bp	2.70788	0	0	0	1.25233	0	0	1.07895	0	0	0	0	0	4.32356	0	0.811769	1.41259	1.53351
assembly11786_359bp	0.810076	0	0	0	0	1.02508	0	0	0	0	0	0	0	0	0	0	0	0
assembly11787_579bp	6.67094	1.49249	4.14139	5.06208	4.50176	2.63073	4.77241	5.26729	2.14276	8.16747	1.71269	3.27443	2.08277	4.27772	1.8409	4.96026	2.37343	3.58003
assembly11788_486bp	3.89573	3.71279	1.99749	3.2031	5.29556	4.00425	3.65599	2.10102	3.36489	1.87304	2.17317	2.0774	3.34533	2.90099	3.18873	2.30278	3.24727	2.64867
assembly11789_345bp	0	0.880469	0	0	0	0	0	0	0	0	0	0	0	0	0	0	0	0.902689
assembly1178_1286bp	0	7.75071	13.6957	2.50549	0.103171	7.37249	7.93551	0.0803184	2.82491	0.0944054	10.4182	2.05224	3.00521	0.217649	1.69249	0	5.65872	2.22158
assembly11790_405bp	1.45622	0	3.4343	0	0	0	0	0	0	1.39288	0	0	4.11194	1.6255	0	2.74573	0	0
assembly11791_350bp	0	0	0	0	0	0.853209	4.43496	0	0	0	0	0	1.99066	0	1.54233	0	1.60128	0
assembly11792_447bp	8.23342	6.57425	6.80784	7.61315	6.76453	10.8808	11.0325	8.1998	5.13423	10.6997	4.98369	4.78053	9.76647	12.5158	8.1079	12.4748	7.10094	7.62716
assembly11793_425bp	0	3.75924	6.54826	1.07641	0	0.637783	2.45505	0	0	0	0.729406	1.39723	2.04054	0	0	0	1.12444	0
assembly11794_497bp	0	0	0	0	0	0	0	0	0	0	0.39321	0	0	0	0	0	0	0.343954
assembly11795_377bp	0	0	0	0	0	0	0	0	0	0	0	0	0	0	0	0	0	0
assembly11796_464bp	0.591007	3.10093e-25	0.64797	1.05458	0.594925	0.611543	0	0.958508	0	8.26418e-67	0.698642	1.36747	0.525574	1.29129	0	1.06026	0	1.22334
assembly11797_339bp	0	0	0	0	0	0	0	0	0	0	0	0	0	0	0	0	0	0
assembly11798_302bp	0	0	0	0	0	0	0	0	0	0	0	0	0	0	0	0	0	0
assembly11799_377bp	1.59399	0	0.888232	0	1.57415	0	1.62725	0.642388	0	0.72675	3.00405	1.9425	0.734139	0.855539	1.68687	1.42865	0	8.5915e-58
assembly1179_620bp	0	3.12773	6.92448	1.88129	0.21636	4.61455	5.31724	0.341862	1.10455	0.204074	2.70655	0	1.26031	1.23594	0.94223	0.656445	4.88632	1.37589
[truncated: 88,233 more rows]
