# Supplementary material for: Transcriptomic profiling of purple broccoli reveals light-induced anthocyanin biosynthetic signaling and structural genes
Source: PeerJ. 2020 May 5;8:e8870. doi: 10.7717/peerj.8870 (PMC7207213; doi:10.7717/peerj.8870)
Supplement: Table S8 [file peerj-08-8870-s013.xlsx]

## Sheet: Sheet1
Table S6 specially expressed DEGs in cluster 8 under head shading condition
gene_id
assembly10585_556bp
assembly10735_354bp
assembly10807_453bp
assembly10809_366bp
assembly11000_478bp
assembly11338_363bp
assembly11549_366bp
assembly11643_893bp
assembly11800_330bp
assembly11900_879bp
assembly11935_2999bp
assembly12061_1753bp
assembly12095_1174bp
assembly12158_556bp
assembly1219_347bp
assembly12881_814bp
assembly12894_611bp
assembly12936_746bp
assembly13176_771bp
assembly13359_1160bp
assembly13432_545bp
assembly13526_482bp
assembly13542_4533bp
assembly13606_2631bp
assembly13640_1286bp
assembly13673_1168bp
assembly14032_338bp
assembly1435_479bp
assembly14408_1954bp
assembly14412_2027bp
assembly14441_1795bp
assembly14517_1301bp
assembly14525_1540bp
assembly14863_1624bp
assembly15451_1261bp
assembly15458_1387bp
assembly15895_1446bp
assembly16274_1012bp
assembly16278_557bp
assembly16620_1386bp
assembly16704_1224bp
assembly16758_774bp
assembly17116_317bp
assembly17312_679bp
assembly17794_980bp
assembly17864_330bp
assembly18165_1889bp
assembly18456_309bp
assembly1909_499bp
assembly19275_615bp
assembly19302_457bp
assembly1944_2052bp
assembly19730_313bp
assembly19832_985bp
assembly20255_1778bp
assembly2051_643bp
assembly206_518bp
assembly21072_2116bp
assembly21660_1649bp
assembly21900_1413bp
assembly21901_1605bp
assembly22237_493bp
assembly22240_2185bp
assembly2243_354bp
assembly2281_1142bp
assembly2293_522bp
assembly23007_354bp
assembly23151_1422bp
assembly23259_1037bp
assembly23392_603bp
assembly23417_335bp
assembly23539_2201bp
assembly23650_1957bp
assembly23798_2045bp
assembly23986_1479bp
assembly24019_1044bp
assembly24056_1513bp
assembly2425_665bp
assembly24334_2977bp
assembly24339_3964bp
assembly24343_1131bp
assembly24709_4435bp
assembly24766_2628bp
assembly24767_783bp
assembly24901_2708bp
assembly24998_747bp
assembly24999_394bp
assembly25138_1918bp
assembly25229_737bp
assembly25230_1561bp
assembly25572_651bp
assembly25699_997bp
assembly25825_1876bp
assembly26116_1772bp
assembly26122_1963bp
assembly26192_440bp
assembly26342_1429bp
assembly26746_510bp
assembly26886_412bp
assembly26918_446bp
assembly26975_665bp
assembly27017_504bp
assembly27136_573bp
assembly27445_702bp
assembly27561_396bp
assembly27656_411bp
assembly27849_300bp
assembly28044_376bp
assembly28142_409bp
assembly28221_306bp
assembly28248_875bp
assembly28299_1009bp
assembly28606_458bp
assembly28764_390bp
assembly2885_772bp
assembly28885_1157bp
assembly29085_686bp
assembly29227_794bp
assembly29408_656bp
assembly29466_361bp
assembly29587_1402bp
assembly29745_825bp
assembly30000_551bp
assembly30026_2736bp
assembly30214_305bp
assembly30736_1105bp
assembly30741_1988bp
assembly3074_565bp
assembly30805_875bp
assembly31164_1330bp
assembly31166_1786bp
assembly31540_1152bp
assembly31915_483bp
assembly3208_1792bp
assembly32152_524bp
assembly32427_1458bp
assembly32440_2369bp
assembly32694_580bp
assembly33343_345bp
assembly33487_2439bp
assembly33755_1036bp
assembly33958_2969bp
assembly34134_516bp
assembly34215_1723bp
assembly34949_795bp
assembly34950_1323bp
assembly35067_921bp
assembly35387_754bp
assembly35388_407bp
assembly35515_527bp
assembly35590_1614bp
assembly35728_2280bp
assembly35730_939bp
assembly35811_1164bp
assembly35917_1632bp
assembly35976_422bp
assembly36120_909bp
assembly36772_437bp
assembly3695_370bp
assembly37108_1193bp
assembly37369_383bp
assembly37465_700bp
assembly37469_567bp
assembly37544_448bp
assembly3809_1761bp
assembly38127_401bp
assembly38779_434bp
assembly40054_430bp
assembly40391_300bp
assembly40518_310bp
assembly40821_311bp
assembly41034_1249bp
assembly41325_1094bp
assembly41330_1297bp
assembly414_469bp
assembly41635_889bp
assembly41819_1091bp
assembly42058_329bp
assembly42130_754bp
assembly42132_682bp
assembly42514_1160bp
assembly42860_548bp
assembly43087_1487bp
assembly44080_501bp
assembly44092_1687bp
assembly44097_2059bp
assembly44483_1077bp
assembly44699_1078bp
assembly44831_667bp
assembly45043_1473bp
assembly45044_663bp
assembly45061_329bp
assembly45122_308bp
assembly45368_2170bp
assembly45485_1311bp
assembly4549_2215bp
assembly46591_1165bp
assembly46668_450bp
assembly46774_457bp
assembly46882_574bp
assembly474_338bp
assembly47659_1663bp
assembly4769_1919bp
assembly4787_766bp
assembly48143_308bp
assembly48641_337bp
assembly48870_322bp
assembly49664_426bp
assembly49774_1690bp
assembly50467_762bp
assembly50841_375bp
assembly51865_307bp
assembly51873_647bp
assembly52194_444bp
assembly52233_746bp
assembly52587_1262bp
assembly52756_780bp
assembly52899_1660bp
assembly53400_1390bp
assembly53500_1215bp
assembly53543_1435bp
assembly53545_2445bp
assembly53622_1464bp
assembly53953_310bp
assembly53954_638bp
assembly54390_948bp
assembly54590_1564bp
assembly54717_1031bp
assembly55119_1255bp
assembly55301_666bp
assembly55332_703bp
assembly55456_1218bp
assembly55509_1008bp
assembly55566_1181bp
assembly55711_2719bp
assembly55818_837bp
assembly5600_481bp
assembly56262_5296bp
assembly56336_1556bp
assembly56340_1512bp
assembly56354_1315bp
assembly56657_521bp
assembly56658_657bp
assembly56941_1469bp
assembly569_325bp
assembly57013_809bp
assembly57270_489bp
assembly58494_769bp
assembly58963_2568bp
assembly59131_576bp
assembly59419_477bp
assembly5963_338bp
assembly59751_338bp
assembly5984_326bp
assembly59963_379bp
assembly60021_337bp
assembly60417_323bp
assembly60420_465bp
assembly60843_468bp
assembly60954_360bp
assembly61235_327bp
assembly61722_521bp
assembly62680_311bp
assembly62815_320bp
assembly63554_380bp
assembly63602_2018bp
assembly63699_1146bp
assembly63786_457bp
assembly63813_882bp
assembly6385_660bp
assembly64076_362bp
assembly64388_1318bp
assembly64759_706bp
assembly6483_398bp
assembly65020_693bp
assembly65360_614bp
assembly65584_2534bp
assembly65961_501bp
assembly66090_1918bp
assembly66138_920bp
assembly66140_1526bp
assembly66244_742bp
assembly66427_924bp
assembly66851_758bp
assembly66884_1253bp
assembly6690_1732bp
assembly66920_725bp
assembly66922_547bp
assembly67095_603bp
assembly67153_303bp
assembly67183_867bp
assembly67625_5707bp
assembly67810_2159bp
assembly68048_471bp
assembly68051_557bp
assembly68118_466bp
assembly68329_589bp
assembly68383_2717bp
assembly68935_1079bp
assembly6926_444bp
assembly70237_393bp
assembly7041_490bp
assembly70895_306bp
assembly71308_312bp
assembly71693_875bp
assembly72207_529bp
assembly72558_1482bp
assembly73391_1029bp
assembly73476_395bp
assembly73572_524bp
assembly7385_526bp
assembly73863_375bp
assembly7406_401bp
assembly7416_1206bp
assembly74604_519bp
assembly75197_1170bp
assembly75225_1388bp
assembly75265_2332bp
assembly75480_396bp
assembly75557_301bp
assembly75676_1428bp
assembly75909_1108bp
assembly76115_483bp
assembly77155_2128bp
assembly77541_4738bp
assembly77783_315bp
assembly78396_544bp
assembly79169_331bp
assembly79176_372bp
assembly79213_329bp
assembly79452_378bp
assembly79620_369bp
assembly79722_481bp
assembly80330_305bp
assembly80898_2544bp
assembly81212_1070bp
assembly81271_1291bp
assembly81350_759bp
assembly81737_398bp
assembly81782_1029bp
assembly81789_3351bp
assembly81969_486bp
assembly82189_1619bp
assembly82217_1289bp
assembly82777_1454bp
assembly8290_516bp
assembly83043_1731bp
assembly8310_596bp
assembly83245_609bp
assembly85079_396bp
assembly85351_739bp
assembly85815_333bp
assembly85861_313bp
assembly8605_542bp
assembly86332_826bp
assembly86671_2326bp
assembly8756_2649bp
assembly876_1052bp
assembly87770_753bp
assembly88021_482bp
assembly8825_330bp
assembly88766_1750bp
assembly89057_852bp
assembly89263_631bp
assembly89350_302bp
assembly89634_859bp
assembly89817_301bp
assembly90043_791bp
assembly90200_381bp
assembly9198_1090bp
assembly9222_1330bp
assembly9512_670bp
assembly9610_448bp
