# Supplementary material for: Transcriptomic profiling of purple broccoli reveals light-induced anthocyanin biosynthetic signaling and structural genes
Source: PeerJ. 2020 May 5;8:e8870. doi: 10.7717/peerj.8870 (PMC7207213; doi:10.7717/peerj.8870)
Supplement: Table S9 [file peerj-08-8870-s014.xlsx]

## Sheet: Sheet1
Table S7 specially expressed DEGs in cluster 8 under normal light condition
gene_id
assembly10075_2758bp
assembly1031_1378bp
assembly1037_3574bp
assembly1038_3568bp
assembly10414_883bp
assembly1055_1181bp
assembly10612_695bp
assembly10715_1010bp
assembly10774_884bp
assembly10776_1698bp
assembly10869_312bp
assembly10877_392bp
assembly10917_672bp
assembly10924_421bp
assembly10987_521bp
assembly10994_1006bp
assembly1107_853bp
assembly11083_681bp
assembly11141_518bp
assembly11167_997bp
assembly11310_740bp
assembly11311_685bp
assembly1145_667bp
assembly11702_338bp
assembly11776_627bp
assembly11804_315bp
assembly11807_301bp
assembly11821_389bp
assembly11896_1177bp
assembly11924_1838bp
assembly11925_1992bp
assembly12011_1650bp
assembly12046_487bp
assembly12106_1534bp
assembly12199_1189bp
assembly12220_2330bp
assembly12226_1185bp
assembly12283_866bp
assembly12297_757bp
assembly12325_2939bp
assembly12369_842bp
assembly12614_952bp
assembly12646_1941bp
assembly12662_2288bp
assembly12775_1434bp
assembly12818_925bp
assembly12866_3265bp
assembly12867_3098bp
assembly1286_434bp
assembly12907_1208bp
assembly13005_879bp
assembly13044_1855bp
assembly13058_516bp
assembly13070_1404bp
assembly13146_585bp
assembly1316_826bp
assembly13172_312bp
assembly13333_857bp
assembly13453_309bp
assembly13534_1372bp
assembly13543_4653bp
assembly13557_419bp
assembly13617_1512bp
assembly13650_588bp
assembly13665_1127bp
assembly13680_1014bp
assembly13742_3038bp
assembly13794_1363bp
assembly13795_1277bp
assembly13811_608bp
assembly14000_811bp
assembly14015_614bp
assembly14034_343bp
assembly14059_1028bp
assembly14077_494bp
assembly14141_2990bp
assembly14243_395bp
assembly14286_718bp
assembly14307_1403bp
assembly14363_1030bp
assembly14378_2301bp
assembly14403_1527bp
assembly14409_1923bp
assembly14413_2112bp
assembly14489_558bp
assembly14550_624bp
assembly14559_1983bp
assembly14561_1775bp
assembly14584_1170bp
assembly14586_1197bp
assembly14591_1768bp
assembly14592_1189bp
assembly14608_641bp
assembly14612_2261bp
assembly14624_1882bp
assembly14626_1793bp
assembly14748_1098bp
assembly14777_1598bp
assembly14782_2950bp
assembly14868_1524bp
assembly14876_658bp
assembly14972_1709bp
assembly14975_1089bp
assembly15035_556bp
assembly15131_1132bp
assembly15253_1095bp
assembly15349_2804bp
assembly1542_853bp
assembly1543_567bp
assembly15444_1320bp
assembly15453_953bp
assembly15472_1212bp
assembly15486_931bp
assembly15534_3732bp
assembly15544_1548bp
assembly15684_1661bp
assembly15708_710bp
assembly15953_345bp
assembly15974_427bp
assembly16074_335bp
assembly16189_3268bp
assembly16302_839bp
assembly16507_3732bp
assembly16511_2345bp
assembly16610_942bp
assembly16618_3043bp
assembly16903_461bp
assembly16922_1526bp
assembly16970_346bp
assembly17157_1075bp
assembly17176_674bp
assembly17201_356bp
assembly17203_363bp
assembly17207_335bp
assembly17274_305bp
assembly17370_1466bp
assembly17517_307bp
assembly17537_340bp
assembly17577_643bp
assembly17665_583bp
assembly17800_1085bp
assembly17823_364bp
assembly1800_334bp
assembly18028_324bp
assembly18035_1182bp
assembly18039_377bp
assembly18149_419bp
assembly18166_360bp
assembly18179_950bp
assembly18181_344bp
assembly18191_626bp
assembly18201_3387bp
assembly18225_357bp
assembly1826_335bp
assembly18300_312bp
assembly18344_2150bp
assembly18346_1340bp
assembly18408_358bp
assembly18489_389bp
assembly18605_417bp
assembly18623_576bp
assembly18632_340bp
assembly18670_798bp
assembly18695_1425bp
assembly18715_654bp
assembly18718_1178bp
assembly1874_694bp
assembly1875_872bp
assembly18872_2010bp
assembly18902_633bp
assembly19178_2592bp
assembly1917_380bp
assembly19266_1106bp
assembly19292_462bp
assembly19296_6384bp
assembly19298_975bp
assembly19388_306bp
assembly19502_1064bp
assembly19627_860bp
assembly19664_430bp
assembly19774_912bp
assembly19827_668bp
assembly19865_753bp
assembly19905_440bp
assembly1997_1996bp
assembly20006_621bp
assembly20161_854bp
assembly20203_1203bp
assembly20212_1024bp
assembly20240_1133bp
assembly20332_948bp
assembly2038_1749bp
assembly20502_861bp
assembly20640_351bp
assembly20646_502bp
assembly20824_627bp
assembly20935_533bp
assembly20980_1135bp
assembly21103_1112bp
assembly21145_1070bp
assembly2116_852bp
assembly21248_424bp
assembly21271_761bp
assembly21291_906bp
assembly21354_407bp
assembly21373_1494bp
assembly21482_303bp
assembly21530_993bp
assembly21546_1125bp
assembly2154_1512bp
assembly21671_2746bp
assembly2168_3009bp
assembly21722_349bp
assembly21795_1212bp
assembly21815_1300bp
assembly21823_841bp
assembly21907_1157bp
assembly21943_3700bp
assembly22134_468bp
assembly22137_2522bp
assembly22165_467bp
assembly22199_406bp
assembly22260_1928bp
assembly22300_384bp
assembly22309_374bp
assembly2241_805bp
assembly22490_713bp
assembly22543_384bp
assembly22669_1763bp
assembly22710_301bp
assembly22738_943bp
assembly22779_1358bp
assembly22824_874bp
assembly22828_604bp
assembly22855_450bp
assembly22_330bp
assembly23055_2199bp
assembly23179_908bp
assembly23183_1315bp
assembly231_485bp
assembly23250_529bp
assembly23326_553bp
assembly23353_890bp
assembly23427_385bp
assembly23519_425bp
assembly23520_1241bp
assembly23567_1529bp
assembly23568_1612bp
assembly23719_1490bp
assembly23721_1444bp
assembly23734_624bp
assembly23782_2002bp
assembly23804_561bp
assembly2382_2844bp
assembly23920_2997bp
assembly23949_1302bp
assembly24055_1673bp
assembly24058_2679bp
assembly2414_1050bp
assembly24159_508bp
assembly24303_2264bp
assembly24309_954bp
assembly24381_1246bp
assembly24441_1435bp
assembly24551_1367bp
assembly24554_1737bp
assembly2457_1398bp
assembly24705_343bp
assembly24710_981bp
assembly24785_346bp
assembly2486_1399bp
assembly24907_734bp
assembly24919_999bp
assembly24967_2858bp
assembly24969_385bp
assembly25058_1328bp
assembly25169_1028bp
assembly25285_1944bp
assembly25459_2803bp
assembly25472_2562bp
assembly25473_2671bp
assembly25506_455bp
assembly25566_729bp
assembly25620_2246bp
assembly25826_1057bp
assembly25858_1080bp
assembly25964_918bp
assembly26008_2895bp
assembly26009_362bp
assembly26055_1743bp
assembly26117_1802bp
assembly26118_2041bp
assembly26123_2011bp
assembly26143_1152bp
assembly26319_1594bp
assembly26327_586bp
assembly26353_5153bp
assembly26356_2006bp
assembly26357_418bp
assembly2635_503bp
assembly26440_520bp
assembly26497_323bp
assembly26580_1126bp
assembly26584_1938bp
assembly26678_308bp
assembly26688_389bp
assembly26694_300bp
assembly26876_387bp
assembly27093_394bp
assembly27152_616bp
assembly27160_319bp
assembly27185_505bp
assembly27225_331bp
assembly27278_849bp
assembly27309_892bp
assembly27407_610bp
assembly27605_377bp
assembly27692_1195bp
assembly27934_1625bp
assembly28014_642bp
assembly28048_587bp
assembly28102_716bp
assembly28128_513bp
assembly28213_395bp
assembly28244_1834bp
assembly28349_587bp
assembly28428_622bp
assembly28490_623bp
assembly28531_582bp
assembly28537_962bp
assembly28673_520bp
assembly28851_366bp
assembly29030_1147bp
assembly29035_2375bp
assembly29086_844bp
assembly29220_581bp
assembly29285_2075bp
assembly29564_772bp
assembly29606_1890bp
assembly29613_1064bp
assembly29827_736bp
assembly29894_504bp
assembly29975_1940bp
assembly30033_1572bp
assembly3005_748bp
assembly30101_794bp
assembly30154_325bp
assembly30233_1087bp
assembly30298_2457bp
assembly30301_1381bp
assembly30302_1189bp
assembly30416_767bp
assembly30470_662bp
assembly30474_386bp
assembly30490_1088bp
assembly30519_2167bp
assembly3061_902bp
assembly3065_844bp
assembly3067_1905bp
assembly30699_1252bp
assembly30800_858bp
assembly30801_1738bp
assembly30852_1220bp
assembly31078_1664bp
assembly31083_1431bp
assembly3108_548bp
assembly31147_1589bp
assembly31195_1302bp
assembly31204_945bp
assembly31246_606bp
assembly31261_424bp
assembly31277_1319bp
assembly31337_362bp
assembly3134_660bp
assembly31399_1553bp
assembly31404_939bp
assembly31413_813bp
assembly31418_421bp
assembly31490_1684bp
assembly31518_866bp
assembly3151_994bp
assembly31521_1259bp
assembly3158_984bp
assembly31633_2408bp
assembly31732_461bp
assembly31787_755bp
assembly3178_1112bp
assembly31819_1412bp
assembly3186_1785bp
assembly31900_1191bp
assembly31986_1107bp
assembly31987_1278bp
assembly32021_1692bp
assembly32037_558bp
assembly3205_1632bp
assembly3206_1725bp
assembly32158_2208bp
assembly32211_1637bp
assembly32245_692bp
assembly32263_2400bp
assembly32276_2041bp
assembly32284_1038bp
assembly32312_800bp
assembly32333_643bp
assembly32428_2028bp
assembly32438_2179bp
assembly3244_1357bp
assembly32500_312bp
assembly32773_2066bp
assembly32892_1287bp
assembly32897_1529bp
assembly32898_1097bp
assembly32937_1798bp
assembly33036_3082bp
assembly33060_2675bp
assembly33107_980bp
assembly33166_2521bp
assembly33167_2470bp
assembly33206_2389bp
assembly33370_428bp
assembly33531_1130bp
assembly33553_1095bp
assembly33653_1075bp
assembly33701_571bp
assembly33702_384bp
assembly33814_548bp
assembly33891_387bp
assembly33904_1105bp
assembly33932_657bp
assembly33989_2549bp
assembly34039_2034bp
assembly34110_1621bp
assembly34114_1719bp
assembly34141_843bp
assembly34211_629bp
assembly34234_1368bp
assembly34243_588bp
assembly34358_2692bp
assembly34380_766bp
assembly3440_2493bp
assembly34418_986bp
assembly34596_3584bp
assembly34670_1953bp
assembly34698_365bp
assembly34951_391bp
assembly34965_999bp
assembly35083_3551bp
assembly35222_2666bp
assembly35240_590bp
assembly35359_1254bp
assembly35486_1575bp
assembly35658_336bp
assembly3584_679bp
assembly35905_730bp
assembly35957_1440bp
assembly35962_1865bp
assembly36083_1426bp
assembly36121_1502bp
assembly36129_1321bp
assembly36158_357bp
assembly36247_460bp
assembly36297_675bp
assembly36449_627bp
assembly36472_471bp
assembly36521_579bp
assembly36576_407bp
assembly36593_347bp
assembly36713_402bp
assembly36842_324bp
assembly36956_1013bp
assembly36958_1718bp
assembly36991_732bp
assembly36993_4043bp
assembly36997_1326bp
assembly37020_1039bp
assembly37063_751bp
assembly37255_634bp
assembly37393_2022bp
assembly37519_439bp
assembly37573_577bp
assembly37777_947bp
assembly37820_411bp
assembly37901_498bp
assembly37902_818bp
assembly37965_706bp
assembly37973_504bp
assembly37982_875bp
assembly38019_1849bp
assembly3811_1687bp
assembly38180_424bp
assembly38230_572bp
assembly38261_535bp
assembly38416_415bp
assembly38459_311bp
assembly38564_636bp
assembly38624_332bp
assembly38652_671bp
assembly38696_621bp
assembly38743_1671bp
assembly38812_1837bp
assembly38892_692bp
assembly38908_308bp
assembly38913_340bp
assembly38914_326bp
assembly38937_465bp
assembly39072_604bp
assembly39111_814bp
assembly3912_720bp
assembly39352_543bp
assembly39417_829bp
assembly39429_589bp
assembly39479_746bp
assembly39644_406bp
assembly39653_520bp
assembly39669_310bp
assembly39684_470bp
assembly39919_1072bp
assembly39999_311bp
assembly40001_543bp
assembly40137_1385bp
assembly40183_692bp
assembly40193_529bp
assembly40414_466bp
assembly40424_454bp
assembly40567_308bp
assembly40589_549bp
assembly40617_693bp
assembly40680_424bp
assembly40828_760bp
assembly40903_955bp
assembly40979_423bp
assembly41008_487bp
assembly4106_4663bp
assembly41130_315bp
assembly4122_400bp
assembly41235_1289bp
assembly41299_1356bp
assembly41400_585bp
assembly41429_353bp
assembly4142_507bp
assembly41518_997bp
assembly4152_892bp
assembly41537_491bp
assembly4153_428bp
assembly41562_593bp
assembly41597_417bp
assembly41626_760bp
assembly41657_1092bp
assembly41763_799bp
assembly42131_677bp
assembly42143_1874bp
assembly42301_539bp
assembly42317_987bp
assembly42525_1110bp
assembly42544_1547bp
assembly42592_683bp
assembly42617_302bp
assembly42624_313bp
assembly42633_529bp
assembly42636_1655bp
assembly42644_1368bp
assembly42712_947bp
assembly42781_1169bp
assembly42812_775bp
assembly42925_1250bp
assembly43033_3505bp
assembly43088_1401bp
assembly43089_1175bp
assembly43174_562bp
assembly43209_1848bp
assembly43350_1371bp
assembly43382_1493bp
assembly43542_1262bp
assembly43551_335bp
assembly43570_1705bp
assembly43591_885bp
assembly43613_397bp
assembly43661_812bp
assembly43662_345bp
assembly4369_644bp
assembly4372_337bp
assembly43814_3624bp
assembly43869_1578bp
assembly43877_1467bp
assembly43878_1537bp
assembly44031_1035bp
assembly44181_1045bp
assembly44210_768bp
assembly44244_326bp
assembly44398_1943bp
assembly44410_1714bp
assembly44484_713bp
assembly44505_369bp
assembly4450_516bp
assembly44535_1255bp
assembly44536_457bp
assembly44591_664bp
assembly44595_3610bp
assembly44598_435bp
assembly44600_2000bp
assembly44602_507bp
assembly44664_1520bp
assembly44665_1484bp
assembly44698_449bp
assembly44788_2167bp
assembly44823_887bp
assembly44824_996bp
assembly44881_677bp
assembly44882_2025bp
assembly44962_1453bp
assembly45073_886bp
assembly4513_583bp
assembly45152_920bp
assembly45178_1571bp
assembly45251_2249bp
assembly45379_768bp
assembly45542_1995bp
assembly45543_1676bp
assembly45549_910bp
assembly455_332bp
assembly45638_929bp
assembly45646_799bp
assembly45754_1515bp
assembly45806_4483bp
assembly45815_2332bp
assembly45816_3224bp
assembly45843_935bp
assembly45906_894bp
assembly45979_1728bp
assembly46031_444bp
assembly46036_1775bp
assembly46037_1313bp
assembly46140_471bp
assembly4615_968bp
assembly4616_310bp
assembly46187_764bp
assembly46290_450bp
assembly46321_408bp
assembly4634_987bp
assembly46491_2333bp
assembly46552_514bp
assembly46663_628bp
assembly46679_543bp
assembly46696_1406bp
assembly46880_620bp
assembly47046_1415bp
assembly47067_310bp
assembly471_669bp
assembly4723_304bp
assembly47307_561bp
assembly47382_836bp
assembly47420_943bp
assembly47440_620bp
assembly47454_660bp
assembly47540_1378bp
assembly47600_774bp
assembly47671_384bp
assembly47728_424bp
assembly47750_398bp
assembly47805_732bp
assembly47812_948bp
assembly47839_668bp
assembly47890_501bp
assembly47911_320bp
assembly48224_856bp
assembly48296_1699bp
assembly48306_1289bp
assembly48344_342bp
assembly48396_415bp
assembly4847_625bp
assembly48487_367bp
assembly48792_384bp
assembly49043_1130bp
assembly49068_413bp
assembly49174_1061bp
assembly49225_375bp
assembly49250_614bp
assembly49295_1137bp
assembly49297_432bp
assembly49540_347bp
assembly49541_399bp
assembly49844_713bp
assembly49855_603bp
assembly50118_607bp
assembly50440_511bp
assembly50472_1246bp
assembly50520_1601bp
assembly50549_1111bp
assembly50562_1278bp
assembly50700_339bp
assembly50790_379bp
assembly50817_1578bp
assembly50974_332bp
assembly51043_322bp
assembly51090_666bp
assembly51093_358bp
assembly51200_543bp
assembly51281_448bp
assembly51376_413bp
assembly51415_476bp
assembly5147_1002bp
assembly51545_603bp
assembly51583_364bp
assembly5160_1730bp
assembly5168_643bp
assembly51825_422bp
assembly51876_321bp
assembly51928_316bp
assembly51991_502bp
assembly52121_311bp
assembly52137_766bp
assembly52183_995bp
assembly52204_424bp
assembly52210_774bp
assembly52263_587bp
assembly523_364bp
assembly52424_312bp
assembly52563_395bp
assembly5257_1767bp
assembly52584_820bp
assembly52728_1320bp
assembly52810_646bp
assembly52811_1899bp
assembly52832_418bp
assembly5300_1428bp
assembly53026_2161bp
assembly5303_638bp
assembly53151_750bp
assembly5315_1540bp
assembly53199_721bp
assembly53200_648bp
assembly53227_478bp
assembly53242_927bp
assembly53276_780bp
assembly53296_623bp
assembly53370_496bp
assembly53376_377bp
assembly53397_1984bp
assembly53399_1294bp
assembly53456_1425bp
assembly53476_327bp
assembly53504_498bp
assembly53511_1720bp
assembly53627_1285bp
assembly53659_722bp
assembly53686_521bp
assembly53809_1087bp
assembly53827_1311bp
assembly53848_397bp
assembly53849_472bp
assembly53893_414bp
assembly5393_1272bp
assembly53965_655bp
assembly53995_320bp
assembly54027_556bp
assembly5417_403bp
assembly54181_1610bp
assembly54209_1760bp
assembly54211_1005bp
assembly54238_1122bp
assembly54251_467bp
assembly54305_1690bp
assembly54350_511bp
assembly54396_1168bp
assembly54407_941bp
assembly54457_556bp
assembly5449_428bp
assembly54508_339bp
assembly5453_530bp
assembly54620_3743bp
assembly54623_1319bp
assembly54626_1444bp
assembly54648_2989bp
assembly54675_431bp
assembly54699_747bp
assembly54837_655bp
assembly54846_814bp
assembly55253_1635bp
assembly55270_404bp
assembly55287_1109bp
assembly55384_855bp
assembly5538_359bp
assembly55422_747bp
assembly55519_922bp
assembly55546_563bp
assembly55570_1379bp
assembly55587_1629bp
assembly5570_573bp
assembly55736_1589bp
assembly5575_1123bp
assembly55868_1078bp
assembly55870_1421bp
assembly55943_1046bp
assembly55966_481bp
assembly56020_1580bp
assembly5606_584bp
assembly5610_802bp
assembly56119_934bp
assembly56235_392bp
assembly56240_1583bp
assembly56296_4041bp
assembly56361_459bp
assembly56415_3258bp
assembly56484_338bp
assembly56554_322bp
assembly56555_309bp
assembly56556_374bp
assembly56559_322bp
assembly56671_3074bp
assembly56687_326bp
assembly56739_558bp
assembly56742_1509bp
assembly56769_2359bp
assembly56919_2229bp
assembly5696_3510bp
assembly57030_2850bp
assembly57155_734bp
assembly57311_327bp
assembly57357_822bp
assembly57360_638bp
assembly57412_2428bp
assembly57634_834bp
assembly57709_3087bp
assembly57772_1722bp
assembly57789_1428bp
assembly57793_1359bp
assembly57829_3748bp
assembly57887_2286bp
assembly57936_1153bp
assembly57978_1543bp
assembly58061_355bp
assembly58180_613bp
assembly58204_1347bp
assembly58206_2381bp
assembly58209_518bp
assembly58305_1879bp
assembly58347_1580bp
assembly58351_393bp
assembly58361_1385bp
assembly58448_370bp
assembly58479_306bp
assembly58660_421bp
assembly58680_435bp
assembly58746_496bp
assembly58934_361bp
assembly59086_1228bp
assembly59323_303bp
assembly59340_309bp
assembly59355_429bp
assembly5941_348bp
assembly59530_361bp
assembly59532_480bp
assembly5956_377bp
assembly59616_388bp
assembly59802_366bp
assembly59803_386bp
assembly59880_572bp
assembly59892_718bp
assembly59913_428bp
assembly60037_551bp
assembly60312_592bp
assembly60505_1715bp
assembly60641_1177bp
assembly60660_325bp
assembly60671_2607bp
assembly60685_1440bp
assembly60696_380bp
assembly60718_500bp
assembly60719_707bp
assembly60756_768bp
assembly60809_910bp
assembly61084_321bp
assembly61124_396bp
assembly61312_320bp
assembly61371_1860bp
assembly61391_1444bp
assembly61482_936bp
assembly61763_437bp
assembly62109_735bp
assembly62147_956bp
assembly62220_872bp
assembly62248_1106bp
assembly62273_909bp
assembly62303_365bp
assembly62383_1369bp
assembly62396_520bp
assembly62410_751bp
assembly62427_887bp
assembly62537_939bp
assembly62658_705bp
assembly62668_483bp
assembly62873_430bp
assembly63002_329bp
assembly63155_740bp
assembly63187_876bp
assembly63458_3151bp
assembly63465_1396bp
assembly63543_1767bp
assembly63666_504bp
assembly6369_315bp
assembly63705_1722bp
assembly63717_1362bp
assembly63718_1107bp
assembly63721_1263bp
assembly63722_660bp
assembly63812_756bp
assembly63916_2075bp
assembly63930_1504bp
assembly63958_573bp
assembly63999_724bp
assembly639_313bp
assembly64009_367bp
assembly64049_412bp
assembly64057_413bp
assembly64125_424bp
assembly64135_616bp
assembly64181_457bp
assembly64197_332bp
assembly64331_1447bp
assembly64356_993bp
assembly64374_452bp
assembly64401_1194bp
assembly64419_1177bp
assembly64424_750bp
assembly64456_621bp
assembly64501_2205bp
assembly64534_830bp
assembly64661_598bp
assembly64668_837bp
assembly64692_351bp
assembly646_537bp
assembly64763_448bp
assembly6477_478bp
assembly64790_984bp
assembly64831_629bp
assembly64832_884bp
assembly64833_767bp
assembly65024_519bp
assembly65050_1074bp
assembly65082_312bp
assembly65108_303bp
assembly65130_372bp
assembly6515_855bp
assembly65215_744bp
assembly65235_1053bp
assembly65260_1828bp
assembly65346_2516bp
assembly65446_3583bp
assembly65525_1577bp
assembly65575_2517bp
assembly65576_2356bp
assembly65609_694bp
assembly65644_373bp
assembly65652_815bp
assembly65743_1504bp
assembly65785_458bp
assembly65970_1516bp
assembly66004_670bp
assembly66018_1574bp
assembly66026_1464bp
assembly66027_1737bp
assembly66028_1907bp
assembly66088_1673bp
assembly66151_1340bp
assembly6615_625bp
assembly66291_1046bp
assembly66301_1557bp
assembly66331_1787bp
assembly66358_629bp
assembly66384_998bp
assembly66393_1221bp
assembly66397_370bp
assembly66402_1183bp
assembly66429_958bp
assembly66455_1751bp
assembly66496_1004bp
assembly66515_1362bp
assembly66519_396bp
assembly66562_384bp
assembly66709_2175bp
assembly66737_827bp
assembly66815_804bp
assembly6681_384bp
assembly66823_974bp
assembly6682_356bp
assembly66865_916bp
assembly66924_772bp
assembly66964_1063bp
assembly67150_971bp
assembly67209_687bp
assembly67218_718bp
assembly67384_561bp
assembly67408_1312bp
assembly67414_2195bp
assembly67415_2219bp
assembly67417_768bp
assembly67434_1511bp
assembly67472_1268bp
assembly67491_368bp
assembly67493_539bp
assembly67507_2119bp
assembly67534_584bp
assembly67554_1767bp
assembly67617_618bp
assembly67624_1362bp
assembly67636_1911bp
assembly67842_2408bp
assembly67854_2124bp
assembly67906_434bp
assembly6794_318bp
assembly68065_1147bp
assembly68095_1919bp
assembly6813_852bp
assembly68144_1421bp
assembly68421_1206bp
assembly68460_2019bp
assembly68475_1018bp
assembly68502_786bp
assembly68590_675bp
assembly68591_2228bp
assembly68592_796bp
assembly68671_660bp
assembly68813_1585bp
assembly68816_991bp
assembly68900_1050bp
assembly68904_1248bp
assembly6893_827bp
assembly68979_1180bp
assembly69019_443bp
assembly69149_1088bp
assembly69153_570bp
assembly69154_1402bp
assembly69155_1603bp
assembly69176_909bp
assembly69188_2065bp
assembly69190_1944bp
assembly69196_317bp
assembly69252_5171bp
assembly69297_317bp
assembly69348_874bp
assembly69444_1492bp
assembly69447_964bp
assembly6948_3291bp
assembly6949_3454bp
assembly69603_328bp
assembly69609_413bp
assembly6963_371bp
assembly69687_821bp
assembly69723_454bp
assembly69754_472bp
assembly69797_389bp
assembly69830_417bp
assembly69857_473bp
assembly70062_736bp
assembly70105_322bp
assembly70131_846bp
assembly7023_777bp
assembly70242_1659bp
assembly70261_354bp
assembly70298_320bp
assembly70408_573bp
assembly70509_407bp
assembly70537_412bp
assembly70562_358bp
assembly70633_497bp
assembly70673_347bp
assembly70851_2935bp
assembly70869_964bp
assembly7086_734bp
assembly70948_501bp
assembly71031_389bp
assembly71070_1344bp
assembly71255_321bp
assembly7139_372bp
assembly71476_397bp
assembly7152_2177bp
assembly71621_766bp
assembly71649_1105bp
assembly71673_4640bp
assembly716_377bp
assembly71740_360bp
assembly71877_356bp
assembly72410_1218bp
assembly7243_497bp
assembly72503_703bp
assembly7251_334bp
assembly72543_631bp
assembly72552_822bp
assembly72621_1663bp
assembly72726_462bp
assembly7273_368bp
assembly72798_334bp
assembly72912_581bp
assembly73026_507bp
assembly73443_954bp
assembly73540_433bp
assembly73650_743bp
assembly73733_627bp
assembly73789_357bp
assembly7381_333bp
assembly7402_945bp
assembly74051_392bp
assembly74127_1083bp
assembly74178_920bp
assembly74361_418bp
assembly74444_1692bp
assembly74445_1279bp
assembly74492_1434bp
assembly74561_737bp
assembly74608_1050bp
assembly74713_492bp
assembly74783_437bp
assembly74796_842bp
assembly74858_1739bp
assembly74908_613bp
assembly74964_503bp
assembly74973_336bp
assembly75115_1227bp
assembly75116_799bp
assembly75153_1511bp
assembly7519_2366bp
assembly7522_671bp
assembly75238_1789bp
assembly75313_434bp
assembly75315_608bp
assembly75338_1031bp
assembly75376_447bp
assembly75545_1712bp
assembly75607_684bp
assembly75642_2432bp
assembly75863_1277bp
assembly75869_589bp
assembly75894_650bp
assembly75988_1023bp
assembly76075_1354bp
assembly76088_2203bp
assembly76196_362bp
assembly76215_625bp
assembly76405_1224bp
assembly76510_856bp
assembly76571_354bp
assembly76659_367bp
assembly76701_314bp
assembly76769_533bp
assembly76801_461bp
assembly77036_478bp
assembly77266_1012bp
assembly7731_462bp
assembly77332_1218bp
assembly77437_1801bp
assembly77448_1154bp
assembly77605_996bp
assembly7769_2487bp
assembly77705_401bp
assembly77831_375bp
assembly77832_470bp
assembly77909_1205bp
assembly77963_984bp
assembly78029_393bp
assembly78032_611bp
assembly78159_315bp
assembly78284_2423bp
assembly78305_898bp
assembly78331_1049bp
assembly78333_690bp
assembly78334_978bp
assembly7835_676bp
assembly7839_643bp
assembly78433_482bp
assembly78476_384bp
assembly78497_364bp
assembly78531_649bp
assembly78648_551bp
assembly78650_424bp
assembly78752_839bp
assembly78797_1288bp
assembly79053_333bp
assembly79088_301bp
assembly79171_1514bp
assembly79218_1383bp
assembly79219_1478bp
assembly79340_524bp
assembly79403_544bp
assembly79514_392bp
assembly79564_365bp
assembly79653_439bp
assembly79705_334bp
assembly79714_494bp
assembly79719_439bp
assembly7974_1760bp
assembly7976_307bp
assembly79775_1708bp
assembly79777_396bp
assembly79838_467bp
assembly80038_1300bp
assembly80046_937bp
assembly80189_331bp
assembly80286_925bp
assembly80334_1915bp
assembly80381_961bp
assembly805_1344bp
assembly8066_552bp
assembly80728_1049bp
assembly80738_630bp
assembly8074_401bp
assembly80847_641bp
assembly80848_582bp
assembly80851_380bp
assembly80967_326bp
assembly81034_1151bp
assembly81059_1880bp
assembly81189_317bp
assembly81192_1011bp
assembly81205_653bp
assembly8123_2686bp
assembly81240_2151bp
assembly81303_576bp
assembly8155_570bp
assembly81567_1321bp
assembly81578_1420bp
assembly81602_1941bp
assembly8164_4267bp
assembly81704_621bp
assembly81741_1417bp
assembly81742_723bp
assembly81854_1280bp
assembly81883_1287bp
assembly81915_562bp
assembly81991_1107bp
assembly82055_1731bp
assembly82147_1240bp
assembly82277_941bp
assembly82324_1596bp
assembly8235_660bp
assembly82464_1527bp
assembly82491_889bp
assembly82499_1700bp
assembly824_1634bp
assembly82515_446bp
assembly82634_1200bp
assembly82740_1947bp
assembly8298_355bp
assembly83211_677bp
assembly83258_2101bp
assembly83325_3158bp
assembly83389_849bp
assembly83405_642bp
assembly8342_524bp
assembly83452_1575bp
assembly83495_2683bp
assembly83533_395bp
assembly83535_3561bp
assembly83556_2422bp
assembly83606_471bp
assembly83607_1696bp
assembly8366_367bp
assembly83703_395bp
assembly83792_1152bp
assembly83811_383bp
assembly83833_1100bp
assembly84173_1154bp
assembly8418_668bp
assembly84254_1280bp
assembly84316_412bp
assembly84332_530bp
assembly84445_336bp
assembly84576_1686bp
assembly84583_1769bp
assembly84588_829bp
assembly84876_617bp
assembly85009_1492bp
assembly85015_2522bp
assembly85176_718bp
assembly85199_837bp
assembly8527_1094bp
assembly85382_1324bp
assembly85413_392bp
assembly85417_1537bp
assembly85515_361bp
assembly85570_417bp
assembly85586_529bp
assembly85588_345bp
assembly85609_2253bp
assembly85641_335bp
assembly8568_5880bp
assembly85741_337bp
assembly86090_440bp
assembly8619_391bp
assembly8624_1019bp
assembly86277_960bp
assembly86278_1699bp
assembly86279_1667bp
assembly86286_1764bp
assembly8631_895bp
assembly86385_756bp
assembly86434_2435bp
assembly86435_2496bp
assembly86438_1405bp
assembly86439_1239bp
assembly86534_1114bp
assembly86560_462bp
assembly86620_571bp
assembly86636_3409bp
assembly86688_1842bp
assembly86767_2419bp
assembly8679_1050bp
assembly86873_641bp
assembly86894_1170bp
assembly86925_329bp
assembly87018_418bp
assembly87057_328bp
assembly87063_866bp
assembly87132_436bp
assembly87240_1151bp
assembly87271_989bp
assembly87359_905bp
assembly87366_554bp
assembly87422_621bp
assembly87608_302bp
assembly87706_2491bp
assembly87723_1120bp
assembly87724_2055bp
assembly87759_2247bp
assembly87826_1417bp
assembly87856_1119bp
assembly87912_495bp
assembly87996_1673bp
assembly88000_747bp
assembly88022_2636bp
assembly88030_1375bp
assembly88081_2306bp
assembly88082_1599bp
assembly88235_1800bp
assembly88309_854bp
assembly88439_333bp
assembly8845_385bp
assembly88468_662bp
assembly88556_1008bp
assembly88570_730bp
assembly88678_602bp
assembly88733_1089bp
assembly88735_1180bp
assembly88755_1855bp
assembly88777_826bp
assembly88950_511bp
assembly89083_627bp
assembly89122_406bp
assembly89143_449bp
assembly89215_462bp
assembly89286_674bp
assembly89306_424bp
assembly89357_588bp
assembly89665_1283bp
assembly89744_379bp
assembly89789_431bp
assembly89871_465bp
assembly90005_332bp
assembly90028_1109bp
assembly90041_1045bp
assembly90084_2235bp
assembly90162_976bp
assembly903_622bp
assembly9067_1550bp
assembly9112_2764bp
assembly9170_2770bp
assembly9196_5825bp
assembly9277_479bp
assembly9361_1315bp
assembly9581_401bp
assembly9595_832bp
assembly9623_868bp
assembly9677_1507bp
assembly9709_786bp
assembly9760_798bp
assembly9833_416bp
assembly9938_1945bp
assembly9939_1700bp
